# Supplementary material for: Assessing arthropod biodiversity with DNA barcoding in Jinnah Garden, Lahore, Pakistan
Source: PeerJ journal article supplement (doi:10.7717/peerj.17420), 2024-05-31

# BOLD TaxonID Tree

Title : Tree Result - DS-GMPJA  
Date : 08-Nov-2023  
Data Type : Nucleotide  
Distance Model : Kimura 2 Parameter  
Marker : COI-5P  
Colourization : [blue]=Stop Codons [red]=Contamination or misidentification

Label : Sample ID  
Label : Process ID  
Label : Taxon  
Label : Barcode Cluster (BIN)

Filter : length > 400bp only  
Filter : exclude records flagged as misidentifications  
Filter : exclude records with stop codons  
Filter : exclude contaminants

Sequence Count : 8987  
Species count : 191  
Genus count : 326  
Family count : 170  
Unidentified : 7500

BIN Count : 1361

10 %

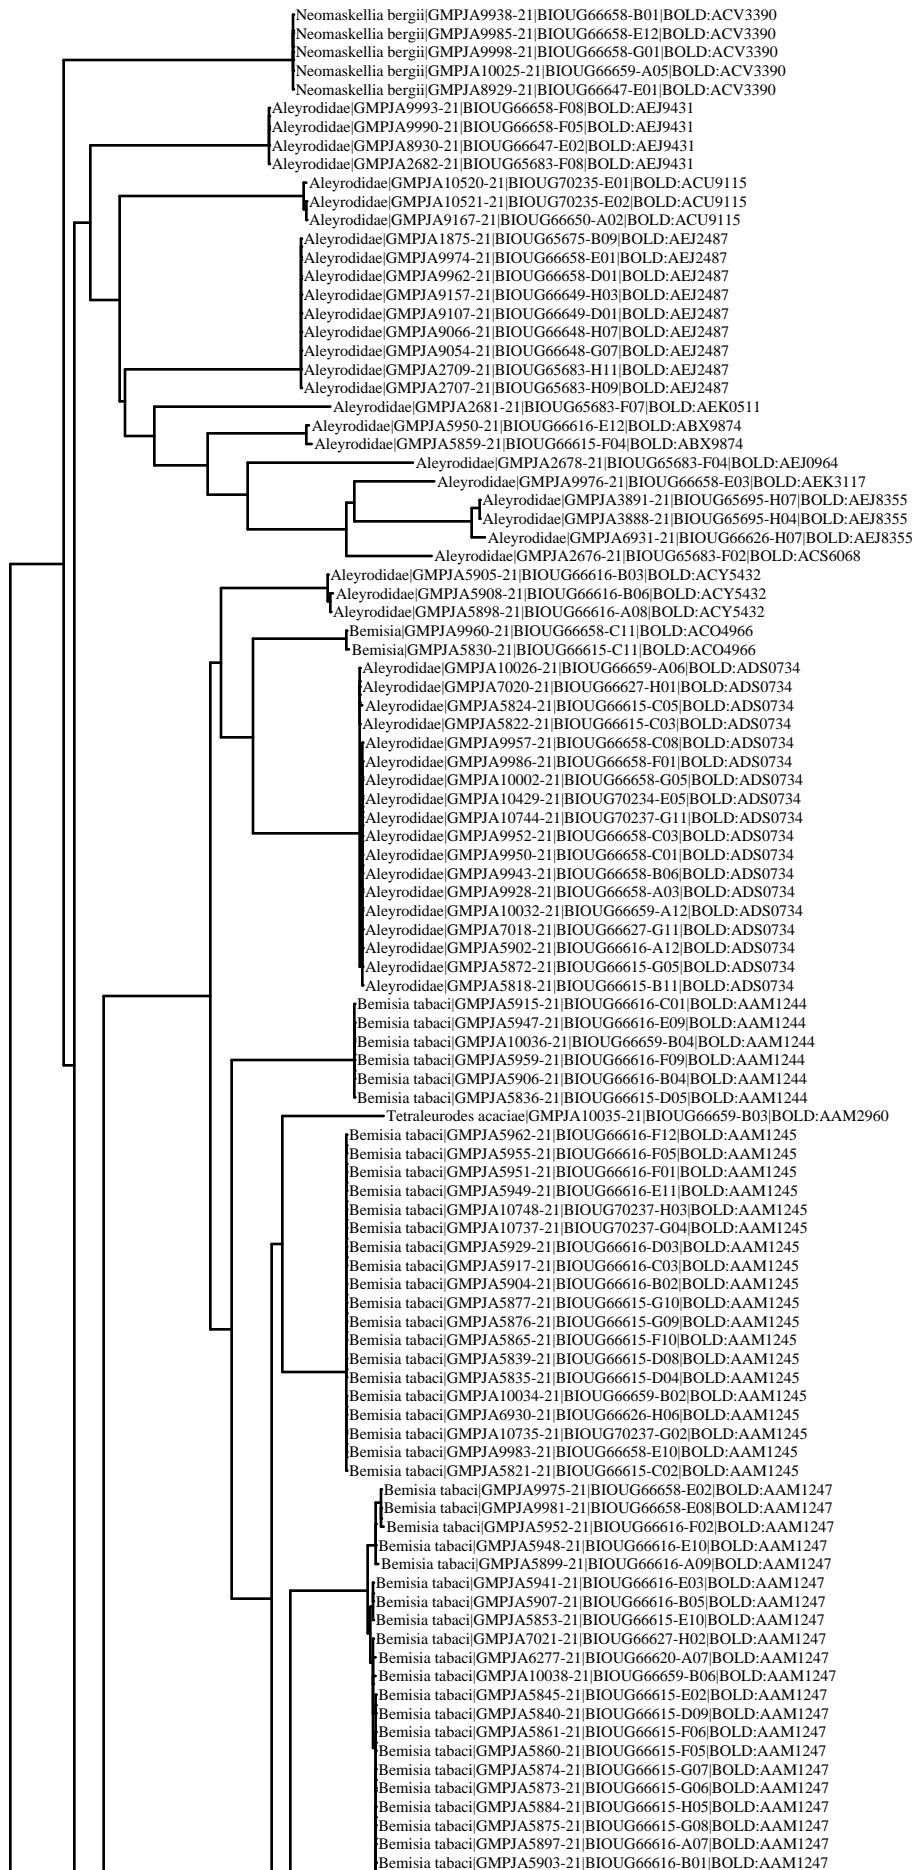

Bemisia tabaci|GMPJA5875-21|BIOUG66615-G08|BOLD:AAM1247  
 Bemisia tabaci|GMPJA5897-21|BIOUG66616-A07|BOLD:AAM1247  
 Bemisia tabaci|GMPJA5903-21|BIOUG66616-B01|BOLD:AAM1247  
 Bemisia tabaci|GMPJA5909-21|BIOUG66616-B07|BOLD:AAM1247  
 Bemisia tabaci|GMPJA5910-21|BIOUG66616-B08|BOLD:AAM1247  
 Bemisia tabaci|GMPJA5936-21|BIOUG66616-D10|BOLD:AAM1247  
 Bemisia tabaci|GMPJA5953-21|BIOUG66616-F03|BOLD:AAM1247  
 Bemisia tabaci|GMPJA5961-21|BIOUG66616-F11|BOLD:AAM1247  
 Bemisia tabaci|GMPJA5963-21|BIOUG66616-G01|BOLD:AAM1247  
 Bemisia tabaci|GMPJA9984-21|BIOUG66658-E11|BOLD:AAM1247  
 Bemisia tabaci|GMPJA5885-21|BIOUG66615-H06|BOLD:AAM1247  
 Bemisia tabaci|GMPJA5928-21|BIOUG66616-D02|BOLD:AAM1247  
 Bemisia tabaci|GMPJA9967-21|BIOUG66658-D06|BOLD:AAM1247  
 Bemisia tabaci|GMPJA5847-21|BIOUG66615-E04|BOLD:AAM1247  
 Bemisia tabaci|GMPJA5828-21|BIOUG66615-C09|BOLD:AAM1247  
 Bemisia tabaci|GMPJA9931-21|BIOUG66658-A06|BOLD:AAM1248  
 Bemisia tabaci|GMPJA10738-21|BIOUG70237-G05|BOLD:AAM1248  
 Bemisia tabaci|GMPJA9973-21|BIOUG66658-D12|BOLD:AAM1248  
 Bemisia tabaci|GMPJA10739-21|BIOUG70237-G06|BOLD:AAM1248  
 Bemisia tabaci|GMPJA10745-21|BIOUG70237-G12|BOLD:AAM1248  
 Bemisia tabaci|GMPJA10746-21|BIOUG70237-H01|BOLD:AAM1248  
 Bemisia tabaci|GMPJA10726-21|BIOUG70237-F05|BOLD:AAM1248  
 Bemisia tabaci|GMPJA10750-21|BIOUG70237-H05|BOLD:AAM1248  
 Bemisia tabaci|GMPJA10751-21|BIOUG70237-H06|BOLD:AAM1248  
 Bemisia tabaci|GMPJA10729-21|BIOUG70237-F08|BOLD:AAM1248  
 Bemisia tabaci|GMPJA6933-21|BIOUG66626-H09|BOLD:AAM1248  
 Bemisia tabaci|GMPJA7016-21|BIOUG66627-G09|BOLD:AAM1248  
 Bemisia tabaci|GMPJA5916-21|BIOUG66616-C02|BOLD:AAM1248  
 Bemisia tabaci|GMPJA9982-21|BIOUG66658-E09|BOLD:AAM1248  
 Bemisia tabaci|GMPJA9948-21|BIOUG66658-B11|BOLD:AAM1248  
 Bemisia tabaci|GMPJA10742-21|BIOUG70237-G09|BOLD:AAM1248  
 Bemisia tabaci|GMPJA5924-21|BIOUG66616-C10|BOLD:AAM1248  
 Bemisia tabaci|GMPJA10029-21|BIOUG66659-A09|BOLD:AAM1248  
 Bemisia tabaci|GMPJA9930-21|BIOUG66658-A05|BOLD:AAM1248  
 Bemisia tabaci|GMPJA5895-21|BIOUG66616-A05|BOLD:AAM1248  
 Bemisia tabaci|GMPJA4824-21|BIOUG66605-G02|BOLD:AAM1248  
 Bemisia tabaci|GMPJA5844-21|BIOUG66615-E01|BOLD:AAM1248  
 Bemisia tabaci|GMPJA10727-21|BIOUG70237-F06|BOLD:AAM1248  
 Bemisia tabaci|GMPJA10728-21|BIOUG70237-F07|BOLD:AAM1248  
 Bemisia tabaci|GMPJA9968-21|BIOUG66658-D07|BOLD:AAM1248  
 Bemisia tabaci|GMPJA5931-21|BIOUG66616-D05|BOLD:AAM1248  
 Bemisia tabaci|GMPJA5896-21|BIOUG66616-A06|BOLD:AAM1248  
 Bemisia tabaci|GMPJA5868-21|BIOUG66615-G01|BOLD:AAM1248  
 Bemisia tabaci|GMPJA5851-21|BIOUG66615-E08|BOLD:AAM1248  
 Bemisia tabaci|GMPJA2679-21|BIOUG65683-F05|BOLD:AAM1248  
 Bemisia|GMPJA3889-21|BIOUG65695-H05|BOLD:ADU4184  
 Bemisia|GMPJA4820-21|BIOUG66605-F10|BOLD:ADU4184  
 Bemisia|GMPJA5954-21|BIOUG66616-F04|BOLD:ADU4184  
 Aleurolobus|GMPJA10405-21|BIOUG70234-C05|BOLD:AEK3004  
 Aleyrodidae|GMPJA9937-21|BIOUG66658-A12|BOLD:AEJ0412  
 Aleurolobus|GMPJA2694-21|BIOUG65683-G08|BOLD:ACP3962  
 Aleurolobus|GMPJA2686-21|BIOUG65683-F12|BOLD:ACP3962  
 Aleyrodidae|GMPJA2683-21|BIOUG65683-F09|BOLD:AEK0409  
 Aleurolobus|GMPJA2705-21|BIOUG65683-H07|BOLD:ABY0091  
 Aleurolobus|GMPJA2680-21|BIOUG65683-F06|BOLD:ABY0091  
 Singhiella simplex|GMPJA10005-21|BIOUG66658-G08|BOLD:ACM1472  
 Singhiella simplex|GMPJA2693-21|BIOUG65683-G07|BOLD:ACM1472  
 Singhiella simplex|GMPJA10030-21|BIOUG66659-A10|BOLD:ACM1472  
 Singhiella simplex|GMPJA9992-21|BIOUG66658-F07|BOLD:ACM1472  
 Singhiella simplex|GMPJA3890-21|BIOUG65695-H06|BOLD:ACM1472  
 Singhiella simplex|GMPJA850-21|BIOUG65664-D05|BOLD:ACM1472  
 Singhiella simplex|GMPJA859-21|BIOUG65664-E02|BOLD:ACM1472  
 Singhiella simplex|GMPJA861-21|BIOUG65664-E04|BOLD:ACM1472  
 Singhiella simplex|GMPJA9999-21|BIOUG66658-G02|BOLD:ACM1472  
 Singhiella simplex|GMPJA9989-21|BIOUG66658-F04|BOLD:ACM1472  
 Singhiella simplex|GMPJA2674-21|BIOUG65683-E12|BOLD:ACM1472  
 Aleurocanthus spiniferus|GMPJA2770-21|BIOUG65684-F01|BOLD:ACZ1962  
 Aleurocanthus spiniferus|GMPJA10003-21|BIOUG66658-G06|BOLD:ACZ1962  
 Aleurocanthus spiniferus|GMPJA9991-21|BIOUG66658-F06|BOLD:ACZ1962  
 Aleurocanthus spiniferus|GMPJA2689-21|BIOUG65683-G03|BOLD:ACZ1962  
 Aleurocanthus spiniferus|GMPJA2672-21|BIOUG65683-E10|BOLD:ACZ1962  
 Aleyrodidae|GMPJA3868-21|BIOUG65695-F08|BOLD:ACR7113  
 Aleyrodidae|GMPJA9955-21|BIOUG66658-C06|BOLD:ADD2269  
 Aleyrodidae|GMPJA2671-21|BIOUG65683-E09|BOLD:AEJ7115  
 Arachnida|GMPJA783-21|BIOUG65663-F09  
 Psocodea|GMPJA9220-21|BIOUG66650-E07|BOLD:AEJ1995  
 Lepidopsocidae|GMPJA9216-21|BIOUG66650-E03|BOLD:ADU3187  
 Lepidopsocidae|GMPJA2754-21|BIOUG65684-D09|BOLD:ADU3187  
 Forcipomyiinae|GMPJA8013-21|BIOUG66638-C09|BOLD:AAO7733  
 Forcipomyiinae|GMPJA4001-21|BIOUG65697-A11|BOLD:AAO7733  
 Forcipomyiinae|GMPJA7854-21|BIOUG66636-F04|BOLD:AAO7733  
 Forcipomyiinae|GMPJA8380-21|BIOUG66642-B08|BOLD:AAO7733  
 Forcipomyiinae|GMPJA7602-21|BIOUG66634-A02|BOLD:AAO7733  
 Forcipomyiinae|GMPJA7663-21|BIOUG66634-F03|BOLD:AAO7733  
 Forcipomyiinae|GMPJA7805-21|BIOUG66636-B03|BOLD:AAO7733  
 Forcipomyiinae|GMPJA6529-21|BIOUG66622-F09|BOLD:AAO7733  
 Forcipomyiinae|GMPJA6524-21|BIOUG66622-F04|BOLD:AAO7733  
 Forcipomyiinae|GMPJA6771-21|BIOUG66625-C02|BOLD:AAO7733  
 Forcipomyiinae|GMPJA6768-21|BIOUG66625-B11|BOLD:AAO7733  
 Forcipomyiinae|GMPJA7285-21|BIOUG66630-F05|BOLD:AAO7733  
 Forcipomyiinae|GMPJA7279-21|BIOUG66630-E11|BOLD:AAO7733  
 Forcipomyiinae|GMPJA7276-21|BIOUG66630-E08|BOLD:AAO7733  
 Forcipomyiinae|GMPJA7253-21|BIOUG66630-C09|BOLD:AAO7733  
 Forcipomyiinae|GMPJA7252-21|BIOUG66630-C08|BOLD:AAO7733  
 Forcipomyiinae|GMPJA7242-21|BIOUG66630-B10|BOLD:AAO7733  
 Forcipomyiinae|GMPJA7241-21|BIOUG66630-B09|BOLD:AAO7733  
 Forcipomyiinae|GMPJA7231-21|BIOUG66630-A11|BOLD:AAO7733  
 Forcipomyiinae|GMPJA7224-21|BIOUG66630-A04|BOLD:AAO7733  
 Forcipomyiinae|GMPJA7223-21|BIOUG66630-A03|BOLD:AAO7733  
 Forcipomyiinae|GMPJA6898-21|BIOUG66626-E10|BOLD:AAO7733  
 Forcipomyiinae|GMPJA6891-21|BIOUG66626-E03|BOLD:AAO7733  
 Forcipomyiinae|GMPJA6890-21|BIOUG66626-E02|BOLD:AAO7733  
 Forcipomyiinae|GMPJA6868-21|BIOUG66626-C04|BOLD:AAO7733

Forcipomyiinae|GMPJA6891-21|BIOUG66626-E03|BOLD:AAO7733  
Forcipomyiinae|GMPJA6890-21|BIOUG66626-E02|BOLD:AAO7733  
Forcipomyiinae|GMPJA6868-21|BIOUG66626-C04|BOLD:AAO7733  
Forcipomyiinae|GMPJA6861-21|BIOUG66626-B09|BOLD:AAO7733  
Forcipomyiinae|GMPJA6860-21|BIOUG66626-B08|BOLD:AAO7733  
Forcipomyiinae|GMPJA8176-21|BIOUG66640-A06|BOLD:AAO7733  
Forcipomyiinae|GMPJA8175-21|BIOUG66640-A05|BOLD:AAO7733  
Forcipomyiinae|GMPJA8612-21|BIOUG66644-F02|BOLD:AAO7733  
Forcipomyiinae|GMPJA8608-21|BIOUG66644-E10|BOLD:AAO7733  
Forcipomyiinae|GMPJA6847-21|BIOUG66626-A07|BOLD:AAO7733  
Forcipomyiinae|GMPJA6843-21|BIOUG66626-A03|BOLD:AAO7733  
Forcipomyiinae|GMPJA7452-21|BIOUG66632-D06|BOLD:AAO7733  
Forcipomyiinae|GMPJA7442-21|BIOUG66632-C08|BOLD:AAO7733  
Forcipomyiinae|GMPJA8302-21|BIOUG66641-D01|BOLD:AAO7733  
Forcipomyiinae|GMPJA8298-21|BIOUG66641-C09|BOLD:AAO7733  
Forcipomyiinae|GMPJA8291-21|BIOUG66641-C02|BOLD:AAO7733  
Forcipomyiinae|GMPJA8273-21|BIOUG66641-A08|BOLD:AAO7733  
Forcipomyiinae|GMPJA8033-21|BIOUG66638-E05|BOLD:AAO7733  
Forcipomyiinae|GMPJA8031-21|BIOUG66638-E03|BOLD:AAO7733  
Forcipomyiinae|GMPJA8027-21|BIOUG66638-D11|BOLD:AAO7733  
Forcipomyiinae|GMPJA8019-21|BIOUG66638-D03|BOLD:AAO7733  
Forcipomyiinae|GMPJA8193-21|BIOUG66640-B11|BOLD:AAO7733  
Forcipomyiinae|GMPJA8189-21|BIOUG66640-B07|BOLD:AAO7733  
Forcipomyiinae|GMPJA8184-21|BIOUG66640-B02|BOLD:AAO7733  
Forcipomyiinae|GMPJA8177-21|BIOUG66640-A07|BOLD:AAO7733  
Forcipomyiinae|GMPJA7521-21|BIOUG66633-B04|BOLD:AAO7733  
Forcipomyiinae|GMPJA7512-21|BIOUG66633-A07|BOLD:AAO7733  
Forcipomyiinae|GMPJA7291-21|BIOUG66630-F11|BOLD:AAO7733  
Forcipomyiinae|GMPJA7290-21|BIOUG66630-F10|BOLD:AAO7733  
Forcipomyiinae|GMPJA7733-21|BIOUG66635-D02|BOLD:AAO7733  
Forcipomyiinae|GMPJA7732-21|BIOUG66635-D01|BOLD:AAO7733  
Forcipomyiinae|GMPJA7714-21|BIOUG66635-B07|BOLD:AAO7733  
Forcipomyiinae|GMPJA7713-21|BIOUG66635-B06|BOLD:AAO7733  
Forcipomyiinae|GMPJA7709-21|BIOUG66635-B02|BOLD:AAO7733  
Forcipomyiinae|GMPJA7703-21|BIOUG66635-A08|BOLD:AAO7733  
Forcipomyiinae|GMPJA7699-21|BIOUG66635-A04|BOLD:AAO7733  
Forcipomyiinae|GMPJA6903-21|BIOUG66626-F03|BOLD:AAO7733  
Forcipomyiinae|GMPJA8008-21|BIOUG66638-C04|BOLD:AAO7733  
Forcipomyiinae|GMPJA7966-21|BIOUG66637-G09|BOLD:AAO7733  
Forcipomyiinae|GMPJA7525-21|BIOUG66633-B08|BOLD:AAO7733  
Forcipomyiinae|GMPJA7522-21|BIOUG66633-B05|BOLD:AAO7733  
Forcipomyiinae|GMPJA7510-21|BIOUG66633-A05|BOLD:AAO7733  
Forcipomyiinae|GMPJA7504-21|BIOUG66632-H10|BOLD:AAO7733  
Forcipomyiinae|GMPJA7502-21|BIOUG66632-H08|BOLD:AAO7733  
Forcipomyiinae|GMPJA7501-21|BIOUG66632-H07|BOLD:AAO7733  
Forcipomyiinae|GMPJA8423-21|BIOUG66642-F03|BOLD:AAO7733  
Forcipomyiinae|GMPJA8422-21|BIOUG66642-F02|BOLD:AAO7733  
Forcipomyiinae|GMPJA8258-21|BIOUG66640-H04|BOLD:AAO7733  
Forcipomyiinae|GMPJA8239-21|BIOUG66640-F09|BOLD:AAO7733  
Forcipomyiinae|GMPJA7494-21|BIOUG66632-G12|BOLD:AAO7733  
Forcipomyiinae|GMPJA7491-21|BIOUG66632-G09|BOLD:AAO7733  
Forcipomyiinae|GMPJA7490-21|BIOUG66632-G08|BOLD:AAO7733  
Forcipomyiinae|GMPJA7489-21|BIOUG66632-G07|BOLD:AAO7733  
Forcipomyiinae|GMPJA8238-21|BIOUG66640-F08|BOLD:AAO7733  
Forcipomyiinae|GMPJA8231-21|BIOUG66640-F01|BOLD:AAO7733  
Forcipomyiinae|GMPJA8203-21|BIOUG66640-C09|BOLD:AAO7733  
Forcipomyiinae|GMPJA8196-21|BIOUG66640-C02|BOLD:AAO7733  
Forcipomyiinae|GMPJA7303-21|BIOUG66630-G11|BOLD:AAO7733  
Forcipomyiinae|GMPJA7297-21|BIOUG66630-G05|BOLD:AAO7733  
Forcipomyiinae|GMPJA7296-21|BIOUG66630-G04|BOLD:AAO7733  
Forcipomyiinae|GMPJA7294-21|BIOUG66630-G02|BOLD:AAO7733  
Forcipomyiinae|GMPJA7599-21|BIOUG66633-H10|BOLD:AAO7733  
Forcipomyiinae|GMPJA7596-21|BIOUG66633-H07|BOLD:AAO7733  
Forcipomyiinae|GMPJA7590-21|BIOUG66633-H01|BOLD:AAO7733  
Forcipomyiinae|GMPJA7583-21|BIOUG66633-G06|BOLD:AAO7733  
Forcipomyiinae|GMPJA7575-21|BIOUG66633-F10|BOLD:AAO7733  
Forcipomyiinae|GMPJA7551-21|BIOUG66633-D10|BOLD:AAO7733  
Forcipomyiinae|GMPJA7543-21|BIOUG66633-D02|BOLD:AAO7733  
Forcipomyiinae|GMPJA8085-21|BIOUG66639-A10|BOLD:AAO7733  
Forcipomyiinae|GMPJA1931-21|BIOUG65675-G05|BOLD:AAO7733  
Forcipomyiinae|GMPJA1904-21|BIOUG65675-E02|BOLD:AAO7733  
Forcipomyiinae|GMPJA7656-21|BIOUG66634-E08|BOLD:AAO7733  
Forcipomyiinae|GMPJA7655-21|BIOUG66634-E07|BOLD:AAO7733  
Forcipomyiinae|GMPJA10297-21|BIOUG70233-B04|BOLD:AAO7733  
Forcipomyiinae|GMPJA10260-21|BIOUG70232-G02|BOLD:AAO7733  
Forcipomyiinae|GMPJA8653-21|BIOUG66645-A08|BOLD:AAO7733  
Forcipomyiinae|GMPJA8642-21|BIOUG66644-H08|BOLD:AAO7733  
Forcipomyiinae|GMPJA8084-21|BIOUG66639-A09|BOLD:AAO7733  
Forcipomyiinae|GMPJA8073-21|BIOUG66638-H09|BOLD:AAO7733  
Forcipomyiinae|GMPJA8067-21|BIOUG66638-H03|BOLD:AAO7733  
Forcipomyiinae|GMPJA8066-21|BIOUG66638-H02|BOLD:AAO7733  
Forcipomyiinae|GMPJA7487-21|BIOUG66632-G05|BOLD:AAO7733  
Forcipomyiinae|GMPJA7461-21|BIOUG66632-E03|BOLD:AAO7733  
Forcipomyiinae|GMPJA7460-21|BIOUG66632-E02|BOLD:AAO7733  
Forcipomyiinae|GMPJA7347-21|BIOUG66631-C08|BOLD:AAO7733  
Forcipomyiinae|GMPJA7329-21|BIOUG66631-B02|BOLD:AAO7733  
Forcipomyiinae|GMPJA7326-21|BIOUG66631-A11|BOLD:AAO7733  
Forcipomyiinae|GMPJA7317-21|BIOUG66631-A02|BOLD:AAO7733  
Forcipomyiinae|GMPJA7305-21|BIOUG66630-H01|BOLD:AAO7733  
Forcipomyiinae|GMPJA8173-21|BIOUG66640-A03|BOLD:AAO7733  
Forcipomyiinae|GMPJA8167-21|BIOUG66639-H08|BOLD:AAO7733  
Forcipomyiinae|GMPJA8164-21|BIOUG66639-H05|BOLD:AAO7733  
Forcipomyiinae|GMPJA8159-21|BIOUG66639-G12|BOLD:AAO7733  
Forcipomyiinae|GMPJA7402-21|BIOUG66631-H03|BOLD:AAO7733  
Forcipomyiinae|GMPJA7398-21|BIOUG66631-G11|BOLD:AAO7733  
Forcipomyiinae|GMPJA7360-21|BIOUG66631-D09|BOLD:AAO7733  
Forcipomyiinae|GMPJA7359-21|BIOUG66631-D08|BOLD:AAO7733  
Forcipomyiinae|GMPJA7389-21|BIOUG66631-G02|BOLD:AAO7733  
Forcipomyiinae|GMPJA7379-21|BIOUG66631-F04|BOLD:AAO7733  
Forcipomyiinae|GMPJA7357-21|BIOUG66631-D06|BOLD:AAO7733  
Forcipomyiinae|GMPJA6815-21|BIOUG66625-F10|BOLD:AAO7733  
Forcipomyiinae|GMPJA6808-21|BIOUG66625-F03|BOLD:AAO7733  
Forcipomyiinae|GMPJA6783-21|BIOUG66625-D02|BOLD:AAO7733

Forcipomyiinae|GMPJA6815-21|BIOUG66625-F10|BOLD:AAO7733  
Forcipomyiinae|GMPJA6808-21|BIOUG66625-F03|BOLD:AAO7733  
Forcipomyiinae|GMPJA6783-21|BIOUG66625-D02|BOLD:AAO7733  
Forcipomyiinae|GMPJA6779-21|BIOUG66625-C10|BOLD:AAO7733  
Forcipomyiinae|GMPJA6773-21|BIOUG66625-C04|BOLD:AAO7733  
Forcipomyiinae|GMPJA6761-21|BIOUG66625-B04|BOLD:AAO7733  
Forcipomyiinae|GMPJA6712-21|BIOUG66624-F02|BOLD:AAO7733  
Forcipomyiinae|GMPJA6670-21|BIOUG66624-B08|BOLD:AAO7733  
Forcipomyiinae|GMPJA6666-21|BIOUG66624-B04|BOLD:AAO7733  
Forcipomyiinae|GMPJA6653-21|BIOUG66624-A03|BOLD:AAO7733  
Forcipomyiinae|GMPJA6621-21|BIOUG66623-F06|BOLD:AAO7733  
Forcipomyiinae|GMPJA6620-21|BIOUG66623-F05|BOLD:AAO7733  
Forcipomyiinae|GMPJA6607-21|BIOUG66623-E04|BOLD:AAO7733  
Forcipomyiinae|GMPJA6596-21|BIOUG66623-D05|BOLD:AAO7733  
Forcipomyiinae|GMPJA6589-21|BIOUG66623-C10|BOLD:AAO7733  
Forcipomyiinae|GMPJA6587-21|BIOUG66623-C08|BOLD:AAO7733  
Forcipomyiinae|GMPJA6584-21|BIOUG66623-C05|BOLD:AAO7733  
Forcipomyiinae|GMPJA6580-21|BIOUG66623-C01|BOLD:AAO7733  
Forcipomyiinae|GMPJA6565-21|BIOUG66623-A10|BOLD:AAO7733  
Forcipomyiinae|GMPJA6541-21|BIOUG66622-G09|BOLD:AAO7733  
Forcipomyiinae|GMPJA6537-21|BIOUG66622-G05|BOLD:AAO7733  
Forcipomyiinae|GMPJA6536-21|BIOUG66622-G04|BOLD:AAO7733  
Forcipomyiinae|GMPJA6531-21|BIOUG66622-F11|BOLD:AAO7733  
Forcipomyiinae|GMPJA6516-21|BIOUG66622-E08|BOLD:AAO7733  
Forcipomyiinae|GMPJA6511-21|BIOUG66622-E03|BOLD:AAO7733  
Forcipomyiinae|GMPJA6501-21|BIOUG66622-D05|BOLD:AAO7733  
Forcipomyiinae|GMPJA6499-21|BIOUG66622-D03|BOLD:AAO7733  
Forcipomyiinae|GMPJA6492-21|BIOUG66622-C08|BOLD:AAO7733  
Forcipomyiinae|GMPJA6406-21|BIOUG66621-D05|BOLD:AAO7733  
Forcipomyiinae|GMPJA6392-21|BIOUG66621-C03|BOLD:AAO7733  
Forcipomyiinae|GMPJA6387-21|BIOUG66621-B10|BOLD:AAO7733  
Forcipomyiinae|GMPJA6379-21|BIOUG66621-B02|BOLD:AAO7733  
Forcipomyiinae|GMPJA6376-21|BIOUG66621-A11|BOLD:AAO7733  
Forcipomyiinae|GMPJA6374-21|BIOUG66621-A09|BOLD:AAO7733  
Forcipomyiinae|GMPJA6739-21|BIOUG66624-H05|BOLD:AAO7733  
Forcipomyiinae|GMPJA6738-21|BIOUG66624-H04|BOLD:AAO7733  
Forcipomyiinae|GMPJA6736-21|BIOUG66624-H02|BOLD:AAO7733  
Forcipomyiinae|GMPJA6732-21|BIOUG66624-G10|BOLD:AAO7733  
Forcipomyiinae|GMPJA6720-21|BIOUG66624-F10|BOLD:AAO7733  
Forcipomyiinae|GMPJA6254-21|BIOUG66619-G07|BOLD:AAO7733  
Forcipomyiinae|GMPJA6193-21|BIOUG66619-B06|BOLD:AAO7733  
Forcipomyiinae|GMPJA6190-21|BIOUG66619-B03|BOLD:AAO7733  
Forcipomyiinae|GMPJA6481-21|BIOUG66622-B09|BOLD:AAO7733  
Forcipomyiinae|GMPJA6480-21|BIOUG66622-B08|BOLD:AAO7733  
Forcipomyiinae|GMPJA6477-21|BIOUG66622-B05|BOLD:AAO7733  
Forcipomyiinae|GMPJA6475-21|BIOUG66622-B03|BOLD:AAO7733  
Forcipomyiinae|GMPJA6459-21|BIOUG66621-H10|BOLD:AAO7733  
Forcipomyiinae|GMPJA6456-21|BIOUG66621-H07|BOLD:AAO7733  
Forcipomyiinae|GMPJA6448-21|BIOUG66621-G11|BOLD:AAO7733  
Forcipomyiinae|GMPJA6446-21|BIOUG66621-G09|BOLD:AAO7733  
Forcipomyiinae|GMPJA6439-21|BIOUG66621-G02|BOLD:AAO7733  
Forcipomyiinae|GMPJA8605-21|BIOUG66644-E07|BOLD:AAO7733  
Forcipomyiinae|GMPJA8604-21|BIOUG66644-E06|BOLD:AAO7733  
Forcipomyiinae|GMPJA8600-21|BIOUG66644-E02|BOLD:AAO7733  
Forcipomyiinae|GMPJA8597-21|BIOUG66644-D11|BOLD:AAO7733  
Forcipomyiinae|GMPJA7438-21|BIOUG66632-C04|BOLD:AAO7733  
Forcipomyiinae|GMPJA7437-21|BIOUG66632-C03|BOLD:AAO7733  
Forcipomyiinae|GMPJA7435-21|BIOUG66632-C01|BOLD:AAO7733  
Forcipomyiinae|GMPJA7430-21|BIOUG66632-B08|BOLD:AAO7733  
Forcipomyiinae|GMPJA8146-21|BIOUG66639-F11|BOLD:AAO7733  
Forcipomyiinae|GMPJA8142-21|BIOUG66639-F07|BOLD:AAO7733  
Forcipomyiinae|GMPJA8135-21|BIOUG66639-E12|BOLD:AAO7733  
Forcipomyiinae|GMPJA8130-21|BIOUG66639-E07|BOLD:AAO7733  
Forcipomyiinae|GMPJA8114-21|BIOUG66639-D03|BOLD:AAO7733  
Forcipomyiinae|GMPJA8106-21|BIOUG66639-C07|BOLD:AAO7733  
Forcipomyiinae|GMPJA8095-21|BIOUG66639-B08|BOLD:AAO7733  
Forcipomyiinae|GMPJA7954-21|BIOUG66637-F09|BOLD:AAO7733  
Forcipomyiinae|GMPJA7953-21|BIOUG66637-F08|BOLD:AAO7733  
Forcipomyiinae|GMPJA7952-21|BIOUG66637-F07|BOLD:AAO7733  
Forcipomyiinae|GMPJA7947-21|BIOUG66637-F02|BOLD:AAO7733  
Forcipomyiinae|GMPJA7946-21|BIOUG66637-F01|BOLD:AAO7733  
Forcipomyiinae|GMPJA7937-21|BIOUG66637-E04|BOLD:AAO7733  
Forcipomyiinae|GMPJA7935-21|BIOUG66637-E02|BOLD:AAO7733  
Forcipomyiinae|GMPJA7930-21|BIOUG66637-D09|BOLD:AAO7733  
Forcipomyiinae|GMPJA7928-21|BIOUG66637-D07|BOLD:AAO7733  
Forcipomyiinae|GMPJA7924-21|BIOUG66637-D03|BOLD:AAO7733  
Forcipomyiinae|GMPJA7918-21|BIOUG66637-C09|BOLD:AAO7733  
Forcipomyiinae|GMPJA7908-21|BIOUG66637-B11|BOLD:AAO7733  
Forcipomyiinae|GMPJA7905-21|BIOUG66637-B08|BOLD:AAO7733  
Forcipomyiinae|GMPJA7898-21|BIOUG66637-B01|BOLD:AAO7733  
Forcipomyiinae|GMPJA7895-21|BIOUG66637-A10|BOLD:AAO7733  
Forcipomyiinae|GMPJA7894-21|BIOUG66637-A09|BOLD:AAO7733  
Forcipomyiinae|GMPJA7876-21|BIOUG66636-H02|BOLD:AAO7733  
Forcipomyiinae|GMPJA7866-21|BIOUG66636-G04|BOLD:AAO7733  
Forcipomyiinae|GMPJA7845-21|BIOUG66636-E07|BOLD:AAO7733  
Forcipomyiinae|GMPJA7844-21|BIOUG66636-E06|BOLD:AAO7733  
Forcipomyiinae|GMPJA7837-21|BIOUG66636-D11|BOLD:AAO7733  
Forcipomyiinae|GMPJA8314-21|BIOUG66641-E01|BOLD:AAO7733  
Forcipomyiinae|GMPJA7815-21|BIOUG66636-C01|BOLD:AAO7733  
Forcipomyiinae|GMPJA7813-21|BIOUG66636-B11|BOLD:AAO7733  
Forcipomyiinae|GMPJA7812-21|BIOUG66636-B10|BOLD:AAO7733  
Forcipomyiinae|GMPJA7797-21|BIOUG66636-A07|BOLD:AAO7733  
Forcipomyiinae|GMPJA7795-21|BIOUG66636-A05|BOLD:AAO7733  
Forcipomyiinae|GMPJA7794-21|BIOUG66636-A04|BOLD:AAO7733  
Forcipomyiinae|GMPJA7787-21|BIOUG66635-H08|BOLD:AAO7733  
Forcipomyiinae|GMPJA7783-21|BIOUG66635-H04|BOLD:AAO7733  
Forcipomyiinae|GMPJA7782-21|BIOUG66635-H03|BOLD:AAO7733  
Forcipomyiinae|GMPJA7775-21|BIOUG66635-G08|BOLD:AAO7733  
Forcipomyiinae|GMPJA7768-21|BIOUG66635-G01|BOLD:AAO7733  
Forcipomyiinae|GMPJA7761-21|BIOUG66635-F06|BOLD:AAO7733  
Forcipomyiinae|GMPJA7760-21|BIOUG66635-F05|BOLD:AAO7733  
Forcipomyiinae|GMPJA7741-21|BIOUG66635-D10|BOLD:AAO7733  
Forcipomyiinae|GMPJA7739-21|BIOUG66635-D08|BOLD:AAO7733

Forcipomyiinae|GMPJA7760-21|BIOUG66635-F05|BOLD:AAO7733  
Forcipomyiinae|GMPJA7741-21|BIOUG66635-D10|BOLD:AAO7733  
Forcipomyiinae|GMPJA7739-21|BIOUG66635-D08|BOLD:AAO7733  
Forcipomyiinae|GMPJA8214-21|BIOUG66640-D08|BOLD:AAO7733  
Forcipomyiinae|GMPJA8205-21|BIOUG66640-C11|BOLD:AAO7733  
Forcipomyiinae|GMPJA7832-21|BIOUG66636-D06|BOLD:AAO7733  
Forcipomyiinae|GMPJA8321-21|BIOUG66641-E08|BOLD:AAO7733  
Forcipomyiinae|GMPJA7652-21|BIOUG66634-E04|BOLD:AAO7733  
Forcipomyiinae|GMPJA7651-21|BIOUG66634-E03|BOLD:AAO7733  
Forcipomyiinae|GMPJA7649-21|BIOUG66634-E01|BOLD:AAO7733  
Forcipomyiinae|GMPJA7638-21|BIOUG66634-D02|BOLD:AAO7733  
Forcipomyiinae|GMPJA8589-21|BIOUG66644-D03|BOLD:AAO7733  
Forcipomyiinae|GMPJA8588-21|BIOUG66644-D02|BOLD:AAO7733  
Forcipomyiinae|GMPJA8584-21|BIOUG66644-C10|BOLD:AAO7733  
Forcipomyiinae|GMPJA8583-21|BIOUG66644-C09|BOLD:AAO7733  
Forcipomyiinae|GMPJA7427-21|BIOUG66632-B05|BOLD:AAO7733  
Forcipomyiinae|GMPJA7421-21|BIOUG66632-A11|BOLD:AAO7733  
Forcipomyiinae|GMPJA7420-21|BIOUG66632-A10|BOLD:AAO7733  
Forcipomyiinae|GMPJA7418-21|BIOUG66632-A08|BOLD:AAO7733  
Forcipomyiinae|GMPJA6428-21|BIOUG66621-F03|BOLD:AAO7733  
Forcipomyiinae|GMPJA5200-21|BIOUG66608-F10|BOLD:AAO7733  
Forcipomyiinae|GMPJA7676-21|BIOUG66634-G04|BOLD:AAO7733  
Forcipomyiinae|GMPJA7665-21|BIOUG66634-F05|BOLD:AAO7733  
Forcipomyiinae|GMPJA7661-21|BIOUG66634-F01|BOLD:AAO7733  
Forcipomyiinae|GMPJA7657-21|BIOUG66634-E09|BOLD:AAO7733  
Forcipomyiinae|GMPJA7625-21|BIOUG66634-C01|BOLD:AAO7733  
Forcipomyiinae|GMPJA7623-21|BIOUG66634-B11|BOLD:AAO7733  
Forcipomyiinae|GMPJA7621-21|BIOUG66634-B09|BOLD:AAO7733  
Forcipomyiinae|GMPJA7620-21|BIOUG66634-B08|BOLD:AAO7733  
Forcipomyiinae|GMPJA7617-21|BIOUG66634-B05|BOLD:AAO7733  
Forcipomyiinae|GMPJA7615-21|BIOUG66634-B03|BOLD:AAO7733  
Forcipomyiinae|GMPJA7612-21|BIOUG66634-A12|BOLD:AAO7733  
Forcipomyiinae|GMPJA7611-21|BIOUG66634-A11|BOLD:AAO7733  
Forcipomyiinae|GMPJA6381-21|BIOUG66621-B04|BOLD:AAO7733  
Forcipomyiinae|GMPJA6380-21|BIOUG66621-B03|BOLD:AAO7733  
Forcipomyiinae|GMPJA5171-21|BIOUG66608-D05|BOLD:AAO7733  
Forcipomyiinae|GMPJA5162-21|BIOUG66608-C08|BOLD:AAO7733  
Forcipomyiinae|GMPJA5104-21|BIOUG66607-F09|BOLD:AAO7733  
Forcipomyiinae|GMPJA5103-21|BIOUG66607-F08|BOLD:AAO7733  
Forcipomyiinae|GMPJA5323-21|BIOUG66610-A03|BOLD:AAO7733  
Forcipomyiinae|GMPJA5050-21|BIOUG66607-B03|BOLD:AAO7733  
Forcipomyiinae|GMPJA8451-21|BIOUG66642-H07|BOLD:AAO7733  
Forcipomyiinae|GMPJA8443-21|BIOUG66642-G11|BOLD:AAO7733  
Forcipomyiinae|GMPJA8439-21|BIOUG66642-G07|BOLD:AAO7733  
Forcipomyiinae|GMPJA8424-21|BIOUG66642-F04|BOLD:AAO7733  
Forcipomyiinae|GMPJA8530-21|BIOUG66643-G03|BOLD:AAO7733  
Forcipomyiinae|GMPJA8529-21|BIOUG66643-G02|BOLD:AAO7733  
Forcipomyiinae|GMPJA8456-21|BIOUG66643-A01|BOLD:AAO7733  
Forcipomyiinae|GMPJA8453-21|BIOUG66642-H09|BOLD:AAO7733  
Forcipomyiinae|GMPJA8546-21|BIOUG66643-H07|BOLD:AAO7733  
Forcipomyiinae|GMPJA8541-21|BIOUG66643-H02|BOLD:AAO7733  
Forcipomyiinae|GMPJA8540-21|BIOUG66643-H01|BOLD:AAO7733  
Forcipomyiinae|GMPJA8537-21|BIOUG66643-G10|BOLD:AAO7733  
Forcipomyiinae|GMPJA8072-21|BIOUG66638-H08|BOLD:AAO7733  
Forcipomyiinae|GMPJA8071-21|BIOUG66638-H07|BOLD:AAO7733  
Forcipomyiinae|GMPJA8061-21|BIOUG66638-G09|BOLD:AAO7733  
Forcipomyiinae|GMPJA8056-21|BIOUG66638-G04|BOLD:AAO7733  
Forcipomyiinae|GMPJA8375-21|BIOUG66642-B03|BOLD:AAO7733  
Forcipomyiinae|GMPJA8369-21|BIOUG66642-A09|BOLD:AAO7733  
Forcipomyiinae|GMPJA8354-21|BIOUG66641-H05|BOLD:AAO7733  
Forcipomyiinae|GMPJA8307-21|BIOUG66641-D06|BOLD:AAO7733  
Forcipomyiinae|GMPJA8053-21|BIOUG66638-G01|BOLD:AAO7733  
Forcipomyiinae|GMPJA8051-21|BIOUG66638-F11|BOLD:AAO7733  
Forcipomyiinae|GMPJA8050-21|BIOUG66638-F10|BOLD:AAO7733  
Forcipomyiinae|GMPJA8039-21|BIOUG66638-E11|BOLD:AAO7733  
Forcipomyiinae|GMPJA3517-21|BIOUG65692-A02|BOLD:AAO7733  
Forcipomyiinae|GMPJA4380-21|BIOUG66601-A10|BOLD:AAO7733  
Forcipomyiinae|GMPJA3508-21|BIOUG65691-H04|BOLD:AAO7733  
Forcipomyiinae|GMPJA10327-21|BIOUG70233-D10|BOLD:AAO7733  
Forcipomyiinae|GMPJA8155-21|BIOUG66639-G08|BOLD:AAO7733  
Forcipomyiinae|GMPJA8154-21|BIOUG66639-G07|BOLD:AAO7733  
Forcipomyiinae|GMPJA8152-21|BIOUG66639-G05|BOLD:AAO7733  
Forcipomyiinae|GMPJA8150-21|BIOUG66639-G03|BOLD:AAO7733  
Forcipomyiinae|GMPJA8230-21|BIOUG66640-E12|BOLD:AAO7733  
Forcipomyiinae|GMPJA8224-21|BIOUG66640-E06|BOLD:AAO7733  
Forcipomyiinae|GMPJA8220-21|BIOUG66640-E02|BOLD:AAO7733  
Forcipomyiinae|GMPJA8219-21|BIOUG66640-E01|BOLD:AAO7733  
Forcipomyiinae|GMPJA1869-21|BIOUG65675-B03|BOLD:AAO7733  
Forcipomyiinae|GMPJA1360-21|BIOUG65669-G04|BOLD:AAO7733  
Forcipomyiinae|GMPJA1002-21|BIOUG65666-A03|BOLD:AAO7733  
Forcipomyiinae|GMPJA4025-21|BIOUG65697-C11|BOLD:AAO7733  
Forcipomyiinae|GMPJA7230-21|BIOUG66630-A10|BOLD:AAO7733  
Forcipomyiinae|GMPJA7227-21|BIOUG66630-A07|BOLD:AAO7733  
Forcipomyiinae|GMPJA4000-21|BIOUG65697-A10|BOLD:AAO7733  
Forcipomyiinae|GMPJA3548-21|BIOUG65692-C09|BOLD:AAO7733  
Forcipomyiinae|GMPJA8404-21|BIOUG66642-D08|BOLD:AAO7733  
Forcipomyiinae|GMPJA8376-21|BIOUG66642-B04|BOLD:AAO7733  
Forcipomyiinae|GMPJA2285-21|BIOUG65679-E03|BOLD:AAO7733  
Forcipomyiinae|GMPJA1613-21|BIOUG65672-D08|BOLD:AAO7733  
Forcipomyiinae|GMPJA8462-21|BIOUG66643-A07|BOLD:AAO7733  
Forcipomyiinae|GMPJA8457-21|BIOUG66643-A02|BOLD:AAO7733  
Forcipomyiinae|GMPJA2348-21|BIOUG65680-B07|BOLD:AAO7733  
Forcipomyiinae|GMPJA2314-21|BIOUG65679-G08|BOLD:AAO7733  
Forcipomyiinae|GMPJA8490-21|BIOUG66643-C11|BOLD:AAO7733  
Forcipomyiinae|GMPJA8483-21|BIOUG66643-C04|BOLD:AAO7733  
Forcipomyiinae|GMPJA7384-21|BIOUG66631-F09|BOLD:AAO7733  
Forcipomyiinae|GMPJA6506-21|BIOUG66622-D10|BOLD:AAO7733  
Forcipomyiinae|GMPJA7302-21|BIOUG66630-G10|BOLD:AAO7733  
Forcipomyiinae|GMPJA7422-21|BIOUG66632-A12|BOLD:AAO7733  
Forcipomyiinae|GMPJA1711-21|BIOUG65673-D11|BOLD:AAO7733  
Forcipomyiinae|GMPJA1662-21|BIOUG65672-H09|BOLD:AAO7733  
Forcipomyiinae|GMPJA8524-21|BIOUG66643-F09|BOLD:AAO7733  
Forcipomyiinae|GMPJA8510-21|BIOUG66643-F04|BOLD:AAO7733

Forcipomyiinae|GMPJA1662-21|BIOUG65672-H09|BOLD:AAO7733  
Forcipomyiinae|GMPJA8524-21|BIOUG66643-F09|BOLD:AAO7733  
Forcipomyiinae|GMPJA8519-21|BIOUG66643-F04|BOLD:AAO7733  
Forcipomyiinae|GMPJA8701-21|BIOUG66645-E08|BOLD:AAO7733  
Forcipomyiinae|GMPJA8696-21|BIOUG66645-E03|BOLD:AAO7733  
Forcipomyiinae|GMPJA8737-21|BIOUG66645-H08|BOLD:AAO7733  
Forcipomyiinae|GMPJA8734-21|BIOUG66645-H05|BOLD:AAO7733  
Forcipomyiinae|GMPJA8755-21|BIOUG66646-B03|BOLD:AAO7733  
Forcipomyiinae|GMPJA8751-21|BIOUG66646-A11|BOLD:AAO7733  
Forcipomyiinae|GMPJA8818-21|BIOUG66646-G06|BOLD:AAO7733  
Forcipomyiinae|GMPJA8808-21|BIOUG66646-F08|BOLD:AAO7733  
Forcipomyiinae|GMPJA10286-21|BIOUG70233-A05|BOLD:AAO7733  
Forcipomyiinae|GMPJA10282-21|BIOUG70233-A01|BOLD:AAO7733  
Forcipomyiinae|GMPJA10188-21|BIOUG70232-A02|BOLD:AAO7733  
Forcipomyiinae|GMPJA10649-21|BIOUG70236-G11|BOLD:AAO7733  
Forcipomyiinae|GMPJA2250-21|BIOUG65679-B04|BOLD:AAO7733  
Forcipomyiinae|GMPJA8101-21|BIOUG66639-C02|BOLD:AAO7733  
Forcipomyiinae|GMPJA8512-21|BIOUG66643-E09|BOLD:AAO7733  
Forcipomyiinae|GMPJA8508-21|BIOUG66643-E05|BOLD:AAO7733  
Forcipomyiinae|GMPJA8667-21|BIOUG66645-B10|BOLD:AAO7733  
Forcipomyiinae|GMPJA8666-21|BIOUG66645-B09|BOLD:AAO7733  
Forcipomyiinae|GMPJA8720-21|BIOUG66645-G03|BOLD:AAO7733  
Forcipomyiinae|GMPJA8703-21|BIOUG66645-E10|BOLD:AAO7733  
Forcipomyiinae|GMPJA8750-21|BIOUG66646-A10|BOLD:AAO7733  
Forcipomyiinae|GMPJA8748-21|BIOUG66646-A08|BOLD:AAO7733  
Forcipomyiinae|GMPJA8798-21|BIOUG66646-E10|BOLD:AAO7733  
Forcipomyiinae|GMPJA8795-21|BIOUG66646-E07|BOLD:AAO7733  
Forcipomyiinae|GMPJA10247-21|BIOUG70232-F01|BOLD:AAO7733  
Forcipomyiinae|GMPJA10246-21|BIOUG70232-E12|BOLD:AAO7733  
Forcipomyiinae|GMPJA2049-21|BIOUG65677-A05|BOLD:AAO7733  
Forcipomyiinae|GMPJA1995-21|BIOUG65676-D10|BOLD:AAO7733  
Forcipomyiinae|GMPJA3031-21|BIOUG65686-H02|BOLD:AAO7733  
Forcipomyiinae|GMPJA4574-21|BIOUG66603-B02|BOLD:AAO7733  
Forcipomyiinae|GMPJA8510-21|BIOUG66643-E07|BOLD:AAO7733  
Forcipomyiinae|GMPJA3692-21|BIOUG65693-G10|BOLD:AAO7733  
Forcipomyiinae|GMPJA6289-21|BIOUG66620-B07|BOLD:AAO7733  
Forcipomyiinae|GMPJA5234-21|BIOUG66609-A09|BOLD:AAO7733  
Forcipomyiinae|GMPJA8628-21|BIOUG66644-G06|BOLD:AAO7733  
Forcipomyiinae|GMPJA8620-21|BIOUG66644-F10|BOLD:AAO7733  
Forcipomyiinae|GMPJA1774-21|BIOUG65674-B03|BOLD:AAO7733  
Forcipomyiinae|GMPJA1731-21|BIOUG65673-F07|BOLD:AAO7733  
Forcipomyiinae|GMPJA8744-21|BIOUG66646-A04|BOLD:AAO7733  
Forcipomyiinae|GMPJA8743-21|BIOUG66646-A03|BOLD:AAO7733  
Forcipomyiinae|GMPJA8807-21|BIOUG66646-F07|BOLD:AAO7733  
Forcipomyiinae|GMPJA8805-21|BIOUG66646-F05|BOLD:AAO7733  
Forcipomyiinae|GMPJA10355-21|BIOUG70233-G02|BOLD:AAO7733  
Forcipomyiinae|GMPJA10309-21|BIOUG70233-C04|BOLD:AAO7733  
Forcipomyiinae|GMPJA10226-21|BIOUG70232-D04|BOLD:AAO7733  
Forcipomyiinae|GMPJA10207-21|BIOUG70232-B09|BOLD:AAO7733  
Forcipomyiinae|GMPJA1560-21|BIOUG65671-H02|BOLD:AAO7733  
Forcipomyiinae|GMPJA1511-21|BIOUG65671-D01|BOLD:AAO7733  
Forcipomyiinae|GMPJA7855-21|BIOUG66636-F05|BOLD:AAO7733  
Forcipomyiinae|GMPJA7974-21|BIOUG66637-H05|BOLD:AAO7733  
Forcipomyiinae|GMPJA8474-21|BIOUG66643-B07|BOLD:AAO7733  
Forcipomyiinae|GMPJA7694-21|BIOUG66634-H10|BOLD:AAO7733  
Forcipomyiinae|GMPJA7403-21|BIOUG66631-H04|BOLD:AAO7733  
Forcipomyiinae|GMPJA2507-21|BIOUG65681-G11|BOLD:AAO7733  
Forcipomyiinae|GMPJA7474-21|BIOUG66632-F04|BOLD:AAO7733  
Forcipomyiinae|GMPJA7313-21|BIOUG66630-H09|BOLD:AAO7733  
Forcipomyiinae|GMPJA7558-21|BIOUG66633-E05|BOLD:AAO7733  
Forcipomyiinae|GMPJA8035-21|BIOUG66638-E07|BOLD:AAO7733  
Forcipomyiinae|GMPJA8094-21|BIOUG66639-B07|BOLD:AAO7733  
Forcipomyiinae|GMPJA7644-21|BIOUG66634-D08|BOLD:AAO7733  
Forcipomyiinae|GMPJA8475-21|BIOUG66643-B08|BOLD:AAO7733  
Forcipomyiinae|GMPJA8410-21|BIOUG66642-E02|BOLD:AAO7733  
Forcipomyiinae|GMPJA8777-21|BIOUG66646-D01|BOLD:AAO7733  
Forcipomyiinae|GMPJA8766-21|BIOUG66646-C02|BOLD:AAO7733  
Forcipomyiinae|GMPJA10212-21|BIOUG70232-C02|BOLD:AAO7733  
Forcipomyiinae|GMPJA8821-21|BIOUG66646-G09|BOLD:AAO7733  
Forcipomyiinae|GMPJA10630-21|BIOUG70236-F04|BOLD:AAO7733  
Forcipomyiinae|GMPJA10359-21|BIOUG70233-G06|BOLD:AAO7733  
Forcipomyiinae|GMPJA2072-21|BIOUG65677-C04|BOLD:AAO7733  
Forcipomyiinae|GMPJA2065-21|BIOUG65677-B09|BOLD:AAO7733  
Forcipomyiinae|GMPJA7737-21|BIOUG66635-D06|BOLD:AAO7733  
Forcipomyiinae|GMPJA8116-21|BIOUG66639-D05|BOLD:AAO7733  
Forcipomyiinae|GMPJA8586-21|BIOUG66644-C12|BOLD:AAO7733  
Forcipomyiinae|GMPJA7237-21|BIOUG66630-B05|BOLD:AAO7733  
Forcipomyiinae|GMPJA7681-21|BIOUG66634-G09|BOLD:AAO7733  
Forcipomyiinae|GMPJA7640-21|BIOUG66634-D04|BOLD:AAO7733  
Forcipomyiinae|GMPJA8018-21|BIOUG66638-D02|BOLD:AAO7733  
Forcipomyiinae|GMPJA7764-21|BIOUG66635-F09|BOLD:AAO7733  
Forcipomyiinae|GMPJA7740-21|BIOUG66635-D09|BOLD:AAO7733  
Forcipomyiinae|GMPJA7948-21|BIOUG66637-F03|BOLD:AAO7733  
Forcipomyiinae|GMPJA7798-21|BIOUG66636-A08|BOLD:AAO7733  
Forcipomyiinae|GMPJA8199-21|BIOUG66640-C05|BOLD:AAO7733  
Forcipomyiinae|GMPJA8577-21|BIOUG66644-C03|BOLD:AAO7733  
Forcipomyiinae|GMPJA8286-21|BIOUG66641-B09|BOLD:AAO7733  
Forcipomyiinae|GMPJA8251-21|BIOUG66640-G09|BOLD:AAO7733  
Forcipomyiinae|GMPJA7396-21|BIOUG66631-G09|BOLD:AAO7733  
Forcipomyiinae|GMPJA7380-21|BIOUG66631-F05|BOLD:AAO7733  
Forcipomyiinae|GMPJA8382-21|BIOUG66642-B10|BOLD:AAO7733  
Forcipomyiinae|GMPJA8296-21|BIOUG66641-C07|BOLD:AAO7733  
Forcipomyiinae|GMPJA7433-21|BIOUG66632-B11|BOLD:AAO7733  
Forcipomyiinae|GMPJA7425-21|BIOUG66632-B03|BOLD:AAO7733  
Forcipomyiinae|GMPJA8470-21|BIOUG66643-B03|BOLD:AAO7733  
Forcipomyiinae|GMPJA8779-21|BIOUG66646-D03|BOLD:AAO7733  
Forcipomyiinae|GMPJA8816-21|BIOUG66646-G04|BOLD:AAO7733  
Forcipomyiinae|GMPJA3146-21|BIOUG65688-A11|BOLD:AAO7733  
Forcipomyiinae|GMPJA5163-21|BIOUG66608-C09|BOLD:AAO7733  
Forcipomyiinae|GMPJA10661-21|BIOUG70236-H11|BOLD:AAO7733  
Forcipomyiinae|GMPJA6762-21|BIOUG66625-B05|BOLD:AAO7733  
Forcipomyiinae|GMPJA8054-21|BIOUG66638-G02|BOLD:AAO7733  
Forcipomyiinae|GMPJA7714-21|BIOUG66633-A06|BOLD:AAO7733

Forcipomyiinae|GMPJA1001-21|BIOUG70230-F11|BOLD:AAO7733  
 Forcipomyiinae|GMPJA6762-21|BIOUG66625-B05|BOLD:AAO7733  
 Forcipomyiinae|GMPJA8054-21|BIOUG66638-G02|BOLD:AAO7733  
 Forcipomyiinae|GMPJA7416-21|BIOUG66632-A06|BOLD:AAO7733  
 Forcipomyiinae|GMPJA7985-21|BIOUG66638-A05|BOLD:AAO7733  
 Forcipomyiinae|GMPJA8246-21|BIOUG66640-G04|BOLD:AAO7733  
 Forcipomyiinae|GMPJA8364-21|BIOUG66642-A04|BOLD:AAO7733  
 Forcipomyiinae|GMPJA8618-21|BIOUG66644-F08|BOLD:AAO7733  
 Forcipomyiinae|GMPJA8617-21|BIOUG66644-F07|BOLD:AAO7733  
 Forcipomyiinae|GMPJA8615-21|BIOUG66644-F05|BOLD:AAO7733  
 Forcipomyiinae|GMPJA7785-21|BIOUG66635-H06|BOLD:AAO7733  
 Forcipomyiinae|GMPJA7428-21|BIOUG66632-B06|BOLD:AAO7733  
 Forcipomyiinae|GMPJA5511-21|BIOUG66612-A01|BOLD:AAO7733  
 Forcipomyiinae|GMPJA8680-21|BIOUG66645-C11|BOLD:AAO7733  
 Forcipomyiinae|GMPJA8625-21|BIOUG66644-G03|BOLD:AAO7733  
 Forcipomyiinae|GMPJA1150-21|BIOUG65667-E08|BOLD:AAO7733  
 Forcipomyiinae|GMPJA8791-21|BIOUG66646-E03|BOLD:AAO7733  
 Forcipomyiinae|GMPJA2012-21|BIOUG65676-F03|BOLD:AAO7733  
 Forcipomyiinae|GMPJA2488-21|BIOUG65681-F04|BOLD:AAO7733  
 Forcipomyiinae|GMPJA8783-21|BIOUG66646-D07|BOLD:AAO7733  
 Forcipomyiinae|GMPJA8739-21|BIOUG66645-H10|BOLD:AAO7733  
 Forcipomyiinae|GMPJA8728-21|BIOUG66645-G11|BOLD:AAO7733  
 Forcipomyiinae|GMPJA8707-21|BIOUG66645-F02|BOLD:AAO7733  
 Forcipomyiinae|GMPJA7902-21|BIOUG66637-B05|BOLD:AAO7733  
 Forcipomyiinae|GMPJA7889-21|BIOUG66637-A04|BOLD:AAO7733  
 Forcipomyiinae|GMPJA7331-21|BIOUG66631-B04|BOLD:AAO7733  
 Forcipomyiinae|GMPJA7324-21|BIOUG66631-A09|BOLD:AAO7733  
 Forcipomyiinae|GMPJA7304-21|BIOUG66630-G12|BOLD:AAO7733  
 Forcipomyiinae|GMPJA7289-21|BIOUG66630-F09|BOLD:AAO7733  
 Forcipomyiinae|GMPJA7970-21|BIOUG66637-H01|BOLD:AAO7733  
 Forcipomyiinae|GMPJA7495-21|BIOUG66632-H01|BOLD:AAO7733  
 Forcipomyiinae|GMPJA7492-21|BIOUG66632-G10|BOLD:AAO7733  
 Forcipomyiinae|GMPJA7353-21|BIOUG66631-D02|BOLD:AAO7733  
 Forcipomyiinae|GMPJA7647-21|BIOUG66634-D11|BOLD:AAO7733  
 Forcipomyiinae|GMPJA7549-21|BIOUG66633-D08|BOLD:AAO7733  
 Forcipomyiinae|GMPJA8007-21|BIOUG66638-C03|BOLD:AAO7733  
 Forcipomyiinae|GMPJA7972-21|BIOUG66637-H03|BOLD:AAO7733  
 Forcipomyiinae|GMPJA8531-21|BIOUG66643-G04|BOLD:AAO7733  
 Forcipomyiinae|GMPJA8452-21|BIOUG66642-H08|BOLD:AAO7733  
 Forcipomyiinae|GMPJA8448-21|BIOUG66642-H04|BOLD:AAO7733  
 Forcipomyiinae|GMPJA8425-21|BIOUG66642-F05|BOLD:AAO7733  
 Forcipomyiinae|GMPJA8086-21|BIOUG66639-A11|BOLD:AAO7733  
 Forcipomyiinae|GMPJA8069-21|BIOUG66638-H05|BOLD:AAO7733  
 Forcipomyiinae|GMPJA8309-21|BIOUG66641-D08|BOLD:AAO7733  
 Forcipomyiinae|GMPJA7818-21|BIOUG66636-C04|BOLD:AAO7733  
 Forcipomyiinae|GMPJA7816-21|BIOUG66636-C02|BOLD:AAO7733  
 Forcipomyiinae|GMPJA7653-21|BIOUG66634-E05|BOLD:AAO7733  
 Forcipomyiinae|GMPJA4499-21|BIOUG66602-C10|BOLD:AAO7733  
 Forcipomyiinae|GMPJA10235-21|BIOUG70232-E01|BOLD:AAO7733  
 Forcipomyiinae|GMPJA10228-21|BIOUG70232-D06|BOLD:AAO7733  
 Forcipomyiinae|GMPJA3417-21|BIOUG65690-H08|BOLD:AAO7733  
 Forcipomyiinae|GMPJA8108-21|BIOUG66639-C09|BOLD:AAO7733  
 Forcipomyiinae|GMPJA8092-21|BIOUG66639-B05|BOLD:AAO7733  
 Forcipomyiinae|GMPJA8416-21|BIOUG66642-E08|BOLD:AAO7733  
 Forcipomyiinae|GMPJA8407-21|BIOUG66642-D11|BOLD:AAO7733  
 Forcipomyiinae|GMPJA8406-21|BIOUG66642-D10|BOLD:AAO7733  
 Forcipomyiinae|GMPJA8391-21|BIOUG66642-C07|BOLD:AAO7733  
 Forcipomyiinae|GMPJA8373-21|BIOUG66642-B01|BOLD:AAO7733  
 Forcipomyiinae|GMPJA8294-21|BIOUG66641-C05|BOLD:AAO7733  
 Forcipomyiinae|GMPJA8287-21|BIOUG66641-B10|BOLD:AAO7733  
 Forcipomyiinae|GMPJA8259-21|BIOUG66640-H05|BOLD:AAO7733  
 Forcipomyiinae|GMPJA8253-21|BIOUG66640-G11|BOLD:AAO7733  
 Forcipomyiinae|GMPJA8245-21|BIOUG66640-G03|BOLD:AAO7733  
 Forcipomyiinae|GMPJA8225-21|BIOUG66640-E07|BOLD:AAO7733  
 Forcipomyiinae|GMPJA8211-21|BIOUG66640-D05|BOLD:AAO7733  
 Forcipomyiinae|GMPJA8168-21|BIOUG66639-H09|BOLD:AAO7733  
 Forcipomyiinae|GMPJA8156-21|BIOUG66639-G09|BOLD:AAO7733  
 Forcipomyiinae|GMPJA8126-21|BIOUG66639-E03|BOLD:AAO7733  
 Forcipomyiinae|GMPJA8125-21|BIOUG66639-E02|BOLD:AAO7733  
 Forcipomyiinae|GMPJA1531-21|BIOUG65671-E09|BOLD:AAO7733  
 Forcipomyiinae|GMPJA1014-21|BIOUG65666-B03|BOLD:AAO7733  
 Forcipomyiinae|GMPJA3459-21|BIOUG65691-D03|BOLD:AAO7733  
 Forcipomyiinae|GMPJA4532-21|BIOUG66602-F07|BOLD:AAO7733  
 Forcipomyiinae|GMPJA8115-21|BIOUG66639-D04|BOLD:AAO7733  
 Forcipomyiinae|GMPJA8113-21|BIOUG66639-D02|BOLD:AAO7733  
 Forcipomyiinae|GMPJA8702-21|BIOUG66645-E09|BOLD:AAO7733  
 Forcipomyiinae|GMPJA8662-21|BIOUG66645-B05|BOLD:AAO7733  
 Forcipomyiinae|GMPJA8629-21|BIOUG66644-G07|BOLD:AAO7733  
 Forcipomyiinae|GMPJA8549-21|BIOUG66643-H10|BOLD:AAO7733  
 Forcipomyiinae|GMPJA8327-21|BIOUG66641-F02|BOLD:AAO7733  
 Forcipomyiinae|GMPJA8310-21|BIOUG66641-D09|BOLD:AAO7733  
 Forcipomyiinae|GMPJA7278-21|BIOUG66630-E10|BOLD:AAO7733  
 Forcipomyiinae|GMPJA7277-21|BIOUG66630-E09|BOLD:AAO7733  
 Forcipomyiinae|GMPJA7730-21|BIOUG66635-C11|BOLD:AAO7733  
 Forcipomyiinae|GMPJA7721-21|BIOUG66635-C02|BOLD:AAO7733  
 Forcipomyiinae|GMPJA7707-21|BIOUG66635-A12|BOLD:AAO7733  
 Forcipomyiinae|GMPJA7222-21|BIOUG66630-A02|BOLD:AAO7733  
 Forcipomyiinae|GMPJA6883-21|BIOUG66626-D07|BOLD:AAO7733  
 Forcipomyiinae|GMPJA7382-21|BIOUG66631-F07|BOLD:AAO7733  
 Forcipomyiinae|GMPJA6766-21|BIOUG66625-B09|BOLD:AAO7733  
 Forcipomyiinae|GMPJA6708-21|BIOUG66624-E10|BOLD:AAO7733  
 Forcipomyiinae|GMPJA6619-21|BIOUG66623-F04|BOLD:AAO7733  
 Forcipomyiinae|GMPJA6519-21|BIOUG66622-E11|BOLD:AAO7733  
 Forcipomyiinae|GMPJA6724-21|BIOUG66624-G02|BOLD:AAO7733  
 Forcipomyiinae|GMPJA6255-21|BIOUG66619-G08|BOLD:AAO7733  
 Forcipomyiinae|GMPJA1699-21|BIOUG65673-C11|BOLD:AAO7733  
 Forcipomyiinae|GMPJA2200-21|BIOUG65678-F01|BOLD:AAO7733  
 Forcipomyiinae|GMPJA2477-21|BIOUG65681-E05|BOLD:AAO7733  
 Forcipomyiinae|GMPJA8257-21|BIOUG66640-H03|BOLD:AAO7733  
 Forcipomyiinae|GMPJA8606-21|BIOUG66644-E08|BOLD:AAO7733  
 Forcipomyiinae|GMPJA8721-21|BIOUG66645-G04|BOLD:AAO7733  
 Forcipomyiinae|GMPJA8698-21|BIOUG66645-E05|BOLD:AAO7733  
 Forcipomyiinae|GMPJA2149-21|BIOUG65678-A10|BOLD:AAO7733



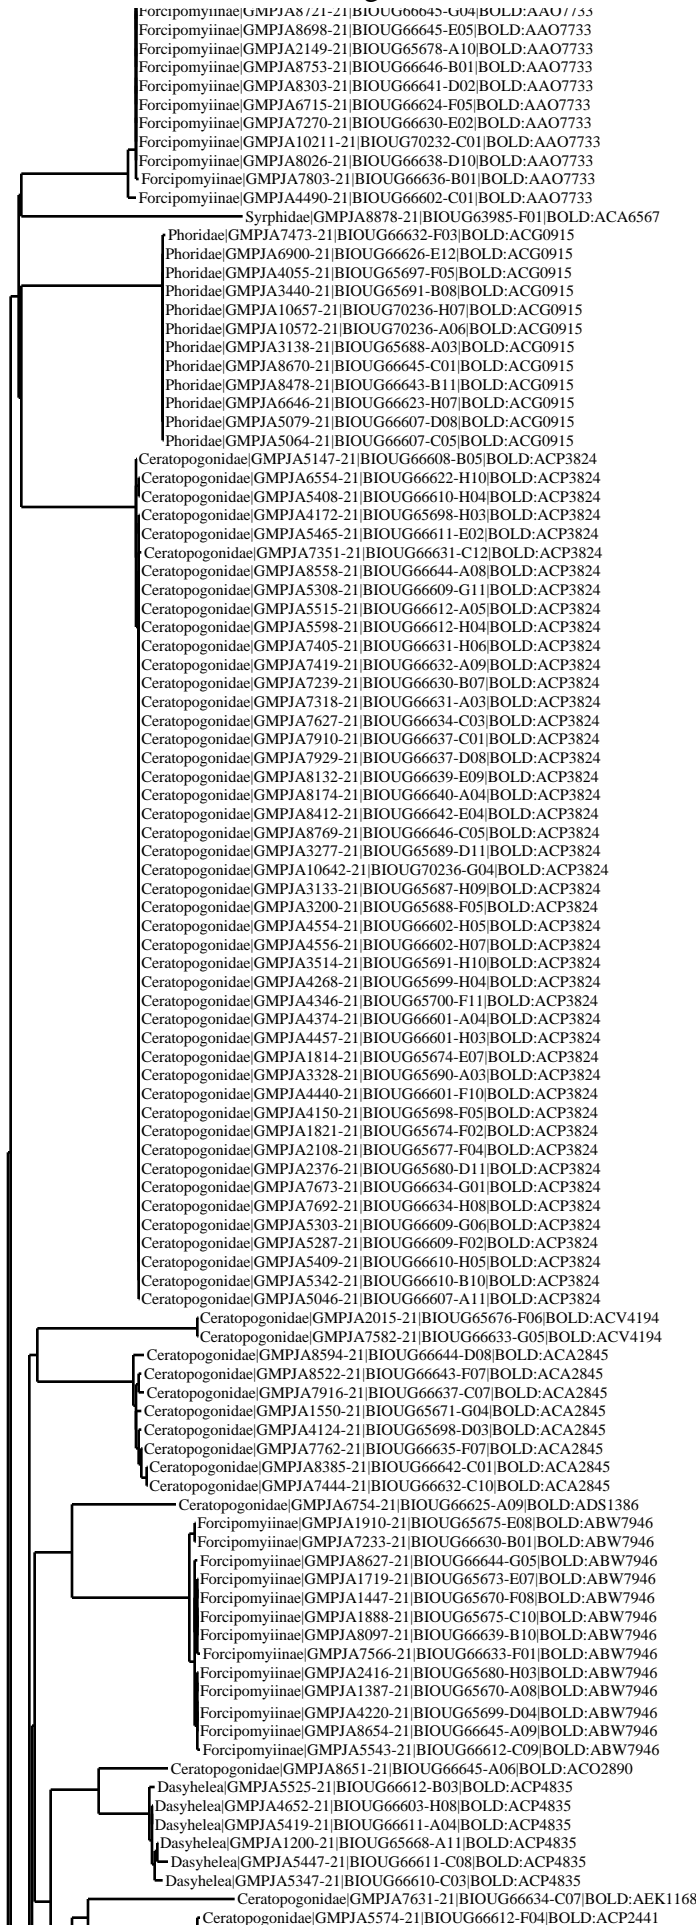

└ Dasyhelea|GMPJA5347-21|BIOUG66610-C03|BOLD:ACP4835  
└ Ceratopogonidae|GMPJA7631-21|BIOUG66634-C07|BOLD:AEK1168  
└ Ceratopogonidae|GMPJA5574-21|BIOUG66612-F04|BOLD:ACP2441  
└ Ceratopogonidae|GMPJA3044-21|BIOUG65687-A04|BOLD:ACP2441  
└ Ceratopogonidae|GMPJA6801-21|BIOUG66625-E08|BOLD:ACP2441  
└ Ceratopogonidae|GMPJA7462-21|BIOUG66632-E04|BOLD:ACP2441  
└ Ceratopogonidae|GMPJA7811-21|BIOUG66636-B09|BOLD:ACP2441  
└ Ceratopogonidae|GMPJA4082-21|BIOUG65697-H08|BOLD:ACP2441  
└ Ceratopogonidae|GMPJA3174-21|BIOUG65688-D03|BOLD:ACP2441  
└ Ceratopogonidae|GMPJA5112-21|BIOUG66607-G05|BOLD:ACP2441  
└ Ceratopogonidae|GMPJA7323-21|BIOUG66631-A08|BOLD:AEJ0752  
└ Ceratopogonidae|GMPJA8688-21|BIOUG66645-D07|BOLD:ACP4409  
└ Ceratopogonidae|GMPJA7727-21|BIOUG66635-C08|BOLD:ACP4192  
└ Ceratopogonidae|GMPJA7650-21|BIOUG66634-E02|BOLD:ACF8637  
└ Ceratopogonidae|GMPJA7440-21|BIOUG66632-C06|BOLD:ACF8637  
└ Ceratopogonidae|GMPJA8105-21|BIOUG66639-C06|BOLD:ACF8637  
└ Ceratopogonidae|GMPJA7939-21|BIOUG66637-E06|BOLD:ACF8637  
└ Ceratopogonidae|GMPJA7925-21|BIOUG66637-D04|BOLD:ACF8637  
└ Ceratopogonidae|GMPJA7890-21|BIOUG66637-A05|BOLD:ACF8637  
└ Ceratopogonidae|GMPJA7869-21|BIOUG66636-G07|BOLD:ACF8637  
└ Ceratopogonidae|GMPJA7547-21|BIOUG66633-D06|BOLD:ACF8637  
└ Ceratopogonidae|GMPJA7350-21|BIOUG66631-C11|BOLD:ACF8637  
└ Ceratopogonidae|GMPJA7328-21|BIOUG66631-B01|BOLD:ACF8637  
└ Ceratopogonidae|GMPJA7238-21|BIOUG66630-B06|BOLD:ACF8637  
└ Ceratopogonidae|GMPJA7682-21|BIOUG66634-G10|BOLD:ACF8637  
└ Ceratopogonidae|GMPJA8359-21|BIOUG66641-H10|BOLD:ACF8637  
└ Ceratopogonidae|GMPJA8240-21|BIOUG66640-F10|BOLD:ACF8637  
└ Ceratopogonidae|GMPJA8188-21|BIOUG66640-B06|BOLD:ACF8637  
└ Ceratopogonidae|GMPJA8107-21|BIOUG66639-C08|BOLD:ACF8637  
└ Ceratopogonidae|GMPJA8445-21|BIOUG66642-H01|BOLD:ACF8637  
└ Ceratopogonidae|GMPJA8427-21|BIOUG66642-F07|BOLD:ACF8637  
└ Ceratopogonidae|GMPJA8493-21|BIOUG66643-D02|BOLD:ACF8637  
└ Ceratopogonidae|GMPJA8486-21|BIOUG66643-C07|BOLD:ACF8637  
└ Ceratopogonidae|GMPJA8742-21|BIOUG66646-A02|BOLD:ACF8637  
└ Ceratopogonidae|GMPJA8555-21|BIOUG66644-A05|BOLD:ACF8637  
└ Ceratopogonidae|GMPJA8782-21|BIOUG66646-D06|BOLD:ACF8637  
└ Ceratopogonidae|GMPJA8775-21|BIOUG66646-C11|BOLD:ACF8637  
└ Ceratopogonidae|GMPJA9169-21|BIOUG66650-A04|BOLD:ACF8637  
└ Ceratopogonidae|GMPJA8789-21|BIOUG66646-E01|BOLD:ACF8637  
└ Ceratopogonidae|GMPJA10592-21|BIOUG70236-C02|BOLD:ACF8637  
└ Ceratopogonidae|GMPJA10593-21|BIOUG70236-C03|BOLD:ACF8637  
└ Ceratopogonidae|GMPJA203-21|BIOUG65657-E11|BOLD:ACF8637  
└ Ceratopogonidae|GMPJA446-21|BIOUG65660-B05|BOLD:ACF8637  
└ Ceratopogonidae|GMPJA1328-21|BIOUG65669-D08|BOLD:ACF8637  
└ Ceratopogonidae|GMPJA1199-21|BIOUG65668-A10|BOLD:ACF8637  
└ Ceratopogonidae|GMPJA1836-21|BIOUG65674-G05|BOLD:ACF8637  
└ Ceratopogonidae|GMPJA1549-21|BIOUG65671-G03|BOLD:ACF8637  
└ Ceratopogonidae|GMPJA1351-21|BIOUG65669-F07|BOLD:ACF8637  
└ Ceratopogonidae|GMPJA1009-21|BIOUG65666-A10|BOLD:ACF8637  
└ Ceratopogonidae|GMPJA10548-21|BIOUG70235-G05|BOLD:ACF8637  
└ Ceratopogonidae|GMPJA8806-21|BIOUG66646-F06|BOLD:ACF8637  
└ Ceratopogonidae|GMPJA8655-21|BIOUG66645-A10|BOLD:ACF8637  
└ Ceratopogonidae|GMPJA7868-21|BIOUG66636-G06|BOLD:ACF8637  
└ Ceratopogonidae|GMPJA7610-21|BIOUG66634-A10|BOLD:ACF8637  
└ Ceratopogonidae|GMPJA7978-21|BIOUG66637-H09|BOLD:ACF8637  
└ Ceratopogonidae|GMPJA6656-21|BIOUG66624-A06|BOLD:ACF8637  
└ Ceratopogonidae|GMPJA7436-21|BIOUG66632-C02|BOLD:ACF8637  
└ Ceratopogonidae|GMPJA6588-21|BIOUG66623-C09|BOLD:ACF8637  
└ Ceratopogonidae|GMPJA6714-21|BIOUG66624-F04|BOLD:ACF8637  
└ Ceratopogonidae|GMPJA6458-21|BIOUG66621-H09|BOLD:ACF8637  
└ Ceratopogonidae|GMPJA6875-21|BIOUG66626-C11|BOLD:ACF8637  
└ Ceratopogonidae|GMPJA7448-21|BIOUG66632-D02|BOLD:ACF8637  
└ Ceratopogonidae|GMPJA6440-21|BIOUG66621-G03|BOLD:ACF8637  
└ Ceratopogonidae|GMPJA5341-21|BIOUG66610-B09|BOLD:ACF8637  
└ Ceratopogonidae|GMPJA154-21|BIOUG65657-A10|BOLD:AEA1475  
└ Ceratopogonidae|GMPJA8037-21|BIOUG66638-E09|BOLD:ACV3267  
└ Ceratopogonidae|GMPJA8489-21|BIOUG66643-C10|BOLD:ACV3267  
└ Ceratopogonidae|GMPJA7967-21|BIOUG66637-G10|BOLD:ACV3267  
└ Ceratopogonidae|GMPJA7386-21|BIOUG66631-F11|BOLD:ACV3267  
└ Ceratopogonidae|GMPJA8656-21|BIOUG66645-A11|BOLD:ACR6834  
└ Ceratopogonidae|GMPJA7500-21|BIOUG66632-H06|BOLD:ACR6834  
└ Ceratopogonidae|GMPJA7660-21|BIOUG66634-E12|BOLD:ACR6834  
└ Ceratopogonidae|GMPJA7884-21|BIOUG66636-H10|BOLD:ACR6834  
└ Ceratopogonidae|GMPJA7662-21|BIOUG66634-F02|BOLD:ACR6834  
└ Ceratopogonidae|GMPJA7879-21|BIOUG66636-H05|BOLD:ACR6834  
└ Ceratopogonidae|GMPJA8315-21|BIOUG66641-E02|BOLD:ACR6834  
└ Ceratopogonidae|GMPJA7254-21|BIOUG66630-C10|BOLD:ACR6834  
└ Ceratopogonidae|GMPJA10316-21|BIOUG70233-C11|BOLD:ACR6834  
└ Ceratopogonidae|GMPJA8405-21|BIOUG66642-D09|BOLD:ACR6834  
└ Ceratopogonidae|GMPJA7971-21|BIOUG66637-H02|BOLD:ACR6834  
└ Ceratopogonidae|GMPJA7320-21|BIOUG66631-A05|BOLD:ACR6834  
└ Ceratopogonidae|GMPJA6902-21|BIOUG66626-F02|BOLD:ACR6834  
└ Ceratopogonidae|GMPJA6856-21|BIOUG66626-B04|BOLD:ACR6834  
└ Ceratopogonidae|GMPJA6412-21|BIOUG66621-D11|BOLD:ACR6834  
└ Ceratopogonidae|GMPJA6479-21|BIOUG66622-B07|BOLD:ACR6834  
└ Ceratopogonidae|GMPJA8797-21|BIOUG66646-E09|BOLD:ACR6834  
└ Ceratopogonidae|GMPJA8222-21|BIOUG66640-E04|BOLD:ACR6834  
└ Ceratopogonidae|GMPJA7835-21|BIOUG66636-D09|BOLD:ACR6834  
└ Ceratopogonidae|GMPJA8096-21|BIOUG66639-B09|BOLD:ACR6834  
└ Ceratopogonidae|GMPJA6726-21|BIOUG66624-G04|BOLD:ACR6834  
└ Ceratopogonidae|GMPJA8569-21|BIOUG66644-B07|BOLD:ACR6834  
└ Ceratopogonidae|GMPJA8229-21|BIOUG66640-E11|BOLD:ACR6834  
└ Ceratopogonidae|GMPJA7477-21|BIOUG66632-F07|BOLD:ACR6834  
└ Ceratopogonidae|GMPJA6644-21|BIOUG66623-H05|BOLD:ACR6834  
└ Ceratopogonidae|GMPJA7892-21|BIOUG66637-A07|BOLD:ACR6834  
└ Ceratopogonidae|GMPJA7471-21|BIOUG66632-F01|BOLD:ACR6834  
└ Ceratopogonidae|GMPJA7486-21|BIOUG66632-G04|BOLD:ACR6834  
└ Ceratopogonidae|GMPJA7526-21|BIOUG66633-B09|BOLD:ACR6834  
└ Ceratopogonidae|GMPJA8036-21|BIOUG66638-E08|BOLD:ACR6834  
└ Ceratopogonidae|GMPJA7546-21|BIOUG66633-D05|BOLD:ACR6834  
└ Ceratopogonidae|GMPJA7604-21|BIOUG66634-A04|BOLD:ACR6834  
└ Ceratopogonidae|GMPJA7674-21|BIOUG66634-G02|BOLD:ACR6834  
└ Ceratopogonidae|GMPJA7756-21|BIOUG66635-F01|BOLD:ACR6834

Ceratopogonidae|GMPJA7604-21|BIOUG66634-A04|BOLD:ACR6834  
 Ceratopogonidae|GMPJA7674-21|BIOUG66634-G02|BOLD:ACR6834  
 Ceratopogonidae|GMPJA7756-21|BIOUG66635-F01|BOLD:ACR6834  
 Ceratopogonidae|GMPJA7938-21|BIOUG66637-E05|BOLD:ACR6834  
 Ceratopogonidae|GMPJA8418-21|BIOUG66642-E10|BOLD:ACR6834  
 Ceratopogonidae|GMPJA8434-21|BIOUG66642-G02|BOLD:ACR6834  
 Ceratopogonidae|GMPJA8435-21|BIOUG66642-G03|BOLD:ACR6834  
 Ceratopogonidae|GMPJA7464-21|BIOUG66632-E06|BOLD:ACR6834  
 Ceratopogonidae|GMPJA7288-21|BIOUG66630-F08|BOLD:ACR6834  
 Ceratopogonidae|GMPJA7229-21|BIOUG66630-A09|BOLD:ACR6834  
 Ceratopogonidae|GMPJA7736-21|BIOUG66635-D05|BOLD:ACR6834  
 Ceratopogonidae|GMPJA6447-21|BIOUG66621-G10|BOLD:ACR6834  
 Ceratopogonidae|GMPJA6384-21|BIOUG66621-B07|BOLD:ACR6834  
 Ceratopogonidae|GMPJA6618-21|BIOUG66623-F03|BOLD:ACR6834  
 Ceratopogonidae|GMPJA7973-21|BIOUG66637-H04|BOLD:ACR6834  
 Ceratopogonidae|GMPJA7901-21|BIOUG66637-B04|BOLD:ACR6834  
 Ceratopogonidae|GMPJA8599-21|BIOUG66644-E01|BOLD:ACR6834  
 Ceratopogonidae|GMPJA8191-21|BIOUG66640-B09|BOLD:ACR6834  
 Ceratopogonidae|GMPJA8505-21|BIOUG66643-E02|BOLD:ACR6834  
 Ceratopogonidae|GMPJA8547-21|BIOUG66643-H08|BOLD:ACR6834  
 Ceratopogonidae|GMPJA8817-21|BIOUG66646-G05|BOLD:ACR6834  
 Ceratopogonidae|GMPJA7559-21|BIOUG66633-E06|BOLD:ACR6834  
 Ceratopogonidae|GMPJA5246-21|BIOUG66609-B09|BOLD:ACR6834  
 Ceratopogonidae|GMPJA8520-21|BIOUG66643-F05|BOLD:AEK7036  
 Ceratopogonidae|GMPJA8633-21|BIOUG66644-G11|BOLD:ABY0150  
 Ceratopogonidae|GMPJA4588-21|BIOUG66603-C04|BOLD:ABY0150  
 Ceratopogonidae|GMPJA3294-21|BIOUG65689-F04|BOLD:ABY0150  
 Ceratopogonidae|GMPJA8814-21|BIOUG66646-G02|BOLD:ABY0150  
 Ceratopogonidae|GMPJA8812-21|BIOUG66646-F12|BOLD:ABY0150  
 Ceratopogonidae|GMPJA8726-21|BIOUG66645-G09|BOLD:ABY0150  
 Ceratopogonidae|GMPJA8560-21|BIOUG66644-A10|BOLD:ABY0150  
 Ceratopogonidae|GMPJA8553-21|BIOUG66644-A03|BOLD:ABY0150  
 Ceratopogonidae|GMPJA8386-21|BIOUG66642-C02|BOLD:ABY0150  
 Ceratopogonidae|GMPJA2341-21|BIOUG65680-A12|BOLD:ABY0150  
 Ceratopogonidae|GMPJA1562-21|BIOUG65671-H04|BOLD:ABY0150  
 Ceratopogonidae|GMPJA1443-21|BIOUG65670-F04|BOLD:ABY0150  
 Ceratopogonidae|GMPJA1402-21|BIOUG65670-B11|BOLD:ABY0150  
 Ceratopogonidae|GMPJA8215-21|BIOUG66640-D09|BOLD:ABY0150  
 Ceratopogonidae|GMPJA8607-21|BIOUG66644-E09|BOLD:ABY0150  
 Ceratopogonidae|GMPJA8151-21|BIOUG66639-G04|BOLD:ABY0150  
 Ceratopogonidae|GMPJA8140-21|BIOUG66639-F05|BOLD:ABY0150  
 Ceratopogonidae|GMPJA7919-21|BIOUG66637-C10|BOLD:ABY0150  
 Ceratopogonidae|GMPJA7883-21|BIOUG66636-H09|BOLD:ABY0150  
 Ceratopogonidae|GMPJA7864-21|BIOUG66636-G02|BOLD:ABY0150  
 Ceratopogonidae|GMPJA7804-21|BIOUG66636-B02|BOLD:ABY0150  
 Ceratopogonidae|GMPJA7639-21|BIOUG66634-D03|BOLD:ABY0150  
 Ceratopogonidae|GMPJA7608-21|BIOUG66634-A08|BOLD:ABY0150  
 Ceratopogonidae|GMPJA1350-21|BIOUG65669-F06|BOLD:ABY0150  
 Ceratopogonidae|GMPJA3546-21|BIOUG65692-C07|BOLD:ABY0150  
 Ceratopogonidae|GMPJA4508-21|BIOUG66602-D07|BOLD:ABY0150  
 Ceratopogonidae|GMPJA10259-21|BIOUG70232-G01|BOLD:ABY0150  
 Ceratopogonidae|GMPJA8048-21|BIOUG66638-F08|BOLD:ABY0150  
 Ceratopogonidae|GMPJA8022-21|BIOUG66638-D06|BOLD:ABY0150  
 Ceratopogonidae|GMPJA7537-21|BIOUG66633-C08|BOLD:ABY0150  
 Ceratopogonidae|GMPJA7225-21|BIOUG66630-A05|BOLD:ABY0150  
 Ceratopogonidae|GMPJA7365-21|BIOUG66631-E02|BOLD:ABY0150  
 Ceratopogonidae|GMPJA6765-21|BIOUG66625-B08|BOLD:ABY0150  
 Ceratopogonidae|GMPJA3333-21|BIOUG65690-A08|BOLD:ACP3998  
 Ceratopogonidae|GMPJA10575-21|BIOUG70236-A09|BOLD:ACP3998  
 Ceratopogonidae|GMPJA3127-21|BIOUG65687-H03|BOLD:ACP3998  
 Ceratopogonidae|GMPJA4135-21|BIOUG65698-E02|BOLD:ACP3998  
 Ceratopogonidae|GMPJA3490-21|BIOUG65691-F10|BOLD:ACP3998  
 Ceratopogonidae|GMPJA6183-21|BIOUG66619-A08|BOLD:ACP3998  
 Ceratopogonidae|GMPJA4582-21|BIOUG66603-B10|BOLD:ABX2129  
 Ceratopogonidae|GMPJA8400-21|BIOUG66642-D04|BOLD:ABX2129  
 Ceratopogonidae|GMPJA8133-21|BIOUG66639-E10|BOLD:ABX2129  
 Ceratopogonidae|GMPJA1398-21|BIOUG65670-B07|BOLD:ABX2129  
 Ceratopogonidae|GMPJA3096-21|BIOUG65687-E08|BOLD:ABX2129  
 Ceratopogonidae|GMPJA7485-21|BIOUG66632-G03|BOLD:ABX2129  
 Ceratopogonidae|GMPJA1388-21|BIOUG65670-A09|BOLD:ABX2129  
 Ceratopogonidae|GMPJA1796-21|BIOUG65674-D01|BOLD:ABX2129  
 Ceratopogonidae|GMPJA1299-21|BIOUG65669-B03|BOLD:ABX2129  
 Ceratopogonidae|GMPJA3995-21|BIOUG65697-A05|BOLD:ABX2129  
 Ceratopogonidae|GMPJA3632-21|BIOUG65693-B10|BOLD:ABX2129  
 Ceratopogonidae|GMPJA3406-21|BIOUG65690-G09|BOLD:ABX2129  
 Ceratopogonidae|GMPJA8181-21|BIOUG66640-A11|BOLD:ABX2129  
 Ceratopogonidae|GMPJA4109-21|BIOUG65698-B12|BOLD:ABX2129  
 Ceratopogonidae|GMPJA1465-21|BIOUG65670-H02|BOLD:ABX2129  
 Ceratopogonidae|GMPJA3218-21|BIOUG65688-G11|BOLD:ABX2129  
 Ceratopogonidae|GMPJA7443-21|BIOUG66632-C09|BOLD:ABX2129  
 Ceratopogonidae|GMPJA7373-21|BIOUG66631-E10|BOLD:ABX2129  
 Ceratopogonidae|GMPJA3997-21|BIOUG65697-A07|BOLD:ABX2129  
 Ceratopogonidae|GMPJA2300-21|BIOUG65679-F06|BOLD:ABX2129  
 Ceratopogonidae|GMPJA1798-21|BIOUG65674-D03|BOLD:ABX2129  
 Ceratopogonidae|GMPJA8001-21|BIOUG66638-B09|BOLD:ABX2129  
 Ceratopogonidae|GMPJA10213-21|BIOUG70232-C03|BOLD:ABX2129  
 Ceratopogonidae|GMPJA1658-21|BIOUG65672-H05|BOLD:ABX2129  
 Ceratopogonidae|GMPJA7301-21|BIOUG66630-G09|BOLD:ABX2129  
 Ceratopogonidae|GMPJA1868-21|BIOUG65675-B02|BOLD:ABX2129  
 Ceratopogonidae|GMPJA3235-21|BIOUG65689-A05|BOLD:ABX2129  
 Ceratopogonidae|GMPJA7456-21|BIOUG66632-D10|BOLD:ABX2129  
 Ceratopogonidae|GMPJA3567-21|BIOUG65692-E04|BOLD:ABX2129  
 Ceratopogonidae|GMPJA3299-21|BIOUG65689-F09|BOLD:ABX2129  
 Ceratopogonidae|GMPJA4235-21|BIOUG65699-E07|BOLD:ABX2129  
 Ceratopogonidae|GMPJA3590-21|BIOUG65692-G03|BOLD:ABX2129  
 Ceratopogonidae|GMPJA7401-21|BIOUG66631-H02|BOLD:ABX2129  
 Ceratopogonidae|GMPJA7776-21|BIOUG66635-G09|BOLD:ABX2129  
 Ceratopogonidae|GMPJA3190-21|BIOUG65688-E07|BOLD:ABX2129  
 Ceratopogonidae|GMPJA3251-21|BIOUG65689-B09|BOLD:ABX2129  
 Ceratopogonidae|GMPJA3581-21|BIOUG65692-F06|BOLD:ABX2129  
 Ceratopogonidae|GMPJA3663-21|BIOUG65693-E05|BOLD:ABX2129  
 Ceratopogonidae|GMPJA1346-21|BIOUG65669-F02|BOLD:ABX2129  
 Ceratopogonidae|GMPJA7750-21|BIOUG66635-E07|BOLD:ABX2129

Ceratopogonidae|GMPJA3663-21|BIOUG65693-E05|BOLD:ABX2129  
 Ceratopogonidae|GMPJA1346-21|BIOUG65669-F02|BOLD:ABX2129  
 Ceratopogonidae|GMPJA7750-21|BIOUG66635-E07|BOLD:ABX2129  
 Ceratopogonidae|GMPJA1912-21|BIOUG65675-E10|BOLD:ABX2129  
 Ceratopogonidae|GMPJA8065-21|BIOUG66638-H01|BOLD:ABX2129  
 Ceratopogonidae|GMPJA7628-21|BIOUG66634-C04|BOLD:ABX2129  
 Ceratopogonidae|GMPJA8345-21|BIOUG66641-G08|BOLD:ABX2129  
 Ceratopogonidae|GMPJA7852-21|BIOUG66636-F02|BOLD:ABX2129  
 Ceratopogonidae|GMPJA7950-21|BIOUG66637-F05|BOLD:ABX2129  
 Ceratopogonidae|GMPJA8091-21|BIOUG66639-B04|BOLD:ABX2129  
 Ceratopogonidae|GMPJA8216-21|BIOUG66640-D10|BOLD:ABX2129  
 Ceratopogonidae|GMPJA3466-21|BIOUG65691-D10|BOLD:ABX2129  
 Ceratopogonidae|GMPJA8559-21|BIOUG66644-A09|BOLD:ABX2129  
 Ceratopogonidae|GMPJA8565-21|BIOUG66644-B03|BOLD:ABX2129  
 Ceratopogonidae|GMPJA8616-21|BIOUG66644-F06|BOLD:ABX2129  
 Ceratopogonidae|GMPJA8685-21|BIOUG66645-D04|BOLD:ABX2129  
 Ceratopogonidae|GMPJA8738-21|BIOUG66645-H09|BOLD:ABX2129  
 Ceratopogonidae|GMPJA8745-21|BIOUG66646-A05|BOLD:ABX2129  
 Ceratopogonidae|GMPJA10285-21|BIOUG70233-A04|BOLD:ABX2129  
 Ceratopogonidae|GMPJA3112-21|BIOUG65687-F12|BOLD:ABX2129  
 Ceratopogonidae|GMPJA3125-21|BIOUG65687-H01|BOLD:ABX2129  
 Ceratopogonidae|GMPJA3222-21|BIOUG65688-H03|BOLD:ABX2129  
 Ceratopogonidae|GMPJA3293-21|BIOUG65689-F03|BOLD:ABX2129  
 Ceratopogonidae|GMPJA10627-21|BIOUG70236-F01|BOLD:ABX2129  
 Ceratopogonidae|GMPJA4576-21|BIOUG66603-B04|BOLD:ABX2129  
 Ceratopogonidae|GMPJA3062-21|BIOUG65687-B10|BOLD:ABX2129  
 Ceratopogonidae|GMPJA10323-21|BIOUG70233-D06|BOLD:ABX2129  
 Ceratopogonidae|GMPJA3227-21|BIOUG65688-H08|BOLD:ABX2129  
 Ceratopogonidae|GMPJA3666-21|BIOUG65693-E08|BOLD:ABX2129  
 Ceratopogonidae|GMPJA3668-21|BIOUG65693-E10|BOLD:ABX2129  
 Ceratopogonidae|GMPJA3672-21|BIOUG65693-F02|BOLD:ABX2129  
 Ceratopogonidae|GMPJA4462-21|BIOUG66601-H08|BOLD:ABX2129  
 Ceratopogonidae|GMPJA4468-21|BIOUG66602-A03|BOLD:ABX2129  
 Ceratopogonidae|GMPJA3263-21|BIOUG65689-C09|BOLD:ABX2129  
 Ceratopogonidae|GMPJA3297-21|BIOUG65689-F07|BOLD:ABX2129  
 Ceratopogonidae|GMPJA10554-21|BIOUG70235-G11|BOLD:ABX2129  
 Ceratopogonidae|GMPJA3341-21|BIOUG65690-B04|BOLD:ABX2129  
 Ceratopogonidae|GMPJA3487-21|BIOUG65691-F07|BOLD:ABX2129  
 Ceratopogonidae|GMPJA3491-21|BIOUG65691-F11|BOLD:ABX2129  
 Ceratopogonidae|GMPJA4272-21|BIOUG65699-H08|BOLD:ABX2129  
 Ceratopogonidae|GMPJA4280-21|BIOUG65700-A05|BOLD:ABX2129  
 Ceratopogonidae|GMPJA4314-21|BIOUG65700-D03|BOLD:ABX2129  
 Ceratopogonidae|GMPJA4393-21|BIOUG66601-B11|BOLD:ABX2129  
 Ceratopogonidae|GMPJA4415-21|BIOUG66601-D09|BOLD:ABX2129  
 Ceratopogonidae|GMPJA3525-21|BIOUG65692-A10|BOLD:ABX2129  
 Ceratopogonidae|GMPJA3547-21|BIOUG65692-C08|BOLD:ABX2129  
 Ceratopogonidae|GMPJA3566-21|BIOUG65692-E03|BOLD:ABX2129  
 Ceratopogonidae|GMPJA3568-21|BIOUG65692-E05|BOLD:ABX2129  
 Ceratopogonidae|GMPJA3572-21|BIOUG65692-E09|BOLD:ABX2129  
 Ceratopogonidae|GMPJA3606-21|BIOUG65692-H07|BOLD:ABX2129  
 Ceratopogonidae|GMPJA3608-21|BIOUG65692-H09|BOLD:ABX2129  
 Ceratopogonidae|GMPJA3648-21|BIOUG65693-D02|BOLD:ABX2129  
 Ceratopogonidae|GMPJA3661-21|BIOUG65693-E03|BOLD:ABX2129  
 Ceratopogonidae|GMPJA4034-21|BIOUG65697-D08|BOLD:ABX2129  
 Ceratopogonidae|GMPJA4036-21|BIOUG65697-D10|BOLD:ABX2129  
 Ceratopogonidae|GMPJA4046-21|BIOUG65697-E08|BOLD:ABX2129  
 Ceratopogonidae|GMPJA4106-21|BIOUG65698-B09|BOLD:ABX2129  
 Ceratopogonidae|GMPJA4143-21|BIOUG65698-E10|BOLD:ABX2129  
 Ceratopogonidae|GMPJA4169-21|BIOUG65698-G12|BOLD:ABX2129  
 Ceratopogonidae|GMPJA920-21|BIOUG65665-B04|BOLD:ABX2129  
 Ceratopogonidae|GMPJA1298-21|BIOUG65669-B02|BOLD:ABX2129  
 Ceratopogonidae|GMPJA1051-21|BIOUG65666-E04|BOLD:ABX2129  
 Ceratopogonidae|GMPJA1376-21|BIOUG65669-H08|BOLD:ABX2129  
 Ceratopogonidae|GMPJA1876-21|BIOUG65675-B10|BOLD:ABX2129  
 Ceratopogonidae|GMPJA1445-21|BIOUG65670-F06|BOLD:ABX2129  
 Ceratopogonidae|GMPJA1566-21|BIOUG65671-H08|BOLD:ABX2129  
 Ceratopogonidae|GMPJA1603-21|BIOUG65672-C10|BOLD:ABX2129  
 Ceratopogonidae|GMPJA2210-21|BIOUG65678-F11|BOLD:ABX2129  
 Ceratopogonidae|GMPJA2225-21|BIOUG65678-H02|BOLD:ABX2129  
 Ceratopogonidae|GMPJA2287-21|BIOUG65679-E05|BOLD:ABX2129  
 Ceratopogonidae|GMPJA2302-21|BIOUG65679-F08|BOLD:ABX2129  
 Ceratopogonidae|GMPJA2360-21|BIOUG65680-C07|BOLD:ABX2129  
 Ceratopogonidae|GMPJA1652-21|BIOUG65672-G11|BOLD:ABX2129  
 Ceratopogonidae|GMPJA1671-21|BIOUG65673-A07|BOLD:ABX2129  
 Ceratopogonidae|GMPJA1698-21|BIOUG65673-C10|BOLD:ABX2129  
 Ceratopogonidae|GMPJA1708-21|BIOUG65673-D08|BOLD:ABX2129  
 Ceratopogonidae|GMPJA2026-21|BIOUG65676-G05|BOLD:ABX2129  
 Ceratopogonidae|GMPJA2054-21|BIOUG65677-A10|BOLD:ABX2129  
 Ceratopogonidae|GMPJA2096-21|BIOUG65677-E04|BOLD:ABX2129  
 Ceratopogonidae|GMPJA2116-21|BIOUG65677-F12|BOLD:ABX2129  
 Ceratopogonidae|GMPJA3311-21|BIOUG65689-G09|BOLD:ABX2129  
 Ceratopogonidae|GMPJA7913-21|BIOUG66637-C04|BOLD:ABX2129  
 Ceratopogonidae|GMPJA4303-21|BIOUG65700-C04|BOLD:ABX2129  
 Ceratopogonidae|GMPJA2001-21|BIOUG65676-E04|BOLD:ABX2129  
 Ceratopogonidae|GMPJA4506-21|BIOUG66602-D05|BOLD:ABX2129  
 Ceratopogonidae|GMPJA8060-21|BIOUG66638-G08|BOLD:ABX2129  
 Ceratopogonidae|GMPJA8059-21|BIOUG66638-G07|BOLD:ABX2129  
 Ceratopogonidae|GMPJA7343-21|BIOUG66631-C04|BOLD:ABX2129  
 Ceratopogonidae|GMPJA7299-21|BIOUG66630-G07|BOLD:ABX2129  
 Ceratopogonidae|GMPJA7247-21|BIOUG66630-C03|BOLD:ABX2129  
 Ceratopogonidae|GMPJA7390-21|BIOUG66631-G03|BOLD:ABX2129  
 Ceratopogonidae|GMPJA5690-21|BIOUG66613-H01|BOLD:ABX2129  
 Ceratopogonidae|GMPJA5474-21|BIOUG66611-E11|BOLD:ABX2129  
 Ceratopogonidae|GMPJA5471-21|BIOUG66611-E08|BOLD:ABX2129  
 Ceratopogonidae|GMPJA5319-21|BIOUG66609-H10|BOLD:ABX2129  
 Ceratopogonidae|GMPJA5432-21|BIOUG66611-B05|BOLD:ABX2129  
 Ceratopogonidae|GMPJA5378-21|BIOUG66610-E10|BOLD:ABX2129  
 Ceratopogonidae|GMPJA1552-21|BIOUG65671-G06|BOLD:ABX2129  
 Ceratopogonidae|GMPJA4028-21|BIOUG65697-D02|BOLD:ABX2129  
 Ceratopogonidae|GMPJA8210-21|BIOUG66640-D04|BOLD:ABX2129  
 Ceratopogonidae|GMPJA3115-21|BIOUG65687-G03|BOLD:ABX2129  
 Ceratopogonidae|GMPJA2455-21|BIOUG65681-C07|BOLD:ABX2129  
 Ceratopogonidae|GMPJA5253-21|BIOUG66609-C04|BOLD:ABY5536

Ceratopogonidae|GMPJA3115-21|BIOUG65687-G03|BOLD:ABX2129  
 Ceratopogonidae|GMPJA2455-21|BIOUG65681-C07|BOLD:ABX2129  
 Ceratopogonidae|GMPJA5253-21|BIOUG66609-C04|BOLD:ABY5536  
 Ceratopogonidae|GMPJA7724-21|BIOUG66635-C05|BOLD:ABY5536  
 Ceratopogonidae|GMPJA8683-21|BIOUG66645-D02|BOLD:ABY5536  
 Ceratopogonidae|GMPJA3379-21|BIOUG65690-E06|BOLD:ABY5536  
 Ceratopogonidae|GMPJA10540-21|BIOUG70235-F09|BOLD:ABY5536  
 Ceratopogonidae|GMPJA8353-21|BIOUG66641-H04|BOLD:ABY5536  
 Ceratopogonidae|GMPJA8595-21|BIOUG66644-D09|BOLD:ABY5536  
 Ceratopogonidae|GMPJA3194-21|BIOUG65688-E11|BOLD:ABY5536  
 Ceratopogonidae|GMPJA4306-21|BIOUG65700-C07|BOLD:ABY5536  
 Ceratopogonidae|GMPJA4541-21|BIOUG66602-G04|BOLD:ABY5536  
 Ceratopogonidae|GMPJA3449-21|BIOUG65691-C05|BOLD:ABY5536  
 Ceratopogonidae|GMPJA3215-21|BIOUG65688-G08|BOLD:ABY5536  
 Ceratopogonidae|GMPJA3673-21|BIOUG65693-F03|BOLD:ABY5536  
 Ceratopogonidae|GMPJA3472-21|BIOUG65691-E04|BOLD:ABY5536  
 Ceratopogonidae|GMPJA1779-21|BIOUG65674-B08|BOLD:ABY5536  
 Ceratopogonidae|GMPJA2102-21|BIOUG65677-E10|BOLD:ABY5536  
 Ceratopogonidae|GMPJA2110-21|BIOUG65677-F06|BOLD:ABY5536  
 Ceratopogonidae|GMPJA1323-21|BIOUG65669-D03|BOLD:ABY5536  
 Ceratopogonidae|GMPJA4162-21|BIOUG65698-G05|BOLD:ABY5536  
 Ceratopogonidae|GMPJA1600-21|BIOUG65672-C07|BOLD:ABY5536  
 Ceratopogonidae|GMPJA2095-21|BIOUG65677-E03|BOLD:ABY5536  
 Ceratopogonidae|GMPJA4171-21|BIOUG65698-H02|BOLD:ABY5536  
 Ceratopogonidae|GMPJA4040-21|BIOUG65697-E02|BOLD:ABY5536  
 Ceratopogonidae|GMPJA3925-21|BIOUG65696-C06|BOLD:ABY5536  
 Ceratopogonidae|GMPJA3535-21|BIOUG65692-B08|BOLD:ABY5536  
 Ceratopogonidae|GMPJA4396-21|BIOUG66601-C02|BOLD:ABY5536  
 Ceratopogonidae|GMPJA4317-21|BIOUG65700-D06|BOLD:ABY5536  
 Ceratopogonidae|GMPJA4304-21|BIOUG65700-C05|BOLD:ABY5536  
 Ceratopogonidae|GMPJA4283-21|BIOUG65700-A08|BOLD:ABY5536  
 Ceratopogonidae|GMPJA3377-21|BIOUG65690-E04|BOLD:ABY5536  
 Ceratopogonidae|GMPJA3309-21|BIOUG65689-G07|BOLD:ABY5536  
 Ceratopogonidae|GMPJA3179-21|BIOUG65688-D08|BOLD:ABY5536  
 Ceratopogonidae|GMPJA3091-21|BIOUG65687-E03|BOLD:ABY5536  
 Ceratopogonidae|GMPJA3018-21|BIOUG65686-G01|BOLD:ABY5536  
 Ceratopogonidae|GMPJA4577-21|BIOUG66603-B05|BOLD:ABY5536  
 Ceratopogonidae|GMPJA3423-21|BIOUG65691-A03|BOLD:ABY5536  
 Ceratopogonidae|GMPJA3424-21|BIOUG65691-A04|BOLD:ABY5536  
 Ceratopogonidae|GMPJA10585-21|BIOUG70236-B07|BOLD:ABY5536  
 Ceratopogonidae|GMPJA3305-21|BIOUG65689-G03|BOLD:ABY5536  
 Ceratopogonidae|GMPJA3219-21|BIOUG65688-G12|BOLD:ABY5536  
 Ceratopogonidae|GMPJA3121-21|BIOUG65687-G09|BOLD:ABY5536  
 Ceratopogonidae|GMPJA3180-21|BIOUG65688-D09|BOLD:ABY5536  
 Ceratopogonidae|GMPJA8785-21|BIOUG66646-D09|BOLD:ABY5536  
 Ceratopogonidae|GMPJA8731-21|BIOUG66645-H02|BOLD:ABY5536  
 Ceratopogonidae|GMPJA8676-21|BIOUG66645-C07|BOLD:ABY5536  
 Ceratopogonidae|GMPJA8497-21|BIOUG66643-D06|BOLD:ABY5536  
 Ceratopogonidae|GMPJA8226-21|BIOUG66640-E08|BOLD:ABY5536  
 Ceratopogonidae|GMPJA8180-21|BIOUG66640-A10|BOLD:ABY5536  
 Ceratopogonidae|GMPJA8602-21|BIOUG66644-E04|BOLD:ABY5536  
 Ceratopogonidae|GMPJA7951-21|BIOUG66637-F06|BOLD:ABY5536  
 Ceratopogonidae|GMPJA7871-21|BIOUG66636-G09|BOLD:ABY5536  
 Ceratopogonidae|GMPJA7829-21|BIOUG66636-D03|BOLD:ABY5536  
 Ceratopogonidae|GMPJA7823-21|BIOUG66636-C09|BOLD:ABY5536  
 Ceratopogonidae|GMPJA7766-21|BIOUG66635-F11|BOLD:ABY5536  
 Ceratopogonidae|GMPJA7300-21|BIOUG66630-G08|BOLD:ABY5536  
 Ceratopogonidae|GMPJA7272-21|BIOUG66630-E04|BOLD:ABY5536  
 Ceratopogonidae|GMPJA7454-21|BIOUG66632-D08|BOLD:ABY5536  
 Ceratopogonidae|GMPJA5486-21|BIOUG66611-F11|BOLD:ABY5536  
 Ceratopogonidae|GMPJA5092-21|BIOUG66607-E09|BOLD:ABY5536  
 Ceratopogonidae|GMPJA2425-21|BIOUG65681-A01|BOLD:ABY5536  
 Culicoides clavipalpis|GMPJA2159-21|BIOUG65678-B08|BOLD:AEH2086  
 Ceratopogonidae|GMPJA8074-21|BIOUG66638-H10|BOLD:AEJ7812  
 Culicoides oxystoma|GMPJA1944-21|BIOUG65675-H06|BOLD:AAD1856  
 Culicoides oxystoma|GMPJA5608-21|BIOUG66613-A03|BOLD:AAD1856  
 Culicoides oxystoma|GMPJA5189-21|BIOUG66608-E11|BOLD:AAD1856  
 Culicoides oxystoma|GMPJA4103-21|BIOUG65698-B06|BOLD:AAD1856  
 Culicoides oxystoma|GMPJA5125-21|BIOUG66607-H06|BOLD:AAD1856  
 Culicoides oxystoma|GMPJA7877-21|BIOUG66636-H03|BOLD:AAD1856  
 Culicoides oxystoma|GMPJA5367-21|BIOUG66610-D11|BOLD:AAD1856  
 Ceratopogonidae|GMPJA7962-21|BIOUG66637-G05|BOLD:ABX9968  
 Ceratopogonidae|GMPJA7702-21|BIOUG66635-A07|BOLD:ACR6113  
 Ceratopogonidae|GMPJA6807-21|BIOUG66625-F02|BOLD:AEJ1407  
 Ceratopogonidae|GMPJA10014-21|BIOUG66658-H05|BOLD:ADU7747  
 Ceratopogonidae|GMPJA8082-21|BIOUG66639-A07|BOLD:ACI9293  
 Ceratopogonidae|GMPJA8075-21|BIOUG66638-H11|BOLD:ACI9293  
 Ceratopogonidae|GMPJA8754-21|BIOUG66646-B02|BOLD:ACW1632  
 Ceratopogonidae|GMPJA7645-21|BIOUG66634-D09|BOLD:ACP4280  
 Ceratopogonidae|GMPJA7264-21|BIOUG66630-D08|BOLD:ACP4280  
 Ceratopogonidae|GMPJA7772-21|BIOUG66635-G05|BOLD:ACP4280  
 Ceratopogonidae|GMPJA7246-21|BIOUG66630-C02|BOLD:ACP4280  
 Ceratopogonidae|GMPJA7385-21|BIOUG66631-F10|BOLD:ACP4280  
 Ceratopogonidae|GMPJA7887-21|BIOUG66637-A02|BOLD:ACP4280  
 Ceratopogonidae|GMPJA8317-21|BIOUG66641-E04|BOLD:ACP4280  
 Ceratopogonidae|GMPJA8006-21|BIOUG66638-C02|BOLD:ACP4280  
 Ceratopogonidae|GMPJA7262-21|BIOUG66630-D06|BOLD:ACP4280  
 Ceratopogonidae|GMPJA8235-21|BIOUG66640-F05|BOLD:ACP4280  
 Ceratopogonidae|GMPJA7482-21|BIOUG66632-F12|BOLD:ACP4280  
 Ceratopogonidae|GMPJA7666-21|BIOUG66634-F06|BOLD:ACP4280  
 Ceratopogonidae|GMPJA8446-21|BIOUG66642-H02|BOLD:ACP4280  
 Ceratopogonidae|GMPJA8079-21|BIOUG66639-A04|BOLD:ACP4280  
 Ceratopogonidae|GMPJA8513-21|BIOUG66643-E10|BOLD:ACP4280  
 Ceratopogonidae|GMPJA7920-21|BIOUG66637-C11|BOLD:ACP4280  
 Ceratopogonidae|GMPJA7975-21|BIOUG66637-H06|BOLD:ACP4280  
 Ceratopogonidae|GMPJA8801-21|BIOUG66646-F01|BOLD:ACP4280  
 Ceratopogonidae|GMPJA7550-21|BIOUG66633-D09|BOLD:ACP4280  
 Ceratopogonidae|GMPJA8796-21|BIOUG66646-E08|BOLD:ACP4280  
 Ceratopogonidae|GMPJA8665-21|BIOUG66645-B08|BOLD:ACP4280  
 Ceratopogonidae|GMPJA8228-21|BIOUG66640-E10|BOLD:ACP4280  
 Ceratopogonidae|GMPJA10270-21|BIOUG70232-G12|BOLD:ACP4280  
 Ceratopogonidae|GMPJA8365-21|BIOUG66642-A05|BOLD:ACP4280  
 Ceratopogonidae|GMPJA8370-21|BIOUG66642-A10|BOLD:ACP4280

Ceratopogonidae|GMPJA10270-21|BIOUG70232-G12|BOLD:ACP4280  
 Ceratopogonidae|GMPJA8365-21|BIOUG66642-A05|BOLD:ACP4280  
 Ceratopogonidae|GMPJA8370-21|BIOUG66642-A10|BOLD:ACP4280  
 Ceratopogonidae|GMPJA10295-21|BIOUG70233-B02|BOLD:ACP4280  
 Ceratopogonidae|GMPJA8015-21|BIOUG66638-C11|BOLD:ACP4280  
 Ceratopogonidae|GMPJA7423-21|BIOUG66632-B01|BOLD:ACP4280  
 Ceratopogonidae|GMPJA8221-21|BIOUG66640-E03|BOLD:ACP4280  
 Ceratopogonidae|GMPJA8009-21|BIOUG66638-C05|BOLD:ACP4280  
 Ceratopogonidae|GMPJA8339-21|BIOUG66641-G02|BOLD:ACP4280  
 Ceratopogonidae|GMPJA7777-21|BIOUG66635-G10|BOLD:ACP4280  
 Ceratopogonidae|GMPJA8166-21|BIOUG66639-H07|BOLD:ACP4280  
 Ceratopogonidae|GMPJA8447-21|BIOUG66642-H03|BOLD:ACP4280  
 Ceratopogonidae|GMPJA7745-21|BIOUG66635-E02|BOLD:ACP4280  
 Ceratopogonidae|GMPJA7689-21|BIOUG66634-H05|BOLD:ACP4280  
 Ceratopogonidae|GMPJA8715-21|BIOUG66645-F10|BOLD:ACP4280  
 Ceratopogonidae|GMPJA7346-21|BIOUG66631-C07|BOLD:ACP4280  
 Ceratopogonidae|GMPJA7614-21|BIOUG66634-B02|BOLD:ACP4280  
 Ceratopogonidae|GMPJA7404-21|BIOUG66631-H05|BOLD:ACP4280  
 Ceratopogonidae|GMPJA8603-21|BIOUG66644-E05|BOLD:ACP4280  
 Ceratopogonidae|GMPJA7538-21|BIOUG66633-C09|BOLD:ACP4280  
 Ceratopogonidae|GMPJA8328-21|BIOUG66641-F03|BOLD:ACP4280  
 Ceratopogonidae|GMPJA8515-21|BIOUG66643-E12|BOLD:ACP4280  
 Ceratopogonidae|GMPJA8241-21|BIOUG66640-F11|BOLD:ACP4280  
 Ceratopogonidae|GMPJA8578-21|BIOUG66644-C04|BOLD:ACP4280  
 Ceratopogonidae|GMPJA8102-21|BIOUG66639-C03|BOLD:ACP4280  
 Ceratopogonidae|GMPJA7872-21|BIOUG66636-G10|BOLD:ACP4280  
 Ceratopogonidae|GMPJA8509-21|BIOUG66643-E06|BOLD:ACP4280  
 Ceratopogonidae|GMPJA8567-21|BIOUG66644-B05|BOLD:ACP4280  
 Ceratopogonidae|GMPJA8774-21|BIOUG66646-C10|BOLD:ACP4280  
 Ceratopogonidae|GMPJA7769-21|BIOUG66635-G02|BOLD:ACP4280  
 Ceratopogonidae|GMPJA7635-21|BIOUG66634-C11|BOLD:ACP4280  
 Ceratopogonidae|GMPJA8652-21|BIOUG66645-A07|BOLD:ACP4280  
 Ceratopogonidae|GMPJA7273-21|BIOUG66630-E05|BOLD:ACP4280  
 Ceratopogonidae|GMPJA8481-21|BIOUG66643-C02|BOLD:ACP4280  
 Ceratopogonidae|GMPJA8449-21|BIOUG66642-H05|BOLD:ACP4280  
 Ceratopogonidae|GMPJA8262-21|BIOUG66640-H08|BOLD:ACP4280  
 Ceratopogonidae|GMPJA8187-21|BIOUG66640-B05|BOLD:ACP4280  
 Ceratopogonidae|GMPJA7588-21|BIOUG66633-G11|BOLD:ACP4280  
 Ceratopogonidae|GMPJA7255-21|BIOUG66630-C11|BOLD:ACP4280  
 Ceratopogonidae|GMPJA7503-21|BIOUG66632-H09|BOLD:ACP4280  
 Ceratopogonidae|GMPJA7392-21|BIOUG66631-G05|BOLD:ACP4280  
 Ceratopogonidae|GMPJA8395-21|BIOUG66642-C11|BOLD:ACP4280  
 Ceratopogonidae|GMPJA10283-21|BIOUG70233-A02|BOLD:ACP4280  
 Ceratopogonidae|GMPJA7846-21|BIOUG66636-E08|BOLD:ACP4280  
 Ceratopogonidae|GMPJA8316-21|BIOUG66641-E03|BOLD:ACP4280  
 Ceratopogonidae|GMPJA7751-21|BIOUG66635-E08|BOLD:ACP4280  
 Ceratopogonidae|GMPJA7753-21|BIOUG66635-E10|BOLD:ACP4280  
 Ceratopogonidae|GMPJA8433-21|BIOUG66642-G01|BOLD:ACP4280  
 Ceratopogonidae|GMPJA8104-21|BIOUG66639-C05|BOLD:ACP4280  
 Ceratopogonidae|GMPJA8334-21|BIOUG66641-F09|BOLD:ACP4280  
 Ceratopogonidae|GMPJA7834-21|BIOUG66636-D08|BOLD:ACP4280  
 Ceratopogonidae|GMPJA7774-21|BIOUG66635-G07|BOLD:ACP4280  
 Ceratopogonidae|GMPJA7881-21|BIOUG66636-H07|BOLD:ACP4280  
 Ceratopogonidae|GMPJA8708-21|BIOUG66645-F03|BOLD:ACP4280  
 Ceratopogonidae|GMPJA7524-21|BIOUG66633-B07|BOLD:ACP4280  
 Ceratopogonidae|GMPJA8784-21|BIOUG66646-D08|BOLD:ACP4280  
 Ceratopogonidae|GMPJA8517-21|BIOUG66643-F02|BOLD:ACP4280  
 Ceratopogonidae|GMPJA8283-21|BIOUG66641-B06|BOLD:ACP4280  
 Ceratopogonidae|GMPJA8758-21|BIOUG66646-B06|BOLD:ACP4280  
 Ceratopogonidae|GMPJA8722-21|BIOUG66645-G05|BOLD:ACP4280  
 Ceratopogonidae|GMPJA8601-21|BIOUG66644-E03|BOLD:ACP4280  
 Ceratopogonidae|GMPJA8267-21|BIOUG66641-A02|BOLD:ACP4280  
 Ceratopogonidae|GMPJA7527-21|BIOUG66633-B10|BOLD:ACP4280  
 Ceratopogonidae|GMPJA7880-21|BIOUG66636-H06|BOLD:ACP4280  
 Ceratopogonidae|GMPJA7555-21|BIOUG66633-E02|BOLD:ACP4280  
 Ceratopogonidae|GMPJA8804-21|BIOUG66646-F04|BOLD:ACP4280  
 Ceratopogonidae|GMPJA7697-21|BIOUG66635-A02|BOLD:ACP4280  
 Ceratopogonidae|GMPJA7613-21|BIOUG66634-B01|BOLD:ACP4280  
 Ceratopogonidae|GMPJA8378-21|BIOUG66642-B06|BOLD:ACP4280  
 Ceratopogonidae|GMPJA8668-21|BIOUG66645-B11|BOLD:ACP4280  
 Ceratopogonidae|GMPJA8394-21|BIOUG66642-C10|BOLD:ACP4280  
 Ceratopogonidae|GMPJA7632-21|BIOUG66634-C08|BOLD:ACP4280  
 Ceratopogonidae|GMPJA7983-21|BIOUG66638-A03|BOLD:ACP4280  
 Ceratopogonidae|GMPJA7691-21|BIOUG66634-H07|BOLD:ACP4280  
 Ceratopogonidae|GMPJA7752-21|BIOUG66635-E09|BOLD:ACP4280  
 Ceratopogonidae|GMPJA7453-21|BIOUG66632-D07|BOLD:ACP4280  
 Ceratopogonidae|GMPJA8593-21|BIOUG66644-D07|BOLD:ACP4280  
 Ceratopogonidae|GMPJA7619-21|BIOUG66634-B07|BOLD:ACP4280  
 Ceratopogonidae|GMPJA7424-21|BIOUG66632-B02|BOLD:ACP4280  
 Ceratopogonidae|GMPJA8570-21|BIOUG66644-B08|BOLD:ACP4280  
 Ceratopogonidae|GMPJA7476-21|BIOUG66632-F06|BOLD:ACP4280  
 Ceratopogonidae|GMPJA8389-21|BIOUG66642-C05|BOLD:ACP4280  
 Ceratopogonidae|GMPJA7609-21|BIOUG66634-A09|BOLD:ACP4280  
 Ceratopogonidae|GMPJA7445-21|BIOUG66632-C11|BOLD:ACP4280  
 Ceratopogonidae|GMPJA7963-21|BIOUG66637-G06|BOLD:ACP4280  
 Ceratopogonidae|GMPJA8052-21|BIOUG66638-F12|BOLD:ACP4280  
 Ceratopogonidae|GMPJA8145-21|BIOUG66639-F10|BOLD:ACP4280  
 Ceratopogonidae|GMPJA7345-21|BIOUG66631-C06|BOLD:ACP4280  
 Ceratopogonidae|GMPJA7875-21|BIOUG66636-H01|BOLD:ACP4280  
 Ceratopogonidae|GMPJA8781-21|BIOUG66646-D05|BOLD:ACP4280  
 Ceratopogonidae|GMPJA7949-21|BIOUG66637-F04|BOLD:ACP4280  
 Ceratopogonidae|GMPJA7603-21|BIOUG66634-A03|BOLD:ACP4280  
 Ceratopogonidae|GMPJA7341-21|BIOUG66631-C02|BOLD:ACP4280  
 Ceratopogonidae|GMPJA7942-21|BIOUG66637-E09|BOLD:ACP4280  
 Ceratopogonidae|GMPJA7927-21|BIOUG66637-D06|BOLD:ACP4280  
 Ceratopogonidae|GMPJA7664-21|BIOUG66634-F04|BOLD:ACP4280  
 Ceratopogonidae|GMPJA7900-21|BIOUG66637-B03|BOLD:ACP4280  
 Ceratopogonidae|GMPJA7338-21|BIOUG66631-B11|BOLD:ACP4280  
 Ceratopogonidae|GMPJA8661-21|BIOUG66645-B04|BOLD:ACP4280  
 Ceratopogonidae|GMPJA7633-21|BIOUG66634-C09|BOLD:ACP4280  
 Ceratopogonidae|GMPJA8573-21|BIOUG66644-B11|BOLD:ACP4280  
 Ceratopogonidae|GMPJA8799-21|BIOUG66646-E11|BOLD:ACP4280  
 Ceratopogonidae|GMPJA7807-21|BIOUG66632-H08|BOLD:ACP4280

- Ceratopogonidae|GMPJA8573-21|BIOUG66644-B11|BOLD:ACP4280
- Ceratopogonidae|GMPJA8799-21|BIOUG66646-E11|BOLD:ACP4280
- Ceratopogonidae|GMPJA7597-21|BIOUG66633-H08|BOLD:ACP4280
- Ceratopogonidae|GMPJA7311-21|BIOUG66630-H07|BOLD:ACP4280
- Ceratopogonidae|GMPJA8383-21|BIOUG66642-B11|BOLD:ACP4280
- Ceratopogonidae|GMPJA8078-21|BIOUG66639-A03|BOLD:ACP4280
- Ceratopogonidae|GMPJA7643-21|BIOUG66634-D07|BOLD:ACP4280
- Ceratopogonidae|GMPJA8202-21|BIOUG66640-C08|BOLD:ACP4280
- Ceratopogonidae|GMPJA8276-21|BIOUG66641-A11|BOLD:ACP4280
- Ceratopogonidae|GMPJA7432-21|BIOUG66632-B10|BOLD:ACP4280
- Ceratopogonidae|GMPJA7675-21|BIOUG66634-G03|BOLD:ACP4280
- Ceratopogonidae|GMPJA8494-21|BIOUG66643-D03|BOLD:ACP4280
- Ceratopogonidae|GMPJA8192-21|BIOUG66640-B10|BOLD:ACP4280
- Ceratopogonidae|GMPJA8109-21|BIOUG66639-C10|BOLD:ACP4280
- Ceratopogonidae|GMPJA8032-21|BIOUG66638-E04|BOLD:ACP4280
- Ceratopogonidae|GMPJA8162-21|BIOUG66639-H03|BOLD:ACP4280
- Ceratopogonidae|GMPJA7374-21|BIOUG66631-E11|BOLD:ACP4280
- Ceratopogonidae|GMPJA8469-21|BIOUG66643-B02|BOLD:ACP4280
- Ceratopogonidae|GMPJA7533-21|BIOUG66633-C04|BOLD:ACP4280
- Ceratopogonidae|GMPJA7319-21|BIOUG66631-A04|BOLD:ACP4280
- Ceratopogonidae|GMPJA8710-21|BIOUG66645-F05|BOLD:ACP4280
- Ceratopogonidae|GMPJA8336-21|BIOUG66641-F11|BOLD:ACP4280
- Ceratopogonidae|GMPJA8288-21|BIOUG66641-B11|BOLD:ACP4280
- Ceratopogonidae|GMPJA8285-21|BIOUG66641-B08|BOLD:ACP4280
- Ceratopogonidae|GMPJA7417-21|BIOUG66632-A07|BOLD:ACP4280
- Ceratopogonidae|GMPJA7926-21|BIOUG66637-D05|BOLD:ACP4280
- Ceratopogonidae|GMPJA8459-21|BIOUG66643-A04|BOLD:ACP4280
- Ceratopogonidae|GMPJA7793-21|BIOUG66636-A03|BOLD:ACP4280
- Ceratopogonidae|GMPJA7626-21|BIOUG66634-C02|BOLD:ACP4280
- Ceratopogonidae|GMPJA7367-21|BIOUG66631-E04|BOLD:ACP4280
- Forcipomyia|GMPJA8299-21|BIOUG66641-C10|BOLD:ABX4360
- Forcipomyia|GMPJA512-21|BIOUG65660-G11|BOLD:ABX4360
- Forcipomyia|GMPJA341-21|BIOUG65659-A07|BOLD:ABX4360
- Forcipomyia|GMPJA8484-21|BIOUG66643-C05|BOLD:ABX4360
- Forcipomyia|GMPJA8263-21|BIOUG66640-H09|BOLD:ABX4360
- Forcipomyia|GMPJA7580-21|BIOUG66633-G03|BOLD:ABX4360
- Forcipomyia|GMPJA066-21|BIOUG65656-B05|BOLD:ABX4360
- Forcipomyia|GMPJA207-21|BIOUG65657-F03|BOLD:ABX4360
- Forcipomyia|GMPJA463-21|BIOUG65660-C10|BOLD:ABX4360
- Forcipomyia|GMPJA1564-21|BIOUG65671-H06|BOLD:ABX4360
- Forcipomyia|GMPJA095-21|BIOUG65656-D10|BOLD:ABX4360
- Forcipomyia|GMPJA1559-21|BIOUG65671-H01|BOLD:ABX4360
- Forcipomyia|GMPJA981-21|BIOUG65665-G05|BOLD:ABX4360
- Forcipomyia|GMPJA504-21|BIOUG65660-G03|BOLD:ABX4360
- Forcipomyia|GMPJA448-21|BIOUG65660-B07|BOLD:ABX4360
- Forcipomyia|GMPJA7780-21|BIOUG66635-H01|BOLD:ABX4360
- Forcipomyia|GMPJA8282-21|BIOUG66641-B05|BOLD:ABX4360
- Forcipomyia|GMPJA8518-21|BIOUG66643-F03|BOLD:ABX4360
- Forcipomyia|GMPJA8143-21|BIOUG66639-F08|BOLD:ABX4360
- Forcipomyia|GMPJA7838-21|BIOUG66636-D12|BOLD:ABX4360
- Forcipomyia|GMPJA8351-21|BIOUG66641-H02|BOLD:ABX4360
- Forcipomyia|GMPJA10614-21|BIOUG70236-D12|BOLD:ABX4360
- Forcipomyia|GMPJA8770-21|BIOUG66646-C06|BOLD:ABX4360
- Forcipomyia|GMPJA417-21|BIOUG65659-G11|BOLD:ABX4360
- Forcipomyia|GMPJA397-21|BIOUG65659-F03|BOLD:ABX4360
- Forcipomyia|GMPJA051-21|BIOUG65656-A02|BOLD:ABX4360
- Forcipomyia|GMPJA445-21|BIOUG65660-B04|BOLD:ABX4360
- Forcipomyia|GMPJA966-21|BIOUG65665-F02|BOLD:ABX4360
- Forcipomyia|GMPJA390-21|BIOUG65659-E08|BOLD:ABX4360
- Forcipomyia|GMPJA646-21|BIOUG65662-C03|BOLD:ABX4360
- Forcipomyia|GMPJA652-21|BIOUG65662-C09|BOLD:ABX4360
- Forcipomyia|GMPJA993-21|BIOUG65665-H05|BOLD:ABX4360
- Forcipomyia|GMPJA1056-21|BIOUG65666-E09|BOLD:ABX4360
- Forcipomyia|GMPJA1073-21|BIOUG65666-G02|BOLD:ABX4360
- Forcipomyia|GMPJA1406-21|BIOUG65670-C03|BOLD:ABX4360
- Forcipomyia|GMPJA1606-21|BIOUG65672-D01|BOLD:ABX4360
- Forcipomyia|GMPJA1697-21|BIOUG65673-C09|BOLD:ABX4360
- Forcipomyia|GMPJA2060-21|BIOUG65677-B04|BOLD:ABX4360
- Forcipomyia|GMPJA718-21|BIOUG65663-A04|BOLD:ABX4360
- Forcipomyia|GMPJA2205-21|BIOUG65678-F06|BOLD:ABX4360
- Forcipomyia|GMPJA2173-21|BIOUG65678-C10|BOLD:ABX4360
- Forcipomyia|GMPJA2371-21|BIOUG65680-D06|BOLD:ABX4360
- Forcipomyia|GMPJA212-21|BIOUG65657-F08|BOLD:ABX4360
- Forcipomyia|GMPJA3926-21|BIOUG65696-C07|BOLD:ABX4360
- Forcipomyia|GMPJA8322-21|BIOUG66641-E09|BOLD:ABX4360
- Forcipomyia|GMPJA7670-21|BIOUG66634-F10|BOLD:ABX4360
- Forcipomyia|GMPJA7480-21|BIOUG66632-F10|BOLD:ABX4360
- Forcipomyia|GMPJA7688-21|BIOUG66634-H04|BOLD:ABX4360
- Forcipomyia|GMPJA7406-21|BIOUG66631-H07|BOLD:ABX4360
- Ceratopogonidae\_incertae\_sedis|GMPJA10287-21|BIOUG70233-A06|BOLD:AFI7763
- Ceratopogonidae|GMPJA8388-21|BIOUG66642-C04|BOLD:ACG0244
- Ceratopogonidae|GMPJA7552-21|BIOUG66633-D11|BOLD:ACG0244
- Ceratopogonidae|GMPJA7771-21|BIOUG66635-G04|BOLD:ACG0244
- Ceratopogonidae|GMPJA10333-21|BIOUG70233-E04|BOLD:ACG0244
- Ceratopogonidae|GMPJA7606-21|BIOUG66634-A06|BOLD:ACG0244
- Ceratopogonidae|GMPJA8324-21|BIOUG66641-E11|BOLD:ACG0244
- Ceratopogonidae|GMPJA8695-21|BIOUG66645-E02|BOLD:ACG0244
- Ceratopogonidae|GMPJA10365-21|BIOUG70233-G12|BOLD:ACG0244
- Ceratopogonidae|GMPJA8719-21|BIOUG66645-G02|BOLD:ACG0244
- Ceratopogonidae|GMPJA8673-21|BIOUG66645-C04|BOLD:ACG0244
- Ceratopogonidae|GMPJA8581-21|BIOUG66644-C07|BOLD:ACG0244
- Ceratopogonidae|GMPJA8260-21|BIOUG66640-H06|BOLD:ACG0244
- Ceratopogonidae|GMPJA10358-21|BIOUG70233-G05|BOLD:ACG0244
- Ceratopogonidae|GMPJA7481-21|BIOUG66632-F11|BOLD:ACG0244
- Ceratopogonidae|GMPJA7484-21|BIOUG66632-G02|BOLD:ACG0244
- Ceratopogonidae|GMPJA8729-21|BIOUG66645-G12|BOLD:ACG0244
- Ceratopogonidae|GMPJA077-21|BIOUG65656-C04|BOLD:ACG0244
- Ceratopogonidae|GMPJA452-21|BIOUG65660-B11|BOLD:ACG0244
- Ceratopogonidae|GMPJA8756-21|BIOUG66646-B04|BOLD:ACG0244
- Ceratopogonidae|GMPJA7542-21|BIOUG66633-D01|BOLD:ACG0244
- Ceratopogonidae|GMPJA7993-21|BIOUG66638-B01|BOLD:ACG0244
- Ceratopogonidae|GMPJA7693-21|BIOUG66634-H09|BOLD:ACG0244

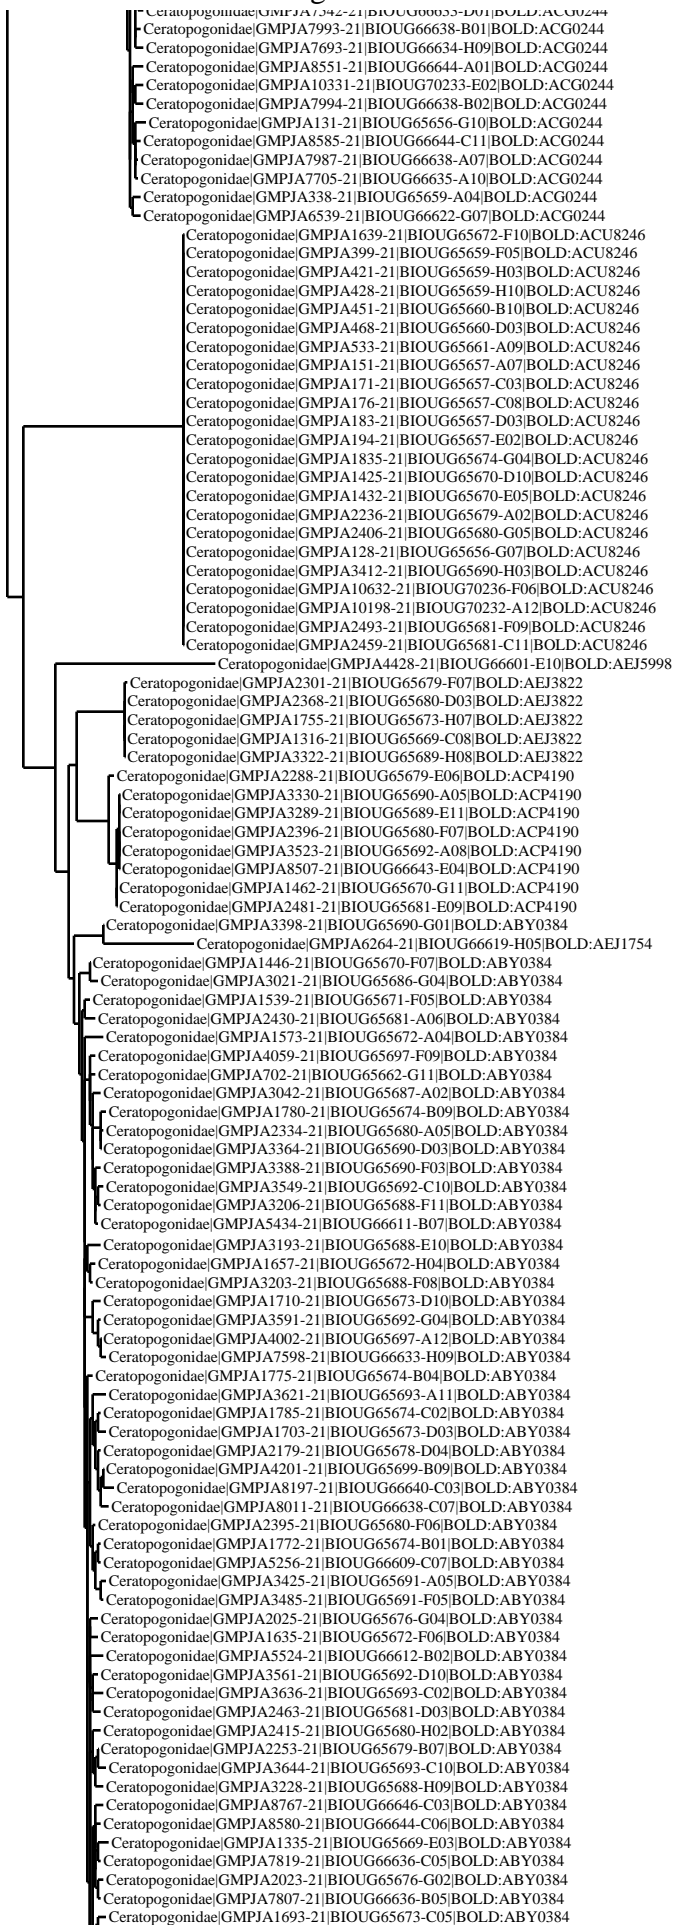



Ceratopogonidae|GMPJA2023-21|BIOUG65670-G02|BOLD:ABY0384  
Ceratopogonidae|GMPJA7807-21|BIOUG66636-B05|BOLD:ABY0384  
Ceratopogonidae|GMPJA1693-21|BIOUG65673-C05|BOLD:ABY0384  
Ceratopogonidae|GMPJA2362-21|BIOUG65680-C09|BOLD:ABY0384  
Ceratopogonidae|GMPJA1626-21|BIOUG65672-E09|BOLD:ABY0384  
Ceratopogonidae|GMPJA2267-21|BIOUG65679-C09|BOLD:ABY0384  
Ceratopogonidae|GMPJA3307-21|BIOUG65689-G05|BOLD:ABY0384  
Ceratopogonidae|GMPJA1815-21|BIOUG65674-E08|BOLD:ABY0384  
Ceratopogonidae|GMPJA1512-21|BIOUG65671-D02|BOLD:ABY0384  
Ceratopogonidae|GMPJA3391-21|BIOUG65690-F06|BOLD:ABY0384  
Ceratopogonidae|GMPJA3387-21|BIOUG65690-F02|BOLD:ABY0384  
Ceratopogonidae|GMPJA2221-21|BIOUG65678-G10|BOLD:ABY0384  
Ceratopogonidae|GMPJA1847-21|BIOUG65674-H04|BOLD:ABY0384  
Ceratopogonidae|GMPJA1740-21|BIOUG65673-G04|BOLD:ABY0384  
Ceratopogonidae|GMPJA3185-21|BIOUG65688-E02|BOLD:ABY0384  
Ceratopogonidae|GMPJA3086-21|BIOUG65687-D10|BOLD:ABY0384  
Ceratopogonidae|GMPJA2319-21|BIOUG65679-H01|BOLD:ABY0384  
Ceratopogonidae|GMPJA1651-21|BIOUG65672-G10|BOLD:ABY0384  
Ceratopogonidae|GMPJA4319-21|BIOUG65700-D08|BOLD:ABY0384  
Ceratopogonidae|GMPJA3176-21|BIOUG65688-D05|BOLD:ABY0384  
Ceratopogonidae|GMPJA3156-21|BIOUG65688-B09|BOLD:ABY0384  
Ceratopogonidae|GMPJA1884-21|BIOUG65675-C06|BOLD:ABY0384  
Ceratopogonidae|GMPJA1138-21|BIOUG65667-D08|BOLD:ABY0384  
Ceratopogonidae|GMPJA2138-21|BIOUG65677-H10|BOLD:ABY0384  
Ceratopogonidae|GMPJA8815-21|BIOUG66646-G03|BOLD:ABY0384  
Ceratopogonidae|GMPJA3593-21|BIOUG65692-G06|BOLD:ABY0384  
Ceratopogonidae|GMPJA8057-21|BIOUG66638-G05|BOLD:ABY0384  
Ceratopogonidae|GMPJA1306-21|BIOUG65669-B10|BOLD:ABY0384  
Ceratopogonidae|GMPJA3257-21|BIOUG65689-C03|BOLD:ABY0384  
Ceratopogonidae|GMPJA1690-21|BIOUG65673-C02|BOLD:ABY0384  
Ceratopogonidae|GMPJA1523-21|BIOUG65671-E01|BOLD:ABY0384  
Ceratopogonidae|GMPJA3541-21|BIOUG65692-C02|BOLD:ABY0384  
Ceratopogonidae|GMPJA1958-21|BIOUG65676-A09|BOLD:ABY0384  
Ceratopogonidae|GMPJA1793-21|BIOUG65674-C10|BOLD:ABY0384  
Ceratopogonidae|GMPJA1501-21|BIOUG65671-C03|BOLD:ABY0384  
Ceratopogonidae|GMPJA3329-21|BIOUG65690-A04|BOLD:ABY0384  
Ceratopogonidae|GMPJA2268-21|BIOUG65679-C10|BOLD:ABY0384  
Ceratopogonidae|GMPJA7369-21|BIOUG66631-E06|BOLD:ABY0384  
Ceratopogonidae|GMPJA3301-21|BIOUG65689-F11|BOLD:ABY0384  
Ceratopogonidae|GMPJA3212-21|BIOUG65688-G05|BOLD:ABY0384  
Ceratopogonidae|GMPJA2059-21|BIOUG65677-B03|BOLD:ABY0384  
Ceratopogonidae|GMPJA1378-21|BIOUG65669-H10|BOLD:ABY0384  
Ceratopogonidae|GMPJA7781-21|BIOUG66635-H02|BOLD:ABY0384  
Ceratopogonidae|GMPJA2379-21|BIOUG65680-E02|BOLD:ABY0384  
Ceratopogonidae|GMPJA2344-21|BIOUG65680-B03|BOLD:ABY0384  
Ceratopogonidae|GMPJA3259-21|BIOUG65689-C05|BOLD:ABY0384  
Ceratopogonidae|GMPJA1542-21|BIOUG65671-F08|BOLD:ABY0384  
Ceratopogonidae|GMPJA2286-21|BIOUG65679-E04|BOLD:ABY0384  
Ceratopogonidae|GMPJA2370-21|BIOUG65680-D05|BOLD:ABY0384  
Ceratopogonidae|GMPJA2323-21|BIOUG65679-H05|BOLD:ABY0384  
Ceratopogonidae|GMPJA2143-21|BIOUG65678-A04|BOLD:ABY0384  
Ceratopogonidae|GMPJA3344-21|BIOUG65690-B07|BOLD:ABY0384  
Ceratopogonidae|GMPJA1506-21|BIOUG65671-C08|BOLD:ABY0384  
Ceratopogonidae|GMPJA3192-21|BIOUG65688-E09|BOLD:ABY0384  
Ceratopogonidae|GMPJA3620-21|BIOUG65693-A10|BOLD:ABY0384  
Ceratopogonidae|GMPJA2465-21|BIOUG65681-D05|BOLD:ABY0384  
Ceratopogonidae|GMPJA1770-21|BIOUG65674-A11|BOLD:ABY0384  
Ceratopogonidae|GMPJA1625-21|BIOUG65672-E08|BOLD:ABY0384  
Ceratopogonidae|GMPJA1924-21|BIOUG65675-F10|BOLD:ABY0384  
Ceratopogonidae|GMPJA1769-21|BIOUG65674-A10|BOLD:ABY0384  
Ceratopogonidae|GMPJA3324-21|BIOUG65689-H10|BOLD:ABY0384  
Ceratopogonidae|GMPJA2303-21|BIOUG65679-F09|BOLD:ABY0384  
Ceratopogonidae|GMPJA2226-21|BIOUG65678-H03|BOLD:ABY0384  
Ceratopogonidae|GMPJA1457-21|BIOUG65670-G06|BOLD:ABY0384  
Ceratopogonidae|GMPJA3544-21|BIOUG65692-C05|BOLD:ABY0384  
Ceratopogonidae|GMPJA2403-21|BIOUG65680-G02|BOLD:ABY0384  
Ceratopogonidae|GMPJA2393-21|BIOUG65680-F04|BOLD:ABY0384  
Ceratopogonidae|GMPJA3144-21|BIOUG65688-A09|BOLD:ABY0384  
Ceratopogonidae|GMPJA2197-21|BIOUG65678-E10|BOLD:ABY0384  
Ceratopogonidae|GMPJA3150-21|BIOUG65688-B03|BOLD:ABY0384  
Ceratopogonidae|GMPJA2291-21|BIOUG65679-E09|BOLD:ABY0384  
Ceratopogonidae|GMPJA2219-21|BIOUG65678-G08|BOLD:ABY0384  
Ceratopogonidae|GMPJA3598-21|BIOUG65692-G11|BOLD:ABY0384  
Ceratopogonidae|GMPJA3210-21|BIOUG65688-G03|BOLD:ABY0384  
Ceratopogonidae|GMPJA3530-21|BIOUG65692-B03|BOLD:ABY0384  
Ceratopogonidae|GMPJA2377-21|BIOUG65680-D12|BOLD:ABY0384  
Ceratopogonidae|GMPJA1313-21|BIOUG65669-C05|BOLD:ABY0384  
Ceratopogonidae|GMPJA3921-21|BIOUG65696-C02|BOLD:ABY0384  
Ceratopogonidae|GMPJA10330-21|BIOUG70233-E01|BOLD:ABY0384  
Ceratopogonidae|GMPJA7312-21|BIOUG66630-H08|BOLD:ABY0384  
Ceratopogonidae|GMPJA1442-21|BIOUG65670-F03|BOLD:ABY0384  
Ceratopogonidae|GMPJA4246-21|BIOUG65699-F06|BOLD:ABY0384  
Ceratopogonidae|GMPJA2422-21|BIOUG65680-H09|BOLD:ABY0384  
Ceratopogonidae|GMPJA7896-21|BIOUG66637-A11|BOLD:ABY0384  
Ceratopogonidae|GMPJA2320-21|BIOUG65679-H02|BOLD:ABY0384  
Ceratopogonidae|GMPJA1423-21|BIOUG65670-D08|BOLD:ABY0384  
Ceratopogonidae|GMPJA2264-21|BIOUG65679-C06|BOLD:ABY0384  
Ceratopogonidae|GMPJA1952-21|BIOUG65676-A03|BOLD:ABY0384  
Ceratopogonidae|GMPJA3507-21|BIOUG65691-H03|BOLD:ABY0384  
Ceratopogonidae|GMPJA4487-21|BIOUG66602-B10|BOLD:ABY0384  
Ceratopogonidae|GMPJA5170-21|BIOUG66608-D04|BOLD:ABY0384  
Ceratopogonidae|GMPJA3292-21|BIOUG65689-F02|BOLD:ABY0384  
Ceratopogonidae|GMPJA3460-21|BIOUG65691-D04|BOLD:ABY0384  
Ceratopogonidae|GMPJA2506-21|BIOUG65681-G10|BOLD:ABY0384  
Ceratopogonidae|GMPJA2278-21|BIOUG65679-D08|BOLD:ABY0384  
Ceratopogonidae|GMPJA2157-21|BIOUG65678-B06|BOLD:ABY0384  
Ceratopogonidae|GMPJA1816-21|BIOUG65674-E09|BOLD:ABY0384  
Ceratopogonidae|GMPJA1372-21|BIOUG65669-H04|BOLD:ABY0384  
Ceratopogonidae|GMPJA3211-21|BIOUG65688-G04|BOLD:ABY0384  
Ceratopogonidae|GMPJA1827-21|BIOUG65674-F08|BOLD:ABY0384  
Ceratopogonidae|GMPJA3348-21|BIOUG65690-B11|BOLD:ABY0384  
Ceratopogonidae|GMPJA1515-21|BIOUG65671-D05|BOLD:ABY0384  
Ceratopogonidae|GMPJA1927-21|BIOUG65675-G01|BOLD:ABY0384

Ceratopogonidae|GMPJA3348-21|BIOUG65690-B11|BOLD:ABY0384  
 Ceratopogonidae|GMPJA1515-21|BIOUG65671-D05|BOLD:ABY0384  
 Ceratopogonidae|GMPJA1927-21|BIOUG65675-G01|BOLD:ABY0384  
 Ceratopogonidae|GMPJA1371-21|BIOUG65669-H03|BOLD:ABY0384  
 Ceratopogonidae|GMPJA3408-21|BIOUG65690-G11|BOLD:ABY0384  
 Ceratopogonidae|GMPJA3145-21|BIOUG65688-A10|BOLD:ABY0384  
 Ceratopogonidae|GMPJA2031-21|BIOUG65676-G10|BOLD:ABY0384  
 Ceratopogonidae|GMPJA2309-21|BIOUG65679-G03|BOLD:ABY0384  
 Ceratopogonidae|GMPJA1624-21|BIOUG65672-E07|BOLD:ABY0384  
 Ceratopogonidae|GMPJA1897-21|BIOUG65675-D07|BOLD:ABY0384  
 Ceratopogonidae|GMPJA2101-21|BIOUG65677-E09|BOLD:ABY0384  
 Ceratopogonidae|GMPJA3464-21|BIOUG65691-D08|BOLD:ABY0384  
 Ceratopogonidae|GMPJA3571-21|BIOUG65692-E08|BOLD:ABY0384  
 Ceratopogonidae|GMPJA3381-21|BIOUG65690-E08|BOLD:ABY0384  
 Ceratopogonidae|GMPJA1707-21|BIOUG65673-D07|BOLD:ABY0384  
 Ceratopogonidae|GMPJA2312-21|BIOUG65679-G06|BOLD:ABY0384  
 Ceratopogonidae|GMPJA3570-21|BIOUG65692-E07|BOLD:ABY0384  
 Ceratopogonidae|GMPJA2109-21|BIOUG65677-F05|BOLD:ABY0384  
 Ceratopogonidae|GMPJA2213-21|BIOUG65678-G02|BOLD:ABY0384  
 Ceratopogonidae|GMPJA2076-21|BIOUG65677-C08|BOLD:ABY0384  
 Ceratopogonidae|GMPJA2475-21|BIOUG65681-E03|BOLD:ABY0384  
 Ceratopogonidae|GMPJA2468-21|BIOUG65681-D08|BOLD:ABY0384  
 Ceratopogonidae|GMPJA2439-21|BIOUG65681-B03|BOLD:ABY0384  
 Ceratopogonidae|GMPJA4118-21|BIOUG65698-C09|BOLD:ABY0384  
 Ceratopogonidae|GMPJA3109-21|BIOUG65687-F09|BOLD:ABY0384  
 Ceratopogonidae|GMPJA3680-21|BIOUG65693-F10|BOLD:ABY0384  
 Ceratopogonidae|GMPJA3232-21|BIOUG65689-A02|BOLD:ABY0384  
 Ceratopogonidae|GMPJA4222-21|BIOUG65699-D06|BOLD:ABY0384  
 Ceratopogonidae|GMPJA2151-21|BIOUG65678-A12|BOLD:ABY0384  
 Ceratopogonidae|GMPJA1721-21|BIOUG65673-E09|BOLD:ABY0384  
 Ceratopogonidae|GMPJA3552-21|BIOUG65692-D01|BOLD:ABY0384  
 Ceratopogonidae|GMPJA3306-21|BIOUG65689-G04|BOLD:ABY0384  
 Ceratopogonidae|GMPJA1424-21|BIOUG65670-D09|BOLD:ABY0384  
 Ceratopogonidae|GMPJA1527-21|BIOUG65671-E05|BOLD:ABY0384  
 Ceratopogonidae|GMPJA1291-21|BIOUG65669-A07|BOLD:ABY0384  
 Ceratopogonidae|GMPJA1967-21|BIOUG65676-B06|BOLD:ABY0384  
 Ceratopogonidae|GMPJA1925-21|BIOUG65675-F11|BOLD:ABY0384  
 Ceratopogonidae|GMPJA3237-21|BIOUG65689-A07|BOLD:ABY0384  
 Ceratopogonidae|GMPJA1543-21|BIOUG65671-F09|BOLD:ABY0384  
 Ceratopogonidae|GMPJA3124-21|BIOUG65687-G12|BOLD:ABY0384  
 Ceratopogonidae|GMPJA3376-21|BIOUG65690-E03|BOLD:ABY0384  
 Ceratopogonidae|GMPJA1495-21|BIOUG65671-B09|BOLD:ABY0384  
 Ceratopogonidae|GMPJA3152-21|BIOUG65688-B05|BOLD:ABY0384  
 Ceratopogonidae|GMPJA3198-21|BIOUG65688-F03|BOLD:ABY0384  
 Ceratopogonidae|GMPJA2269-21|BIOUG65679-C11|BOLD:ABY0384  
 Ceratopogonidae|GMPJA1885-21|BIOUG65675-C07|BOLD:ABY0384  
 Ceratopogonidae|GMPJA1965-21|BIOUG65676-B04|BOLD:ABY0384  
 Ceratopogonidae|GMPJA8068-21|BIOUG66638-H04|BOLD:ABY0384  
 Ceratopogonidae|GMPJA1893-21|BIOUG65675-D03|BOLD:ABY0384  
 Ceratopogonidae|GMPJA1557-21|BIOUG65671-G11|BOLD:ABY0384  
 Ceratopogonidae|GMPJA1386-21|BIOUG65670-A07|BOLD:ABY0384  
 Ceratopogonidae|GMPJA4194-21|BIOUG65699-B02|BOLD:ABY0384  
 Ceratopogonidae|GMPJA1530-21|BIOUG65671-E08|BOLD:ABY0384  
 Ceratopogonidae|GMPJA1781-21|BIOUG65674-B10|BOLD:ABY0384  
 Ceratopogonidae|GMPJA3643-21|BIOUG65693-C09|BOLD:ABY0384  
 Ceratopogonidae|GMPJA3602-21|BIOUG65692-H03|BOLD:ABY0384  
 Ceratopogonidae|GMPJA3594-21|BIOUG65692-G07|BOLD:ABY0384  
 Ceratopogonidae|GMPJA2428-21|BIOUG65681-A04|BOLD:ABY0384  
 Ceratopogonidae|GMPJA10291-21|BIOUG70233-A10|BOLD:ADT6101  
 Ceratopogonidae|GMPJA10237-21|BIOUG70232-E03|BOLD:ADT6101  
 Ceratopogonidae|GMPJA10209-21|BIOUG70232-B11|BOLD:ADT6101  
 Ceratopogonidae|GMPJA2237-21|BIOUG65679-A03|BOLD:ACM9587  
 Ceratopogonidae|GMPJA1505-21|BIOUG65671-C07|BOLD:ACM9587  
 Ceratopogonidae|GMPJA8000-21|BIOUG66638-B08|BOLD:ADT0350  
 Ceratopogonidae|GMPJA5180-21|BIOUG66608-E02|BOLD:ADT0350  
 Ceratopogonidae|GMPJA3037-21|BIOUG65686-H08|BOLD:ACR6752  
 Ceratopogonidae|GMPJA7788-21|BIOUG66635-H09|BOLD:ACR6752  
 Ceratopogonidae|GMPJA8611-21|BIOUG66644-F01|BOLD:ACR6752  
 Ceratopogonidae|GMPJA1645-21|BIOUG65672-G04|BOLD:ACR6752  
 Ceratopogonidae|GMPJA7765-21|BIOUG66635-F10|BOLD:ACR6752  
 Ceratopogonidae|GMPJA5394-21|BIOUG66610-G02|BOLD:ACI9501  
 Ceratopogonidae|GMPJA6874-21|BIOUG66626-C10|BOLD:ACI9501  
 Ceratopogonidae|GMPJA5496-21|BIOUG66611-G09|BOLD:ACI9501  
 Ceratopogonidae|GMPJA7742-21|BIOUG66635-D11|BOLD:ACI9501  
 Ceratopogonidae|GMPJA5264-21|BIOUG66609-D03|BOLD:ACI9501  
 Ceratopogonidae|GMPJA5254-21|BIOUG66609-C05|BOLD:ACI9501  
 Ceratopogonidae|GMPJA3107-21|BIOUG65687-F07|BOLD:ACI9501  
 Ceratopogonidae|GMPJA5375-21|BIOUG66610-E07|BOLD:ACI9501  
 Ceratopogonidae|GMPJA2427-21|BIOUG65681-A03|BOLD:ACI9501  
 Ceratopogonidae|GMPJA4048-21|BIOUG65697-E10|BOLD:ACD8588  
 Ceratopogonidae|GMPJA7568-21|BIOUG66633-F03|BOLD:ACD6049  
 Ceratopogonidae|GMPJA7595-21|BIOUG66633-H06|BOLD:ACD7168  
 Ceratopogonidae|GMPJA6434-21|BIOUG66621-F09|BOLD:ADS4902  
 Ceratopogonidae|GMPJA5307-21|BIOUG66609-G10|BOLD:ADS4902  
 Empididae|GMPJA738-21|BIOUG65663-B12|BOLD:ABW5536  
 Empididae|GMPJA763-21|BIOUG65663-E01|BOLD:ABW5536  
 Empididae|GMPJA645-21|BIOUG65662-C02|BOLD:ABW5536  
 Empididae|GMPJA762-21|BIOUG65663-D12|BOLD:ABW5536  
 Empididae|GMPJA4038-21|BIOUG65697-D12|BOLD:ABW5536  
 Scatopsidae|GMPJA10248-21|BIOUG70232-F02|BOLD:ACU7765  
 Calloptera asteria|GMPJA8454-21|BIOUG66642-H10|BOLD:AEC1863  
 Pachylophus|GMPJA065-21|BIOUG65656-B04|BOLD:AEJ8020  
 Pachylophus|GMPJA226-21|BIOUG65657-G10|BOLD:ACG0823  
 Pachylophus|GMPJA161-21|BIOUG65657-B05|BOLD:ACG0823  
 Pachylophus|GMPJA5473-21|BIOUG66611-E10|BOLD:ACF9854  
 Pachylophus|GMPJA486-21|BIOUG65660-E09|BOLD:ACF9854  
 Pachylophus|GMPJA492-21|BIOUG65660-F03|BOLD:ACF9854  
 Pachylophus|GMPJA4014-21|BIOUG65697-B12|BOLD:ACF9854  
 Pachylophus|GMPJA8040-21|BIOUG66638-E12|BOLD:ACF9854  
 Pachylophus|GMPJA8575-21|BIOUG66644-C01|BOLD:ACF9854  
 Pachylophus|GMPJA1883-21|BIOUG65675-C05|BOLD:ACF9854  
 Pachylophus|GMPJA5174-21|BIOUG66608-D08|BOLD:ACF9854  
 Psectrosciara|GMPJA8552-21|BIOUG66644-A02|BOLD:ABY0151

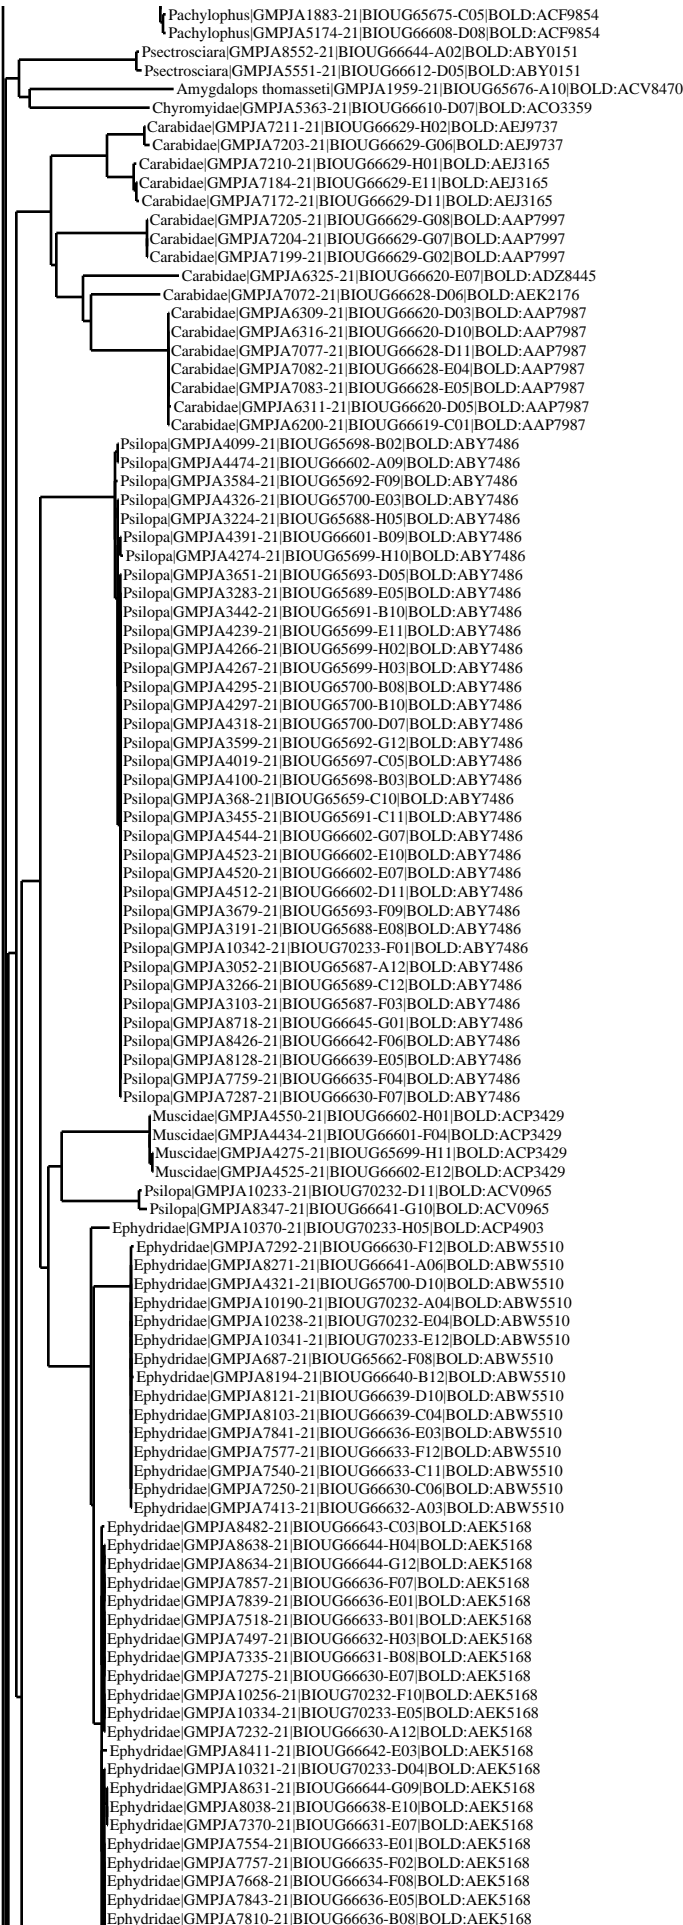

Ephydriidae|GMPJA7668-21|BIOUG66634-F08|BOLD:AEK5168  
 Ephydriidae|GMPJA7843-21|BIOUG66636-E05|BOLD:AEK5168  
 Ephydriidae|GMPJA7810-21|BIOUG66636-B08|BOLD:AEK5168  
 Ephydriidae|GMPJA7903-21|BIOUG66637-B06|BOLD:AEK5168  
 Ephydriidae|GMPJA7865-21|BIOUG66636-G03|BOLD:AEK5168  
 Ephydriidae|GMPJA8136-21|BIOUG66639-F01|BOLD:AEK5168  
 Ephydriidae|GMPJA7922-21|BIOUG66637-D01|BOLD:AEK5168  
 Ephydriidae|GMPJA8170-21|BIOUG66639-H11|BOLD:AEK5168  
 Ephydriidae|GMPJA8265-21|BIOUG66640-H11|BOLD:AEK5168  
 Ephydriidae|GMPJA8374-21|BIOUG66642-B02|BOLD:AEK5168  
 Ephydriidae|GMPJA8624-21|BIOUG66644-G02|BOLD:AEK5168  
 Ephydriidae|GMPJA8659-21|BIOUG66645-B02|BOLD:AEK5168  
 Ephydriidae|GMPJA8717-21|BIOUG66645-F12|BOLD:AEK5168  
 Ephydriidae|GMPJA10255-21|BIOUG70232-F09|BOLD:AEK5168  
 Ephydriidae|GMPJA10374-21|BIOUG70233-H09|BOLD:AEK5168  
 Ephydriidae|GMPJA10204-21|BIOUG70232-B06|BOLD:AEK5168  
 Ephydriidae|GMPJA10274-21|BIOUG70232-H04|BOLD:AEK5168  
 Ephydriidae|GMPJA10252-21|BIOUG70232-F06|BOLD:AEK5168  
 Ephydriidae|GMPJA10210-21|BIOUG70232-B12|BOLD:AEK5168  
 Ephydriidae|GMPJA8545-21|BIOUG66643-H06|BOLD:AEK5168  
 Ephydriidae|GMPJA7636-21|BIOUG66634-C12|BOLD:AEK5168  
 Ephydriidae|GMPJA8081-21|BIOUG66639-A06|BOLD:AEK5168  
 Ephydriidae|GMPJA8076-21|BIOUG66639-A01|BOLD:AEK5168  
 Ephydriidae|GMPJA7536-21|BIOUG66633-C07|BOLD:AEK5168  
 Ephydriidae|GMPJA7534-21|BIOUG66633-C05|BOLD:AEK5168  
 Ephydriidae|GMPJA7274-21|BIOUG66630-E06|BOLD:AEK5168  
 Ephydriidae|GMPJA7719-21|BIOUG66635-B12|BOLD:AEK5168  
 Ephydriidae|GMPJA7447-21|BIOUG66632-D01|BOLD:AEK5168  
 Ephydriidae|GMPJA7446-21|BIOUG66632-C12|BOLD:AEK5168  
 Ephydriidae|GMPJA7355-21|BIOUG66631-D04|BOLD:AEK5168  
 Ephydriidae|GMPJA6417-21|BIOUG66621-E04|BOLD:AEK5168  
 Cylindromyia rufipes|GMPJA10110-21|BIOUG66563-B08|BOLD:AAU6684  
 Tachinidae|GMPJA3255-21|BIOUG65689-C01|BOLD:ACG1036  
 Tachinidae|GMPJA4560-21|BIOUG66602-H11|BOLD:ACW9059  
 Tachinidae|GMPJA10117-21|BIOUG66563-C03|BOLD:ACW9059  
 Tachinidae|GMPJA4904-21|BIOUG63984-E11|BOLD:ACW9059  
 Tachinidae|GMPJA1866-21|BIOUG65675-A12|BOLD:ABX4634  
 Tachinidae|GMPJA5262-21|BIOUG66609-D01|BOLD:ABX4634  
 Tachinidae|GMPJA2004-21|BIOUG65676-E07|BOLD:ABX4634  
 Tachinidae|GMPJA1914-21|BIOUG65675-E12|BOLD:ABX4634  
 Tachinidae|GMPJA2502-21|BIOUG65681-G06|BOLD:ABX4634  
 Polypedilum|GMPJA3559-21|BIOUG65692-D08|BOLD:ACG3836  
 Chironomidae|GMPJA3126-21|BIOUG65687-H02|BOLD:ACW4738  
 Chironomus|GMPJA2232-21|BIOUG65678-H09|BOLD:AAW3997  
 Chironomus|GMPJA147-21|BIOUG65657-A03|BOLD:AAW3997  
 Chironomus|GMPJA3059-21|BIOUG65687-B07|BOLD:AAW3997  
 Chironomidae|GMPJA8264-21|BIOUG66640-H10|BOLD:ACS4768  
 Chironomidae|GMPJA5549-21|BIOUG66612-D03|BOLD:ACS4768  
 Microchironomus tener|GMPJA5577-21|BIOUG66612-F07|BOLD:ADH2380  
 Microchironomus|GMPJA4401-21|BIOUG66601-C07|BOLD:AEJ1930  
 Microchironomus|GMPJA7893-21|BIOUG66637-A08|BOLD:AEJ1930  
 Microchironomus|GMPJA5339-21|BIOUG66610-B07|BOLD:AEJ1930  
 Tanytarsus formosanus|GMPJA10653-21|BIOUG70236-H03|BOLD:ABY1131  
 Tanytarsus formosanus|GMPJA10536-21|BIOUG70235-F05|BOLD:ABY1131  
 Tanytarsus formosanus|GMPJA5259-21|BIOUG66609-C10|BOLD:ABY1131  
 Tanytarsus formosanus|GMPJA10760-21|BIOUG70238-A04|BOLD:ABY1131  
 Tanytarsus formosanus|GMPJA10609-21|BIOUG70236-D07|BOLD:ABY1131  
 Tanytarsus formosanus|GMPJA10602-21|BIOUG70236-C12|BOLD:ABY1131  
 Tanytarsus formosanus|GMPJA10588-21|BIOUG70236-B10|BOLD:ABY1131  
 Tanytarsus formosanus|GMPJA10586-21|BIOUG70236-B08|BOLD:ABY1131  
 Tanytarsus formosanus|GMPJA10561-21|BIOUG70235-H06|BOLD:ABY1131  
 Tanytarsus formosanus|GMPJA3113-21|BIOUG65687-G01|BOLD:ABY1131  
 Tanytarsus formosanus|GMPJA10629-21|BIOUG70236-F03|BOLD:ABY1131  
 Tanytarsus formosanus|GMPJA10665-21|BIOUG70237-A04|BOLD:ABY1131  
 Tanytarsus formosanus|GMPJA10621-21|BIOUG70236-E07|BOLD:ABY1131  
 Tanytarsus formosanus|GMPJA10605-21|BIOUG70236-D03|BOLD:ABY1131  
 Tanytarsus formosanus|GMPJA10590-21|BIOUG70236-B12|BOLD:ABY1131  
 Tanytarsus formosanus|GMPJA10567-21|BIOUG70236-A01|BOLD:ABY1131  
 Tanytarsus formosanus|GMPJA10545-21|BIOUG70235-G02|BOLD:ABY1131  
 Tanytarsus formosanus|GMPJA5459-21|BIOUG66611-D08|BOLD:ABY1131  
 Tanytarsus formosanus|GMPJA5402-21|BIOUG66610-G10|BOLD:ABY1131  
 Tanytarsus formosanus|GMPJA10576-21|BIOUG70236-A10|BOLD:ABY1131  
 Tanytarsus formosanus|GMPJA10534-21|BIOUG70235-F03|BOLD:ABY1131  
 Tanytarsus formosanus|GMPJA10596-21|BIOUG70236-C06|BOLD:ABY1131  
 Tanytarsus formosanus|GMPJA10526-21|BIOUG70235-E07|BOLD:ABY1131  
 Tanytarsus formosanus|GMPJA10555-21|BIOUG70235-G12|BOLD:ABY1131  
 Tanytarsus formosanus|GMPJA10595-21|BIOUG70236-C05|BOLD:ABY1131  
 Tanytarsus formosanus|GMPJA10530-21|BIOUG70235-E11|BOLD:ABY1131  
 Tanytarsus formosanus|GMPJA5400-21|BIOUG66610-G08|BOLD:ABY1131  
 Tanytarsus formosanus|GMPJA5376-21|BIOUG66610-E08|BOLD:ABY1131  
 Tanytarsus formosanus|GMPJA10607-21|BIOUG70236-D05|BOLD:ABY1131  
 Tanytarsus formosanus|GMPJA5566-21|BIOUG66612-E08|BOLD:ABY1131  
 Tanytarsus formosanus|GMPJA5292-21|BIOUG66609-F07|BOLD:ABY1131  
 Tanytarsus formosanus|GMPJA5195-21|BIOUG66608-F05|BOLD:ABY1131  
 Tanytarsus formosanus|GMPJA5609-21|BIOUG66613-A04|BOLD:ABY1131  
 Tanytarsus formosanus|GMPJA10564-21|BIOUG70235-H09|BOLD:ABY1131  
 Tanytarsus formosanus|GMPJA10584-21|BIOUG70236-B06|BOLD:ABY1131  
 Tanytarsus formosanus|GMPJA10626-21|BIOUG70236-E12|BOLD:ABY1131  
 Tanytarsus formosanus|GMPJA10643-21|BIOUG70236-G05|BOLD:ABY1131  
 Tanytarsus formosanus|GMPJA10552-21|BIOUG70235-G09|BOLD:ABY1131  
 Tanytarsus formosanus|GMPJA10563-21|BIOUG70235-H08|BOLD:ABY1131  
 Tanytarsus formosanus|GMPJA10667-21|BIOUG70237-A06|BOLD:ABY1131  
 Tanytarsus formosanus|GMPJA10759-21|BIOUG70238-A03|BOLD:ABY1131  
 Tanytarsus formosanus|GMPJA10631-21|BIOUG70236-F05|BOLD:ABY1131  
 Tanytarsus formosanus|GMPJA10656-21|BIOUG70236-H06|BOLD:ABY1131  
 Tanytarsus formosanus|GMPJA10541-21|BIOUG70235-F10|BOLD:ABY1131  
 Tanytarsus formosanus|GMPJA10647-21|BIOUG70236-G09|BOLD:ABY1131  
 Tanytarsus formosanus|GMPJA10615-21|BIOUG70236-E01|BOLD:ABY1131  
 Tanytarsus formosanus|GMPJA5533-21|BIOUG66612-B11|BOLD:ABY1131  
 Tanytarsus formosanus|GMPJA5331-21|BIOUG66610-A11|BOLD:ABY1131  
 Cladotanytarsus|GMPJA5519-21|BIOUG66612-A09|BOLD:ACA2880  
 Cladotanytarsus|GMPJA5081-21|BIOUG66607-D10|BOLD:ACA2880  
 sMittrial|GMPJA1880-21|BIOUG65675-C02|BOLD:ABW7981

Cladotanytarsus|GMPJA5519-21|BIOUG66612-A09|BOLD:ACA2880  
 Cladotanytarsus|GMPJA5081-21|BIOUG66607-D10|BOLD:ACA2880  
 Smititia|GMPJA1880-21|BIOUG65675-C02|BOLD:ABW7981  
 Smititia|GMPJA1043-21|BIOUG65666-D08|BOLD:ABW7981  
 Smititia|GMPJA697-21|BIOUG65662-G06|BOLD:ABW7981  
 Smititia|GMPJA640-21|BIOUG65662-B09|BOLD:ABW7981  
 Smititia|GMPJA179-21|BIOUG65657-C11|BOLD:ABW7981  
 Smititia|GMPJA114-21|BIOUG65656-F05|BOLD:ABW7981  
 Smititia|GMPJA10601-21|BIOUG70236-C11|BOLD:ABW7981  
 Tanytus|GMPJA3038-21|BIOUG65686-H09|BOLD:ADO6236  
 Chironomidae|GMPJA4307-21|BIOUG65700-C08|BOLD:AEK0720  
 Chironomidae|GMPJA627-21|BIOUG65662-A08|BOLD:ABW5533  
 Chironomidae|GMPJA672-21|BIOUG65662-E05|BOLD:ABW5533  
 Chironomidae|GMPJA667-21|BIOUG65662-D12|BOLD:ABW5533  
 Chironomidae|GMPJA425-21|BIOUG65659-H07|BOLD:ABW5533  
 Chironomidae|GMPJA354-21|BIOUG65659-B08|BOLD:ABW5533  
 Chironomidae|GMPJA382-21|BIOUG65659-D12|BOLD:ABW5533  
 Chironomidae|GMPJA369-21|BIOUG65659-C11|BOLD:ABW5533  
 Chironomidae|GMPJA919-21|BIOUG65665-B03|BOLD:ABW5533  
 Chironomidae|GMPJA433-21|BIOUG65660-A04|BOLD:ABW5533  
 Chironomidae|GMPJA408-21|BIOUG65659-G02|BOLD:ABW5533  
 Chironomidae|GMPJA689-21|BIOUG65662-F10|BOLD:ACV3309  
 Chironomidae|GMPJA3513-21|BIOUG65691-H09|BOLD:ACV3309  
 Chironomidae|GMPJA360-21|BIOUG65659-C02|BOLD:ACV3309  
 Chironomidae|GMPJA505-21|BIOUG65660-G04|BOLD:ACV3309  
 Chironomidae|GMPJA437-21|BIOUG65660-A08|BOLD:ACV3309  
 Chironomidae|GMPJA636-21|BIOUG65662-B05|BOLD:ACV3309  
 Chironomidae|GMPJA622-21|BIOUG65662-A03|BOLD:ACV3309  
 Chironomidae|GMPJA381-21|BIOUG65659-D11|BOLD:ACV3309  
 Chironomidae|GMPJA456-21|BIOUG65660-C03|BOLD:ACV3309  
 Chironomidae|GMPJA730-21|BIOUG65663-B04|BOLD:ACV3309  
 Chironomidae|GMPJA401-21|BIOUG65659-F07|BOLD:ACV3309  
 Chironomidae|GMPJA478-21|BIOUG65660-E01|BOLD:ABW5508  
 Chironomidae|GMPJA749-21|BIOUG65663-C11|BOLD:ABW5508  
 Chironomidae|GMPJA979-21|BIOUG65665-G03|BOLD:ABW5508  
 Chironomidae|GMPJA484-21|BIOUG65660-E07|BOLD:ABW5508  
 Chironomidae|GMPJA737-21|BIOUG65663-B11|BOLD:ABW5508  
 Chironomidae|GMPJA1153-21|BIOUG65667-E11|BOLD:ABW5508  
 Chironomidae|GMPJA760-21|BIOUG65663-D10|BOLD:ABW5508  
 Chironomidae|GMPJA491-21|BIOUG65660-F02|BOLD:ABW5508  
 Chironomidae|GMPJA464-21|BIOUG65660-C11|BOLD:ABW5508  
 Chironomidae|GMPJA918-21|BIOUG65665-B02|BOLD:ABW5508  
 Chironomidae|GMPJA1120-21|BIOUG65667-C02|BOLD:ABW5508  
 Chironomidae|GMPJA1177-21|BIOUG65667-G11|BOLD:ABW5508  
 Chironomidae|GMPJA913-21|BIOUG65665-A09|BOLD:ABW5508  
 Chironomidae|GMPJA447-21|BIOUG65660-B06|BOLD:ABW5508  
 Chironomidae|GMPJA964-21|BIOUG65665-E12|BOLD:ABW5508  
 Chironomidae|GMPJA353-21|BIOUG65659-B07|BOLD:ABW5508  
 Chironomidae|GMPJA647-21|BIOUG65662-C04|BOLD:ABW5508  
 Chironomidae|GMPJA756-21|BIOUG65663-D06|BOLD:ABW5508  
 Chironomidae|GMPJA4645-21|BIOUG66603-H01|BOLD:ABW5508  
 Chironomidae|GMPJA716-21|BIOUG65663-A02|BOLD:ABW5508  
 Chironomidae|GMPJA415-21|BIOUG65659-G09|BOLD:ABW5508  
 Chironomidae|GMPJA423-21|BIOUG65659-H05|BOLD:ABW5508  
 Chironomidae|GMPJA519-21|BIOUG65660-H06|BOLD:ABW5508  
 Chironomidae|GMPJA660-21|BIOUG65662-D05|BOLD:ABW5508  
 Chironomidae|GMPJA535-21|BIOUG65661-A11|BOLD:ABW5508  
 Chironomidae|GMPJA755-21|BIOUG65663-D05|BOLD:ABW5508  
 Chironomidae|GMPJA542-21|BIOUG65661-B06|BOLD:ABW5508  
 Chironomidae|GMPJA420-21|BIOUG65659-H02|BOLD:ABW5508  
 Chironomidae|GMPJA434-21|BIOUG65660-A05|BOLD:ABW5508  
 Chironomidae|GMPJA460-21|BIOUG65660-C07|BOLD:ABW5508  
 Chironomidae|GMPJA485-21|BIOUG65660-E08|BOLD:ABW5508  
 Chironomidae|GMPJA378-21|BIOUG65659-D08|BOLD:ABW5508  
 Chironomidae|GMPJA623-21|BIOUG65662-A04|BOLD:ABW5508  
 Chironomidae|GMPJA680-21|BIOUG65662-F01|BOLD:ABW5508  
 Chironomidae|GMPJA743-21|BIOUG65663-C05|BOLD:ABW5508  
 Chironomidae|GMPJA540-21|BIOUG65661-B04|BOLD:ABW5508  
 Chironomidae|GMPJA678-21|BIOUG65662-E11|BOLD:ABW5508  
 Chironomidae|GMPJA692-21|BIOUG65662-G01|BOLD:ABW5508  
 Chironomidae|GMPJA696-21|BIOUG65662-G05|BOLD:ABW5508  
 Chironomidae|GMPJA708-21|BIOUG65662-H05|BOLD:ABW5508  
 Chironomidae|GMPJA725-21|BIOUG65663-A11|BOLD:ABW5508  
 Chironomidae|GMPJA732-21|BIOUG65663-B06|BOLD:ABW5508  
 Chironomidae|GMPJA758-21|BIOUG65663-D08|BOLD:ABW5508  
 Chironomidae|GMPJA1038-21|BIOUG65666-D03|BOLD:ABW5508  
 Chironomidae|GMPJA1157-21|BIOUG65667-F03|BOLD:ABW5508  
 Chironomidae|GMPJA1171-21|BIOUG65667-G05|BOLD:ABW5508  
 Chironomidae|GMPJA1198-21|BIOUG65668-A09|BOLD:ABW5508  
 Chironomidae|GMPJA516-21|BIOUG65660-H03|BOLD:ABW5508  
 Chironomidae|GMPJA677-21|BIOUG65662-E10|BOLD:ABW5508  
 Chironomidae|GMPJA345-21|BIOUG65659-A11|BOLD:ABW5508  
 Chironomidae|GMPJA717-21|BIOUG65663-A03|BOLD:ABW5508  
 Chironomidae|GMPJA1103-21|BIOUG65667-A09|BOLD:ABW5508  
 Chironomidae|GMPJA501-21|BIOUG65660-F12|BOLD:ABW5508  
 Chironomidae|GMPJA658-21|BIOUG65662-D03|BOLD:ABW5508  
 Chironomidae|GMPJA909-21|BIOUG65665-A05|BOLD:ABW5508  
 Chironomidae|GMPJA764-21|BIOUG65663-E02|BOLD:ABW5508  
 Chironomidae|GMPJA705-21|BIOUG65662-H02|BOLD:ABW5508  
 Chironomidae|GMPJA373-21|BIOUG65659-D03|BOLD:ABW5508  
 Chironomidae|GMPJA759-21|BIOUG65663-D09|BOLD:ABW5508  
 Chironomidae|GMPJA4145-21|BIOUG65698-E12|BOLD:ABW5508  
 Chironomidae|GMPJA673-21|BIOUG65662-E06|BOLD:ABW5508  
 Chironomidae|GMPJA662-21|BIOUG65662-D07|BOLD:ABW5508  
 Chironomidae|GMPJA657-21|BIOUG65662-D02|BOLD:ABW5508  
 Chironomidae|GMPJA638-21|BIOUG65662-B07|BOLD:ABW5508  
 Chironomidae|GMPJA386-21|BIOUG65659-E04|BOLD:ABW5508  
 Chironomidae|GMPJA366-21|BIOUG65659-C08|BOLD:ABW5508  
 Chironomidae|GMPJA355-21|BIOUG65659-B09|BOLD:ABW5508  
 Chironomidae|GMPJA349-21|BIOUG65659-B03|BOLD:ABW5508  
 Chironomidae|GMPJA541-21|BIOUG65661-B05|BOLD:ABW5508  
 Chironomidae|GMPJA534-21|BIOUG65661-A10|BOLD:ABW5508  
 Chironomidae|GMPJA518-21|BIOUG65660-H05|BOLD:ABW5508

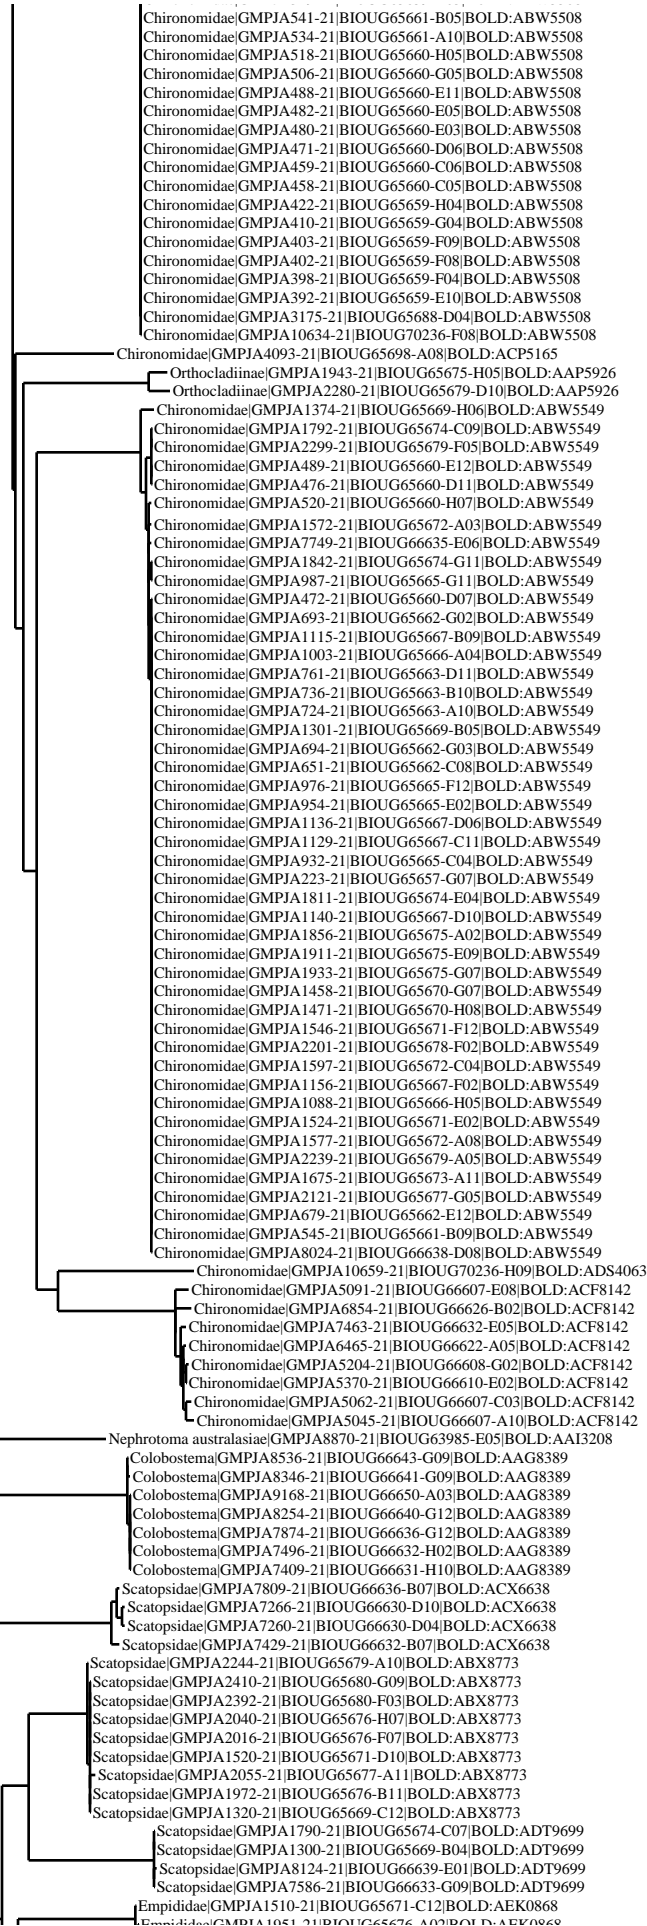

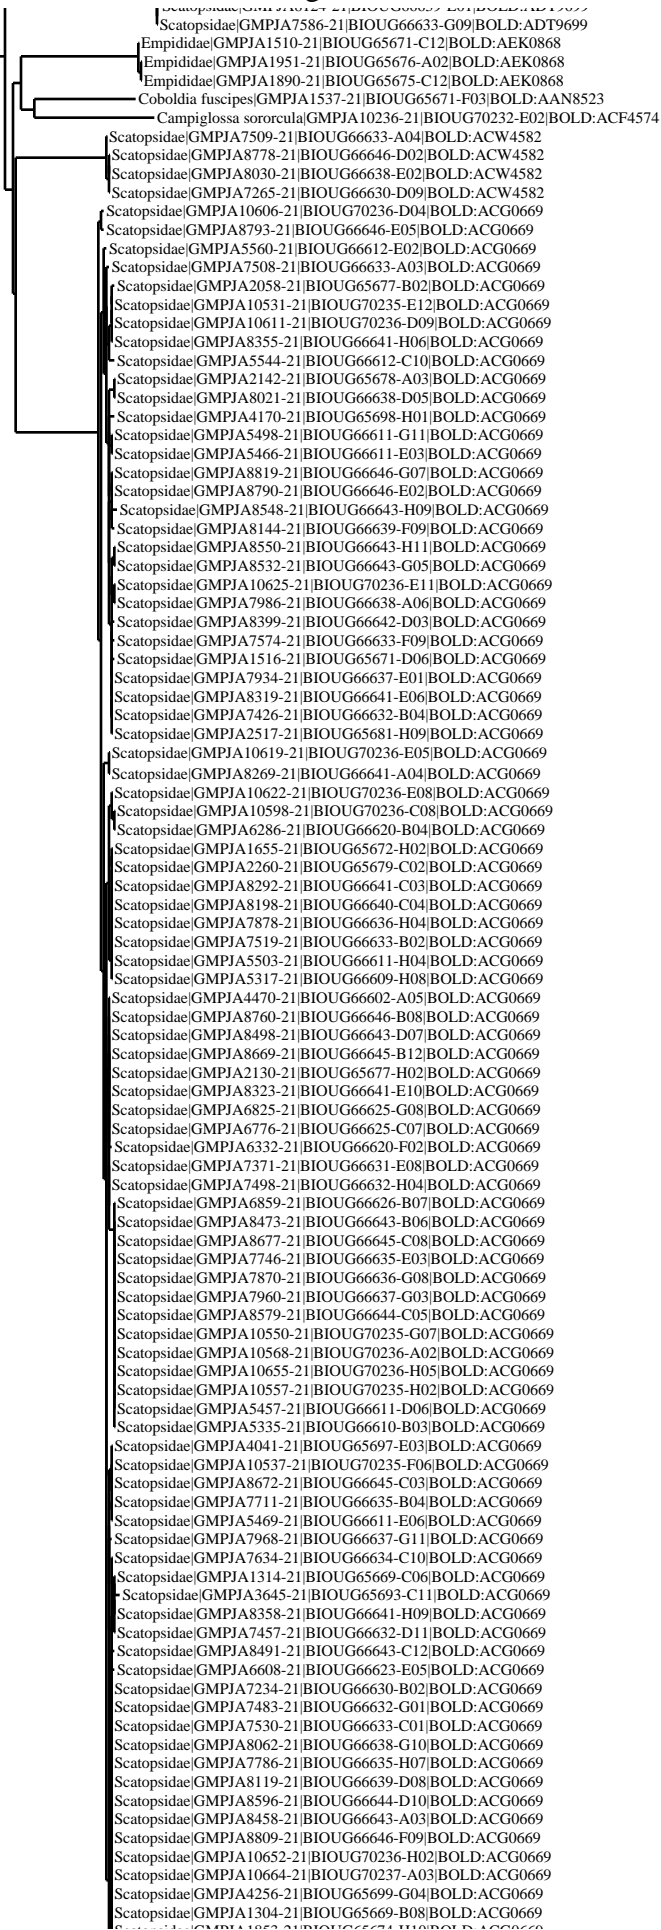

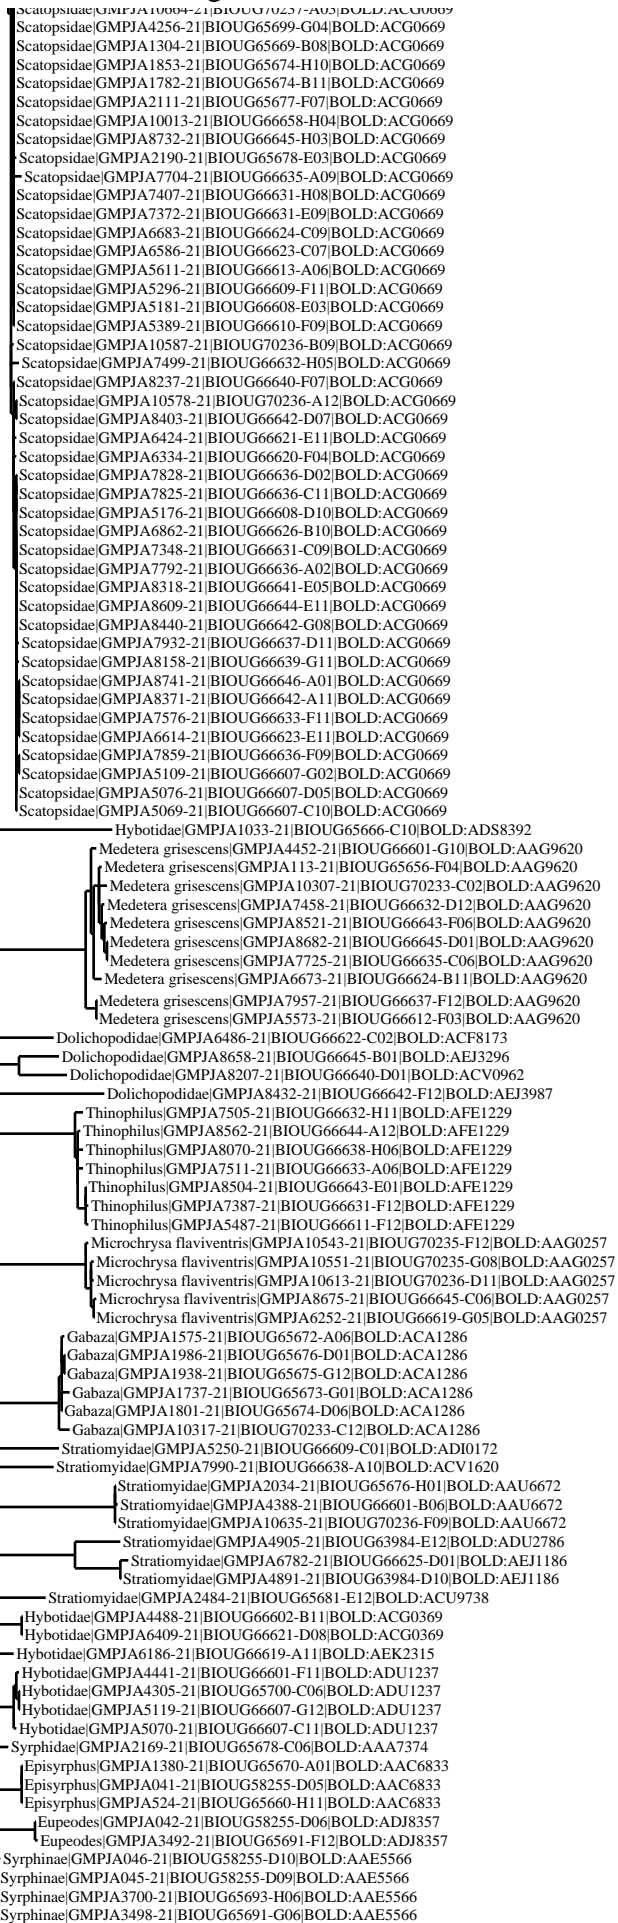



Syrphinae|GMPJA043-21|BIOUG58255-D09|BOLD:AAE5566  
 Syrphinae|GMPJA3700-21|BIOUG65693-H06|BOLD:AAE5566  
 Syrphinae|GMPJA3498-21|BIOUG65691-G06|BOLD:AAE5566  
 Syrphinae|GMPJA043-21|BIOUG58255-D07|BOLD:AAE5566  
 Syrphinae|GMPJA044-21|BIOUG58255-D08|BOLD:AAE5566  
 Syrphinae|GMPJA047-21|BIOUG58255-D11|BOLD:AAE5566  
 Syrphinae|GMPJA048-21|BIOUG58255-D12|BOLD:AAE5566  
 Syrphinae|GMPJA049-21|BIOUG58255-E01|BOLD:AAE5566  
 Syrphinae|GMPJA2233-21|BIOUG65678-H10|BOLD:AAE5566  
 Syrphinae|GMPJA3242-21|BIOUG65689-A12|BOLD:AAE5566  
 Syrphinae|GMPJA2913-21|BIOUG58255-F03|BOLD:AAE5566  
 Syrphinae|GMPJA2912-21|BIOUG58255-F02|BOLD:AAE5566  
 Tachinidae|GMPJA4074-21|BIOUG65697-G12|BOLD:ADT8455  
 Tachinidae|GMPJA10093-21|BIOUG63985-A11|BOLD:ADT8455  
 Tachinidae|GMPJA10240-21|BIOUG70232-E06|BOLD:AAG6798  
 Tachinidae|GMPJA7945-21|BIOUG66637-E12|BOLD:AAG6798  
 Tachinidae|GMPJA10651-21|BIOUG70236-H01|BOLD:AAG6798  
 Tachinidae|GMPJA10218-21|BIOUG70232-C08|BOLD:AAG6798  
 Tachinidae|GMPJA10197-21|BIOUG70232-A11|BOLD:AAG6798  
 Tachinidae|GMPJA200-21|BIOUG65657-E08|BOLD:AAG6798  
 Tachinidae|GMPJA7850-21|BIOUG66636-E12|BOLD:AAG6798  
 Milichia|GMPJA4527-21|BIOUG66602-F02|BOLD:AEK1078  
 Milichia|GMPJA3396-21|BIOUG65690-F11|BOLD:AEK1078  
 Milichia|GMPJA5379-21|BIOUG66610-E11|BOLD:AEK1078  
 Hybotidae|GMPJA2266-21|BIOUG65679-C08|BOLD:AFL4308  
 Hybotidae|GMPJA10251-21|BIOUG70232-F05|BOLD:ACW2596  
 Hybotidae|GMPJA10324-21|BIOUG70233-D07|BOLD:ACW2596  
 Hybotidae|GMPJA8129-21|BIOUG66639-E06|BOLD:ACW2596  
 Hybotidae|GMPJA10201-21|BIOUG70232-B03|BOLD:ACW2596  
 Hybotidae|GMPJA10348-21|BIOUG70233-F07|BOLD:ACW2596  
 Hybotidae|GMPJA10254-21|BIOUG70232-F08|BOLD:ACW2596  
 Hybotidae|GMPJA10284-21|BIOUG70233-A03|BOLD:ACW2596  
 Hybotidae|GMPJA8337-21|BIOUG66641-F12|BOLD:ACW2596  
 Eumerus|GMPJA8875-21|BIOUG63985-E10|BOLD:ADK6263  
 Syrphidae|GMPJA4442-21|BIOUG66601-F12|BOLD:ACV4297  
 Eristalinus|GMPJA4899-21|BIOUG63984-E06|BOLD:AAG4659  
 Eristalinus|GMPJA2909-21|BIOUG58255-E11|BOLD:AAG4659  
 Eristalinus|GMPJA4897-21|BIOUG63984-E04|BOLD:AAG4659  
 Eristalinus|GMPJA4896-21|BIOUG63984-E03|BOLD:AAU6733  
 Eristalinus|GMPJA4901-21|BIOUG63984-E08|BOLD:AAU6733  
 Eristalinus|GMPJA4898-21|BIOUG63984-E05|BOLD:AAU6733  
 Eristalinus|GMPJA4934-21|BIOUG63984-H05|BOLD:AAU6733  
 Eristalinus|GMPJA4900-21|BIOUG63984-E07|BOLD:AAU6733  
 Eristalinus|GMPJA4894-21|BIOUG63984-E01|BOLD:AAU6733  
 Eristalinus|GMPJA4893-21|BIOUG63984-D12|BOLD:AAU6733  
 Eristalinus|GMPJA039-21|BIOUG58255-D03|BOLD:AAF3600  
 Eristalinus|GMPJA2910-21|BIOUG58255-E12|BOLD:AAF3600  
 Eristalinus|GMPJA4885-21|BIOUG63984-D04|BOLD:AAF3600  
 Chrysotus|GMPJA1324-21|BIOUG65669-D04|BOLD:ACO1274  
 Chrysotus pulchellus|GMPJA8687-21|BIOUG66645-D06|BOLD:ABX2177  
 Dolichopodidae|GMPJA8390-21|BIOUG66642-C06|BOLD:ABY0087  
 Dolichopodidae|GMPJA2220-21|BIOUG65678-G09|BOLD:ABY0087  
 Dolichopodidae|GMPJA8414-21|BIOUG66642-E06|BOLD:ABY0087  
 Dolichopodidae|GMPJA10344-21|BIOUG70233-F03|BOLD:ABY0087  
 Dolichopodidae|GMPJA10369-21|BIOUG70233-H04|BOLD:ABY0087  
 Dolichopodidae|GMPJA8064-21|BIOUG66638-G12|BOLD:ABY0087  
 Dolichopodidae|GMPJA7434-21|BIOUG66632-B12|BOLD:ABY0087  
 Dolichopodidae|GMPJA2241-21|BIOUG65679-A07|BOLD:ABY0087  
 Dolichopodidae|GMPJA527-21|BIOUG65661-A03|BOLD:ABY0087  
 Dolichopodidae|GMPJA7642-21|BIOUG66634-D06|BOLD:ABY0087  
 Dolichopodidae|GMPJA6624-21|BIOUG66623-F09|BOLD:ABY0087  
 Dolichopodidae|GMPJA2174-21|BIOUG65678-C11|BOLD:ABY0087  
 Dolichopodidae|GMPJA10263-21|BIOUG70232-G05|BOLD:ABY0087  
 Dolichopodidae|GMPJA2764-21|BIOUG65684-E07|BOLD:ABY0087  
 Dolichopodidae|GMPJA6452-21|BIOUG66621-H03|BOLD:ABY0775  
 Dolichopodidae|GMPJA10311-21|BIOUG70233-C06|BOLD:ABY0775  
 Dolichopodidae|GMPJA7280-21|BIOUG66630-E12|BOLD:ABY0775  
 Dolichopodidae|GMPJA6873-21|BIOUG66626-C09|BOLD:ABY0775  
 Dolichopodidae|GMPJA8527-21|BIOUG66643-F12|BOLD:ABY0775  
 Dolichopodidae|GMPJA5433-21|BIOUG66611-B06|BOLD:ABY0775  
 Dolichopodidae|GMPJA6451-21|BIOUG66621-H02|BOLD:ABY0775  
 Dolichopodidae|GMPJA6386-21|BIOUG66621-B09|BOLD:ABY0775  
 Dolichopodidae|GMPJA6523-21|BIOUG66622-F03|BOLD:ABY0775  
 Dolichopodidae|GMPJA6651-21|BIOUG66624-A01|BOLD:ABY0775  
 Dolichopodidae|GMPJA6786-21|BIOUG66625-D05|BOLD:ABY0775  
 Dolichopodidae|GMPJA8413-21|BIOUG66642-E05|BOLD:ABY0775  
 Dolichopodidae|GMPJA10320-21|BIOUG70233-D03|BOLD:ABY0775  
 Dolichopodidae|GMPJA10220-21|BIOUG70232-C10|BOLD:ABY0775  
 Dolichopodidae|GMPJA10223-21|BIOUG70232-D01|BOLD:ABY0775  
 Dolichopodidae|GMPJA10351-21|BIOUG70233-F10|BOLD:ABY0775  
 Dolichopodidae|GMPJA3272-21|BIOUG65689-D06|BOLD:ABY0775  
 Dolichopodidae|GMPJA3473-21|BIOUG65691-E05|BOLD:ABY0775  
 Dolichopodidae|GMPJA3177-21|BIOUG65688-D06|BOLD:ABY0775  
 Dolichopodidae|GMPJA4130-21|BIOUG65698-D09|BOLD:ABY0775  
 Dolichopodidae|GMPJA4230-21|BIOUG65699-E02|BOLD:ABY0775  
 Dolichopodidae|GMPJA8171-21|BIOUG66640-A01|BOLD:ABY0775  
 Dolichopodidae|GMPJA6845-21|BIOUG66626-A05|BOLD:ABY0775  
 Dolichopodidae|GMPJA6441-21|BIOUG66621-G04|BOLD:ABY0775  
 Dolichopodidae|GMPJA5470-21|BIOUG66611-E07|BOLD:ABY0775  
 Dolichopodidae|GMPJA5454-21|BIOUG66611-D03|BOLD:ABY0775  
 Dolichopodidae|GMPJA5421-21|BIOUG66611-A06|BOLD:ABY0775  
 Dolichopodidae|GMPJA7637-21|BIOUG66634-D01|BOLD:ABY0775  
 Dolichopodidae|GMPJA7375-21|BIOUG66631-E12|BOLD:ABY0775  
 Dolichopodidae|GMPJA5401-21|BIOUG66610-G09|BOLD:ABY0775  
 Dolichopodidae|GMPJA4559-21|BIOUG66602-H10|BOLD:ABX6257  
 Dolichopodidae|GMPJA2057-21|BIOUG65677-B01|BOLD:ABX6257  
 Dolichopodidae|GMPJA4125-21|BIOUG65698-D04|BOLD:ABX6257  
 Dolichopodidae|GMPJA3095-21|BIOUG65687-E07|BOLD:ABX6257  
 Dolichopodidae|GMPJA3260-21|BIOUG65689-C06|BOLD:ABX6257  
 Dolichopodidae|GMPJA5542-21|BIOUG66612-C08|BOLD:ABX6257  
 Dolichopodidae|GMPJA1720-21|BIOUG65673-E08|BOLD:ABX6257  
 Dolichopodidae|GMPJA1529-21|BIOUG65671-E07|BOLD:ABX6257  
 Dolichopodidae|GMPJA1619-21|BIOUG65672-E02|BOLD:ABX6257

Dolichopodidae|GMPJA1720-21|BIOUG65673-E08|BOLD:ABX6257  
 Dolichopodidae|GMPJA1529-21|BIOUG65671-E07|BOLD:ABX6257  
 Dolichopodidae|GMPJA1619-21|BIOUG65672-E02|BOLD:ABX6257  
 Dolichopodidae|GMPJA2346-21|BIOUG65680-B05|BOLD:ABX6257  
 Dolichopodidae|GMPJA4553-21|BIOUG66602-H04|BOLD:ABX6257  
 Dolichopodidae|GMPJA4216-21|BIOUG65699-C12|BOLD:ABX6257  
 Dolichopodidae|GMPJA4451-21|BIOUG66601-G09|BOLD:ABX6257  
 Dolichopodidae|GMPJA5297-21|BIOUG66609-F12|BOLD:ABX6257  
 Dolichopodidae|GMPJA10224-21|BIOUG70232-D02|BOLD:ABX6257  
 Dolichopodidae|GMPJA4364-21|BIOUG65700-H05|BOLD:ABX6257  
 Dolichopodidae|GMPJA5553-21|BIOUG66612-D07|BOLD:ABX6257  
 Dolichopodidae|GMPJA5535-21|BIOUG66612-C01|BOLD:ABX6257  
 Dolichopodidae|GMPJA5224-21|BIOUG66608-H10|BOLD:ABX6257  
 Dolichopodidae|GMPJA5054-21|BIOUG66607-B07|BOLD:ABX6257  
 Dolichopodidae|GMPJA6682-21|BIOUG66624-C08|BOLD:ABX6257  
 Dolichopodidae|GMPJA6851-21|BIOUG66626-A11|BOLD:ABX6257  
 Dolichopodidae|GMPJA10582-21|BIOUG70236-B04|BOLD:ABX6257  
 Dolichopodidae|GMPJA3066-21|BIOUG65687-C02|BOLD:ABX6257  
 Dolichopodidae|GMPJA3267-21|BIOUG65689-D01|BOLD:ABX6257  
 Dolichopodidae|GMPJA4313-21|BIOUG65700-D02|BOLD:ABX6257  
 Dolichopodidae|GMPJA4409-21|BIOUG66601-D03|BOLD:ABX6257  
 Dolichopodidae|GMPJA3526-21|BIOUG65692-A11|BOLD:ABX6257  
 Dolichopodidae|GMPJA3575-21|BIOUG65692-E12|BOLD:ABX6257  
 Dolichopodidae|GMPJA3605-21|BIOUG65692-H06|BOLD:ABX6257  
 Dolichopodidae|GMPJA1474-21|BIOUG65670-H11|BOLD:ABX6257  
 Dolichopodidae|GMPJA1966-21|BIOUG65676-B05|BOLD:ABX6257  
 Dolichopodidae|GMPJA1985-21|BIOUG65676-C12|BOLD:ABX6257  
 Dolichopodidae|GMPJA2011-21|BIOUG65676-F02|BOLD:ABX6257  
 Dolichopodidae|GMPJA2032-21|BIOUG65676-G11|BOLD:ABX6257  
 Dolichopodidae|GMPJA1753-21|BIOUG65673-H05|BOLD:ABX6257  
 Dolichopodidae|GMPJA6534-21|BIOUG66622-G02|BOLD:ABX6257  
 Dolichopodidae|GMPJA5591-21|BIOUG66612-G09|BOLD:ABX6257  
 Dolichopodidae|GMPJA2478-21|BIOUG65681-E06|BOLD:ABX6257  
 Phoridae|GMPJA3369-21|BIOUG65690-D08|BOLD:ACV8100  
 Phoridae|GMPJA6467-21|BIOUG66622-A07|BOLD:ACP4519  
 Phoridae|GMPJA3155-21|BIOUG65688-B08|BOLD:ACP3822  
 Phoridae|GMPJA6706-21|BIOUG66624-E08|BOLD:ACP3822  
 Phoridae|GMPJA3073-21|BIOUG65687-C09|BOLD:AEJ8817  
 Megaselia albicans|GMPJA5456-21|BIOUG66611-D05|BOLD:ACF7689  
 Megaselia albicans|GMPJA5610-21|BIOUG66613-A05|BOLD:ACF7689  
 Megaselia albicans|GMPJA5550-21|BIOUG66612-D04|BOLD:ACF7689  
 Megaselia albicans|GMPJA3265-21|BIOUG65689-C11|BOLD:ACF7689  
 Megaselia albicans|GMPJA7958-21|BIOUG66637-G01|BOLD:ACF7689  
 Megaselia albicans|GMPJA4308-21|BIOUG65700-C09|BOLD:ACF7689  
 Megaselia albicans|GMPJA5232-21|BIOUG66609-A07|BOLD:ACF7689  
 Megaselia albicans|GMPJA4168-21|BIOUG65698-G11|BOLD:ACF7689  
 Megaselia albicans|GMPJA4551-21|BIOUG66602-H02|BOLD:ACF7689  
 Megaselia albicans|GMPJA5306-21|BIOUG66609-G09|BOLD:ACF7689  
 Megaselia albicans|GMPJA5100-21|BIOUG66607-F05|BOLD:ACF7689  
 Megaselia albicans|GMPJA4094-21|BIOUG65698-A09|BOLD:ACF7689  
 Megaselia albicans|GMPJA948-21|BIOUG65665-D08|BOLD:ACF7689  
 Megaselia albicans|GMPJA641-21|BIOUG65662-B10|BOLD:ACF7689  
 Megaselia albicans|GMPJA5593-21|BIOUG66612-G11|BOLD:ACF7689  
 Megaselia albicans|GMPJA5305-21|BIOUG66609-G08|BOLD:ACF7689  
 Megaselia albicans|GMPJA5431-21|BIOUG66611-B04|BOLD:ACF7689  
 Megaselia albicans|GMPJA5324-21|BIOUG66610-A04|BOLD:ACF7689  
 Megaselia albicans|GMPJA4547-21|BIOUG66602-G10|BOLD:ACF7689  
 Megaselia albicans|GMPJA3392-21|BIOUG65690-F07|BOLD:ACF7689  
 Megaselia albicans|GMPJA5397-21|BIOUG66610-G05|BOLD:ACF7689  
 Megaselia albicans|GMPJA7469-21|BIOUG66632-E11|BOLD:ACF7689  
 Megaselia albicans|GMPJA5260-21|BIOUG66609-C11|BOLD:ACF7689  
 Megaselia albicans|GMPJA5437-21|BIOUG66611-B10|BOLD:ACF7689  
 Megaselia albicans|GMPJA5504-21|BIOUG66611-H05|BOLD:ACF7689  
 Megaselia albicans|GMPJA5442-21|BIOUG66611-C03|BOLD:ACF7689  
 Megaselia albicans|GMPJA5585-21|BIOUG66612-G03|BOLD:ACF7689  
 Megaselia albicans|GMPJA4225-21|BIOUG65699-D09|BOLD:ACF7689  
 Megaselia albicans|GMPJA4411-21|BIOUG66601-D05|BOLD:ACF7689  
 Megaselia albicans|GMPJA3170-21|BIOUG65688-C11|BOLD:ACF7689  
 Megaselia albicans|GMPJA5426-21|BIOUG66611-A11|BOLD:ACF7689  
 Megaselia albicans|GMPJA5364-21|BIOUG66610-D08|BOLD:ACF7689  
 Megaselia albicans|GMPJA5355-21|BIOUG66610-C11|BOLD:ACF7689  
 Megaselia albicans|GMPJA5575-21|BIOUG66612-F05|BOLD:ACF7689  
 Megaselia albicans|GMPJA5491-21|BIOUG66611-G04|BOLD:ACF7689  
 Megaselia albicans|GMPJA5446-21|BIOUG66611-C07|BOLD:ACF7689  
 Megaselia albicans|GMPJA4207-21|BIOUG65699-C03|BOLD:ACF7689  
 Megaselia albicans|GMPJA5425-21|BIOUG66611-A10|BOLD:ACF7689  
 Megaselia albicans|GMPJA2354-21|BIOUG65680-C01|BOLD:ACF7689  
 Megaselia albicans|GMPJA10542-21|BIOUG70235-F11|BOLD:ACF7689  
 Megaselia albicans|GMPJA5438-21|BIOUG66611-B11|BOLD:ACF7689  
 Megaselia albicans|GMPJA5468-21|BIOUG66611-E05|BOLD:ACF7689  
 Megaselia albicans|GMPJA3229-21|BIOUG65688-H10|BOLD:ACF7689  
 Megaselia albicans|GMPJA5383-21|BIOUG66610-F03|BOLD:ACF7689  
 Megaselia albicans|GMPJA5384-21|BIOUG66610-F04|BOLD:ACF7689  
 Megaselia albicans|GMPJA5411-21|BIOUG66610-H07|BOLD:ACF7689  
 Megaselia albicans|GMPJA5448-21|BIOUG66611-C09|BOLD:ACF7689  
 Megaselia albicans|GMPJA5097-21|BIOUG66607-F02|BOLD:ACF7689  
 Megaselia albicans|GMPJA5110-21|BIOUG66607-G03|BOLD:ACF7689  
 Megaselia albicans|GMPJA5138-21|BIOUG66608-A08|BOLD:ACF7689  
 Megaselia albicans|GMPJA5139-21|BIOUG66608-A09|BOLD:ACF7689  
 Megaselia albicans|GMPJA5187-21|BIOUG66608-E09|BOLD:ACF7689  
 Megaselia albicans|GMPJA5193-21|BIOUG66608-F03|BOLD:ACF7689  
 Megaselia albicans|GMPJA5217-21|BIOUG66608-H03|BOLD:ACF7689  
 Megaselia albicans|GMPJA5221-21|BIOUG66608-H07|BOLD:ACF7689  
 Megaselia albicans|GMPJA5239-21|BIOUG66609-B02|BOLD:ACF7689  
 Megaselia albicans|GMPJA5281-21|BIOUG66609-E08|BOLD:ACF7689  
 Megaselia albicans|GMPJA5290-21|BIOUG66609-F05|BOLD:ACF7689  
 Megaselia albicans|GMPJA5555-21|BIOUG66612-D09|BOLD:ACF7689  
 Megaselia albicans|GMPJA5597-21|BIOUG66612-H03|BOLD:ACF7689  
 Megaselia albicans|GMPJA4497-21|BIOUG66602-C08|BOLD:ACF7689  
 Megaselia albicans|GMPJA10610-21|BIOUG70236-D08|BOLD:ACF7689  
 Megaselia albicans|GMPJA4202-21|BIOUG65699-B10|BOLD:ACF7689  
 Megaselia albicans|GMPJA4244-21|BIOUG65699-F04|BOLD:ACF7689  
 Megaselia albicans|GMPJA4375-21|BIOUG66601-A05|BOLD:ACF7689

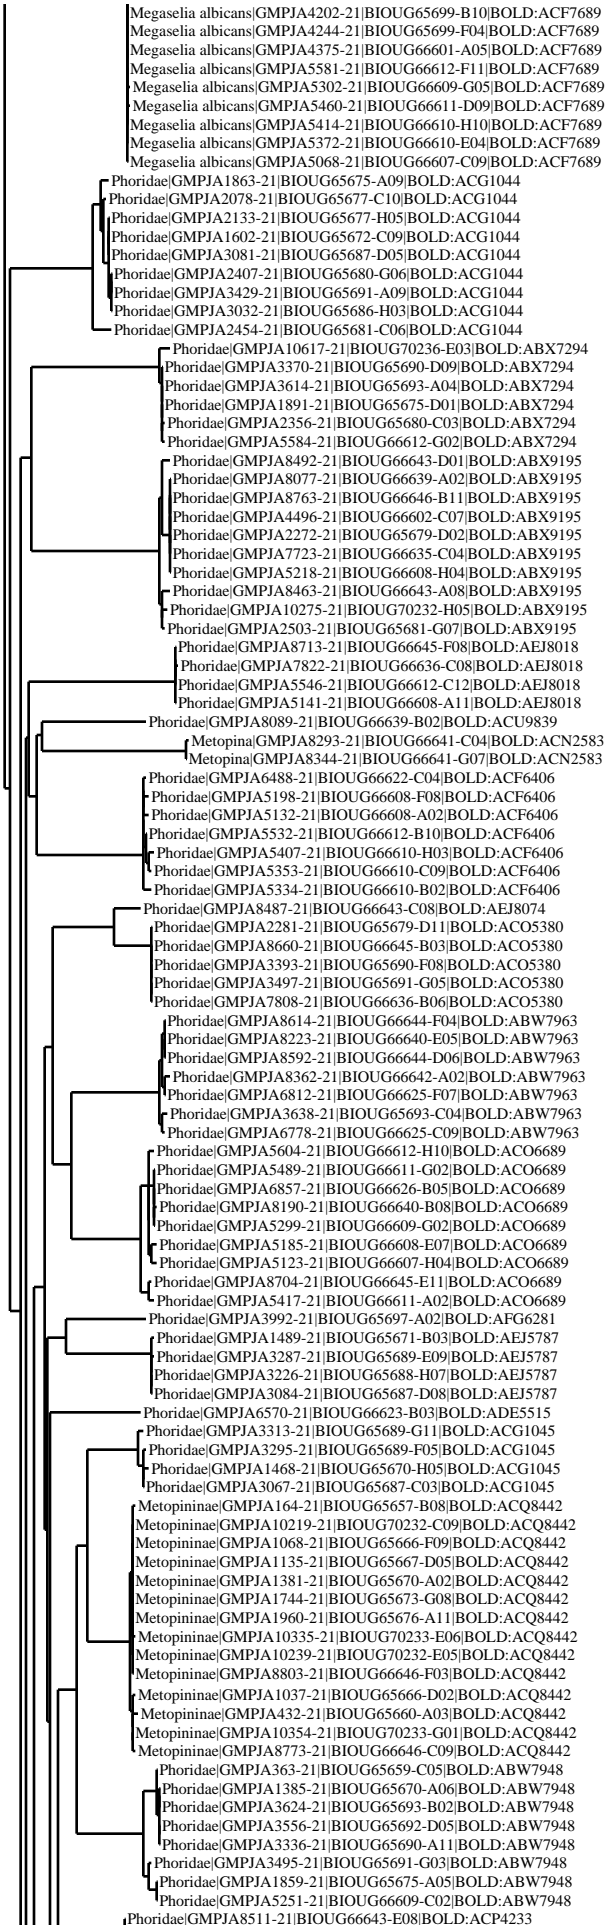

Phoridae|GMPJA1859-21|BIOUG65675-A05|BOLD:ABW7948  
 Phoridae|GMPJA5251-21|BIOUG66609-C02|BOLD:ABW7948  
 Phoridae|GMPJA8511-21|BIOUG66643-E08|BOLD:ACP4233  
 Phoridae|GMPJA10371-21|BIOUG70233-H06|BOLD:ACP4233  
 Phoridae|GMPJA8429-21|BIOUG66642-F09|BOLD:ACP4233  
 Megaselia|GMPJA4564-21|BIOUG66603-A04|BOLD:AEJ9548  
 Megaselia|GMPJA4227-21|BIOUG65699-D11|BOLD:ACA3150  
 Megaselia|GMPJA706-21|BIOUG65662-H03|BOLD:ACA3150  
 Megaselia|GMPJA3162-21|BIOUG65688-C03|BOLD:ACA3150  
 Megaselia|GMPJA8752-21|BIOUG66646-A12|BOLD:ACA3150  
 Megaselia|GMPJA7679-21|BIOUG66634-G07|BOLD:ACA3150  
 Megaselia|GMPJA7744-21|BIOUG66635-E01|BOLD:ACA3150  
 Megaselia|GMPJA2120-21|BIOUG65677-G04|BOLD:ACA3150  
 Megaselia|GMPJA8691-21|BIOUG66645-D10|BOLD:ACA3150  
 Megaselia|GMPJA7789-21|BIOUG66635-H10|BOLD:ACA3150  
 Megaselia|GMPJA8256-21|BIOUG66640-H02|BOLD:ACA3150  
 Megaselia|GMPJA8137-21|BIOUG66639-F02|BOLD:ACA3150  
 Megaselia|GMPJA7395-21|BIOUG66631-G08|BOLD:ACA3150  
 Megaselia|GMPJA10253-21|BIOUG70232-F07|BOLD:ACA3150  
 Megaselia|GMPJA4385-21|BIOUG66601-B03|BOLD:ACA3150  
 Megaselia|GMPJA10618-21|BIOUG70236-E04|BOLD:ACA3150  
 Megaselia|GMPJA8641-21|BIOUG66644-H07|BOLD:ACA3150  
 Megaselia|GMPJA8270-21|BIOUG66641-A05|BOLD:ACA3150  
 Megaselia|GMPJA5485-21|BIOUG66611-F10|BOLD:ACA3150  
 Megaselia|GMPJA8576-21|BIOUG66644-C02|BOLD:ACA3150  
 Megaselia|GMPJA5538-21|BIOUG66612-C04|BOLD:ACA3150  
 Megaselia|GMPJA4166-21|BIOUG65698-G09|BOLD:ACA3150  
 Megaselia|GMPJA7515-21|BIOUG66633-A10|BOLD:ACA3150  
 Megaselia|GMPJA4142-21|BIOUG65698-E09|BOLD:ACA3150  
 Megaselia|GMPJA8582-21|BIOUG66644-C08|BOLD:ACA3150  
 Megaselia|GMPJA3615-21|BIOUG65693-A05|BOLD:ACA3150  
 Megaselia|GMPJA8496-21|BIOUG66643-D05|BOLD:ACA3150  
 Megaselia|GMPJA2167-21|BIOUG65678-C04|BOLD:ACA3150  
 Megaselia|GMPJA8730-21|BIOUG66645-H01|BOLD:ACA3150  
 Megaselia|GMPJA8637-21|BIOUG66644-H03|BOLD:ACA3150  
 Megaselia|GMPJA7556-21|BIOUG66633-E03|BOLD:ACA3150  
 Megaselia|GMPJA5236-21|BIOUG66609-A11|BOLD:ACA3150  
 Megaselia|GMPJA6590-21|BIOUG66623-C11|BOLD:ACA3150  
 Megaselia|GMPJA10638-21|BIOUG70236-F12|BOLD:ACA3150  
 Megaselia|GMPJA6844-21|BIOUG66626-A04|BOLD:ACA3150  
 Megaselia|GMPJA6671-21|BIOUG66624-B09|BOLD:ACA3150  
 Megaselia|GMPJA8689-21|BIOUG66645-D08|BOLD:ACA3150  
 Megaselia|GMPJA8120-21|BIOUG66639-D09|BOLD:ACA3150  
 Megaselia|GMPJA084-21|BIOUG65656-C11|BOLD:ACA3150  
 Megaselia|GMPJA5483-21|BIOUG66611-F08|BOLD:ACA3150  
 Megaselia|GMPJA1467-21|BIOUG65670-H04|BOLD:ACA3150  
 Megaselia|GMPJA4325-21|BIOUG65700-E02|BOLD:ACA3150  
 Megaselia|GMPJA5478-21|BIOUG66611-F03|BOLD:ACA3150  
 Megaselia|GMPJA2122-21|BIOUG65677-G06|BOLD:ACA3150  
 Megaselia|GMPJA057-21|BIOUG65656-A08|BOLD:ACA3150  
 Megaselia|GMPJA4402-21|BIOUG66601-C08|BOLD:ACA3150  
 Megaselia|GMPJA4219-21|BIOUG65699-D03|BOLD:ACA3150  
 Megaselia|GMPJA8712-21|BIOUG66645-F07|BOLD:ACA3150  
 Megaselia|GMPJA8118-21|BIOUG66639-D07|BOLD:ACA3150  
 Megaselia|GMPJA7646-21|BIOUG66634-D10|BOLD:ACA3150  
 Megaselia|GMPJA7997-21|BIOUG66638-B05|BOLD:ACA3150  
 Megaselia|GMPJA7258-21|BIOUG66630-D02|BOLD:ACA3150  
 Megaselia|GMPJA7729-21|BIOUG66635-C10|BOLD:ACA3150  
 Megaselia|GMPJA7449-21|BIOUG66632-D03|BOLD:ACA3150  
 Megaselia|GMPJA6747-21|BIOUG66625-A02|BOLD:ACA3150  
 Megaselia|GMPJA6635-21|BIOUG66623-G08|BOLD:ACA3150  
 Megaselia|GMPJA6583-21|BIOUG66623-C04|BOLD:ACA3150  
 Megaselia|GMPJA5602-21|BIOUG66612-H08|BOLD:ACA3150  
 Megaselia|GMPJA5213-21|BIOUG66608-G11|BOLD:ACA3150  
 Megaselia|GMPJA4005-21|BIOUG65697-B03|BOLD:ACA3150  
 Megaselia|GMPJA5429-21|BIOUG66611-B02|BOLD:ACA3150  
 Megaselia|GMPJA8706-21|BIOUG66645-F01|BOLD:ACA3150  
 Megaselia|GMPJA3998-21|BIOUG65697-A08|BOLD:ACA3150  
 Megaselia|GMPJA5328-21|BIOUG66610-A08|BOLD:ACA3150  
 Phoridae|GMPJA1080-21|BIOUG65666-G09|BOLD:ABW5513  
 Phoridae|GMPJA1076-21|BIOUG65666-G05|BOLD:ABW5513  
 Phoridae|GMPJA2042-21|BIOUG65676-H09|BOLD:ABW5513  
 Phoridae|GMPJA1045-21|BIOUG65666-D10|BOLD:ABW5513  
 Phoridae|GMPJA379-21|BIOUG65659-D09|BOLD:ABW5513  
 Phoridae|GMPJA507-21|BIOUG65660-G06|BOLD:ABW5513  
 Phoridae|GMPJA3120-21|BIOUG65687-G08|BOLD:ABW5562  
 Phoridae|GMPJA5318-21|BIOUG66609-H09|BOLD:ABW5562  
 Phoridae|GMPJA6881-21|BIOUG66626-D05|BOLD:ABW5562  
 Phoridae|GMPJA5229-21|BIOUG66609-A04|BOLD:ABW5562  
 Phoridae|GMPJA5596-21|BIOUG66612-H02|BOLD:ABW5562  
 Phoridae|GMPJA5263-21|BIOUG66609-D02|BOLD:ABW5562  
 Phoridae|GMPJA2337-21|BIOUG65680-A08|BOLD:ABW5562  
 Phoridae|GMPJA4092-21|BIOUG65698-A07|BOLD:ABW5562  
 Phoridae|GMPJA4076-21|BIOUG65697-H02|BOLD:ABW5562  
 Phoridae|GMPJA4261-21|BIOUG65699-G09|BOLD:ABW5562  
 Phoridae|GMPJA3677-21|BIOUG65693-F07|BOLD:ABW5562  
 Phoridae|GMPJA7678-21|BIOUG66634-G06|BOLD:ABW5562  
 Phoridae|GMPJA6612-21|BIOUG66623-E09|BOLD:ABW5562  
 Phoridae|GMPJA5497-21|BIOUG66611-G10|BOLD:ABW5562  
 Phoridae|GMPJA5272-21|BIOUG66609-D11|BOLD:ABW5562  
 Phoridae|GMPJA5157-21|BIOUG66608-C03|BOLD:ABW5562  
 Phoridae|GMPJA5388-21|BIOUG66610-F08|BOLD:ABW5562  
 Phoridae|GMPJA7450-21|BIOUG66632-D04|BOLD:ACS3082  
 Phoridae|GMPJA6659-21|BIOUG66624-A09|BOLD:ACS3082  
 Phoridae|GMPJA6016-21|BIOUG66617-C07|BOLD:ACS3082  
 Phoridae|GMPJA5165-21|BIOUG66608-C11|BOLD:ACS3082  
 Phoridae|GMPJA8045-21|BIOUG66638-F05|BOLD:ACS3082  
 Phoridae|GMPJA5182-21|BIOUG66608-E04|BOLD:ACS3082  
 Phoridae|GMPJA8208-21|BIOUG66640-D02|BOLD:ACS3082  
 Phoridae|GMPJA10271-21|BIOUG70232-H01|BOLD:ACS3082  
 Phoridae|GMPJA8213-21|BIOUG66640-D07|BOLD:ACS3082  
 Phoridae|GMPJA8047-21|BIOUG66638-F07|BOLD:ACS3082  
 Phoridae|GMPJA1614-21|BIOUG65675-D09|BOLD:ACS3082

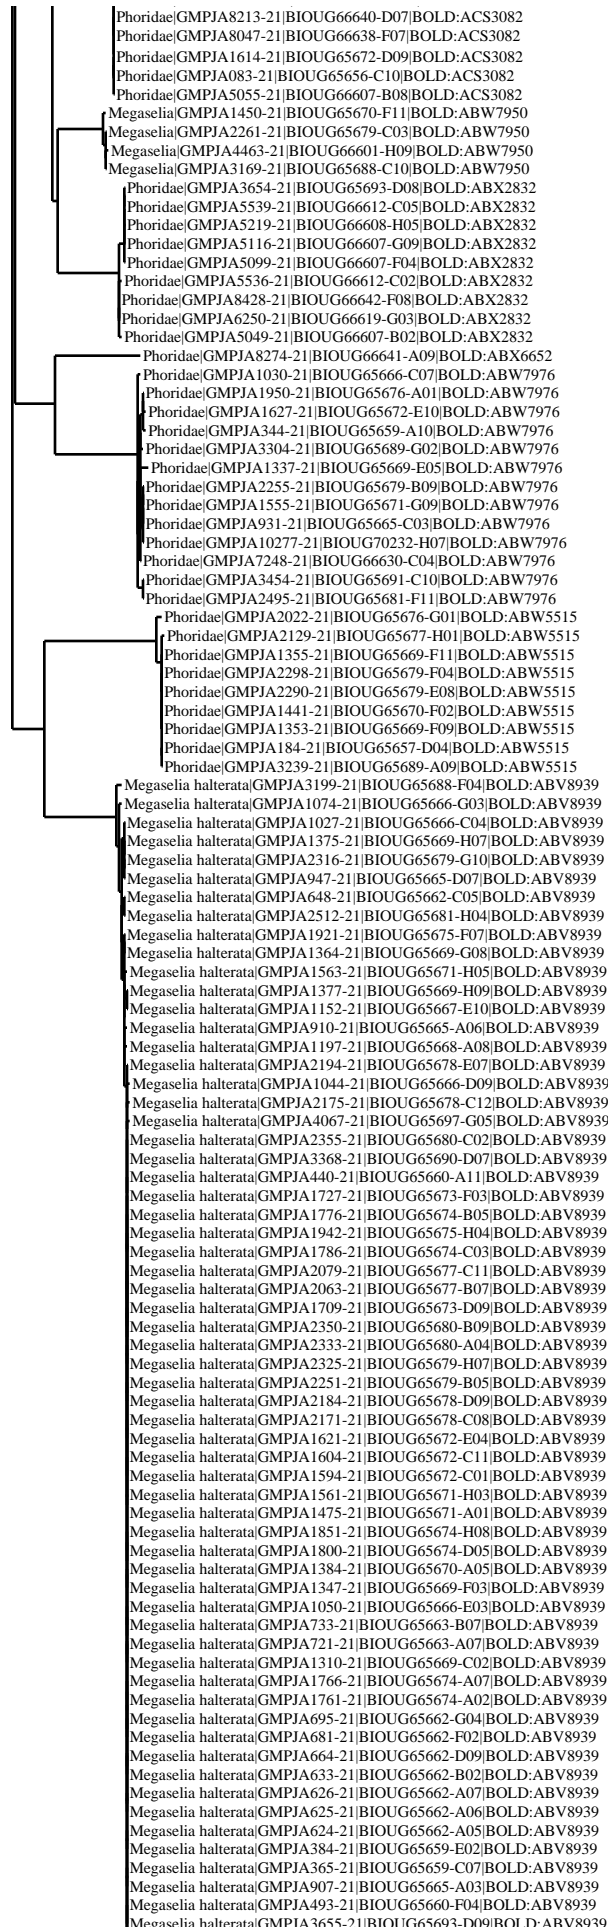

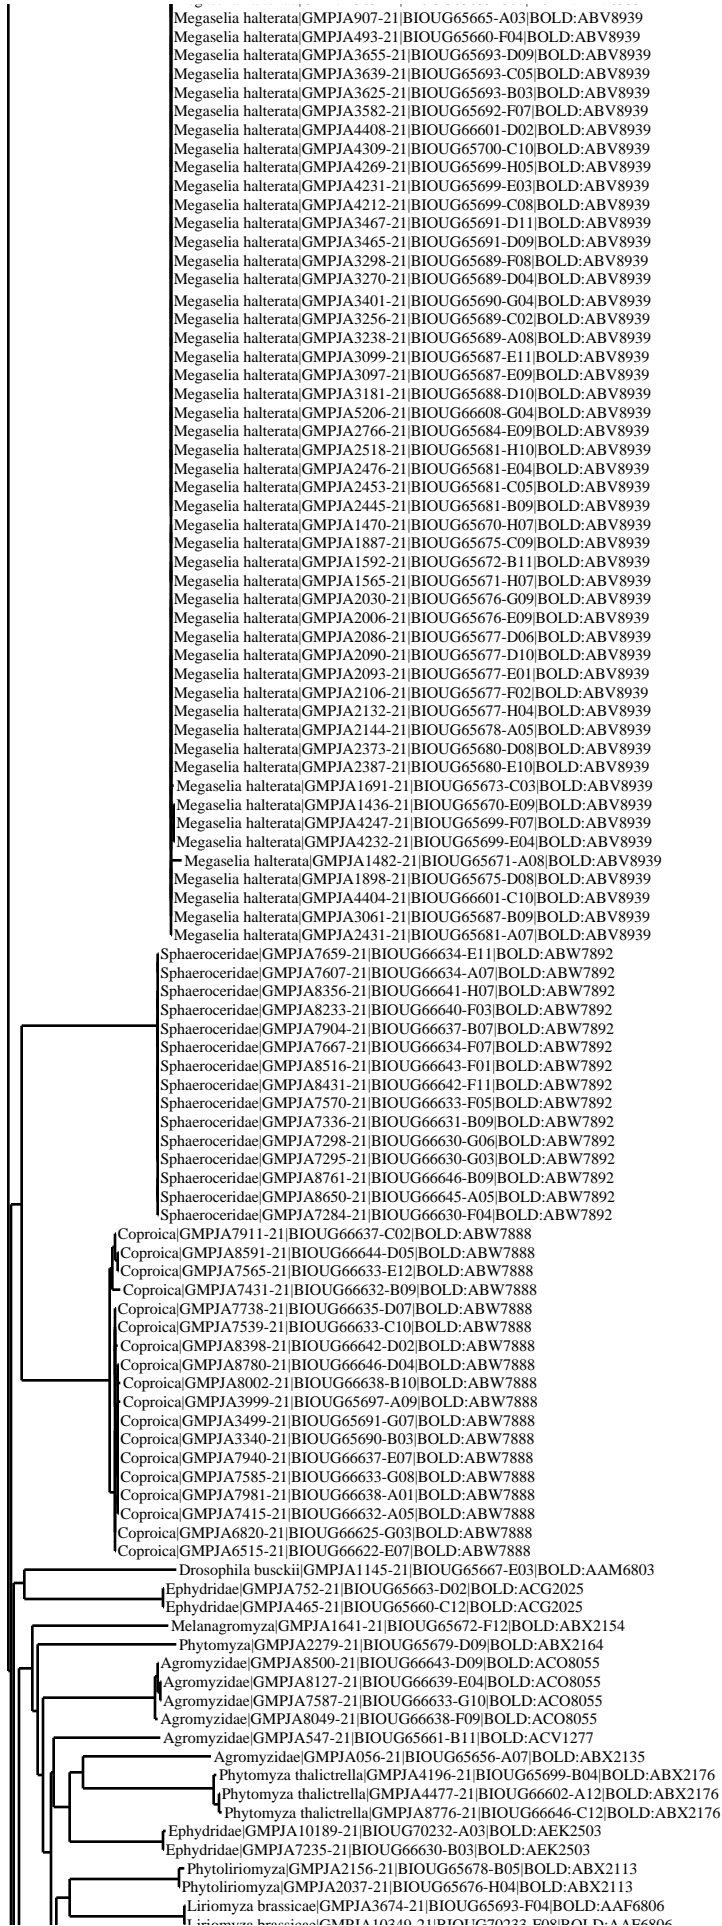



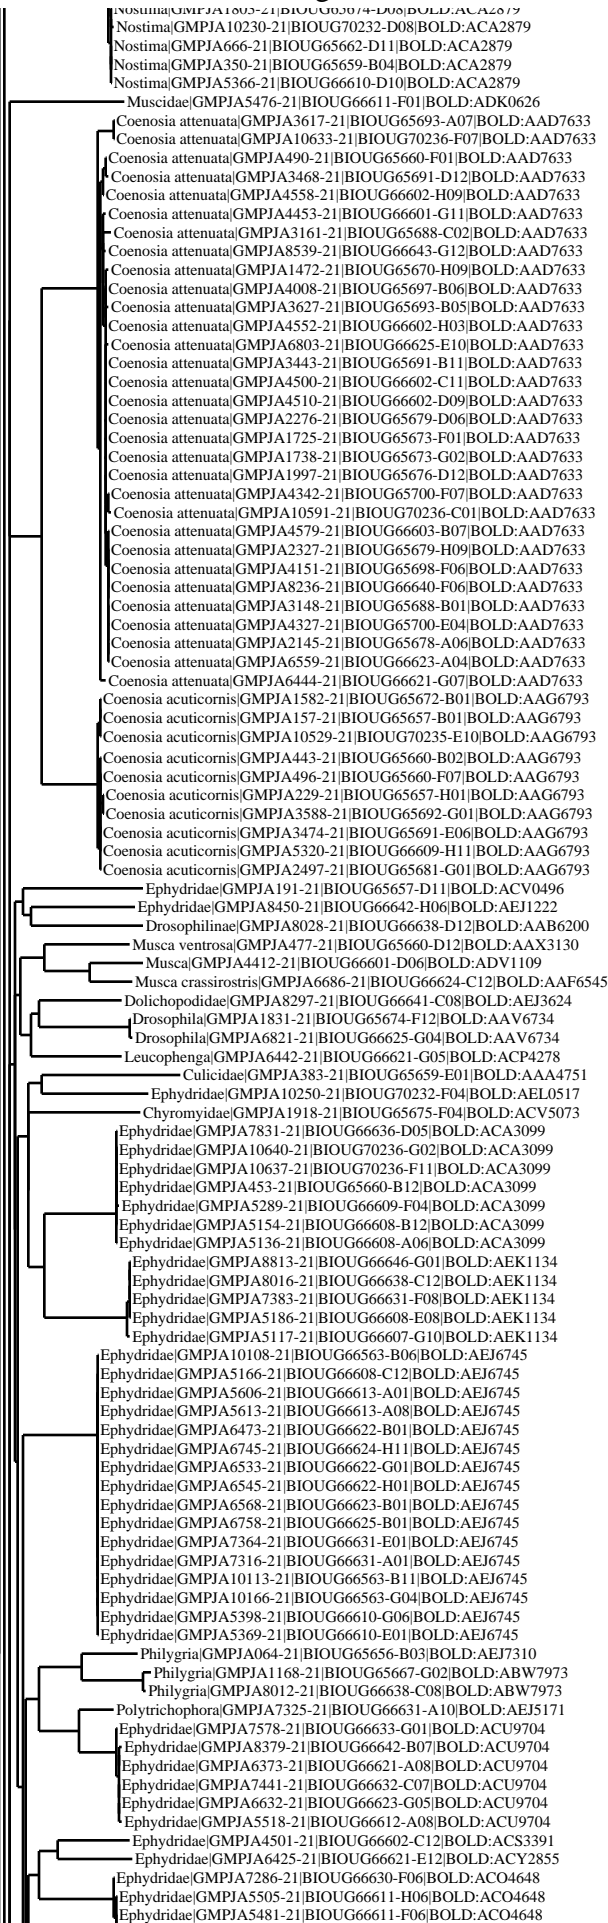



Ephydriidae|GMPJA1286-21|BIOUG66630-F06|BOLD:ACO4648  
 Ephydriidae|GMPJA5505-21|BIOUG66611-H06|BOLD:ACO4648  
 Ephydriidae|GMPJA5481-21|BIOUG66611-F06|BOLD:ACO4648  
 Ephydriidae|GMPJA7767-21|BIOUG66635-F12|BOLD:ACO4648  
 Ephydriidae|GMPJA430-21|BIOUG66606-A01|BOLD:ACO4648  
 Ephydriidae|GMPJA7315-21|BIOUG66630-H11|BOLD:ACO4648  
 Ephydriidae|GMPJA5222-21|BIOUG66608-H08|BOLD:ACO4648  
 Ephydriidae|GMPJA5540-21|BIOUG66612-C06|BOLD:ACO4648  
 Ephydriidae|GMPJA6664-21|BIOUG66624-B02|BOLD:ACO4648  
 Ephydriidae|GMPJA6828-21|BIOUG66625-G11|BOLD:ACO4648  
 Ephydriidae|GMPJA7363-21|BIOUG66631-D12|BOLD:ACO4648  
 Ephydriidae|GMPJA6882-21|BIOUG66626-D06|BOLD:ACO4648  
 Ephydriidae|GMPJA10646-21|BIOUG70236-G08|BOLD:ACO4648  
 Ephydriidae|GMPJA5114-21|BIOUG66607-G07|BOLD:ACO4648  
 Ephydriidae|GMPJA5255-21|BIOUG66609-C06|BOLD:ACO4648  
 Ephydriidae|GMPJA7601-21|BIOUG66634-A01|BOLD:ACO4648  
 Ephydriidae|GMPJA5452-21|BIOUG66611-D01|BOLD:ACO4648  
 Ephydriidae|GMPJA5415-21|BIOUG66610-H11|BOLD:ACO4648  
 Ephydriidae|GMPJA5440-21|BIOUG66611-C01|BOLD:ACO4648  
 Ephydriidae|GMPJA5205-21|BIOUG66608-G03|BOLD:ACO4648  
 Ephydriidae|GMPJA5220-21|BIOUG66608-H06|BOLD:ACO4648  
 Ephydriidae|GMPJA5233-21|BIOUG66609-A08|BOLD:ACO4648  
 Ephydriidae|GMPJA5249-21|BIOUG66609-B12|BOLD:ACO4648  
 Ephydriidae|GMPJA5291-21|BIOUG66609-F06|BOLD:ACO4648  
 Ephydriidae|GMPJA5516-21|BIOUG66612-A06|BOLD:ACO4648  
 Ephydriidae|GMPJA5552-21|BIOUG66612-D06|BOLD:ACO4648  
 Ephydriidae|GMPJA6728-21|BIOUG66624-G06|BOLD:ACO4648  
 Ephydriidae|GMPJA6557-21|BIOUG66623-A02|BOLD:ACO4648  
 Ephydriidae|GMPJA6633-21|BIOUG66623-G06|BOLD:ACO4648  
 Ephydriidae|GMPJA6697-21|BIOUG66624-D11|BOLD:ACO4648  
 Ephydriidae|GMPJA6838-21|BIOUG66625-H09|BOLD:ACO4648  
 Ephydriidae|GMPJA6888-21|BIOUG66626-D12|BOLD:ACO4648  
 Ephydriidae|GMPJA7755-21|BIOUG66635-E12|BOLD:ACO4648  
 Ephydriidae|GMPJA8111-21|BIOUG66639-C12|BOLD:ACO4648  
 Ephydriidae|GMPJA8242-21|BIOUG66640-F12|BOLD:ACO4648  
 Ephydriidae|GMPJA8372-21|BIOUG66642-A12|BOLD:ACO4648  
 Ephydriidae|GMPJA10367-21|BIOUG70233-H02|BOLD:ACO4648  
 Ephydriidae|GMPJA10216-21|BIOUG70232-C06|BOLD:ACO4648  
 Ephydriidae|GMPJA4563-21|BIOUG66603-A03|BOLD:ACO4648  
 Ephydriidae|GMPJA10294-21|BIOUG70233-B01|BOLD:ACO4648  
 Ephydriidae|GMPJA4378-21|BIOUG66601-A08|BOLD:ACO4648  
 Ephydriidae|GMPJA400-21|BIOUG65659-F06|BOLD:ACO4648  
 Ephydriidae|GMPJA498-21|BIOUG65660-F09|BOLD:ACO4648  
 Ephydriidae|GMPJA511-21|BIOUG65660-G10|BOLD:ACO4648  
 Ephydriidae|GMPJA335-21|BIOUG65659-A01|BOLD:ACO4648  
 Ephydriidae|GMPJA347-21|BIOUG65659-B01|BOLD:ACO4648  
 Ephydriidae|GMPJA10241-21|BIOUG70232-E07|BOLD:ACO4648  
 Ephydriidae|GMPJA930-21|BIOUG65665-C02|BOLD:ACO4648  
 Ephydriidae|GMPJA5356-21|BIOUG66610-C12|BOLD:ACO4648  
 Ephydriidae|GMPJA1644-21|BIOUG65672-G03|BOLD:AEJ2830  
 Ephydriidae|GMPJA4518-21|BIOUG66602-E05|BOLD:AEJ3334  
 Ephydriidae|GMPJA4030-21|BIOUG65697-D04|BOLD:AEJ3334  
 Ephydriidae|GMPJA10562-21|BIOUG70235-H07|BOLD:AEJ3334  
 Ephydriidae|GMPJA8794-21|BIOUG66646-E06|BOLD:AEJ3334  
 Ephydriidae|GMPJA8587-21|BIOUG66644-D01|BOLD:AEJ3334  
 Ephydriidae|GMPJA4199-21|BIOUG65699-B07|BOLD:AEJ3334  
 Ephydriidae|GMPJA7817-21|BIOUG66636-C03|BOLD:AEJ3334  
 Ephydriidae|GMPJA5548-21|BIOUG66612-D02|BOLD:ABY1193  
 Ephydriidae|GMPJA2307-21|BIOUG65679-G01|BOLD:ABY1193  
 Ephydriidae|GMPJA10662-21|BIOUG70237-A01|BOLD:ABY1193  
 Ephydriidae|GMPJA8117-21|BIOUG66639-D06|BOLD:ABY1193  
 Ephydriidae|GMPJA7261-21|BIOUG66630-D05|BOLD:ABY1193  
 Ephydriidae|GMPJA6528-21|BIOUG66622-F08|BOLD:ABY1193  
 Ephydriidae|GMPJA5589-21|BIOUG66612-G07|BOLD:ABY1193  
 Ephydriidae|GMPJA4140-21|BIOUG65698-E07|BOLD:ABY1193  
 Ephydriidae|GMPJA8472-21|BIOUG66643-B05|BOLD:ABY1193  
 Ephydriidae|GMPJA8332-21|BIOUG66641-F07|BOLD:ABY1193  
 Ephydriidae|GMPJA5245-21|BIOUG66609-B08|BOLD:ABY1193  
 Ephydriidae|GMPJA8377-21|BIOUG66642-B05|BOLD:ABY1193  
 Ephydriidae|GMPJA5168-21|BIOUG66608-D02|BOLD:ABY1193  
 Ephydriidae|GMPJA4384-21|BIOUG66601-B02|BOLD:ABY1193  
 Ephydriidae|GMPJA4114-21|BIOUG65698-C05|BOLD:ABY1193  
 Ephydriidae|GMPJA4524-21|BIOUG66602-E11|BOLD:ABY1193  
 Ephydriidae|GMPJA6489-21|BIOUG66622-C05|BOLD:ABY1193  
 Ephydriidae|GMPJA8501-21|BIOUG66643-D10|BOLD:ABY1193  
 Ephydriidae|GMPJA5451-21|BIOUG66611-C12|BOLD:ABY1193  
 Ephydriidae|GMPJA6701-21|BIOUG66624-E03|BOLD:ABY1193  
 Ephydriidae|GMPJA7654-21|BIOUG66634-E06|BOLD:ABY1193  
 Ephydriidae|GMPJA5240-21|BIOUG66609-B03|BOLD:ABY1193  
 Ephydriidae|GMPJA5169-21|BIOUG66608-D03|BOLD:ABY1193  
 Ephydriidae|GMPJA8523-21|BIOUG66643-F08|BOLD:ABY1193  
 Ephydriidae|GMPJA7354-21|BIOUG66631-D03|BOLD:ABY1193  
 Ephydriidae|GMPJA10539-21|BIOUG70235-F08|BOLD:ABY1193  
 Ephydriidae|GMPJA8735-21|BIOUG66645-H06|BOLD:ABY1193  
 Ephydriidae|GMPJA8630-21|BIOUG66644-G08|BOLD:ABY1193  
 Ephydriidae|GMPJA6741-21|BIOUG66624-H07|BOLD:ABY1193  
 Ephydriidae|GMPJA5148-21|BIOUG66608-B06|BOLD:ABY1193  
 Ephydriidae|GMPJA5449-21|BIOUG66611-C10|BOLD:ABY1193  
 Ephydriidae|GMPJA4373-21|BIOUG66601-A03|BOLD:ABY1193  
 Ephydriidae|GMPJA5058-21|BIOUG66607-B11|BOLD:ABY1193  
 Ephydriidae|GMPJA5042-21|BIOUG66607-A07|BOLD:ABY1193  
 Mycodrosophila aqua|GMPJA8636-21|BIOUG66644-H02|BOLD:AFC0769  
 Drosophilidae|GMPJA7376-21|BIOUG66631-F01|BOLD:ACG8597  
 Drosophila simulans|GMPJA1481-21|BIOUG65671-A07|BOLD:AAE8098  
 Drosophila simulans|GMPJA1969-21|BIOUG65676-B08|BOLD:AAE8098  
 Drosophila simulans|GMPJA1526-21|BIOUG65671-E04|BOLD:AAE8098  
 Drosophila simulans|GMPJA1757-21|BIOUG65673-H09|BOLD:AAE8098  
 Drosophila simulans|GMPJA1762-21|BIOUG65674-A03|BOLD:AAE8098  
 Drosophila simulans|GMPJA1808-21|BIOUG65674-E01|BOLD:AAE8098  
 Drosophila simulans|GMPJA1410-21|BIOUG65670-C07|BOLD:AAE8098  
 Drosophila simulans|GMPJA1349-21|BIOUG65669-F05|BOLD:AAE8098  
 Drosophila takahashii|GMPJA3319-21|BIOUG65689-H05|BOLD:AAU0289  
 Drosophila|GMPJA1285-21|BIOUG65669-A01|BOLD:ACE9640

\*Drosophila simulans|GMPJA1349-21|BIOUG65669-F05|BOLD:AAE8098  
 Drosophila takahashii|GMPJA3319-21|BIOUG65689-H05|BOLD:AAU0289  
 Drosophila|GMPJA1285-21|BIOUG65669-A01|BOLD:ACE9640  
 Drosophila|GMPJA2448-21|BIOUG65681-B12|BOLD:ACE9640  
 Drosophila|GMPJA2444-21|BIOUG65681-B08|BOLD:ACE9640  
 Sarcophagidae|GMPJA4360-21|BIOUG65700-H01|BOLD:AEJ8819  
 Sarcophagidae|GMPJA5362-21|BIOUG66610-D06|BOLD:ACA1194  
 Sarcophagidae|GMPJA4123-21|BIOUG65698-D02|BOLD:ACA1194  
 Sarcophagidae|GMPJA5672-21|BIOUG66613-F07|BOLD:ACA1194  
 Sarcophagidae|GMPJA6769-21|BIOUG66625-B12|BOLD:ACA1194  
 Sarcophagidae|GMPJA5223-21|BIOUG66608-H09|BOLD:ACA1194  
 Sarcophagidae|GMPJA5386-21|BIOUG66610-F06|BOLD:ACA1194  
 Sarcophagidae|GMPJA5315-21|BIOUG66609-H06|BOLD:ACA1194  
 Sarcophagidae|GMPJA7221-21|BIOUG66630-A01|BOLD:ACA1194  
 Sarcophagidae|GMPJA6366-21|BIOUG66621-A01|BOLD:ACA1194  
 Sarcophagidae|GMPJA6371-21|BIOUG66621-A06|BOLD:ACA1194  
 Sarcophagidae|GMPJA6502-21|BIOUG66622-D06|BOLD:ACA1194  
 Sarcophagidae|GMPJA6628-21|BIOUG66623-G01|BOLD:ACA1194  
 Sarcophagidae|GMPJA6640-21|BIOUG66623-H01|BOLD:ACA1194  
 Sarcophagidae|GMPJA6711-21|BIOUG66624-F01|BOLD:ACA1194  
 Sarcophagidae|GMPJA6817-21|BIOUG66625-F12|BOLD:ACA1194  
 Sarcophagidae|GMPJA7685-21|BIOUG66634-H01|BOLD:ACA1194  
 Sarcophagidae|GMPJA7851-21|BIOUG66636-F01|BOLD:ACA1194  
 Sarcophagidae|GMPJA3135-21|BIOUG65687-H11|BOLD:ACA1194  
 Sarcophagidae|GMPJA10103-21|BIOUG66563-B01|BOLD:ACA1194  
 Sarcophagidae|GMPJA10162-21|BIOUG66563-F12|BOLD:ACA1194  
 Sarcophagidae|GMPJA4502-21|BIOUG66602-D01|BOLD:ACA1194  
 Sarcophagidae|GMPJA4276-21|BIOUG65700-A01|BOLD:ACA1194  
 Sarcophagidae|GMPJA4394-21|BIOUG66601-B12|BOLD:ACA1194  
 Sarcophagidae|GMPJA3616-21|BIOUG65693-A06|BOLD:ACA1194  
 Sarcophagidae|GMPJA4063-21|BIOUG65697-G01|BOLD:ACA1194  
 Sarcophagidae|GMPJA4085-21|BIOUG65697-H11|BOLD:ACA1194  
 Sarcophagidae|GMPJA4371-21|BIOUG66601-A01|BOLD:ACA1194  
 Sarcophagidae|GMPJA6794-21|BIOUG66625-E01|BOLD:ACA1194  
 Sarcophagidae|GMPJA6282-21|BIOUG66620-A12|BOLD:ACA1194  
 Sarcophagidae|GMPJA6266-21|BIOUG66619-H07|BOLD:ACA1194  
 Sarcophagidae|GMPJA6743-21|BIOUG66624-H09|BOLD:ACA1194  
 Sarcophagidae|GMPJA6197-21|BIOUG66619-B10|BOLD:ACA1194  
 Sarcophagidae|GMPJA5893-21|BIOUG66616-A03|BOLD:ACA1194  
 Sarcophagidae|GMPJA5892-21|BIOUG66616-A02|BOLD:ACA1194  
 Sarcophagidae|GMPJA5677-21|BIOUG66613-F12|BOLD:ACA1194  
 Sarcophagidae|GMPJA5675-21|BIOUG66613-F10|BOLD:ACA1194  
 Sarcophagidae|GMPJA5673-21|BIOUG66613-F08|BOLD:ACA1194  
 Sarcophagidae|GMPJA5671-21|BIOUG66613-F06|BOLD:ACA1194  
 Sarcophagidae|GMPJA5670-21|BIOUG66613-F05|BOLD:ACA1194  
 Sarcophagidae|GMPJA5155-21|BIOUG66608-C01|BOLD:ACA1194  
 Sarcophagidae|GMPJA5120-21|BIOUG66607-H01|BOLD:ACA1194  
 Sarcophagidae|GMPJA5345-21|BIOUG66610-C01|BOLD:ACA1194  
 Sarcophagidae|GMPJA6650-21|BIOUG66623-H11|BOLD:ACA1194  
 Sarcophagidae|GMPJA6791-21|BIOUG66625-D10|BOLD:ACA1194  
 Sarcophagidae|GMPJA6846-21|BIOUG66626-A06|BOLD:ACA1194  
 Sarcophagidae|GMPJA8243-21|BIOUG66640-G01|BOLD:ACA1194  
 Sarcophagidae|GMPJA8657-21|BIOUG66645-A12|BOLD:ACA1194  
 Sarcophagidae|GMPJA10164-21|BIOUG66563-G02|BOLD:ACA1194  
 Sarcophagidae|GMPJA4572-21|BIOUG66603-A12|BOLD:ACA1194  
 Sarcophagidae|GMPJA1333-21|BIOUG65669-E01|BOLD:ACA1194  
 Sarcophagidae|GMPJA6505-21|BIOUG66622-D09|BOLD:ACA1194  
 Sarcophagidae|GMPJA6365-21|BIOUG66620-H11|BOLD:ACA1194  
 Sarcophagidae|GMPJA5129-21|BIOUG66607-H10|BOLD:ACA1194  
 Sarcophagidae|GMPJA5083-21|BIOUG66607-D12|BOLD:ACA1194  
 Sarcophagidae|GMPJA5381-21|BIOUG66610-F01|BOLD:ACA1194  
 Sarcophagidae|GMPJA5065-21|BIOUG66607-C06|BOLD:ACA1194  
 Sarcophagidae|GMPJA5676-21|BIOUG66613-F11|BOLD:ACA1194  
 Sarcophagidae|GMPJA5113-21|BIOUG66607-G06|BOLD:ACA1194  
 Sarcophagidae|GMPJA6259-21|BIOUG66619-G12|BOLD:ACA1194  
 Sarcophagidae|GMPJA6362-21|BIOUG66620-H08|BOLD:ACA1194  
 Sarcophagidae|GMPJA6279-21|BIOUG66620-A09|BOLD:ACA1194  
 Sarcophagidae|GMPJA6740-21|BIOUG66624-H06|BOLD:ACA1194  
 Sarcophagidae|GMPJA6195-21|BIOUG66619-B08|BOLD:ACA1194  
 Sarcophagidae|GMPJA6364-21|BIOUG66620-H10|BOLD:ACA1194  
 Sarcophagidae|GMPJA6363-21|BIOUG66620-H09|BOLD:ACA1194  
 Sarcophagidae|GMPJA7393-21|BIOUG66631-G06|BOLD:ACA1194  
 Sarcophagidae|GMPJA6597-21|BIOUG66623-D06|BOLD:ACA1194  
 Sarcophagidae|GMPJA7352-21|BIOUG66631-D01|BOLD:ACA1194  
 Sarcophagidae|GMPJA6908-21|BIOUG66626-F08|BOLD:ACA1194  
 Sarcophagidae|GMPJA8088-21|BIOUG66639-B01|BOLD:ACA1194  
 Sarcophagidae|GMPJA7998-21|BIOUG66638-B06|BOLD:ACA1194  
 Sarcophagidae|GMPJA10106-21|BIOUG66563-B04|BOLD:ACA1194  
 Sarcophagidae|GMPJA7553-21|BIOUG66633-D12|BOLD:ACA1194  
 Sarcophagidae|GMPJA10163-21|BIOUG66563-G01|BOLD:ACA1194  
 Sarcophagidae|GMPJA10109-21|BIOUG66563-B07|BOLD:ACA1194  
 Sarcophagidae|GMPJA6852-21|BIOUG66626-A12|BOLD:ACA1194  
 Sarcophagidae|GMPJA6835-21|BIOUG66625-H06|BOLD:ACA1194  
 Sarcophagidae|GMPJA10167-21|BIOUG66563-G05|BOLD:ACA1194  
 Sarcophagidae|GMPJA10165-21|BIOUG66563-G03|BOLD:ACA1194  
 Sarcophagidae|GMPJA3504-21|BIOUG65691-G12|BOLD:ACA1194  
 Sarcophagidae|GMPJA4181-21|BIOUG65699-A01|BOLD:ACA1194  
 Sarcophagidae|GMPJA4515-21|BIOUG66602-E02|BOLD:ACA1194  
 Sarcophagidae|GMPJA3029-21|BIOUG65686-G12|BOLD:ACA1194  
 Sarcophagidae|GMPXX030-21|BIOUG60809-D01|BOLD:ACA1194  
 Sarcophagidae|GMPXX137-21|BIOUG60810-D09|BOLD:ACA1194  
 Sarcophagidae|GMPXX138-21|BIOUG60810-D10|BOLD:ACA1194  
 Sarcophagidae|GMPXX139-21|BIOUG60810-D11|BOLD:ACA1194  
 Sarcophagidae|GMPXX026-21|BIOUG60809-C09|BOLD:ACA1194  
 Sarcophagidae|GMPXX022-21|BIOUG60809-C05|BOLD:ACA1194  
 Sarcophagidae|GMPJA4344-21|BIOUG65700-F09|BOLD:ACA1194  
 Sarcophagidae|GMPJA4347-21|BIOUG65700-F12|BOLD:ACA1194  
 Sarcophagidae|GMPJA3385-21|BIOUG65690-E12|BOLD:ACA1194  
 Sarcophagidae|GMPJA8740-21|BIOUG66645-H11|BOLD:ACA1194  
 Sarcophagidae|GMPJA6871-21|BIOUG66626-C07|BOLD:ACA1194  
 Sarcophagidae|GMPJA6526-21|BIOUG66622-F06|BOLD:ACA1194  
 Sarcophagidae|GMPJA6431-21|BIOUG66621-F06|BOLD:ACA1194  
 Sarcophagidae|GMPJA6443-21|BIOUG66621-G06|BOLD:ACA1194

Sarcophagidae|GMPJA6526-21|BIOUG66622-F06|BOLD:ACA1194  
 Sarcophagidae|GMPJA6431-21|BIOUG66621-F06|BOLD:ACA1194  
 Sarcophagidae|GMPJA6443-21|BIOUG66621-G06|BOLD:ACA1194  
 Sarcophagidae|GMPJA5310-21|BIOUG66609-H01|BOLD:ACA1194  
 Sarcophagidae|GMPJA5190-21|BIOUG66608-E12|BOLD:ACA1194  
 Sarcophagidae|GMPJA5102-21|BIOUG66607-F07|BOLD:ACA1194  
 Sarcophagidae|GMPJA5444-21|BIOUG66611-C05|BOLD:ACA1194  
 Sarcophagidae|GMPJA5410-21|BIOUG66610-H06|BOLD:ACA1194  
 Sarcophagidae|GMPJA5405-21|BIOUG66610-H01|BOLD:ACA1194  
 Sarcophagidae|GMPJA5084-21|BIOUG66607-E01|BOLD:ACA1194  
 Sarcophagidae|GMPJA5077-21|BIOUG66607-D06|BOLD:ACA1194  
 Sarcophagidae|GMPJA5059-21|BIOUG66607-B12|BOLD:ACA1194  
 Sarcophagidae|GMPJA6236-21|BIOUG66619-F01|BOLD:ACA1194  
 Sarcophagidae|GMPJA4443-21|BIOUG66601-G01|BOLD:ACA1194  
 Sarcophagidae|GMPJA4466-21|BIOUG66602-A01|BOLD:ACA1194  
 Sarcophagidae|GMPJA8467-21|BIOUG66643-A12|BOLD:ACA1194  
 Sarcophagidae|GMPJA4395-21|BIOUG66601-C01|BOLD:ACA1194  
 Sarcophagidae|GMPJA6853-21|BIOUG66626-B01|BOLD:ACA1194  
 Sarcophagidae|GMPJA6757-21|BIOUG66625-A12|BOLD:ACA1194  
 Sarcophagidae|GMPJA6194-21|BIOUG66619-B07|BOLD:ACA1194  
 Sarcophagidae|GMPJA5047-21|BIOUG66607-A12|BOLD:ACA1194  
 Sarcophagidae|GMPJA10010-21|BIOUG66658-H01|BOLD:ACP0237  
 Sarcophagidae|GMPJA7411-21|BIOUG66632-A01|BOLD:ACP0237  
 Sarcophagidae|GMPJA8876-21|BIOUG63985-E11|BOLD:ACP0237  
 Sarcophagidae|GMPJA5428-21|BIOUG66611-B01|BOLD:ACP0237  
 Sarcophaga|GMPJA8503-21|BIOUG66643-D12|BOLD:AAC4539  
 Sarcophaga|GMPJA7216-21|BIOUG66629-H07|BOLD:AAC4539  
 Sarcophaga|GMPJA10090-21|BIOUG63985-A08|BOLD:AAC4539  
 Sarcophaga|GMPJA10011-21|BIOUG66658-H02|BOLD:AAC4539  
 Sarcophaga|GMPJA7215-21|BIOUG66629-H06|BOLD:AAC4539  
 Sarcophaga|GMPJA6829-21|BIOUG66625-G12|BOLD:AAE9466  
 Sarcophaga|GMPJA10101-21|BIOUG66563-A11|BOLD:AAB4496  
 Sarcophaga|GMPJA006-21|BIOUG58255-A06|BOLD:AAE9461  
 Sarcophaga|GMPJA2908-21|BIOUG58255-E10|BOLD:AAE9461  
 Sarcophaga|GMPJA8872-21|BIOUG63985-E07|BOLD:AAC4540  
 Sarcophaga|GMPXX016-21|BIOUG60809-B11|BOLD:AAC4540  
 Sarcophaga|GMPXX017-21|BIOUG60809-B12|BOLD:AAC4540  
 Sarcophaga|GMPXX027-21|BIOUG60809-C10|BOLD:AAC4540  
 Sarcophaga|GMPXX021-21|BIOUG60809-C04|BOLD:AAC4540  
 Sarcophaga|GMPXX029-21|BIOUG60809-C12|BOLD:AAC4540  
 Sarcophaga|GMPXX019-21|BIOUG60809-C02|BOLD:AAC4540  
 Sarcophaga|GMPXX020-21|BIOUG60809-C03|BOLD:AAC4540  
 Sarcophaga|GMPXX032-21|BIOUG60809-D03|BOLD:AAC4540  
 Sarcophaga|GMPXX141-21|BIOUG60810-E01|BOLD:AAC4540  
 Sarcophaga|GMPXX140-21|BIOUG60810-D12|BOLD:AAC4540  
 Sarcophaga|GMPXX023-21|BIOUG60809-C06|BOLD:AAC4540  
 Sarcophaga|GMPXX031-21|BIOUG60809-D02|BOLD:AAC4540  
 Sarcophaga|GMPJA4938-21|BIOUG63984-H09|BOLD:AAC4540  
 Sarcophaga|GMPJA4931-21|BIOUG63984-H02|BOLD:AAC4540  
 Sarcophaga|GMPJA4902-21|BIOUG63984-E09|BOLD:ADT3984  
 Sarcophaga|GMPJA10102-21|BIOUG66563-A12|BOLD:AAI0975  
 Sarcophaga|GMPJA4804-21|BIOUG66605-E06|BOLD:AAI0975  
 Sarcophaga|GMPJA4802-21|BIOUG66605-E04|BOLD:AAI0975  
 Sarcophaga|GMPJA4803-21|BIOUG66605-E05|BOLD:AAI0975  
 Sarcophaga|GMPJA4805-21|BIOUG66605-E07|BOLD:AAI0975  
 Sarcophaga|GMPJA4890-21|BIOUG63984-D09|BOLD:AAI0975  
 Sarcophagidae|GMPJA6802-21|BIOUG66625-E09|BOLD:ACI9444  
 Sarcophagidae|GMPJA6592-21|BIOUG66623-D01|BOLD:AEJ2057  
 Atherigonal|GMPJA7589-21|BIOUG66633-G12|BOLD:ADH0509  
 Atherigonal|GMPJA4089-21|BIOUG65698-A04|BOLD:AAF5305  
 Atherigonal|GMPJA6705-21|BIOUG66624-E07|BOLD:AAF5305  
 Psilopa singaporensis|GMPJA396-21|BIOUG65659-F02|BOLD:AAP6562  
 Psilopa singaporensis|GMPJA7802-21|BIOUG66636-A12|BOLD:AAP6562  
 Psilopa singaporensis|GMPJA10353-21|BIOUG70233-F12|BOLD:AAP6562  
 Psilopa singaporensis|GMPJA7641-21|BIOUG66634-D05|BOLD:AAP6562  
 Psilopa singaporensis|GMPJA086-21|BIOUG65656-D01|BOLD:AAP6562  
 Psilopa singaporensis|GMPJA10243-21|BIOUG70232-E09|BOLD:AAP6562  
 Psilopa singaporensis|GMPJA8295-21|BIOUG66641-C06|BOLD:AAP6562  
 Psilopa singaporensis|GMPJA7833-21|BIOUG66636-D07|BOLD:AAP6562  
 Psilopa singaporensis|GMPJA7465-21|BIOUG66632-E07|BOLD:AAP6562  
 Psilopa singaporensis|GMPJA10364-21|BIOUG70233-G11|BOLD:AAP6562  
 Psilopa singaporensis|GMPJA7342-21|BIOUG66631-C03|BOLD:AAP6562  
 Psilopa singaporensis|GMPJA7321-21|BIOUG66631-A06|BOLD:AAP6562  
 Muscidae|GMPJA7988-21|BIOUG66638-A08|BOLD:AEK1113  
 Stomoxys calcitrans|GMPJA1665-21|BIOUG65673-A01|BOLD:ACI1304  
 Stomoxys calcitrans|GMPJA2330-21|BIOUG65680-A01|BOLD:ACI1304  
 Stomoxys calcitrans|GMPJA3415-21|BIOUG65690-H06|BOLD:ACI1304  
 Stomoxys calcitrans|GMPJA6490-21|BIOUG66622-C06|BOLD:ACI1304  
 Stomoxys calcitrans|GMPJA6383-21|BIOUG66621-B06|BOLD:ACI1304  
 Stomoxys calcitrans|GMPJA6437-21|BIOUG66621-F12|BOLD:ACI1304  
 Atherigonal|GMPJA10303-21|BIOUG70233-B10|BOLD:ACG2170  
 Atherigonal|GMPJA6634-21|BIOUG66623-G07|BOLD:ACG2170  
 Atherigonal|GMPJA6574-21|BIOUG66623-B07|BOLD:ACG2170  
 Atherigonal|GMPJA530-21|BIOUG65661-A06|BOLD:ACG2170  
 Atherigonal|GMPJA100-21|BIOUG65656-E03|BOLD:ACG2170  
 Atherigonal|GMPJA112-21|BIOUG65656-F03|BOLD:ACG2170  
 Atherigonal|GMPJA073-21|BIOUG65656-B12|BOLD:ACG2170  
 Atherigonal|GMPJA10267-21|BIOUG70232-G09|BOLD:ACG2170  
 Atherigonal|GMPJA10346-21|BIOUG70233-F05|BOLD:ACG2170  
 Atherigonal|GMPJA10298-21|BIOUG70233-B05|BOLD:ACG2170  
 Atherigonal|GMPJA10279-21|BIOUG70232-H09|BOLD:ACG2170  
 Atherigonal|GMPJA10249-21|BIOUG70232-F03|BOLD:ACG2170  
 Atherigonal|GMPJA8635-21|BIOUG66644-H01|BOLD:ACG2170  
 Atherigonal|GMPJA8366-21|BIOUG66642-A06|BOLD:ACG2170  
 Atherigonal|GMPJA8123-21|BIOUG66639-D12|BOLD:ACG2170  
 Atherigonal|GMPJA6839-21|BIOUG66625-H10|BOLD:ACG2170  
 Atherigonal|GMPJA7358-21|BIOUG66631-D07|BOLD:ACG2170  
 Atherigonal|GMPJA6790-21|BIOUG66625-D09|BOLD:ACG2170  
 Atherigonal|GMPJA6750-21|BIOUG66625-A05|BOLD:ACG2170  
 Atherigonal|GMPJA6535-21|BIOUG66622-G03|BOLD:ACG2170  
 Atherigonal|GMPJA1302-21|BIOUG65669-B06|BOLD:ABX0288  
 Atherigonal|GMPJA3041-21|BIOUG65687-A01|BOLD:ABX0288  
 Atherigonal|GMPJA1932-21|BIOUG65675-G06|BOLD:ABX0288

Atherigona|GMPJA1302-21|BIOUG65669-B06|BOLD:ABX0288  
 Atherigona|GMPJA3041-21|BIOUG65687-A01|BOLD:ABX0288  
 Atherigona|GMPJA1932-21|BIOUG65675-G06|BOLD:ABX0288  
 Atherigona|GMPJA1688-21|BIOUG65673-B12|BOLD:ABX0288  
 Atherigona|GMPJA5499-21|BIOUG66611-G12|BOLD:ABX0288  
 Muscidae|GMPJA6521-21|BIOUG66622-F01|BOLD:ACV1193  
 Atherigona reversura|GMPJA6797-21|BIOUG66625-E04|BOLD:AA8579  
 Atherigona reversura|GMPJA6719-21|BIOUG66624-F09|BOLD:AA8579  
 Atherigona reversura|GMPJA2357-21|BIOUG65680-C04|BOLD:AA8579  
 Atherigona reversura|GMPJA6663-21|BIOUG66624-B01|BOLD:AA8579  
 Atherigona reversura|GMPJA6753-21|BIOUG66625-A08|BOLD:AA8579  
 Atherigona reversura|GMPJA8147-21|BIOUG66639-F12|BOLD:AA8579  
 Atherigona reversura|GMPJA336-21|BIOUG65659-A02|BOLD:AA8579  
 Atherigona reversura|GMPJA6484-21|BIOUG66622-B12|BOLD:AA8579  
 Atherigona reversura|GMPJA6414-21|BIOUG66621-E01|BOLD:AA8579  
 Atherigona reversura|GMPJA3278-21|BIOUG65689-D12|BOLD:AA8579  
 Atherigona reversura|GMPJA3359-21|BIOUG65690-C10|BOLD:AA8579  
 Atherigona reversura|GMPJA922-21|BIOUG65665-B06|BOLD:AA8579  
 Atherigona reversura|GMPJA2389-21|BIOUG65680-E12|BOLD:AA8579  
 Atherigona reversura|GMPJA691-21|BIOUG65662-F12|BOLD:AA8579  
 Atherigona reversura|GMPJA6576-21|BIOUG66623-B09|BOLD:AA8579  
 Atherigona reversura|GMPJA10269-21|BIOUG70232-G11|BOLD:AA8579  
 Atherigona reversura|GMPJA6804-21|BIOUG66625-E11|BOLD:AA8579  
 Atherigona reversura|GMPJA6436-21|BIOUG66621-F11|BOLD:AA8579  
 Atherigona reversura|GMPJA6463-21|BIOUG66622-A03|BOLD:AA8579  
 Atherigona reversura|GMPJA6542-21|BIOUG66622-G10|BOLD:AA8579  
 Atherigona reversura|GMPJA6690-21|BIOUG66624-D04|BOLD:AA8579  
 Atherigona reversura|GMPJA6700-21|BIOUG66624-E02|BOLD:AA8579  
 Atherigona reversura|GMPJA7856-21|BIOUG66636-F06|BOLD:AA8579  
 Atherigona reversura|GMPJA8479-21|BIOUG66643-B12|BOLD:AA8579  
 Atherigona reversura|GMPJA3360-21|BIOUG65690-C11|BOLD:AA8579  
 Atherigona reversura|GMPJA418-21|BIOUG65659-G12|BOLD:AA8579  
 Atherigona reversura|GMPJA8679-21|BIOUG66645-C10|BOLD:AA8579  
 Atherigona reversura|GMPJA6763-21|BIOUG66625-B06|BOLD:AA8579  
 Atherigona reversura|GMPJA5343-21|BIOUG66610-B11|BOLD:AA8579  
 Atherigona|GMPJA2008-21|BIOUG65676-E11|BOLD:ABX4632  
 Atherigona|GMPJA6462-21|BIOUG66622-A02|BOLD:AAG1745  
 Atherigona|GMPJA6445-21|BIOUG66621-G08|BOLD:AAG1745  
 Muscidae|GMPJA10325-21|BIOUG70233-D08|BOLD:ACV8099  
 Atherigona|GMPJA6498-21|BIOUG66622-D02|BOLD:ACJ5809  
 Atherigona|GMPJA5463-21|BIOUG66611-D12|BOLD:ACJ5809  
 Atherigona|GMPJA5427-21|BIOUG66611-A12|BOLD:ACJ5809  
 Atherigona|GMPJA7600-21|BIOUG66633-H11|BOLD:ACJ5809  
 Atherigona|GMPJA5075-21|BIOUG66607-D04|BOLD:ACJ5809  
 Orchisia costata|GMPJA1469-21|BIOUG65670-H06|BOLD:ABX0213  
 Orchisia costata|GMPJA10527-21|BIOUG70235-E08|BOLD:ABX0213  
 Diptera|GMPJA2187-21|BIOUG65678-D12  
 Limnophora|GMPJA6901-21|BIOUG66626-F01|BOLD:ACN3496  
 Limnophora|GMPJA6695-21|BIOUG66624-D09|BOLD:ACN3496  
 Limnophora|GMPJA6623-21|BIOUG66623-F08|BOLD:ACN3496  
 Limnophora|GMPJA6416-21|BIOUG66621-E03|BOLD:ACN3496  
 Melanostoma fasciatum|GMPJA3634-21|BIOUG65693-B12|BOLD:ABY6279  
 Melanostoma fasciatum|GMPJA1926-21|BIOUG65675-F12|BOLD:ABY6279  
 Melanostoma fasciatum|GMPJA168-21|BIOUG65657-B12|BOLD:ABY6279  
 Melanostoma fasciatum|GMPJA3308-21|BIOUG65689-G06|BOLD:ABY6279  
 Sarcophagidae|GMPJA10278-21|BIOUG70232-H08|BOLD:AEL5012  
 Tachinidae|GMPJA6885-21|BIOUG66626-D09|BOLD:ACU7511  
 Hemipyrellia|GMPJA005-21|BIOUG58255-A05|BOLD:AAE4423  
 Hemipyrellia|GMPJA8871-21|BIOUG63985-E06|BOLD:AAE4423  
 Sarcophagidae|GMPJA4056-21|BIOUG65697-F06|BOLD:ACB4981  
 Sarcophagidae|GMPJA4806-21|BIOUG66605-E08|BOLD:ACB4981  
 Sarcophagidae|GMPJA7506-21|BIOUG66633-A01|BOLD:ACB4981  
 Sarcophagidae|GMPJA6735-21|BIOUG66624-H01|BOLD:ACB4981  
 Sarcophagidae|GMPJA4075-21|BIOUG65697-H01|BOLD:ACB4981  
 Sarcophagidae|GMPJA6561-21|BIOUG66623-A06|BOLD:ACB4981  
 Sarcophagidae|GMPJA5674-21|BIOUG66613-F09|BOLD:ACB4981  
 Sarcophagidae|GMPJA5332-21|BIOUG66610-A12|BOLD:ACB4981  
 Sarcophagidae|GMPJA5071-21|BIOUG66607-C12|BOLD:ACB4981  
 Anthomyia illocata|GMPJA1392-21|BIOUG65670-B01|BOLD:ACD8455  
 Anthomyia illocata|GMPJA068-21|BIOUG65656-B07|BOLD:ACD8455  
 Anthomyia illocata|GMPJA3090-21|BIOUG65687-E02|BOLD:ACD8455  
 Calliphoridae|GMPJA4465-21|BIOUG66601-H11|BOLD:ACA4119  
 Calliphoridae|GMPJA10115-21|BIOUG66563-C01|BOLD:ACA4119  
 Calliphoridae|GMPJA10104-21|BIOUG66563-B02|BOLD:ACA4119  
 Calliphoridae|GMPJA6793-21|BIOUG66625-D12|BOLD:ACA4119  
 Calliphoridae|GMPJA6770-21|BIOUG66625-C01|BOLD:ACA4119  
 Bengalia|GMPJA6734-21|BIOUG66624-G12|BOLD:ACX7944  
 Anthomyiidae|GMPJA536-21|BIOUG65661-A12|BOLD:AAZ4294  
 Anthomyiidae|GMPJA1059-21|BIOUG65666-E12|BOLD:AAZ4294  
 Anthomyiidae|GMPJA1060-21|BIOUG65666-F01|BOLD:AAZ4294  
 Anthomyiidae|GMPJA1089-21|BIOUG65666-H06|BOLD:AAZ4294  
 Anthomyiidae|GMPJA1130-21|BIOUG65667-C12|BOLD:AAZ4294  
 Anthomyiidae|GMPJA1356-21|BIOUG65669-F12|BOLD:AAZ4294  
 Anthomyiidae|GMPJA2224-21|BIOUG65678-H01|BOLD:AAZ4294  
 Anthomyiidae|GMPJA2306-21|BIOUG65679-F12|BOLD:AAZ4294  
 Anthomyiidae|GMPJA2335-21|BIOUG65680-A06|BOLD:AAZ4294  
 Anthomyiidae|GMPJA2140-21|BIOUG65678-A01|BOLD:AAZ4294  
 Anthomyiidae|GMPJA1040-21|BIOUG65666-D05|BOLD:AAZ4294  
 Anthomyiidae|GMPJA3444-21|BIOUG65691-B12|BOLD:AAZ4294  
 Anthomyiidae|GMPJA156-21|BIOUG65657-A12|BOLD:AAZ4294  
 Anthomyiidae|GMPJA079-21|BIOUG65656-C06|BOLD:AAZ4294  
 Anthomyiidae|GMPJA069-21|BIOUG65656-B08|BOLD:AAZ4294  
 Anthomyiidae|GMPJA514-21|BIOUG65660-H01|BOLD:AAZ4294  
 Anthomyiidae|GMPJA441-21|BIOUG65660-A12|BOLD:AAZ4294  
 Anthomyiidae|GMPJA3609-21|BIOUG65692-H10|BOLD:AAZ4294  
 Anthomyiidae|GMPJA3539-21|BIOUG65692-B12|BOLD:AAZ4294  
 Anthomyiidae|GMPJA3433-21|BIOUG65691-B01|BOLD:AAZ4294  
 Anthomyiidae|GMPJA3367-21|BIOUG65690-D06|BOLD:AAZ4294  
 Anthomyiidae|GMPJA3207-21|BIOUG65688-F12|BOLD:AAZ4294  
 Anthomyiidae|GMPJA715-21|BIOUG65663-A01|BOLD:AAZ4294  
 Anthomyiidae|GMPJA1297-21|BIOUG65669-B01|BOLD:AAZ4294  
 Anthomyiidae|GMPJA3343-21|BIOUG65690-B06|BOLD:AAZ4294  
 Anthomyiidae|GMPJA2398-21|BIOUG65680-F09|BOLD:AAZ4294

Anthomyiidae|GMPJA1297-21|BIOUG65669-B01|BOLD:AAZ4294  
 Anthomyiidae|GMPJA3343-21|BIOUG65690-B06|BOLD:AAZ4294  
 Anthomyiidae|GMPJA2398-21|BIOUG65680-F09|BOLD:AAZ4294  
 Anthomyiidae|GMPJA989-21|BIOUG65665-H01|BOLD:AAZ4294  
 Anthomyiidae|GMPJA3337-21|BIOUG65690-A12|BOLD:AAZ4294  
 Anthomyiidae|GMPJA3325-21|BIOUG65689-H11|BOLD:AAZ4294  
 Anthomyiidae|GMPJA494-21|BIOUG65660-F05|BOLD:AAZ4294  
 Anthomyiidae|GMPJA117-21|BIOUG65656-F08|BOLD:AAZ4294  
 Anthomyiidae|GMPJA3510-21|BIOUG65691-H06|BOLD:AAZ4294  
 Anthomyiidae|GMPJA3320-21|BIOUG65689-H06|BOLD:AAZ4294  
 Anthomyiidae|GMPJA3315-21|BIOUG65689-H01|BOLD:AAZ4294  
 Anthomyiidae|GMPJA3254-21|BIOUG65689-B12|BOLD:AAZ4294  
 Anthomyiidae|GMPJA1308-21|BIOUG65669-B12|BOLD:AAZ4294  
 Anthomyiidae|GMPJA162-21|BIOUG65657-B06|BOLD:AAZ4294  
 Anthomyiidae|GMPJA1345-21|BIOUG65669-F01|BOLD:AAZ4294  
 Anthomyiidae|GMPJA1072-21|BIOUG65666-G01|BOLD:AAZ4294  
 Anthomyiidae|GMPJA1065-21|BIOUG65666-F06|BOLD:AAZ4294  
 Anthomyiidae|GMPJA1036-21|BIOUG65666-D01|BOLD:AAZ4294  
 Anthomyiidae|GMPJA1409-21|BIOUG65670-C06|BOLD:AAZ4294  
 Anthomyiidae|GMPJA1570-21|BIOUG65672-A01|BOLD:AAZ4294  
 Anthomyiidae|GMPJA1581-21|BIOUG65672-A12|BOLD:AAZ4294  
 Anthomyiidae|GMPJA2294-21|BIOUG65679-E12|BOLD:AAZ4294  
 Anthomyiidae|GMPJA2092-21|BIOUG65677-D12|BOLD:AAZ4294  
 Anthomyiidae|GMPJA2098-21|BIOUG65677-E06|BOLD:AAZ4294  
 Anthomyiidae|GMPJA2401-21|BIOUG65680-F12|BOLD:AAZ4294  
 Anthomyiidae|GMPJA2044-21|BIOUG65676-H11|BOLD:AAZ4294  
 Anthomyiidae|GMPJA3246-21|BIOUG65689-B04|BOLD:AAZ4294  
 Anthomyiidae|GMPJA3158-21|BIOUG65688-B11|BOLD:AAZ4294  
 Adia cinerella|GMPJA2247-21|BIOUG65679-B01|BOLD:AAG2452  
 Adia cinerella|GMPJA1771-21|BIOUG65674-A12|BOLD:AAG2452  
 Adia cinerella|GMPJA1428-21|BIOUG65670-E01|BOLD:AAG2452  
 Adia cinerella|GMPJA1915-21|BIOUG65675-F01|BOLD:AAG2452  
 Adia cinerella|GMPJA1053-21|BIOUG65666-E06|BOLD:AAG2452  
 Adia cinerella|GMPJA1071-21|BIOUG65666-F12|BOLD:AAG2452  
 Adia cinerella|GMPJA1357-21|BIOUG65669-G01|BOLD:AAG2452  
 Adia cinerella|GMPJA958-21|BIOUG65665-E06|BOLD:AAG2452  
 Adia cinerella|GMPJA1403-21|BIOUG65670-B12|BOLD:AAG2452  
 Adia cinerella|GMPJA1029-21|BIOUG65666-C06|BOLD:AAG2452  
 Adia cinerella|GMPJA1416-21|BIOUG65670-D01|BOLD:AAG2452  
 Adia cinerella|GMPJA1713-21|BIOUG65673-E01|BOLD:AAG2452  
 Adia cinerella|GMPJA934-21|BIOUG65665-C06|BOLD:AAG2452  
 Chrysomya|GMPJA4888-21|BIOUG63984-D07|BOLD:AAA5667  
 Chrysomya|GMPJA004-21|BIOUG58255-A04|BOLD:AAA5667  
 Chrysomya|GMPJA4887-21|BIOUG63984-D06|BOLD:AAA5667  
 Chrysomya|GMPJA4889-21|BIOUG63984-D08|BOLD:AAA5667  
 Chrysomya|GMPJA4886-21|BIOUG63984-D05|BOLD:AAA5667  
 Delia|GMPJA1789-21|BIOUG65674-C06|BOLD:AAG2511  
 Delia|GMPJA940-21|BIOUG65665-C12|BOLD:AAG2511  
 Delia|GMPJA953-21|BIOUG65665-E01|BOLD:AAG2511  
 Delia|GMPJA1718-21|BIOUG65673-E06|BOLD:AAG2511  
 Delia|GMPJA727-21|BIOUG65663-B01|BOLD:AAG2511  
 Delia|GMPJA1023-21|BIOUG65666-B12|BOLD:AAG2511  
 Delia|GMPJA744-21|BIOUG65663-C06|BOLD:AAG2511  
 Delia|GMPJA917-21|BIOUG65665-B01|BOLD:AAG2511  
 Delia|GMPJA407-21|BIOUG65659-G01|BOLD:AAG2511  
 Delia|GMPJA525-21|BIOUG65661-A01|BOLD:AAG2511  
 Delia|GMPJA2128-21|BIOUG65677-G12|BOLD:AAG2511  
 Delia|GMPJA1094-21|BIOUG65666-H11|BOLD:AAG2511  
 Delia|GMPJA1167-21|BIOUG65667-G01|BOLD:AAG2511  
 Delia|GMPJA946-21|BIOUG65665-D06|BOLD:AAG2511  
 Delia|GMPJA1202-21|BIOUG65668-B01|BOLD:AAG2511  
 Delia|GMPJA1011-21|BIOUG65666-A12|BOLD:AAG2511  
 Delia|GMPJA988-21|BIOUG65665-G12|BOLD:AAG2511  
 Delia|GMPJA739-21|BIOUG65663-C01|BOLD:AAG2511  
 Delia|GMPJA1296-21|BIOUG65669-A12|BOLD:AAG2511  
 Delia|GMPJA1048-21|BIOUG65666-E01|BOLD:AAG2511  
 Delia|GMPJA1047-21|BIOUG65666-D12|BOLD:AAG2511  
 Delia|GMPJA1017-21|BIOUG65666-B06|BOLD:AAG2511  
 Delia|GMPJA1012-21|BIOUG65666-B01|BOLD:AAG2511  
 Delia|GMPJA1035-21|BIOUG65666-C12|BOLD:AAG2511  
 Delia|GMPJA1024-21|BIOUG65666-C01|BOLD:AAG2511  
 Delia|GMPJA1107-21|BIOUG65667-B01|BOLD:AAG2511  
 Delia|GMPJA1112-21|BIOUG65667-B06|BOLD:AAG2511  
 Delia|GMPJA1124-21|BIOUG65667-C06|BOLD:AAG2511  
 Delia|GMPJA1154-21|BIOUG65667-E12|BOLD:AAG2511  
 Delia|GMPJA1160-21|BIOUG65667-F06|BOLD:AAG2511  
 Delia|GMPJA1166-21|BIOUG65667-F12|BOLD:AAG2511  
 Delia|GMPJA1368-21|BIOUG65669-G12|BOLD:AAG2511  
 Delia|GMPJA1404-21|BIOUG65670-C01|BOLD:AAG2511  
 Delia|GMPJA1439-21|BIOUG65670-E12|BOLD:AAG2511  
 Delia|GMPJA1452-21|BIOUG65670-G01|BOLD:AAG2511  
 Delia|GMPJA952-21|BIOUG65665-D12|BOLD:AAG2511  
 Delia|GMPJA371-21|BIOUG65659-D01|BOLD:AAG2511  
 Delia|GMPJA941-21|BIOUG65665-D01|BOLD:AAG2511  
 Delia|GMPJA916-21|BIOUG65665-A12|BOLD:AAG2511  
 Delia|GMPJA2473-21|BIOUG65681-E01|BOLD:AAG2511  
 Delia|GMPJA1369-21|BIOUG65669-H01|BOLD:AAG2511  
 Delia|GMPJA1041-21|BIOUG65666-D06|BOLD:AAG2511  
 Delia|GMPJA2769-21|BIOUG65684-E12|BOLD:AAG2511  
 Delia|GMPJA1587-21|BIOUG65672-B06|BOLD:AAG2511  
 Delia|GMPJA2295-21|BIOUG65679-F01|BOLD:AAG2511  
 Delia|GMPJA1623-21|BIOUG65672-E06|BOLD:AAG2511  
 Delia|GMPJA1618-21|BIOUG65672-E01|BOLD:AAG2511  
 Delia|GMPJA1119-21|BIOUG65667-C01|BOLD:AAG2511  
 Delia|GMPJA1095-21|BIOUG65667-A01|BOLD:AAG2511  
 Delia|GMPJA1077-21|BIOUG65666-G06|BOLD:AAG2511  
 Delia|GMPJA513-21|BIOUG65660-G12|BOLD:AAG2511  
 Delia|GMPJA127-21|BIOUG65656-G06|BOLD:AAG2511  
 Delia|GMPJA2436-21|BIOUG65681-A12|BOLD:AAG2511  
 Asteia amoena|GMPJA3188-21|BIOUG65688-E05|BOLD:ACG0368  
 Asteia amoena|GMPJA4160-21|BIOUG65698-G03|BOLD:ACG0368  
 Asteia amoena|GMPJA3576-21|BIOUG65692-F01|BOLD:ACG0368  
 Asteia amoena|GMPJA2392-21|BIOUG65680-F04|BOLD:ACG0368

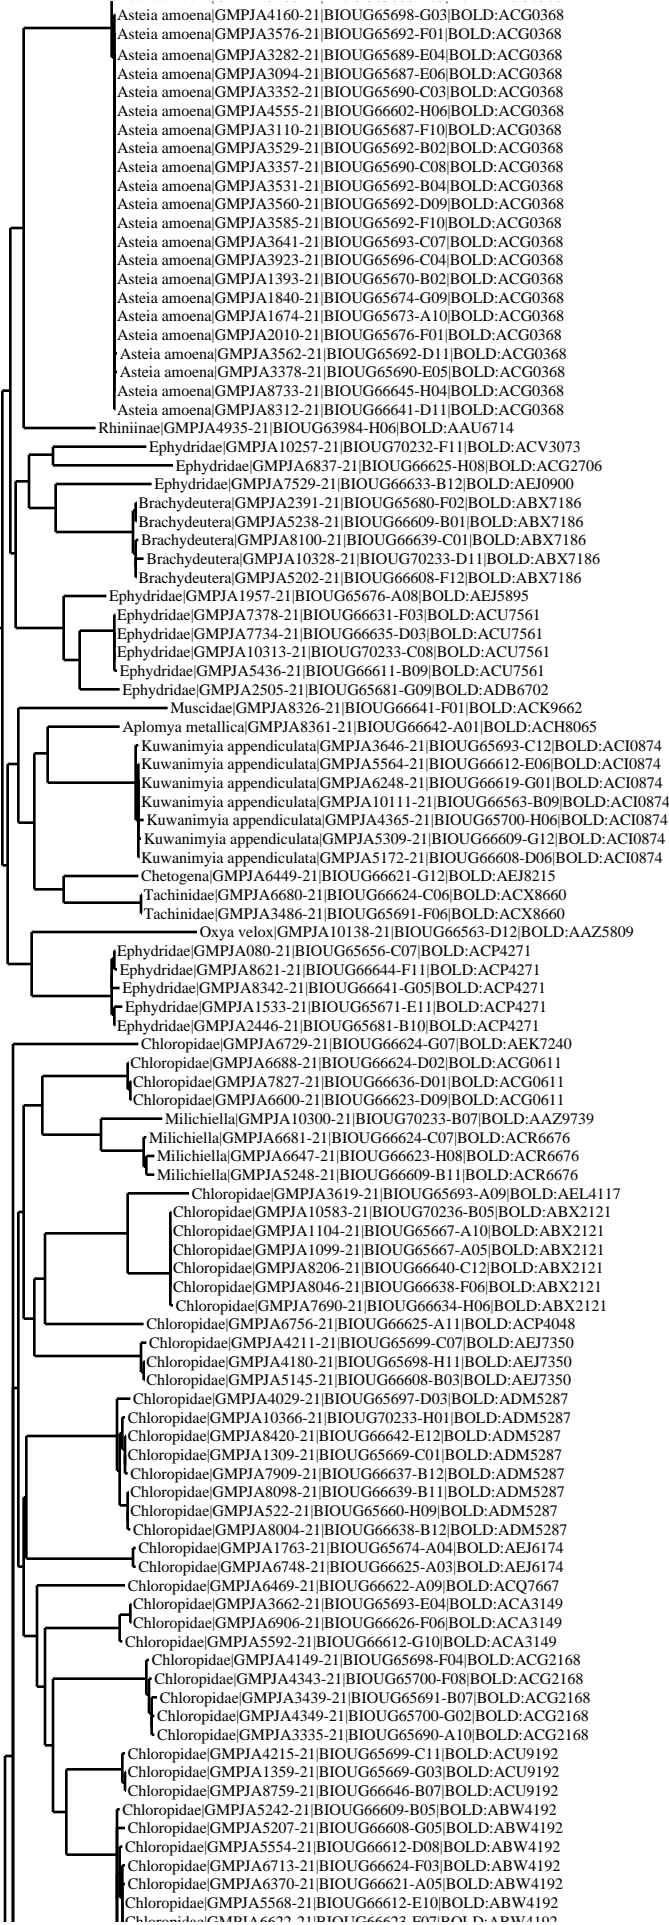

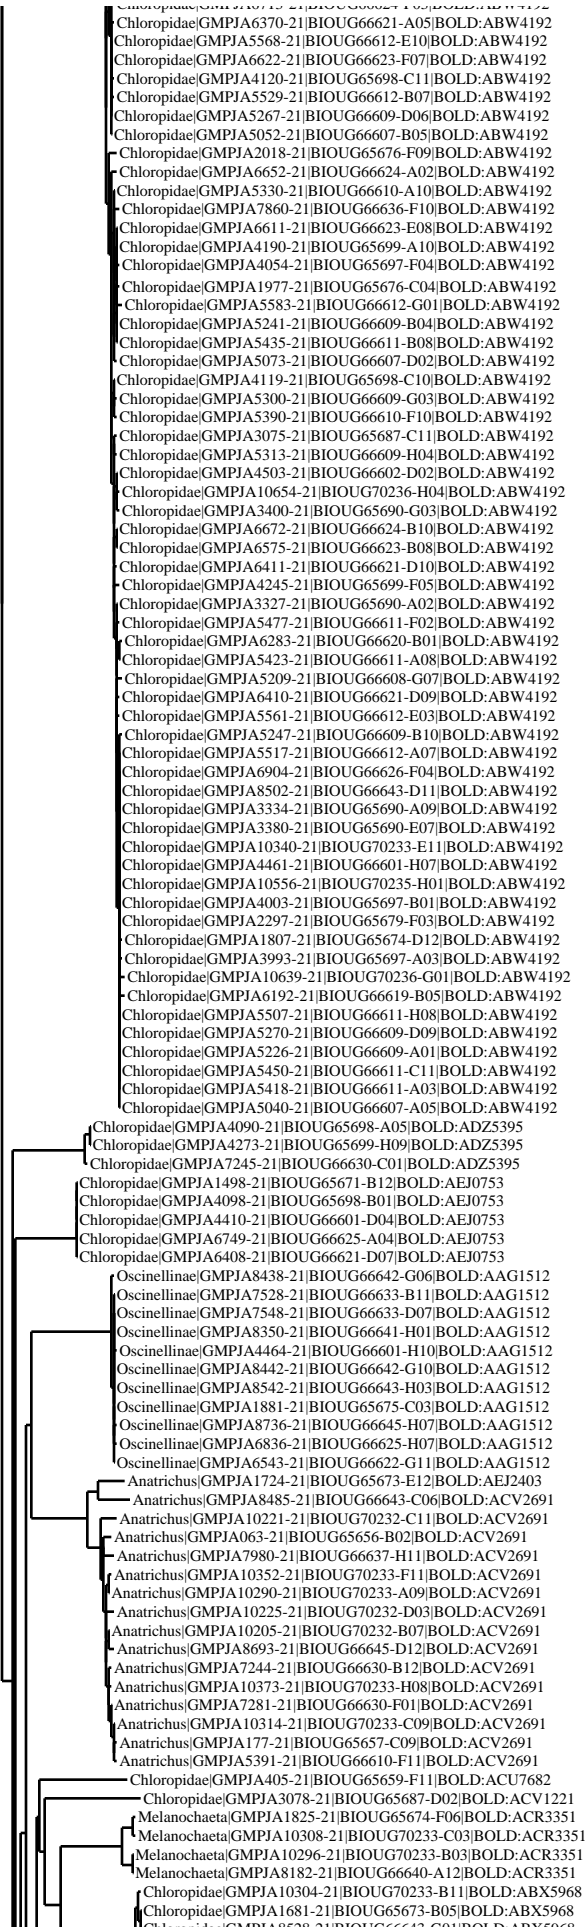

Chloropidae|GMPJA10304-21|BIOUG70233-B11|BOLD:ABX5968  
Chloropidae|GMPJA1681-21|BIOUG65673-B05|BOLD:ABX5968  
Chloropidae|GMPJA8528-21|BIOUG66643-G01|BOLD:ABX5968  
Chloropidae|GMPJA377-21|BIOUG65659-D07|BOLD:ABX5968  
Chloropidae|GMPJA10345-21|BIOUG70233-F04|BOLD:ABX5968  
Chloropidae|GMPJA1795-21|BIOUG65674-C12|BOLD:ABX5968  
Chloropidae|GMPJA372-21|BIOUG65659-D02|BOLD:ABX5968  
Chloropidae|GMPJA2388-21|BIOUG65680-E11|BOLD:ABX5968  
Chloropidae|GMPJA10281-21|BIOUG70232-H11|BOLD:ABX5968  
Chloropidae|GMPJA7979-21|BIOUG66637-H10|BOLD:ABX5968  
Chloropidae|GMPJA7332-21|BIOUG66631-B05|BOLD:ABX5968  
Cadrema|GMPJA8083-21|BIOUG66639-A08|BOLD:AAF5121  
Cadrema|GMPJA6696-21|BIOUG66624-D10|BOLD:AAF5121  
Cadrema|GMPJA6615-21|BIOUG66623-E12|BOLD:AAF5121  
Cadrema|GMPJA7308-21|BIOUG66630-H04|BOLD:AAF5121  
Cadrema|GMPJA6764-21|BIOUG66625-B07|BOLD:AAF5121  
Cadrema|GMPJA6512-21|BIOUG66622-E04|BOLD:AAF5121  
Cadrema|GMPJA7333-21|BIOUG66631-B06|BOLD:AAF5121  
Cadrema|GMPJA7669-21|BIOUG66634-F09|BOLD:AAF5121  
Cadrema|GMPJA8348-21|BIOUG66641-G11|BOLD:AAF5121  
Cadrema|GMPJA8290-21|BIOUG66641-C01|BOLD:AAF5121  
Cadrema|GMPJA8771-21|BIOUG66646-C07|BOLD:AAF5121  
Cadrema|GMPJA10193-21|BIOUG70232-A07|BOLD:AAF5121  
Cadrema|GMPJA10547-21|BIOUG70235-G04|BOLD:AAF5121  
Cadrema|GMPJA10597-21|BIOUG70236-C07|BOLD:AAF5121  
Cadrema|GMPJA1532-21|BIOUG65671-E10|BOLD:AAF5121  
Cadrema|GMPJA7706-21|BIOUG66635-A11|BOLD:AAF5121  
Cadrema|GMPJA6191-21|BIOUG66619-B04|BOLD:AAF5121  
Chloropidae|GMPJA1701-21|BIOUG65673-D01|BOLD:ACA3146  
Chloropidae|GMPJA5164-21|BIOUG66608-C10|BOLD:ACA3146  
Chloropidae|GMPJA6548-21|BIOUG66622-H04|BOLD:ACG2169  
Chloropidae|GMPJA5128-21|BIOUG66607-H09|BOLD:ACP2616  
Chloropidae|GMPJA5358-21|BIOUG66610-D02|BOLD:ACP9016  
Siphunculina striolata|GMPJA509-21|BIOUG65660-G08|BOLD:ADZ3871  
Chloropidae|GMPJA8690-21|BIOUG66645-D09|BOLD:AEL6471  
Chloropidae|GMPJA5288-21|BIOUG66609-F03|BOLD:ACG0241  
Chloropidae|GMPJA7863-21|BIOUG66636-G01|BOLD:ACG0241  
Chloropidae|GMPJA5244-21|BIOUG66609-B07|BOLD:ACG0241  
Chloropidae|GMPJA8649-21|BIOUG66645-A04|BOLD:ACG0241  
Chloropidae|GMPJA7283-21|BIOUG66630-F03|BOLD:ACG0241  
Chloropidae|GMPJA5382-21|BIOUG66610-F02|BOLD:ACG0241  
Chloropidae|GMPJA7618-21|BIOUG66634-B06|BOLD:ACG0241  
Chloropidae|GMPJA8200-21|BIOUG66640-C06|BOLD:ACG0241  
Chloropidae|GMPJA7873-21|BIOUG66636-G11|BOLD:ACG0241  
Chloropidae|GMPJA7917-21|BIOUG66637-C08|BOLD:ACG0241  
Chloropidae|GMPJA4197-21|BIOUG65699-B05|BOLD:ACG0241  
Chloropidae|GMPJA7754-21|BIOUG66635-E11|BOLD:ACG0241  
Chloropidae|GMPJA7984-21|BIOUG66638-A04|BOLD:ACG0241  
Chloropidae|GMPJA5067-21|BIOUG66607-C08|BOLD:ACG0241  
Chloropidae|GMPJA10669-21|BIOUG70237-A08|BOLD:ACG0241  
Chloropidae|GMPJA4491-21|BIOUG66602-C02|BOLD:ACG0241  
Chloropidae|GMPJA8671-21|BIOUG66645-C02|BOLD:ACG0241  
Chloropidae|GMPJA8465-21|BIOUG66643-A10|BOLD:ACG0241  
Chloropidae|GMPJA8464-21|BIOUG66643-A09|BOLD:ACG0241  
Chloropidae|GMPJA8209-21|BIOUG66640-D03|BOLD:ACG0241  
Chloropidae|GMPJA7249-21|BIOUG66630-C05|BOLD:ACG0241  
Chloropidae|GMPJA6824-21|BIOUG66625-G07|BOLD:ACG0241  
Chloropidae|GMPJA6593-21|BIOUG66623-D02|BOLD:ACG0241  
Chloropidae|GMPJA5057-21|BIOUG66607-B10|BOLD:ACG0241  
Chloropidae|GMPJA3060-21|BIOUG65687-B08|BOLD:ACG0241  
Chloropidae|GMPJA4581-21|BIOUG66603-B09|BOLD:ACG0241  
Chloropidae|GMPJA8466-21|BIOUG66643-A11|BOLD:ACG0241  
Chloropidae|GMPJA6288-21|BIOUG66620-B06|BOLD:ACG0241  
Chloropidae|GMPJA5144-21|BIOUG66608-B02|BOLD:ACG0241  
Chloropidae|GMPJA4223-21|BIOUG65699-D07|BOLD:ACG0241  
Chloropidae|GMPJA8526-21|BIOUG66643-F11|BOLD:ACG0241  
Chloropidae|GMPJA8169-21|BIOUG66639-H10|BOLD:ACG0241  
Chloropidae|GMPJA10574-21|BIOUG70236-A08|BOLD:ACG0241  
Chloropidae|GMPJA5557-21|BIOUG66612-D11|BOLD:ACG0241  
Chloropidae|GMPJA3271-21|BIOUG65689-D05|BOLD:ACG0241  
Chloropidae|GMPJA4129-21|BIOUG65698-D08|BOLD:ACG0241  
Chloropidae|GMPJA8506-21|BIOUG66643-E03|BOLD:ACG0241  
Chloropidae|GMPJA8172-21|BIOUG66640-A02|BOLD:ACG0241  
Chloropidae|GMPJA5492-21|BIOUG66611-G05|BOLD:ACG0241  
Chloropidae|GMPJA8757-21|BIOUG66646-B05|BOLD:ACG0241  
Chloropidae|GMPJA5191-21|BIOUG66608-F01|BOLD:ACG0241  
Chloropidae|GMPJA7858-21|BIOUG66636-F08|BOLD:ACG0241  
Chloropidae|GMPJA6730-21|BIOUG66624-G08|BOLD:ACG0241  
Chloropidae|GMPJA5043-21|BIOUG66607-A08|BOLD:ACG0241  
Chloropidae|GMPJA4105-21|BIOUG65698-B08|BOLD:ACP4699  
Chloropidae|GMPJA8699-21|BIOUG66645-E06|BOLD:ACP4699  
Chloropidae|GMPJA10322-21|BIOUG70233-D05|BOLD:ACP4699  
Chloropidae|GMPJA158-21|BIOUG65657-B02|BOLD:ACP4699  
Chloropidae|GMPJA5199-21|BIOUG66608-F09|BOLD:ACP4699  
Chloropidae|GMPJA7545-21|BIOUG66633-D04|BOLD:ACP4699  
Chloropidae|GMPJA7240-21|BIOUG66630-B08|BOLD:ACP4699  
Chloropidae|GMPJA4271-21|BIOUG65699-H07|BOLD:ACP4699  
Chloropidae|GMPJA3111-21|BIOUG65687-F11|BOLD:ACP4699  
Chloropidae|GMPJA474-21|BIOUG65660-D09|BOLD:ACP4699  
Chloropidae|GMPJA7758-21|BIOUG66635-F03|BOLD:ACP4699  
Chloropidae|GMPJA052-21|BIOUG65656-A03|BOLD:ACP4699  
Chloropidae|GMPJA8514-21|BIOUG66643-E11|BOLD:ACP4699  
Chloropidae|GMPJA8301-21|BIOUG66641-C12|BOLD:ACP4699  
Chloropidae|GMPJA7747-21|BIOUG66635-E04|BOLD:ACP4699  
Chloropidae|GMPJA8415-21|BIOUG66642-E07|BOLD:ACP4699  
Chloropidae|GMPJA436-21|BIOUG65660-A07|BOLD:ACP4699  
Chloropidae|GMPJA135-21|BIOUG65656-H02|BOLD:ACP4699  
Chloropidae|GMPJA8227-21|BIOUG66640-E09|BOLD:ACP4699  
Chloropidae|GMPJA3671-21|BIOUG65693-F01|BOLD:ACP4699  
Chloropidae|GMPJA8709-21|BIOUG66645-F04|BOLD:ACP4699  
Chloropidae|GMPJA8338-21|BIOUG66641-G01|BOLD:ACP4699  
Chloropidae|GMPJA7388-21|BIOUG66631-G01|BOLD:ACP4699



Chloropidae|GMPJA8109-21|BIOUG66645-F04|BOLD:ACP4699  
 Chloropidae|GMPJA8338-21|BIOUG66641-G01|BOLD:ACP4699  
 Chloropidae|GMPJA7388-21|BIOUG66631-G01|BOLD:ACP4699  
 Chloropidae|GMPJA5173-21|BIOUG66608-D07|BOLD:ACP4699  
 Chloropidae|GMPJA8772-21|BIOUG66646-C08|BOLD:ACP4699  
 Chloropidae|GMPJA10579-21|BIOUG70236-B01|BOLD:ACP4699  
 Chloropidae|GMPJA7517-21|BIOUG66633-A12|BOLD:ACP4699  
 Chloropidae|GMPJA211-21|BIOUG65657-F07|BOLD:ACP4699  
 Chloropidae|GMPJA10663-21|BIOUG70237-A02|BOLD:ACP4699  
 Chloropidae|GMPJA8131-21|BIOUG66639-E08|BOLD:ACP4699  
 Chloropidae|GMPJA10337-21|BIOUG70233-E08|BOLD:ACP4699  
 Chloropidae|GMPJA3204-21|BIOUG65688-F09|BOLD:ACP4699  
 Chloropidae|GMPJA140-21|BIOUG65656-H07|BOLD:ACP4699  
 Chloropidae|GMPJA5559-21|BIOUG66612-E01|BOLD:ACP4699  
 Chloropidae|GMPJA5430-21|BIOUG66611-B03|BOLD:ACP4699  
 Chloropidae|GMPJA2296-21|BIOUG65679-F02|BOLD:ACP4699  
 Chloropidae|GMPJA8157-21|BIOUG66639-G10|BOLD:ACP4699  
 Chloropidae|GMPJA8437-21|BIOUG66642-G05|BOLD:ACP4699  
 Chloropidae|GMPJA10262-21|BIOUG70232-G04|BOLD:ACP4699  
 Chloropidae|GMPJA4153-21|BIOUG65698-F08|BOLD:ACP4699  
 Chloropidae|GMPJA8112-21|BIOUG66639-D01|BOLD:ACP4699  
 Chloropidae|GMPJA7977-21|BIOUG66637-H08|BOLD:ACP4699  
 Chloropidae|GMPJA7267-21|BIOUG66630-D11|BOLD:ACP4699  
 Chloropidae|GMPJA5354-21|BIOUG66610-C10|BOLD:ACP4699  
 Chloropidae|GMPJA8300-21|BIOUG66641-C11|BOLD:ACG0916  
 Chloropidae|GMPJA2137-21|BIOUG65677-H09|BOLD:ACG0916  
 Chloropidae|GMPJA1917-21|BIOUG65675-F03|BOLD:ACG0916  
 Chloropidae|GMPJA1850-21|BIOUG65674-H07|BOLD:ACG0916  
 Chloropidae|GMPJA367-21|BIOUG65659-C09|BOLD:ACG0916  
 Chloropidae|GMPJA2513-21|BIOUG65681-H05|BOLD:ACG0916  
 Chloropidae|GMPJA2217-21|BIOUG65678-G06|BOLD:ACG0916  
 Chloropidae|GMPJA1909-21|BIOUG65675-E07|BOLD:ACG0916  
 Chloropidae|GMPJA221-21|BIOUG65657-G05|BOLD:ACG0916  
 Chloropidae|GMPJA10573-21|BIOUG70236-A07|BOLD:ACG0916  
 Chloropidae|GMPJA5271-21|BIOUG66609-D10|BOLD:ACG0916  
 Chloropidae|GMPJA5252-21|BIOUG66609-C03|BOLD:ACG0916  
 Chloropidae|GMPJA5201-21|BIOUG66608-F11|BOLD:ACG0916  
 Chloropidae|GMPJA053-21|BIOUG65656-A04|BOLD:ACG0916  
 Chloropidae|GMPJA5080-21|BIOUG66607-D09|BOLD:ACG0916  
 Chloropidae|GMPJA5074-21|BIOUG66607-D03|BOLD:ADV1178  
 Chloropidae|GMPJA2019-21|BIOUG65676-F10|BOLD:ADV1178  
 Chloropidae|GMPJA6504-21|BIOUG66622-D08|BOLD:ADV1178  
 Chloropidae|GMPJA3157-21|BIOUG65688-B10|BOLD:ADV1178  
 Chloropidae|GMPJA3205-21|BIOUG65688-F10|BOLD:ADV1178  
 Chloropidae|GMPJA10668-21|BIOUG70237-A07|BOLD:ADV1178  
 Chloropidae|GMPJA4224-21|BIOUG65699-D08|BOLD:ADV1178  
 Chloropidae|GMPJA4458-21|BIOUG66601-H04|BOLD:ADV1178  
 Chloropidae|GMPJA116-21|BIOUG65656-F07|BOLD:ADV1178  
 Chloropidae|GMPJA1493-21|BIOUG65671-B07|BOLD:ADV1178  
 Chloropidae|GMPJA10533-21|BIOUG70235-F02|BOLD:ADV1178  
 Chloropidae|GMPJA5562-21|BIOUG66612-E04|BOLD:ADV1178  
 Chloropidae|GMPJA5280-21|BIOUG66609-E07|BOLD:ADV1178  
 Chloropidae|GMPJA5268-21|BIOUG66609-D07|BOLD:ADV1178  
 Chloropidae|GMPJA5395-21|BIOUG66610-G03|BOLD:ADV1178  
 Chloropidae|GMPJA5348-21|BIOUG66610-C04|BOLD:ADV1178  
 Chloropidae|GMPJA10581-21|BIOUG70236-B03|BOLD:ADV1178  
 Chloropidae|GMPJA7842-21|BIOUG66636-E04|BOLD:ADV1178  
 Chloropidae|GMPJA5337-21|BIOUG66610-B05|BOLD:ADV1178  
 Chloropidae|GMPJA4131-21|BIOUG65698-D10|BOLD:ADV1178  
 Chloropidae|GMPJA7731-21|BIOUG66635-C12|BOLD:ADV1178  
 Chloropidae|GMPJA5061-21|BIOUG66607-C02|BOLD:ADV1178  
 Chloropidae|GMPJA3543-21|BIOUG65692-C04|BOLD:ACR0498  
 Chloropidae|GMPJA3650-21|BIOUG65693-D04|BOLD:ACR0498  
 Chloropidae|GMPJA3182-21|BIOUG65688-D11|BOLD:ACR0498  
 Chloropidae|GMPJA8044-21|BIOUG66638-F04|BOLD:ACR0498  
 Chloropidae|GMPJA6626-21|BIOUG66623-F11|BOLD:ACR0498  
 Oscinella|GMPJA1508-21|BIOUG65671-C10|BOLD:ABW4190  
 Oscinella|GMPJA5149-21|BIOUG66608-B07|BOLD:ABW4190  
 Oscinellinae|GMPJA186-21|BIOUG65657-D06|BOLD:ACQ4694  
 Oscinellinae|GMPJA201-21|BIOUG65657-E09|BOLD:ACQ4694  
 Oscinellinae|GMPJA107-21|BIOUG65656-E10|BOLD:ACQ4694  
 Oscinella|GMPJA4108-21|BIOUG65698-B11|BOLD:AAK6032  
 Oscinella|GMPJA439-21|BIOUG65660-A10|BOLD:AAK6032  
 Oscinella|GMPJA8165-21|BIOUG66639-H06|BOLD:AAK6032  
 Oscinella|GMPJA7806-21|BIOUG66636-B04|BOLD:AAK6032  
 Oscinella|GMPJA5134-21|BIOUG66608-A04|BOLD:AAK6032  
 Oscinella|GMPJA111-21|BIOUG65656-F02|BOLD:AAK6032  
 Oscinella|GMPJA7251-21|BIOUG66630-C07|BOLD:AAK6032  
 Oscinella|GMPJA7563-21|BIOUG66633-E10|BOLD:AAK6032  
 Oscinella|GMPJA175-21|BIOUG65657-C07|BOLD:AAK6032  
 Oscinella|GMPJA10546-21|BIOUG70235-G03|BOLD:AAK6032  
 Oscinella|GMPJA10299-21|BIOUG70233-B06|BOLD:AAK6032  
 Oscinella|GMPJA8538-21|BIOUG66643-G11|BOLD:AAK6032  
 Oscinella|GMPJA115-21|BIOUG65656-F06|BOLD:AAK6032  
 Oscinella|GMPJA178-21|BIOUG65657-C10|BOLD:AAK6032  
 Oscinella|GMPJA159-21|BIOUG65657-B03|BOLD:AAK6032  
 Oscinella|GMPJA6418-21|BIOUG66621-E05|BOLD:AAK6032  
 Oscinella|GMPJA5151-21|BIOUG66608-B09|BOLD:AAK6032  
 Oscinella|GMPJA5150-21|BIOUG66608-B08|BOLD:AAK6032  
 Oscinella|GMPJA6577-21|BIOUG66623-B10|BOLD:AAK6032  
 Oscinella|GMPJA6471-21|BIOUG66622-A11|BOLD:AAK6032  
 Oscinella|GMPJA6785-21|BIOUG66625-D04|BOLD:AAK6032  
 Oscinella|GMPJA6767-21|BIOUG66625-B10|BOLD:AAK6032  
 Oscinella|GMPJA7408-21|BIOUG66631-H09|BOLD:AAK6032  
 Oscinella|GMPJA7381-21|BIOUG66631-F06|BOLD:AAK6032  
 Oscinella|GMPJA6887-21|BIOUG66626-D11|BOLD:AAK6032  
 Oscinella|GMPJA7455-21|BIOUG66632-D09|BOLD:AAK6032  
 Oscinella|GMPJA7259-21|BIOUG66630-D03|BOLD:AAK6032  
 Oscinella|GMPJA7720-21|BIOUG66635-C01|BOLD:AAK6032  
 Oscinella|GMPJA7310-21|BIOUG66630-H06|BOLD:AAK6032  
 Oscinella|GMPJA7309-21|BIOUG66630-H05|BOLD:AAK6032  
 Oscinella|GMPJA7340-21|BIOUG66631-C01|BOLD:AAK6032  
 Oscinella|GMPJA7322-21|BIOUG66631-A07|BOLD:AAK6032

Oscinella|GMPJA7309-21|BIOUG66630-H05|BOLD:AAK6032  
Oscinella|GMPJA7340-21|BIOUG66631-C01|BOLD:AAK6032  
Oscinella|GMPJA7322-21|BIOUG66631-A07|BOLD:AAK6032  
Oscinella|GMPJA7992-21|BIOUG66638-A12|BOLD:AAK6032  
Oscinella|GMPJA7475-21|BIOUG66632-F05|BOLD:AAK6032  
Oscinella|GMPJA8043-21|BIOUG66638-F03|BOLD:AAK6032  
Oscinella|GMPJA8005-21|BIOUG66638-C01|BOLD:AAK6032  
Oscinella|GMPJA8234-21|BIOUG66640-F04|BOLD:AAK6032  
Oscinella|GMPJA8110-21|BIOUG66639-C11|BOLD:AAK6032  
Oscinella|GMPJA7853-21|BIOUG66636-F03|BOLD:AAK6032  
Oscinella|GMPJA7840-21|BIOUG66636-E02|BOLD:AAK6032  
Oscinella|GMPJA7778-21|BIOUG66635-G11|BOLD:AAK6032  
Oscinella|GMPJA7630-21|BIOUG66634-C06|BOLD:AAK6032  
Oscinella|GMPJA7584-21|BIOUG66633-G07|BOLD:AAK6032  
Oscinella|GMPJA8063-21|BIOUG66638-G11|BOLD:AAK6032  
Oscinella|GMPJA7891-21|BIOUG66637-A06|BOLD:AAK6032  
Oscinella|GMPJA7867-21|BIOUG66636-G05|BOLD:AAK6032  
Oscinella|GMPJA8275-21|BIOUG66641-A10|BOLD:AAK6032  
Oscinella|GMPJA8268-21|BIOUG66641-A03|BOLD:AAK6032  
Oscinella|GMPJA8401-21|BIOUG66642-D05|BOLD:AAK6032  
Oscinella|GMPJA8396-21|BIOUG66642-C12|BOLD:AAK6032  
Oscinella|GMPJA8384-21|BIOUG66642-B12|BOLD:AAK6032  
Oscinella|GMPJA8367-21|BIOUG66642-A07|BOLD:AAK6032  
Oscinella|GMPJA8444-21|BIOUG66642-G12|BOLD:AAK6032  
Oscinella|GMPJA8408-21|BIOUG66642-D12|BOLD:AAK6032  
Oscinella|GMPJA8705-21|BIOUG66645-E12|BOLD:AAK6032  
Oscinella|GMPJA8684-21|BIOUG66645-D03|BOLD:AAK6032  
Oscinella|GMPJA8626-21|BIOUG66644-G04|BOLD:AAK6032  
Oscinella|GMPJA8461-21|BIOUG66643-A06|BOLD:AAK6032  
Oscinella|GMPJA8788-21|BIOUG66646-D12|BOLD:AAK6032  
Oscinella|GMPJA8725-21|BIOUG66645-G08|BOLD:AAK6032  
Oscinella|GMPJA10217-21|BIOUG70232-C07|BOLD:AAK6032  
Oscinella|GMPJA10199-21|BIOUG70232-B01|BOLD:AAK6032  
Oscinella|GMPJA10577-21|BIOUG70236-A11|BOLD:AAK6032  
Oscinella|GMPJA10372-21|BIOUG70233-H07|BOLD:AAK6032  
Oscinella|GMPJA10231-21|BIOUG70232-D09|BOLD:AAK6032  
Oscinella|GMPJA8800-21|BIOUG66646-E12|BOLD:AAK6032  
Oscinella|GMPJA10326-21|BIOUG70233-D09|BOLD:AAK6032  
Oscinella|GMPJA10261-21|BIOUG70232-G03|BOLD:AAK6032  
Oscinella|GMPJA10232-21|BIOUG70232-D10|BOLD:AAK6032  
Oscinella|GMPJA10222-21|BIOUG70232-C12|BOLD:AAK6032  
Oscinella|GMPJA054-21|BIOUG65656-A05|BOLD:AAK6032  
Oscinella|GMPJA515-21|BIOUG65660-H02|BOLD:AAK6032  
Oscinella|GMPJA416-21|BIOUG65659-G10|BOLD:AAK6032  
Oscinella|GMPJA4165-21|BIOUG65698-G08|BOLD:AAK6032  
Oscinella|GMPJA5093-21|BIOUG66607-E10|BOLD:AAK6032  
Oscinella|GMPJA5464-21|BIOUG66611-E01|BOLD:AAK6032  
Oscinella|GMPJA071-21|BIOUG65656-B10|BOLD:AAK6032  
Oscinella|GMPJA059-21|BIOUG65656-A10|BOLD:AAK6032  
Oscinella|GMPJA5111-21|BIOUG66607-G04|BOLD:AAK6032  
Oscinella|GMPJA5094-21|BIOUG66607-E11|BOLD:AAK6032  
Oscinella|GMPJA081-21|BIOUG65656-C08|BOLD:AAK6032  
Oscinella|GMPJA074-21|BIOUG65656-C01|BOLD:AAK6032  
Oscinella|GMPJA5293-21|BIOUG66609-F08|BOLD:AAK6032  
Oscinella|GMPJA5197-21|BIOUG66608-F07|BOLD:AAK6032  
Oscinella|GMPJA5590-21|BIOUG66612-G08|BOLD:AAK6032  
Oscinella|GMPJA5472-21|BIOUG66611-E09|BOLD:AAK6032  
Oscinella|GMPJA6703-21|BIOUG66624-E05|BOLD:AAK6032  
Oscinella|GMPJA6581-21|BIOUG66623-C02|BOLD:AAK6032  
Oscinella|GMPJA7836-21|BIOUG66636-D10|BOLD:AAK6032  
Oscinella|GMPJA7830-21|BIOUG66636-D04|BOLD:AAK6032  
Oscinella|GMPJA146-21|BIOUG65657-A02|BOLD:AAK6032  
Oscinella|GMPJA101-21|BIOUG65656-E04|BOLD:AAK6032  
Oscinella|GMPJA148-21|BIOUG65657-A04|BOLD:AAK6032  
Oscinella|GMPJA172-21|BIOUG65657-C04|BOLD:AAK6032  
Oscinella|GMPJA209-21|BIOUG65657-F05|BOLD:AAK6032  
Oscinella|GMPJA218-21|BIOUG65657-G02|BOLD:AAK6032  
Oscinella|GMPJA487-21|BIOUG65660-E10|BOLD:AAK6032  
Oscinella|GMPJA7648-21|BIOUG66634-D12|BOLD:AAK6032  
Oscinella|GMPJA10343-21|BIOUG70233-F02|BOLD:AAK6032  
Oscinella|GMPJA376-21|BIOUG65659-D06|BOLD:AAK6032  
Oscinella|GMPJA106-21|BIOUG65656-E09|BOLD:AAK6032  
Oscinella|GMPJA104-21|BIOUG65656-E07|BOLD:AAK6032  
Diptera|GMPJA090-21|BIOUG65656-D05  
Oscinella|GMPJA087-21|BIOUG65656-D02|BOLD:AAK6032  
Oscinella|GMPJA4070-21|BIOUG65697-G08|BOLD:AAK6032  
Oscinella|GMPJA202-21|BIOUG65657-E10|BOLD:AAK6032  
Oscinella|GMPJA3163-21|BIOUG65688-C04|BOLD:AAK6032  
Oscinella|GMPJA8058-21|BIOUG66638-G06|BOLD:AAK6032  
Oscinella|GMPJA7339-21|BIOUG66631-B12|BOLD:AAK6032  
Oscinella|GMPJA5361-21|BIOUG66610-D05|BOLD:AAK6032  
Oscinella|GMPJA10356-21|BIOUG70233-G03|BOLD:AAK6032  
Oscinella|GMPJA5530-21|BIOUG66612-B08|BOLD:AAK6032  
Oscinella|GMPJA5336-21|BIOUG66610-B04|BOLD:AAK6032  
Oscinella|GMPJA7470-21|BIOUG66632-E12|BOLD:AAK6032  
Oscinella|GMPJA5183-21|BIOUG66608-E05|BOLD:AAK6032  
Oscinella|GMPJA8041-21|BIOUG66638-F01|BOLD:AAK6032  
Oscinella|GMPJA6429-21|BIOUG66621-F04|BOLD:AAK6032  
Oscinella|GMPJA082-21|BIOUG65656-C09|BOLD:AAK6032  
Oscinella|GMPJA5051-21|BIOUG66607-B04|BOLD:AAK6032  
Oscinella|GMPJA3201-21|BIOUG65688-F06|BOLD:AEJ4416  
Oscinella|GMPJA2198-21|BIOUG65678-E11|BOLD:ABZ3963  
Oscinella|GMPJA4294-21|BIOUG65700-B07|BOLD:ABZ3963  
Oscinella|GMPJA214-21|BIOUG65657-F10|BOLD:ABZ3963  
Oscinella|GMPJA167-21|BIOUG65657-B11|BOLD:ABZ3963  
Oscinella|GMPJA10570-21|BIOUG70236-A04|BOLD:ABZ3963  
Oscinella|GMPJA5480-21|BIOUG66611-F05|BOLD:ABZ3963  
Oscinella|GMPJA5105-21|BIOUG66607-F10|BOLD:ABZ3963  
Oscinella|GMPJA196-21|BIOUG65657-E04|BOLD:ABZ3963  
Oscinella|GMPJA1834-21|BIOUG65674-G03|BOLD:ABZ3963  
Oscinella|GMPJA3244-21|BIOUG65689-B02|BOLD:ABZ3963  
Oscinella|GMPJA4277-21|BIOUG65700-A02|BOLD:ABZ3963  
Oscinella|GMPJA1192-21|BIOUG65668-A03|BOLD:ABZ3963

Oscinella|GMPJA3244-21|BIOUG65689-B02|BOLD:ABZ3963  
 Oscinella|GMPJA4277-21|BIOUG65700-A02|BOLD:ABZ3963  
 Oscinella|GMPJA1192-21|BIOUG65668-A03|BOLD:ABZ3963  
 Oscinella|GMPJA1968-21|BIOUG65676-B07|BOLD:ABZ3963  
 Oscinella|GMPJA149-21|BIOUG65657-A05|BOLD:ABZ3963  
 Oscinella|GMPJA3633-21|BIOUG65693-B11|BOLD:ABZ3963  
 Oscinella|GMPJA5311-21|BIOUG66609-H02|BOLD:ABZ3963  
 Oscinella|GMPJA5360-21|BIOUG66610-D04|BOLD:ABZ3963  
 Oscinella|GMPJA3142-21|BIOUG65688-A07|BOLD:ABZ3963  
 Oscinella|GMPJA6849-21|BIOUG66626-A09|BOLD:ABZ3963  
 Oscinella|GMPJA1818-21|BIOUG65674-E11|BOLD:ABZ3963  
 Oscinella|GMPJA1401-21|BIOUG65670-B10|BOLD:ABZ3963  
 Oscinella|GMPJA10293-21|BIOUG70233-A12|BOLD:ABZ3963  
 Oscinella|GMPJA1394-21|BIOUG65670-B03|BOLD:ABZ3963  
 Oscinella|GMPJA4060-21|BIOUG65697-F10|BOLD:ABZ3963  
 Oscinella|GMPJA5385-21|BIOUG66610-F05|BOLD:ABZ3963  
 Oscinella|GMPJA170-21|BIOUG65657-C02|BOLD:ABZ3963  
 Oscinella|GMPJA070-21|BIOUG65656-B09|BOLD:ABZ3963  
 Oscinella|GMPJA098-21|BIOUG65656-E01|BOLD:ABZ3963  
 Oscinella|GMPJA3463-21|BIOUG65691-D07|BOLD:ABZ3963  
 Oscinella|GMPJA4278-21|BIOUG65700-A03|BOLD:ABZ3963  
 Oscinella|GMPJA1659-21|BIOUG65672-H06|BOLD:ABZ3963  
 Oscinella|GMPJA3407-21|BIOUG65690-G10|BOLD:ABZ3963  
 Oscinella|GMPJA10245-21|BIOUG70232-E11|BOLD:ABZ3963  
 Oscinella|GMPJA3025-21|BIOUG65686-G08|BOLD:ABZ3963  
 Oscinella|GMPJA5531-21|BIOUG66612-B09|BOLD:ABZ3963  
 Oscinella|GMPJA10666-21|BIOUG70237-A05|BOLD:ABZ3963  
 Oscinella|GMPJA10329-21|BIOUG70233-D12|BOLD:ABZ3963  
 Oscinella|GMPJA10612-21|BIOUG70236-D10|BOLD:ABZ3963  
 Oscinella|GMPJA4237-21|BIOUG65699-E09|BOLD:ABZ3963  
 Oscinella|GMPJA4311-21|BIOUG65700-C12|BOLD:ABZ3963  
 Oscinella|GMPJA4352-21|BIOUG65700-G05|BOLD:ABZ3963  
 Oscinella|GMPJA4104-21|BIOUG65698-B07|BOLD:ABZ3963  
 Oscinella|GMPJA4148-21|BIOUG65698-F03|BOLD:ABZ3963  
 Oscinella|GMPJA404-21|BIOUG65659-F10|BOLD:ABZ3963  
 Oscinella|GMPJA429-21|BIOUG65659-H11|BOLD:ABZ3963  
 Oscinella|GMPJA469-21|BIOUG65660-D04|BOLD:ABZ3963  
 Oscinella|GMPJA1502-21|BIOUG65671-C04|BOLD:ABZ3963  
 Oscinella|GMPJA1646-21|BIOUG65672-G05|BOLD:ABZ3963  
 Oscinella|GMPJA3093-21|BIOUG65687-E05|BOLD:ABZ3963  
 Oscinella|GMPJA8201-21|BIOUG66640-C07|BOLD:ABZ3963  
 Oscinella|GMPJA4254-21|BIOUG65699-G02|BOLD:ABZ3963  
 Oscinella|GMPJA5316-21|BIOUG66609-H07|BOLD:ABZ3963  
 Oscinella|GMPJA5175-21|BIOUG66608-D09|BOLD:ABZ3963  
 Oscinella|GMPJA5044-21|BIOUG66607-A09|BOLD:ABZ3963  
 Oscinella|GMPJA2150-21|BIOUG65678-A11|BOLD:ABZ3963  
 Oscinella|GMPJA1895-21|BIOUG65675-D05|BOLD:ABZ3963  
 Oscinella|GMPJA091-21|BIOUG65656-D06|BOLD:ABZ3963  
 Oscinella|GMPJA3522-21|BIOUG65692-A07|BOLD:ABZ3963  
 Oscinella|GMPJA1031-21|BIOUG65666-C08|BOLD:ABZ3963  
 Oscinella|GMPJA747-21|BIOUG65663-C09|BOLD:ABZ3963  
 Oscinella|GMPJA5547-21|BIOUG66612-D01|BOLD:ABZ3963  
 Oscinella|GMPJA1595-21|BIOUG65672-C02|BOLD:ABZ3963  
 Oscinella|GMPJA3665-21|BIOUG65693-E07|BOLD:ABZ3963  
 Oscinella|GMPJA4221-21|BIOUG65699-D05|BOLD:ABZ3963  
 Oscinella|GMPJA4472-21|BIOUG66602-A07|BOLD:ABZ3963  
 Oscinella|GMPJA10202-21|BIOUG70232-B04|BOLD:ABZ3963  
 Oscinella|GMPJA7391-21|BIOUG66631-G04|BOLD:ABZ3963  
 Oscinella|GMPJA5508-21|BIOUG66611-H09|BOLD:ABZ3963  
 Oscinella|GMPJA3209-21|BIOUG65688-G02|BOLD:ABZ3963  
 Oscinella|GMPJA3173-21|BIOUG65688-D02|BOLD:ABZ3963  
 Oscinella|GMPJA1961-21|BIOUG65676-A12|BOLD:ABZ3963  
 Oscinella|GMPJA986-21|BIOUG65665-G10|BOLD:ABZ3963  
 Oscinella|GMPJA495-21|BIOUG65660-F06|BOLD:ABZ3963  
 Oscinella|GMPJA3317-21|BIOUG65689-H03|BOLD:ABZ3963  
 Oscinella|GMPJA142-21|BIOUG65656-H09|BOLD:ABZ3963  
 Oscinella|GMPJA5495-21|BIOUG66611-G08|BOLD:ABZ3963  
 Oscinella|GMPJA3520-21|BIOUG65692-A05|BOLD:ABZ3963  
 Oscinella|GMPJA10339-21|BIOUG70233-E10|BOLD:ABZ3963  
 Oscinella|GMPJA10319-21|BIOUG70233-D02|BOLD:ABZ3963  
 Oscinella|GMPJA10559-21|BIOUG70235-H04|BOLD:ABZ3963  
 Oscinella|GMPJA3154-21|BIOUG65688-B07|BOLD:ABZ3963  
 Oscinella|GMPJA10312-21|BIOUG70233-C07|BOLD:ABZ3963  
 Oscinella|GMPJA1315-21|BIOUG65669-C07|BOLD:ABZ3963  
 Oscinella|GMPJA5603-21|BIOUG66612-H09|BOLD:ABZ3963  
 Oscinella|GMPJA5527-21|BIOUG66612-B05|BOLD:ABZ3963  
 Oscinella|GMPJA5455-21|BIOUG66611-D04|BOLD:ABZ3963  
 Oscinella|GMPJA5085-21|BIOUG66607-E02|BOLD:ABZ3963  
 Oscinella|GMPJA5146-21|BIOUG66608-B04|BOLD:ABZ3963  
 Oscinella|GMPJA5462-21|BIOUG66611-D11|BOLD:ABZ3963  
 Oscinella|GMPJA8674-21|BIOUG66645-C05|BOLD:ABZ3963  
 Oscinella|GMPJA7936-21|BIOUG66637-E03|BOLD:ABZ3963  
 Oscinella|GMPJA3353-21|BIOUG65690-C04|BOLD:ABZ3963  
 Oscinella|GMPJA10565-21|BIOUG70235-H10|BOLD:ABZ3963  
 Oscinella|GMPJA5284-21|BIOUG66609-E11|BOLD:ABZ3963  
 Oscinella|GMPJA5269-21|BIOUG66609-D08|BOLD:ABZ3963  
 Oscinella|GMPJA4262-21|BIOUG65699-G10|BOLD:ABZ3963  
 Oscinella|GMPJA3586-21|BIOUG65692-F11|BOLD:ABZ3963  
 Oscinella|GMPJA126-21|BIOUG65656-G05|BOLD:ABZ3963  
 Oscinella|GMPJA4111-21|BIOUG65698-C02|BOLD:ABZ3963  
 Oscinella|GMPJA351-21|BIOUG65659-B05|BOLD:ABZ3963  
 Oscinella|GMPJA1195-21|BIOUG65668-A06|BOLD:ABZ3963  
 Oscinella|GMPJA1908-21|BIOUG65675-E06|BOLD:ABZ3963  
 Oscinella|GMPJA2203-21|BIOUG65678-F04|BOLD:ABZ3963  
 Oscinella|GMPJA2206-21|BIOUG65678-F07|BOLD:ABZ3963  
 Oscinella|GMPJA1686-21|BIOUG65673-B10|BOLD:ABZ3963  
 Oscinella|GMPJA1735-21|BIOUG65673-F11|BOLD:ABZ3963  
 Oscinella|GMPJA967-21|BIOUG65665-F03|BOLD:ABZ3963  
 Oscinella|GMPJA3068-21|BIOUG65687-C04|BOLD:ABZ3963  
 Oscinella|GMPJA5082-21|BIOUG66607-D11|BOLD:ABZ3963  
 Oscinella|GMPJA2763-21|BIOUG65684-E06|BOLD:ABZ3963  
 Oscinella|GMPJA2435-21|BIOUG65681-A11|BOLD:ABZ3963

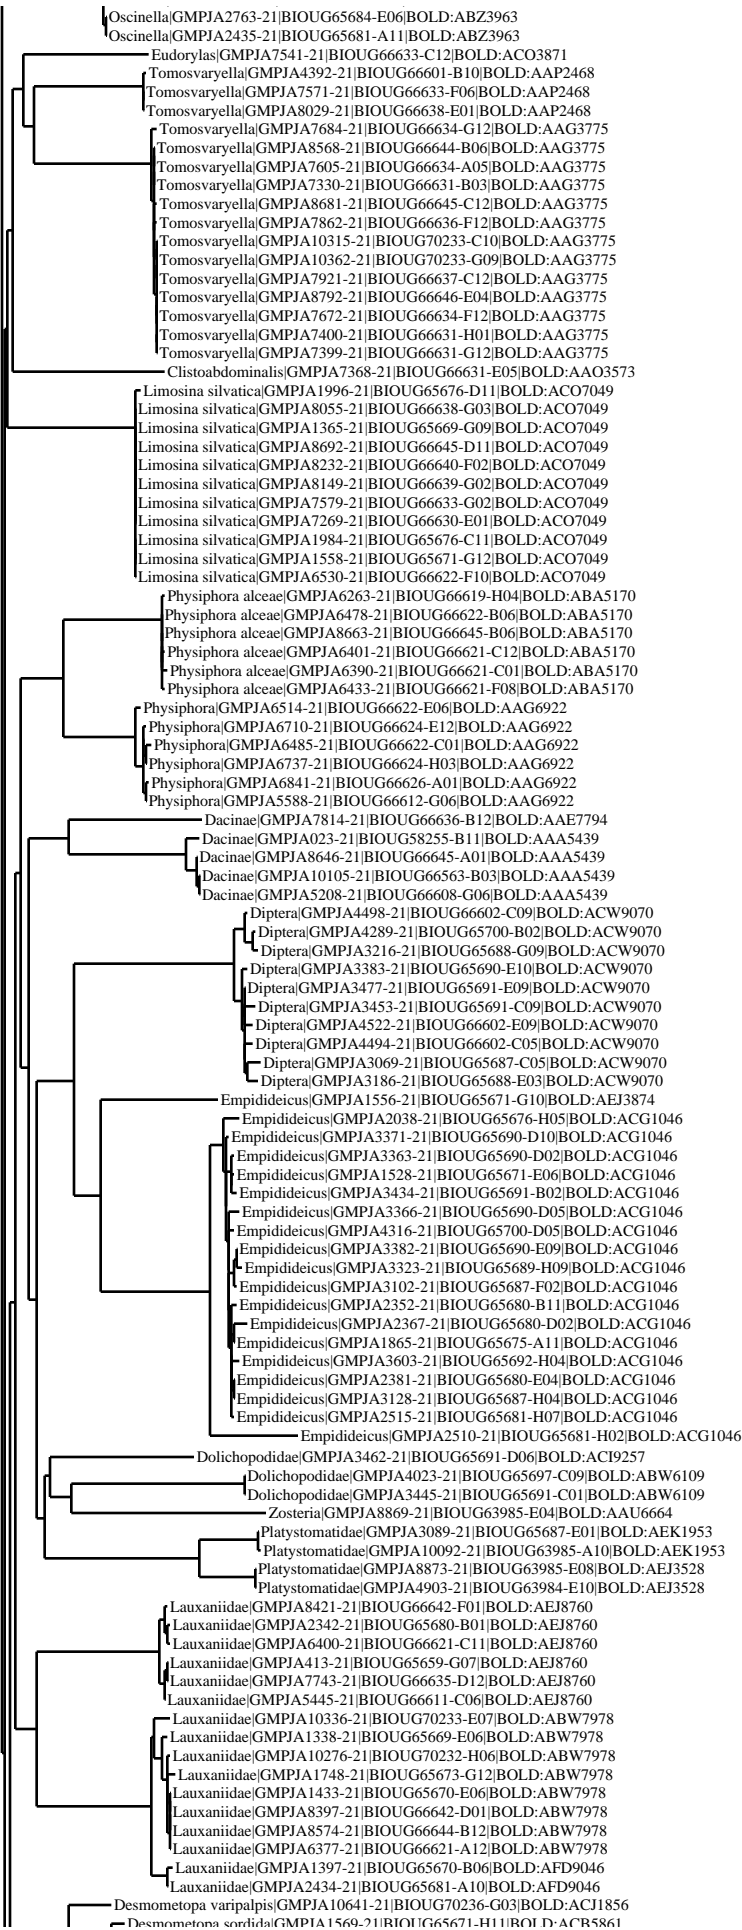

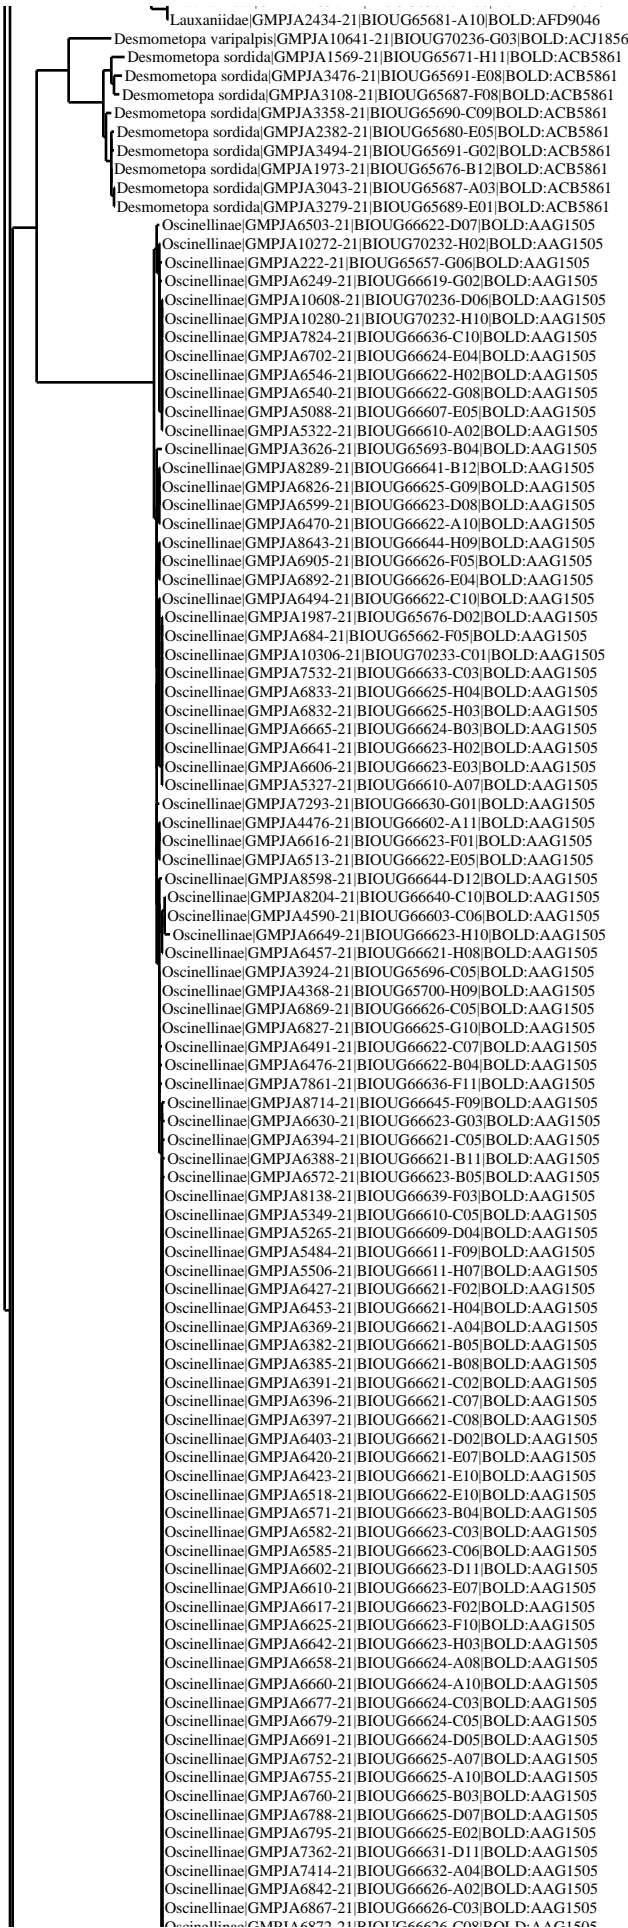

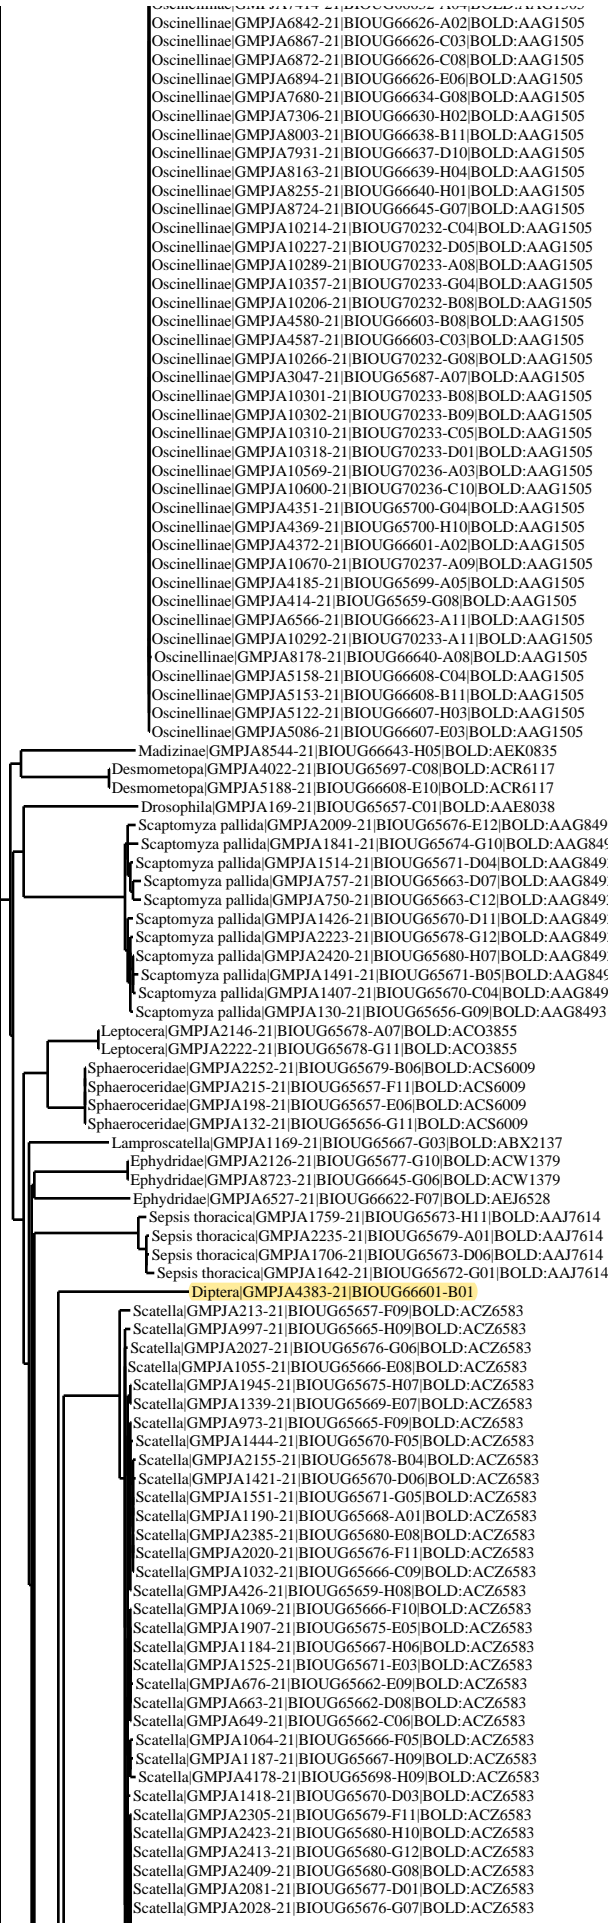

Scatella|GMPJA2081-21|BIOUG65677-D01|BOLD:ACZ6583  
Scatella|GMPJA2028-21|BIOUG65676-G07|BOLD:ACZ6583  
Scatella|GMPJA2283-21|BIOUG65679-E01|BOLD:ACZ6583  
Scatella|GMPJA1179-21|BIOUG65667-H01|BOLD:ACZ6583  
Scatella|GMPJA700-21|BIOUG65662-G09|BOLD:ACZ6583  
Scatella|GMPJA1201-21|BIOUG65668-A12|BOLD:ACZ6583  
Scatella|GMPJA683-21|BIOUG65662-F04|BOLD:ACZ6583  
Scatella|GMPJA062-21|BIOUG65656-B01|BOLD:ACZ6583  
Scatella|GMPJA963-21|BIOUG65665-E11|BOLD:ACZ6583  
Scatella|GMPJA457-21|BIOUG65660-C04|BOLD:ACZ6583  
Scatella|GMPJA1189-21|BIOUG65667-H11|BOLD:ACZ6583  
Scatella|GMPJA713-21|BIOUG65662-H10|BOLD:ACZ6583  
Scatella|GMPJA4361-21|BIOUG65700-H02|BOLD:ACZ6583  
Scatella|GMPJA6375-21|BIOUG66621-A10|BOLD:ACZ6583  
Scatella|GMPJA1962-21|BIOUG65676-B01|BOLD:ACZ6583  
Scatella|GMPJA961-21|BIOUG65665-E09|BOLD:ACZ6583  
Scatella|GMPJA659-21|BIOUG65662-D04|BOLD:ACZ6583  
Scatella|GMPJA1122-21|BIOUG65667-C04|BOLD:ACZ6583  
Scatella|GMPJA1185-21|BIOUG65667-H07|BOLD:ACZ6583  
Scatella|GMPJA1008-21|BIOUG65666-A09|BOLD:ACZ6583  
Scatella|GMPJA1028-21|BIOUG65666-C05|BOLD:ACZ6583  
Scatella|GMPJA992-21|BIOUG65665-H04|BOLD:ACZ6583  
Scatella|GMPJA1132-21|BIOUG65667-D02|BOLD:ACZ6583  
Scatella|GMPJA926-21|BIOUG65665-B10|BOLD:ACZ6583  
Scatella|GMPJA2757-21|BIOUG65684-D12|BOLD:ACZ6583  
Scatella|GMPJA945-21|BIOUG65665-D05|BOLD:ACZ6583  
Scatella|GMPJA965-21|BIOUG65665-F01|BOLD:ACZ6583  
Scatella|GMPJA628-21|BIOUG65662-A09|BOLD:ACZ6583  
Scatella|GMPJA668-21|BIOUG65662-E01|BOLD:ACZ6583  
Scatella|GMPJA670-21|BIOUG65662-E03|BOLD:ACZ6583  
Scatella|GMPJA685-21|BIOUG65662-F06|BOLD:ACZ6583  
Scatella|GMPJA1006-21|BIOUG65666-A07|BOLD:ACZ6583  
Scatella|GMPJA1092-21|BIOUG65666-H09|BOLD:ACZ6583  
Scatella|GMPJA1101-21|BIOUG65667-A07|BOLD:ACZ6583  
Scatella|GMPJA1109-21|BIOUG65667-B03|BOLD:ACZ6583  
Scatella|GMPJA1114-21|BIOUG65667-B08|BOLD:ACZ6583  
Scatella|GMPJA1134-21|BIOUG65667-D04|BOLD:ACZ6583  
Scatella|GMPJA1159-21|BIOUG65667-F05|BOLD:ACZ6583  
Scatella|GMPJA1358-21|BIOUG65669-G02|BOLD:ACZ6583  
Scatella|GMPJA1971-21|BIOUG65676-B10|BOLD:ACZ6583  
Scatella|GMPJA2074-21|BIOUG65677-C06|BOLD:ACZ6583  
Scatella|GMPJA1082-21|BIOUG65666-G11|BOLD:ACZ6583  
Scatella|GMPJA949-21|BIOUG65665-D09|BOLD:ACZ6583  
Scatella|GMPJA994-21|BIOUG65665-H06|BOLD:ACZ6583  
Scatella|GMPJA1015-21|BIOUG65666-B04|BOLD:ACZ6583  
Scatella|GMPJA1013-21|BIOUG65666-B02|BOLD:ACZ6583  
Scatella|GMPJA1007-21|BIOUG65666-A08|BOLD:ACZ6583  
Scatella|GMPJA1005-21|BIOUG65666-A06|BOLD:ACZ6583  
Scatella|GMPJA1004-21|BIOUG65666-A05|BOLD:ACZ6583  
Scatella|GMPJA998-21|BIOUG65665-H10|BOLD:ACZ6583  
Scatella|GMPJA719-21|BIOUG65663-A05|BOLD:ACZ6583  
Scatella|GMPJA712-21|BIOUG65662-H09|BOLD:ACZ6583  
Scatella|GMPJA1093-21|BIOUG65666-H10|BOLD:ACZ6583  
Scatella|GMPJA1091-21|BIOUG65666-H08|BOLD:ACZ6583  
Scatella|GMPJA1086-21|BIOUG65666-H03|BOLD:ACZ6583  
Scatella|GMPJA1081-21|BIOUG65666-G10|BOLD:ACZ6583  
Scatella|GMPJA707-21|BIOUG65662-H04|BOLD:ACZ6583  
Scatella|GMPJA699-21|BIOUG65662-G08|BOLD:ACZ6583  
Scatella|GMPJA1325-21|BIOUG65669-D05|BOLD:ACZ6583  
Scatella|GMPJA1318-21|BIOUG65669-C10|BOLD:ACZ6583  
Scatella|GMPJA654-21|BIOUG65662-C11|BOLD:ACZ6583  
Scatella|GMPJA650-21|BIOUG65662-C07|BOLD:ACZ6583  
Scatella|GMPJA632-21|BIOUG65662-B01|BOLD:ACZ6583  
Scatella|GMPJA620-21|BIOUG65662-A01|BOLD:ACZ6583  
Scatella|GMPJA362-21|BIOUG65659-C04|BOLD:ACZ6583  
Scatella|GMPJA975-21|BIOUG65665-F11|BOLD:ACZ6583  
Scatella|GMPJA1070-21|BIOUG65666-F11|BOLD:ACZ6583  
Scatella|GMPJA1067-21|BIOUG65666-F08|BOLD:ACZ6583  
Scatella|GMPJA1066-21|BIOUG65666-F07|BOLD:ACZ6583  
Scatella|GMPJA1061-21|BIOUG65666-F02|BOLD:ACZ6583  
Scatella|GMPJA1476-21|BIOUG65671-A02|BOLD:ACZ6583  
Scatella|GMPJA1440-21|BIOUG65670-F01|BOLD:ACZ6583  
Scatella|GMPJA974-21|BIOUG65665-F10|BOLD:ACZ6583  
Scatella|GMPJA970-21|BIOUG65665-F06|BOLD:ACZ6583  
Scatella|GMPJA1058-21|BIOUG65666-E11|BOLD:ACZ6583  
Scatella|GMPJA1054-21|BIOUG65666-E07|BOLD:ACZ6583  
Scatella|GMPJA1052-21|BIOUG65666-E05|BOLD:ACZ6583  
Scatella|GMPJA1046-21|BIOUG65666-D11|BOLD:ACZ6583  
Scatella|GMPJA969-21|BIOUG65665-F05|BOLD:ACZ6583  
Scatella|GMPJA959-21|BIOUG65665-E07|BOLD:ACZ6583  
Scatella|GMPJA955-21|BIOUG65665-E03|BOLD:ACZ6583  
Scatella|GMPJA944-21|BIOUG65665-D04|BOLD:ACZ6583  
Scatella|GMPJA943-21|BIOUG65665-D03|BOLD:ACZ6583  
Scatella|GMPJA935-21|BIOUG65665-C07|BOLD:ACZ6583  
Scatella|GMPJA933-21|BIOUG65665-C05|BOLD:ACZ6583  
Scatella|GMPJA927-21|BIOUG65665-B11|BOLD:ACZ6583  
Scatella|GMPJA925-21|BIOUG65665-B09|BOLD:ACZ6583  
Scatella|GMPJA914-21|BIOUG65665-A10|BOLD:ACZ6583  
Scatella|GMPJA1144-21|BIOUG65667-E02|BOLD:ACZ6583  
Scatella|GMPJA1142-21|BIOUG65667-D12|BOLD:ACZ6583  
Scatella|GMPJA1039-21|BIOUG65666-D04|BOLD:ACZ6583  
Scatella|GMPJA1034-21|BIOUG65666-C11|BOLD:ACZ6583  
Scatella|GMPJA060-21|BIOUG65656-A11|BOLD:ACZ6583  
Scatella|GMPJA499-21|BIOUG65660-F10|BOLD:ACZ6583  
Scatella|GMPJA1133-21|BIOUG65667-D03|BOLD:ACZ6583  
Scatella|GMPJA1128-21|BIOUG65667-C10|BOLD:ACZ6583  
Scatella|GMPJA1025-21|BIOUG65666-C02|BOLD:ACZ6583  
Scatella|GMPJA1018-21|BIOUG65666-B07|BOLD:ACZ6583  
Scatella|GMPJA137-21|BIOUG65656-H04|BOLD:ACZ6583  
Scatella|GMPJA4243-21|BIOUG65699-F03|BOLD:ACZ6583  
Scatella|GMPJA3451-21|BIOUG65691-C07|BOLD:ACZ6583  
Scatella|GMPJA10195-21|BIOUG70232-A09|BOLD:ACZ6583

Scatella(GMPJA424-21|BIOUG65699-F03|BOLD:ACZ6583  
 Scatella(GMPJA3451-21|BIOUG65691-C07|BOLD:ACZ6583  
 Scatella(GMPJA10195-21|BIOUG70232-A09|BOLD:ACZ6583  
 Scatella(GMPJA8639-21|BIOUG66644-H05|BOLD:ACZ6583  
 Scatella(GMPJA8313-21|BIOUG66641-D12|BOLD:ACZ6583  
 Scatella(GMPJA1147-21|BIOUG65667-E05|BOLD:ACZ6583  
 Scatella(GMPJA1146-21|BIOUG65667-E04|BOLD:ACZ6583  
 Scatella(GMPJA1438-21|BIOUG65670-E11|BOLD:ACZ6583  
 Scatella(GMPJA1873-21|BIOUG65675-B07|BOLD:ACZ6583  
 Scatella(GMPJA1585-21|BIOUG65672-B04|BOLD:ACZ6583  
 Scatella(GMPJA1583-21|BIOUG65672-B02|BOLD:ACZ6583  
 Scatella(GMPJA1544-21|BIOUG65671-F10|BOLD:ACZ6583  
 Scatella(GMPJA1541-21|BIOUG65671-F07|BOLD:ACZ6583  
 Scatella(GMPJA1538-21|BIOUG65671-F04|BOLD:ACZ6583  
 Scatella(GMPJA1535-21|BIOUG65671-F01|BOLD:ACZ6583  
 Scatella(GMPJA1872-21|BIOUG65675-B06|BOLD:ACZ6583  
 Scatella(GMPJA1870-21|BIOUG65675-B04|BOLD:ACZ6583  
 Scatella(GMPJA1828-21|BIOUG65674-F09|BOLD:ACZ6583  
 Scatella(GMPJA1813-21|BIOUG65674-E06|BOLD:ACZ6583  
 Scatella(GMPJA1802-21|BIOUG65674-D07|BOLD:ACZ6583  
 Scatella(GMPJA1373-21|BIOUG65669-H05|BOLD:ACZ6583  
 Scatella(GMPJA1193-21|BIOUG65668-A04|BOLD:ACZ6583  
 Scatella(GMPJA1191-21|BIOUG65668-A02|BOLD:ACZ6583  
 Scatella(GMPJA1186-21|BIOUG65667-H08|BOLD:ACZ6583  
 Scatella(GMPJA1182-21|BIOUG65667-H04|BOLD:ACZ6583  
 Scatella(GMPJA1180-21|BIOUG65667-H02|BOLD:ACZ6583  
 Scatella(GMPJA1178-21|BIOUG65667-G12|BOLD:ACZ6583  
 Scatella(GMPJA1175-21|BIOUG65667-G09|BOLD:ACZ6583  
 Scatella(GMPJA1164-21|BIOUG65667-F10|BOLD:ACZ6583  
 Scatella(GMPJA1161-21|BIOUG65667-F07|BOLD:ACZ6583  
 Scatella(GMPJA1151-21|BIOUG65667-E09|BOLD:ACZ6583  
 Scatella(GMPJA1127-21|BIOUG65667-C09|BOLD:ACZ6583  
 Scatella(GMPJA1123-21|BIOUG65667-C05|BOLD:ACZ6583  
 Scatella(GMPJA1110-21|BIOUG65667-B04|BOLD:ACZ6583  
 Scatella(GMPJA1108-21|BIOUG65667-B02|BOLD:ACZ6583  
 Scatella(GMPJA1097-21|BIOUG65667-A03|BOLD:ACZ6583  
 Scatella(GMPJA1096-21|BIOUG65667-A02|BOLD:ACZ6583  
 Scatella(GMPJA710-21|BIOUG65662-H07|BOLD:ACZ6583  
 Scatella(GMPJA709-21|BIOUG65662-H06|BOLD:ACZ6583  
 Scatella(GMPJA2186-21|BIOUG65678-D11|BOLD:ACZ6583  
 Scatella(GMPJA1611-21|BIOUG65672-D06|BOLD:ACZ6583  
 Scatella(GMPJA1295-21|BIOUG65669-A11|BOLD:ACZ6583  
 Scatella(GMPJA669-21|BIOUG65662-E02|BOLD:ACZ6583  
 Scatella(GMPJA734-21|BIOUG65663-B08|BOLD:ACZ6583  
 Scatella(GMPJA731-21|BIOUG65663-B05|BOLD:ACZ6583  
 Scatella(GMPJA984-21|BIOUG65665-G08|BOLD:ACZ6583  
 Scatella(GMPJA746-21|BIOUG65663-C08|BOLD:ACZ6583  
 Scatella(GMPJA996-21|BIOUG65665-H08|BOLD:ACZ6583  
 Scatella(GMPJA995-21|BIOUG65665-H07|BOLD:ACZ6583  
 Scatella(GMPJA2248-21|BIOUG65679-B02|BOLD:ACZ6583  
 Scatella(GMPJA2193-21|BIOUG65678-E06|BOLD:ACZ6583  
 Scatella(GMPJA2277-21|BIOUG65679-D07|BOLD:ACZ6583  
 Scatella(GMPJA2259-21|BIOUG65679-C01|BOLD:ACZ6583  
 Scatella(GMPJA1113-21|BIOUG65667-B07|BOLD:ACZ6583  
 Scatella(GMPJA1722-21|BIOUG65673-E10|BOLD:ACZ6583  
 Scatella(GMPJA1734-21|BIOUG65673-F10|BOLD:ACZ6583  
 Scatella(GMPJA1749-21|BIOUG65673-H01|BOLD:ACZ6583  
 Scatella(GMPJA1778-21|BIOUG65674-B07|BOLD:ACZ6583  
 Scatella(GMPJA1953-21|BIOUG65676-A04|BOLD:ACZ6583  
 Scatella(GMPJA1990-21|BIOUG65676-D05|BOLD:ACZ6583  
 Scatella(GMPJA2069-21|BIOUG65677-C01|BOLD:ACZ6583  
 Scatella(GMPJA1105-21|BIOUG65667-A11|BOLD:ACZ6583  
 Scatella(GMPJA1976-21|BIOUG65676-C03|BOLD:ACZ6583  
 Scatella(GMPJA2017-21|BIOUG65676-F08|BOLD:ACZ6583  
 Scatella(GMPJA1507-21|BIOUG65671-C09|BOLD:ACZ6583  
 Scatella(GMPJA2365-21|BIOUG65680-C12|BOLD:ACZ6583  
 Scatella(GMPJA1026-21|BIOUG65666-C03|BOLD:ACZ6583  
 Scatella(GMPJA1062-21|BIOUG65666-F03|BOLD:ACZ6583  
 Scatella(GMPJA1553-21|BIOUG65671-G07|BOLD:ACZ6583  
 Scatella(GMPJA1173-21|BIOUG65667-G07|BOLD:ACZ6583  
 Ephydrinae(GMPJA4187-21|BIOUG65699-A07|BOLD:ACZ6583  
 Scatella(GMPJA2472-21|BIOUG65681-D12|BOLD:ACZ6583  
 Scatella(GMPJA1634-21|BIOUG65672-F05|BOLD:ACZ6583  
 Scatella(GMPJA912-21|BIOUG65665-A08|BOLD:ACZ6583  
 Scatella(GMPJA735-21|BIOUG65663-B09|BOLD:ACZ6583  
 Scatella(GMPJA526-21|BIOUG65661-A02|BOLD:ACZ6583  
 Scatella(GMPJA938-21|BIOUG65665-C10|BOLD:ACZ6583  
 Scatella(GMPJA1079-21|BIOUG65666-G08|BOLD:ACZ6583  
 Scatella(GMPJA1116-21|BIOUG65667-B10|BOLD:ACZ6583  
 Scatella(GMPJA1149-21|BIOUG65667-E07|BOLD:ACZ6583  
 Scatella(GMPJA1509-21|BIOUG65671-C11|BOLD:ACZ6583  
 Scatella(GMPJA1682-21|BIOUG65673-B06|BOLD:ACZ6583  
 Scatella(GMPJA665-21|BIOUG65662-D10|BOLD:ACZ6583  
 Scatella(GMPJA726-21|BIOUG65663-A12|BOLD:ACZ6583  
 Scatella(GMPJA765-21|BIOUG65663-E03|BOLD:ACZ6583  
 Scatella(GMPJA1020-21|BIOUG65666-B09|BOLD:ACZ6583  
 Scatella(GMPJA1022-21|BIOUG65666-B11|BOLD:ACZ6583  
 Scatella(GMPJA1170-21|BIOUG65667-G04|BOLD:ACZ6583  
 Scatella(GMPJA1934-21|BIOUG65675-G08|BOLD:ACZ6583  
 Scatella(GMPJA2166-21|BIOUG65678-C03|BOLD:ACZ6583  
 Scatella(GMPJA911-21|BIOUG65665-A07|BOLD:ACZ6583  
 Scatella(GMPJA968-21|BIOUG65665-F04|BOLD:ACZ6583  
 Scatella(GMPJA1021-21|BIOUG65666-B10|BOLD:ACZ6583  
 Scatella(GMPJA971-21|BIOUG65665-F07|BOLD:ACZ6583  
 Scatella(GMPJA2767-21|BIOUG65684-E10|BOLD:ACZ6583  
 Scatella(GMPJA653-21|BIOUG65662-C10|BOLD:ACZ6583  
 Scatella(GMPJA1087-21|BIOUG65666-H04|BOLD:ACZ6583  
 Scatella(GMPJA1158-21|BIOUG65667-F04|BOLD:ACZ6583  
 Scatella(GMPJA1654-21|BIOUG65672-H01|BOLD:ACZ6583  
 Scatella(GMPJA1714-21|BIOUG65673-E02|BOLD:ACZ6583  
 Scatella(GMPJA1975-21|BIOUG65676-C02|BOLD:ACZ6583  
 Scatella(GMPJA1991-21|BIOUG65676-D06|BOLD:ACZ6583  
 Scatella(GMPJA2051-21|BIOUG65677-A07|BOLD:ACZ6583



Scatella|GMPJA1973-21|BIOUG65670-C02|BOLD:ACZ6583  
 Scatella|GMPJA1991-21|BIOUG65676-D06|BOLD:ACZ6583  
 Scatella|GMPJA2051-21|BIOUG65677-A07|BOLD:ACZ6583  
 Scatella|GMPJA2115-21|BIOUG65677-F11|BOLD:ACZ6583  
 Scatella|GMPJA2118-21|BIOUG65677-G02|BOLD:ACZ6583  
 Scatella|GMPJA2123-21|BIOUG65677-G07|BOLD:ACZ6583  
 Scatella|GMPJA4489-21|BIOUG66602-B12|BOLD:ACZ6583  
 Scatella|GMPJA2158-21|BIOUG65678-B07|BOLD:ACZ6583  
 Scatella|GMPJA2372-21|BIOUG65680-D07|BOLD:ACZ6583  
 Scatella|GMPJA2397-21|BIOUG65680-F08|BOLD:ACZ6583  
 Scatella|GMPJA1183-21|BIOUG65667-H05|BOLD:ACZ6583  
 Scatella|GMPJA643-21|BIOUG65662-B12|BOLD:ACZ6583  
 Scatella|GMPJA937-21|BIOUG65665-C09|BOLD:ACZ6583  
 Scatella|GMPJA2185-21|BIOUG65678-D10|BOLD:ACZ6583  
 Scatella|GMPJA2164-21|BIOUG65678-C01|BOLD:ACZ6583  
 Scatella|GMPJA3106-21|BIOUG65687-F06|BOLD:ACZ6583  
 Scatella|GMPJA8697-21|BIOUG66645-E04|BOLD:ACZ6583  
 Scatella|GMPJA2486-21|BIOUG65681-F02|BOLD:ACZ6583  
 Scatella|GMPJA442-21|BIOUG65660-B01|BOLD:ACZ6583  
 Scatella|GMPJA134-21|BIOUG65656-H01|BOLD:ACZ6583  
 Scatella|GMPJA165-21|BIOUG65657-B09|BOLD:ACZ6583  
 Scatella|GMPJA078-21|BIOUG65656-C05|BOLD:ACZ6583  
 Scatella|GMPJA906-21|BIOUG65665-A02|BOLD:ACZ6583  
 Scatella|GMPJA189-21|BIOUG65657-D09|BOLD:ACZ6583  
 Scatella|GMPJA956-21|BIOUG65665-E04|BOLD:ACZ6583  
 Scatella|GMPJA950-21|BIOUG65665-D10|BOLD:ACZ6583  
 Scatella|GMPJA939-21|BIOUG65665-C11|BOLD:ACZ6583  
 Scatella|GMPJA936-21|BIOUG65665-C08|BOLD:ACZ6583  
 Scatella|GMPJA929-21|BIOUG65665-C01|BOLD:ACZ6583  
 Scatella|GMPJA924-21|BIOUG65665-B08|BOLD:ACZ6583  
 Scatella|GMPJA923-21|BIOUG65665-B07|BOLD:ACZ6583  
 Scatella|GMPJA908-21|BIOUG65665-A04|BOLD:ACZ6583  
 Scatella|GMPJA982-21|BIOUG65665-G06|BOLD:ACZ6583  
 Scatella|GMPJA980-21|BIOUG65665-G04|BOLD:ACZ6583  
 Scatella|GMPJA630-21|BIOUG65662-A11|BOLD:ACZ6583  
 Scatella|GMPJA358-21|BIOUG65659-B12|BOLD:ACZ6583  
 Scatella|GMPJA637-21|BIOUG65662-B06|BOLD:ACZ6583  
 Scatella|GMPJA635-21|BIOUG65662-B04|BOLD:ACZ6583  
 Scatella|GMPJA671-21|BIOUG65662-E04|BOLD:ACZ6583  
 Scatella|GMPJA661-21|BIOUG65662-D06|BOLD:ACZ6583  
 Scatella|GMPJA703-21|BIOUG65662-G12|BOLD:ACZ6583  
 Scatella|GMPJA674-21|BIOUG65662-E07|BOLD:ACZ6583  
 Scatella|GMPJA1137-21|BIOUG65667-D07|BOLD:ACZ6583  
 Scatella|GMPJA1126-21|BIOUG65667-C08|BOLD:ACZ6583  
 Scatella|GMPJA720-21|BIOUG65663-A06|BOLD:ACZ6583  
 Scatella|GMPJA704-21|BIOUG65662-H01|BOLD:ACZ6583  
 Scatella|GMPJA1000-21|BIOUG65666-A01|BOLD:ACZ6583  
 Scatella|GMPJA991-21|BIOUG65665-H03|BOLD:ACZ6583  
 Scatella|GMPJA1042-21|BIOUG65666-D07|BOLD:ACZ6583  
 Scatella|GMPJA1016-21|BIOUG65666-B05|BOLD:ACZ6583  
 Scatella|GMPJA1057-21|BIOUG65666-E10|BOLD:ACZ6583  
 Scatella|GMPJA1049-21|BIOUG65666-E02|BOLD:ACZ6583  
 Scatella|GMPJA1085-21|BIOUG65666-H02|BOLD:ACZ6583  
 Scatella|GMPJA1075-21|BIOUG65666-G04|BOLD:ACZ6583  
 Scatella|GMPJA1411-21|BIOUG65670-C08|BOLD:ACZ6583  
 Scatella|GMPJA1196-21|BIOUG65668-A07|BOLD:ACZ6583  
 Scatella|GMPJA1100-21|BIOUG65667-A06|BOLD:ACZ6583  
 Scatella|GMPJA1098-21|BIOUG65667-A04|BOLD:ACZ6583  
 Scatella|GMPJA1165-21|BIOUG65667-F11|BOLD:ACZ6583  
 Scatella|GMPJA1143-21|BIOUG65667-E01|BOLD:ACZ6583  
 Scatella|GMPJA1181-21|BIOUG65667-H03|BOLD:ACZ6583  
 Scatella|GMPJA1176-21|BIOUG65667-G10|BOLD:ACZ6583  
 Scatella|GMPJA1574-21|BIOUG65672-A05|BOLD:ACZ6583  
 Scatella|GMPJA1536-21|BIOUG65671-F02|BOLD:ACZ6583  
 Scatella|GMPJA1920-21|BIOUG65675-F06|BOLD:ACZ6583  
 Scatella|GMPJA1820-21|BIOUG65674-F01|BOLD:ACZ6583  
 Scatella|GMPJA2180-21|BIOUG65678-D05|BOLD:ACZ6583  
 Scatella|GMPJA1591-21|BIOUG65672-B10|BOLD:ACZ6583  
 Scatella|GMPJA2469-21|BIOUG65681-D09|BOLD:ACZ6583  
 Scatella|GMPJA529-21|BIOUG65661-A05|BOLD:ABW7890  
 Scatella|GMPJA10549-21|BIOUG70235-G06|BOLD:ABW7890  
 Scatella|GMPJA497-21|BIOUG65660-F08|BOLD:ABW7890  
 Scatella|GMPJA352-21|BIOUG65659-B06|BOLD:ABW7890  
 Scatella|GMPJA5537-21|BIOUG66612-C03|BOLD:ABW7890  
 Scatella|GMPJA1194-21|BIOUG65668-A05|BOLD:ABW7890  
 Scatella|GMPJA1948-21|BIOUG65675-H10|BOLD:ABW7890  
 Scatella|GMPJA1773-21|BIOUG65674-B02|BOLD:ABW7890  
 Scatella|GMPJA2275-21|BIOUG65679-D05|BOLD:ABW7890  
 Scatella|GMPJA391-21|BIOUG65659-E09|BOLD:ABW7890  
 Scatella|GMPJA364-21|BIOUG65659-C06|BOLD:ABW7890  
 Scatella|GMPJA960-21|BIOUG65665-E08|BOLD:ABW7890  
 Scatella|GMPJA152-21|BIOUG65657-A08|BOLD:ABW7890  
 Scatella|GMPJA10234-21|BIOUG70232-D12|BOLD:ABW7890  
 Scatella|GMPJA2442-21|BIOUG65681-B06|BOLD:ABW7890  
 Sphaeroceridae|GMPJA7337-21|BIOUG66631-B10|BOLD:ADH0761  
 Sphaeroceridae|GMPJA8252-21|BIOUG66640-G10|BOLD:ADH0761  
 Sphaeroceridae|GMPJA7282-21|BIOUG66630-F02|BOLD:ADH0761  
 Milichiella lacteipennis|GMPJA10196-21|BIOUG70232-A10|BOLD:AAG7056  
 Milichiella lacteipennis|GMPJA6601-21|BIOUG66623-D10|BOLD:AAG7056  
 Trachypella leucoptera|GMPJA7263-21|BIOUG66630-D07|BOLD:AC08232  
 Sphaeroceridae|GMPJA1336-21|BIOUG65669-E04|BOLD:ACV3269  
 Sphaeroceridae|GMPJA2214-21|BIOUG65678-G03|BOLD:ACV3269  
 Sphaeroceridae|GMPJA2310-21|BIOUG65679-G04|BOLD:ACV3269  
 Sphaeroceridae|GMPJA8179-21|BIOUG66640-A09|BOLD:ACV3269  
 Sphaeroceridae|GMPJA1578-21|BIOUG65672-A09|BOLD:ACV3269  
 Sphaeroceridae|GMPJA2374-21|BIOUG65680-D09|BOLD:ACV3269  
 Sphaeroceridae|GMPJA1702-21|BIOUG65673-D02|BOLD:ACV3269  
 Sphaeroceridae|GMPJA1879-21|BIOUG65675-C01|BOLD:ACV3269  
 Sphaeroceridae|GMPJA8430-21|BIOUG66642-F10|BOLD:ACV3269  
 Sphaeroceridae|GMPJA1459-21|BIOUG65670-G08|BOLD:ACV3269  
 Sphaeroceridae|GMPJA2192-21|BIOUG65678-E05|BOLD:ACV3269  
 Sphaeroceridae|GMPJA1519-21|BIOUG65671-D09|BOLD:ACV3269  
 Sphaeroceridae|GMPJA1799-21|BIOUG65674-D04|BOLD:ACV3269

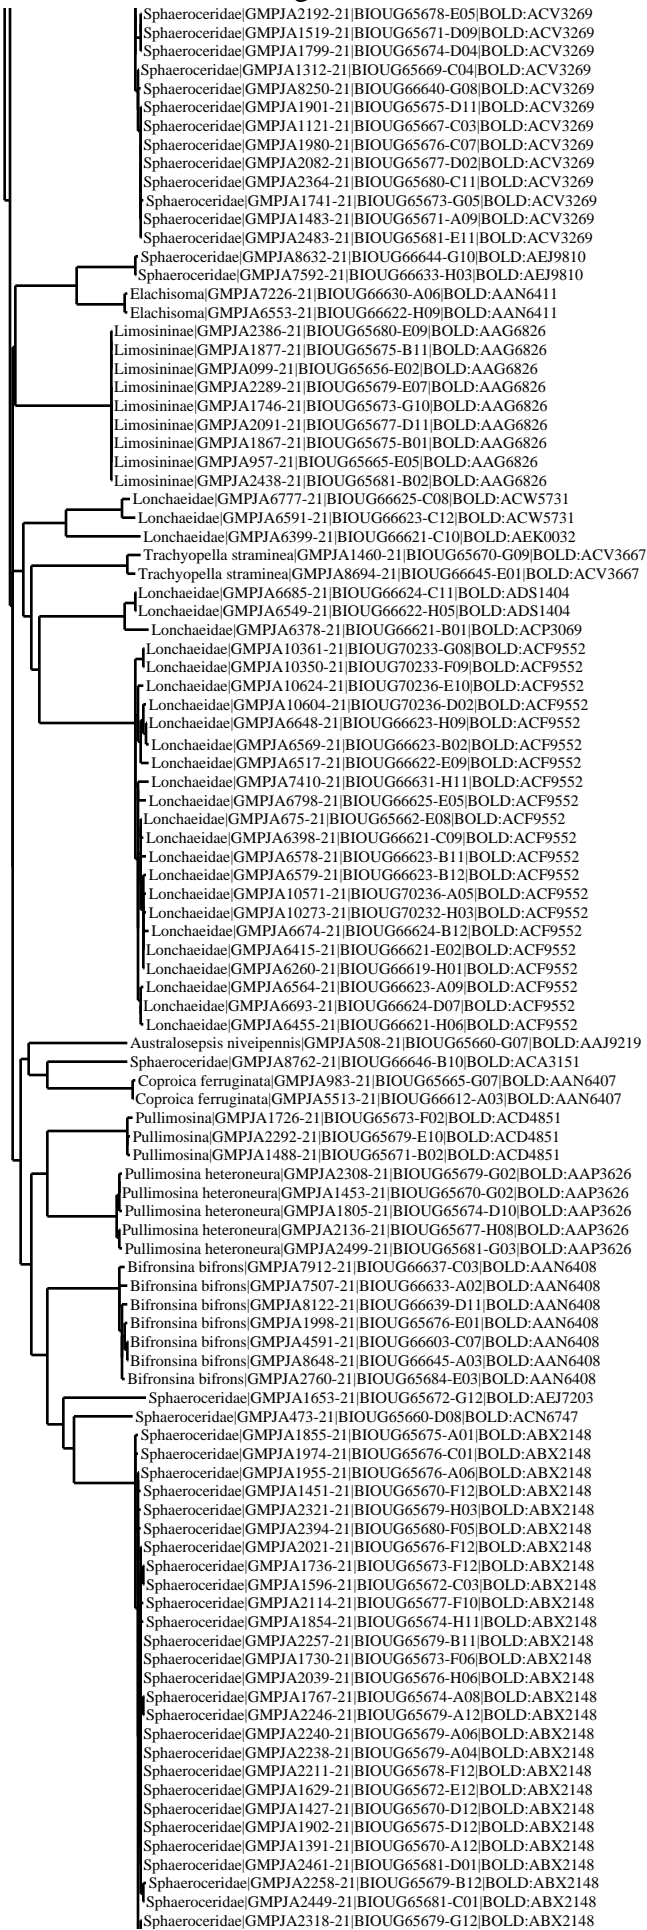

Sphaeroceridae|GMPJA2258-21|BIOUG65679-B12|BOLD:ABX2148  
 Sphaeroceridae|GMPJA2449-21|BIOUG65681-C01|BOLD:ABX2148  
 Sphaeroceridae|GMPJA2318-21|BIOUG65679-G12|BOLD:ABX2148  
 Sphaeroceridae|GMPJA2176-21|BIOUG65678-D01|BOLD:ABX2148  
 Sphaeroceridae|GMPJA1777-21|BIOUG65674-B06|BOLD:ABX2148  
 Sphaeroceridae|GMPJA2424-21|BIOUG65680-H11|BOLD:ABX2148  
 Oxytelinae|GMPJA2730-21|BIOUG65684-B09|BOLD:ACP1327  
 Hypocyphtini|GMPJA769-21|BIOUG65663-E07|BOLD:ABZ8959  
 Hypocyphtini|GMPJA9188-21|BIOUG66650-B11|BOLD:ABZ8959  
 Aleocharinae|GMPJA9175-21|BIOUG66650-A10|BOLD:ACX2648  
 Cybocephalidae|GMPJA3012-21|BIOUG65686-F07|BOLD:ADS9905  
 Hesperinae|GMPJA8851-21|BIOUG63985-C10|BOLD:AAF7377  
 Hesperinae|GMPJA4906-21|BIOUG63984-F01|BOLD:AAD6584  
 Lepidoptera|GMPJA1284-21|BIOUG65668-H11|BOLD:ABV2035  
 Lepidoptera|GMPJA10764-21|BIOUG70238-A08|BOLD:ABV2035  
 Bucculatrix spinachristi|GMPJA3826-21|BIOUG65695-C02|BOLD:ACK9915  
 Phyllocnistis citrella|GMPJA7169-21|BIOUG66629-D08|BOLD:AAP5978  
 Phyllocnistis citrella|GMPJA8393-21|BIOUG66642-C09|BOLD:AAP5978  
 Phyllocnistis citrella|GMPJA4978-21|BIOUG66606-D02|BOLD:AAP5978  
 Xanthorhoe|GMPJA4850-21|BIOUG63984-A05|BOLD:AAG6123  
 Tischeria ptarmica|GMPJA3829-21|BIOUG65695-C05|BOLD:AAI0597  
 Tischeriidae|GMPJA3820-21|BIOUG65695-B08|BOLD:AEJ5416  
 Tischeriidae|GMPJA3819-21|BIOUG65695-B07|BOLD:AEJ5416  
 Tischeriidae|GMPJA7128-21|BIOUG66629-A03|BOLD:AEJ5416  
 Zizeeria|GMPJA10087-21|BIOUG63985-A05|BOLD:ACE9318  
 Zizeeria|GMPJA4915-21|BIOUG63984-F10|BOLD:ACE9318  
 Zizeeria|GMPJA4880-21|BIOUG63984-C11|BOLD:ACE9318  
 Polyommatae|GMPJA4913-21|BIOUG63984-F08|BOLD:AAA3849  
 Polyommatae|GMPJA2945-21|BIOUG58255-H11|BOLD:AAA3849  
 Polyommatae|GMPJA2944-21|BIOUG58255-H10|BOLD:AAA3849  
 Polyommatae|GMPJA2943-21|BIOUG58255-H09|BOLD:AAA3849  
 Polyommatae|GMPJA4914-21|BIOUG63984-F09|BOLD:AAA3849  
 Polyommatae|GMPJA4912-21|BIOUG63984-F07|BOLD:AAA3849  
 Polyommatae|GMPJA4911-21|BIOUG63984-F06|BOLD:AAA3849  
 Polyommatae|GMPJA4910-21|BIOUG63984-F05|BOLD:AAA3849  
 Polyommatae|GMPJA4877-21|BIOUG63984-C08|BOLD:AAA3849  
 Polyommatae|GMPJA4881-21|BIOUG63984-C12|BOLD:AAA3849  
 Polyommatae|GMPJA4879-21|BIOUG63984-C10|BOLD:AAA3849  
 Polyommatae|GMPJA4876-21|BIOUG63984-C07|BOLD:AAA3849  
 Bactra venosana|GMPJA7129-21|BIOUG66629-A04|BOLD:ABZ1079  
 Bactra venosana|GMPJA7148-21|BIOUG66629-B11|BOLD:ABZ1079  
 Bactra venosana|GMPJA7133-21|BIOUG66629-A08|BOLD:ABZ1079  
 Bactra venosana|GMPJA7142-21|BIOUG66629-B05|BOLD:ABZ1079  
 Bactra venosana|GMPJA7145-21|BIOUG66629-B08|BOLD:ABZ1079  
 Bactra venosana|GMPJA7150-21|BIOUG66629-C01|BOLD:ABZ1079  
 Bactra venosana|GMPJA7141-21|BIOUG66629-B04|BOLD:ABZ1079  
 Bactra venosana|GMPJA6293-21|BIOUG66620-B11|BOLD:ABZ1079  
 Lepidoptera|GMPJA4977-21|BIOUG66606-D01|BOLD:AEJ4222  
 Neoblastobasis eurtella|GMPJA7144-21|BIOUG66629-B07|BOLD:AAB0820  
 Neoblastobasis eurtella|GMPJA7140-21|BIOUG66629-B03|BOLD:AAB0820  
 Lepidoptera|GMPJA8862-21|BIOUG63985-D09|BOLD:AAA4901  
 Lepidoptera|GMPJA8863-21|BIOUG63985-D10|BOLD:AAA4901  
 Lepidoptera|GMPJA10088-21|BIOUG63985-A06|BOLD:AAA4901  
 Lepidoptera|GMPJA10135-21|BIOUG66563-D09|BOLD:AAA4901  
 Lepidoptera|GMPJA10136-21|BIOUG66563-D10|BOLD:AAA4901  
 Crambidae|GMPJA7166-21|BIOUG66629-D05|BOLD:AAA4901  
 Crambidae|GMPJA7164-21|BIOUG66629-D03|BOLD:AAA4901  
 Crambidae|GMPJA7155-21|BIOUG66629-C06|BOLD:AAA4901  
 Lepidoptera|GMPJA8867-21|BIOUG63985-E02|BOLD:AAA4901  
 Lepidoptera|GMPJA8866-21|BIOUG63985-E01|BOLD:AAA4901  
 Crambidae|GMPJA7156-21|BIOUG66629-C07|BOLD:AAA4901  
 Crambidae|GMPJA7126-21|BIOUG66629-A01|BOLD:AAA4901  
 Scopula emissaria|GMPJA10131-21|BIOUG66563-D05|BOLD:ACW2214  
 Scopula emissaria|GMPJA10132-21|BIOUG66563-D06|BOLD:ACW2214  
 Scopula emissaria|GMPJA4852-21|BIOUG63984-A07|BOLD:ACW2214  
 Trichoplusia ni|GMPJA030-21|BIOUG58255-C06|BOLD:AAC3410  
 Thysanoplusia|GMPJA2938-21|BIOUG58255-H04|BOLD:ACB6622  
 Plusiinae|GMPJA2941-21|BIOUG58255-H07|BOLD:AAM5409  
 Plusiinae|GMPJA8856-21|BIOUG63985-D03|BOLD:AAM5409  
 Chrysoideixis eriosoma|GMPJA10083-21|BIOUG63985-A01|BOLD:AAB3384  
 Chrysoideixis eriosoma|GMPJA8850-21|BIOUG63985-C09|BOLD:AAB3384  
 Lepidoptera|GMPJA8849-21|BIOUG63985-C08|BOLD:AAD6357  
 Eretmocera impactella|GMPJA3831-21|BIOUG65695-C07|BOLD:ACF7356  
 Herminiinae|GMPJA10089-21|BIOUG63985-A07|BOLD:ABY4999  
 Erebidae|GMPJA4907-21|BIOUG63984-F02|BOLD:AAB7802  
 Erebidae|GMPJA7127-21|BIOUG66629-A02|BOLD:ACW8183  
 Condica illecta|GMPJA002-21|BIOUG58255-A02|BOLD:AAB2411  
 Mythimna|GMPJA2926-21|BIOUG58255-G04|BOLD:AAB5610  
 Mythimna|GMPJA013-21|BIOUG58255-B01|BOLD:AAB5610  
 Mythimna|GMPJA2929-21|BIOUG58255-G07|BOLD:AAB5610  
 Mythimna|GMPJA2928-21|BIOUG58255-G06|BOLD:AAB5610  
 Mythimna|GMPJA2920-21|BIOUG58255-F10|BOLD:AAB5610  
 Mythimna|GMPJA028-21|BIOUG58255-C04|BOLD:AAB5610  
 Mythimna|GMPJA2932-21|BIOUG58255-G10|BOLD:AAB5610  
 Mythimna|GMPJA2927-21|BIOUG58255-G05|BOLD:AAB5610  
 Mythimna|GMPJA2919-21|BIOUG58255-F09|BOLD:AAB5610  
 Mythimna|GMPJA2933-21|BIOUG58255-G11|BOLD:AAB5610  
 Mythimna|GMPJA2924-21|BIOUG58255-G02|BOLD:AAB5610  
 Mythimna|GMPJA2917-21|BIOUG58255-F07|BOLD:AAB5610  
 Mythimna|GMPJA2916-21|BIOUG58255-F06|BOLD:AAB5610  
 Noctuidae|GMPJA2936-21|BIOUG58255-H02|BOLD:ACE6246  
 Noctuidae|GMPJA2939-21|BIOUG58255-H05|BOLD:ACE6246  
 Noctuidae|GMPJA4870-21|BIOUG63984-C01|BOLD:ACE6246  
 Eurema|GMPJA8852-21|BIOUG63985-C11|BOLD:AAA6082  
 Lepidoptera|GMPJA6299-21|BIOUG66620-C05|BOLD:AEJ1178  
 Cosmopteriginae|GMPJA310-21|BIOUG65658-F11|BOLD:ABX2833  
 Labdia stibogramma|GMPJA4968-21|BIOUG66606-C04|BOLD:AEY9803  
 Labdia stibogramma|GMPJA6298-21|BIOUG66620-C04|BOLD:AEY9803  
 Labdia stibogramma|GMPJA4972-21|BIOUG66606-C08|BOLD:AEY9803  
 Labdia stibogramma|GMPJA4967-21|BIOUG66606-C03|BOLD:AEY9803  
 Labdia stibogramma|GMPJA4965-21|BIOUG66606-C01|BOLD:AEY9803  
 Rivula|GMPJA7151-21|BIOUG66629-C02|BOLD:AEJ6869  
 Rivula|GMPJA6297-21|BIOUG66620-C03|BOLD:AEJ6869

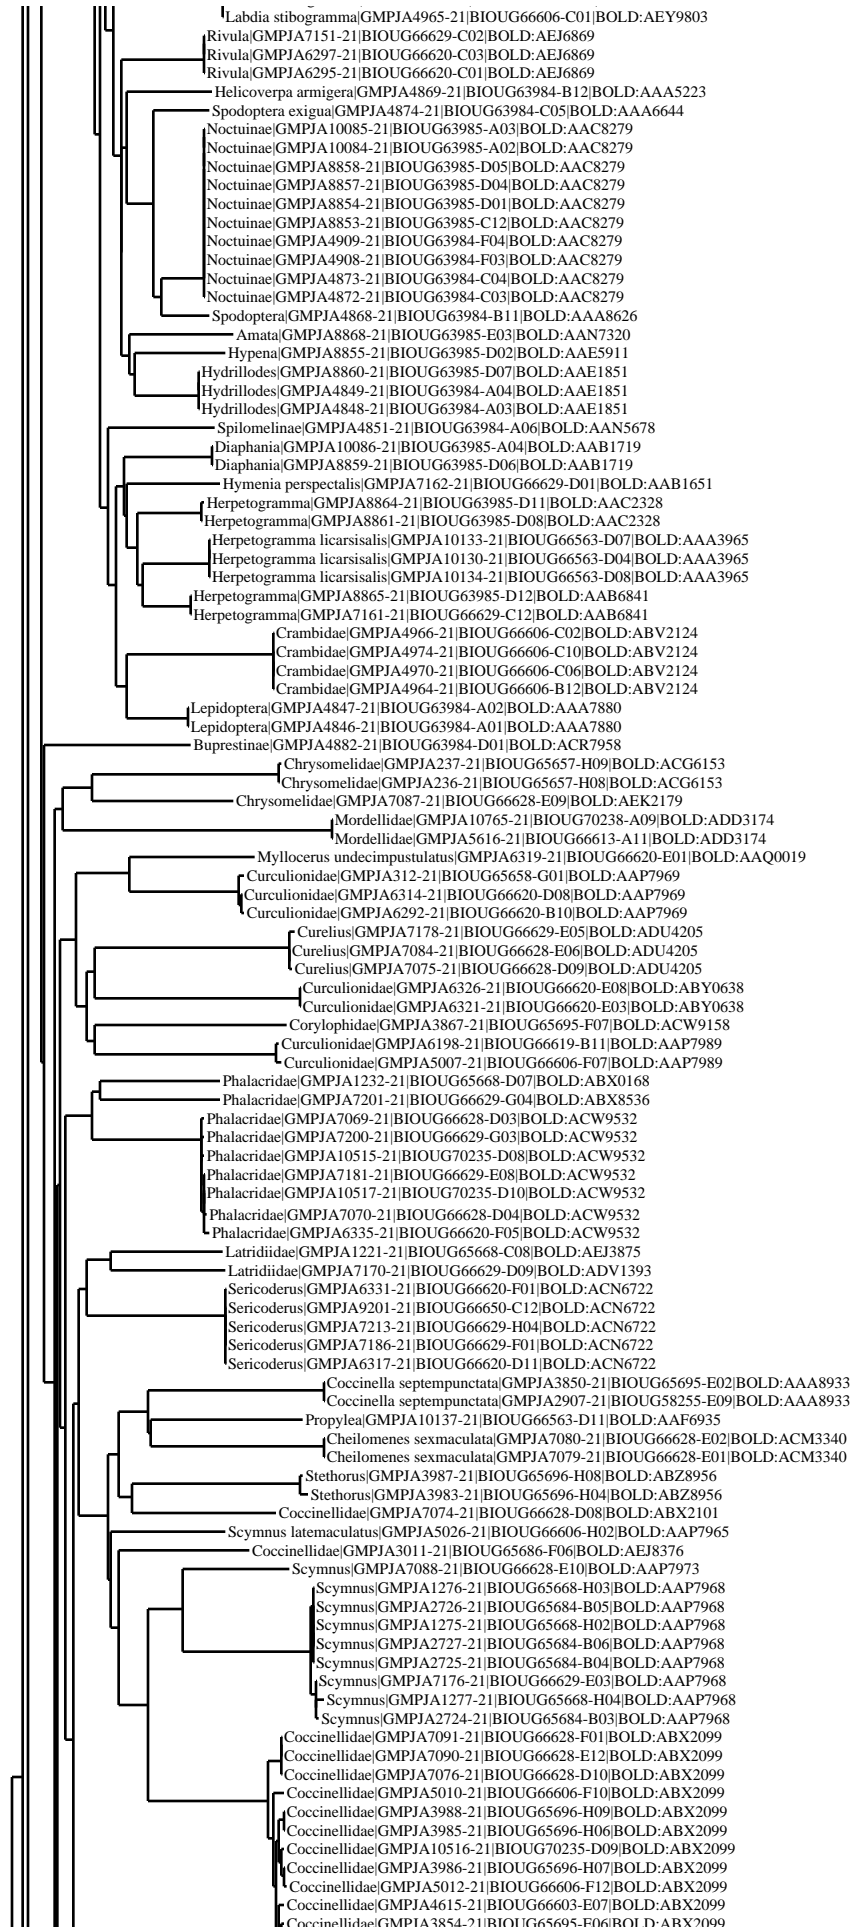

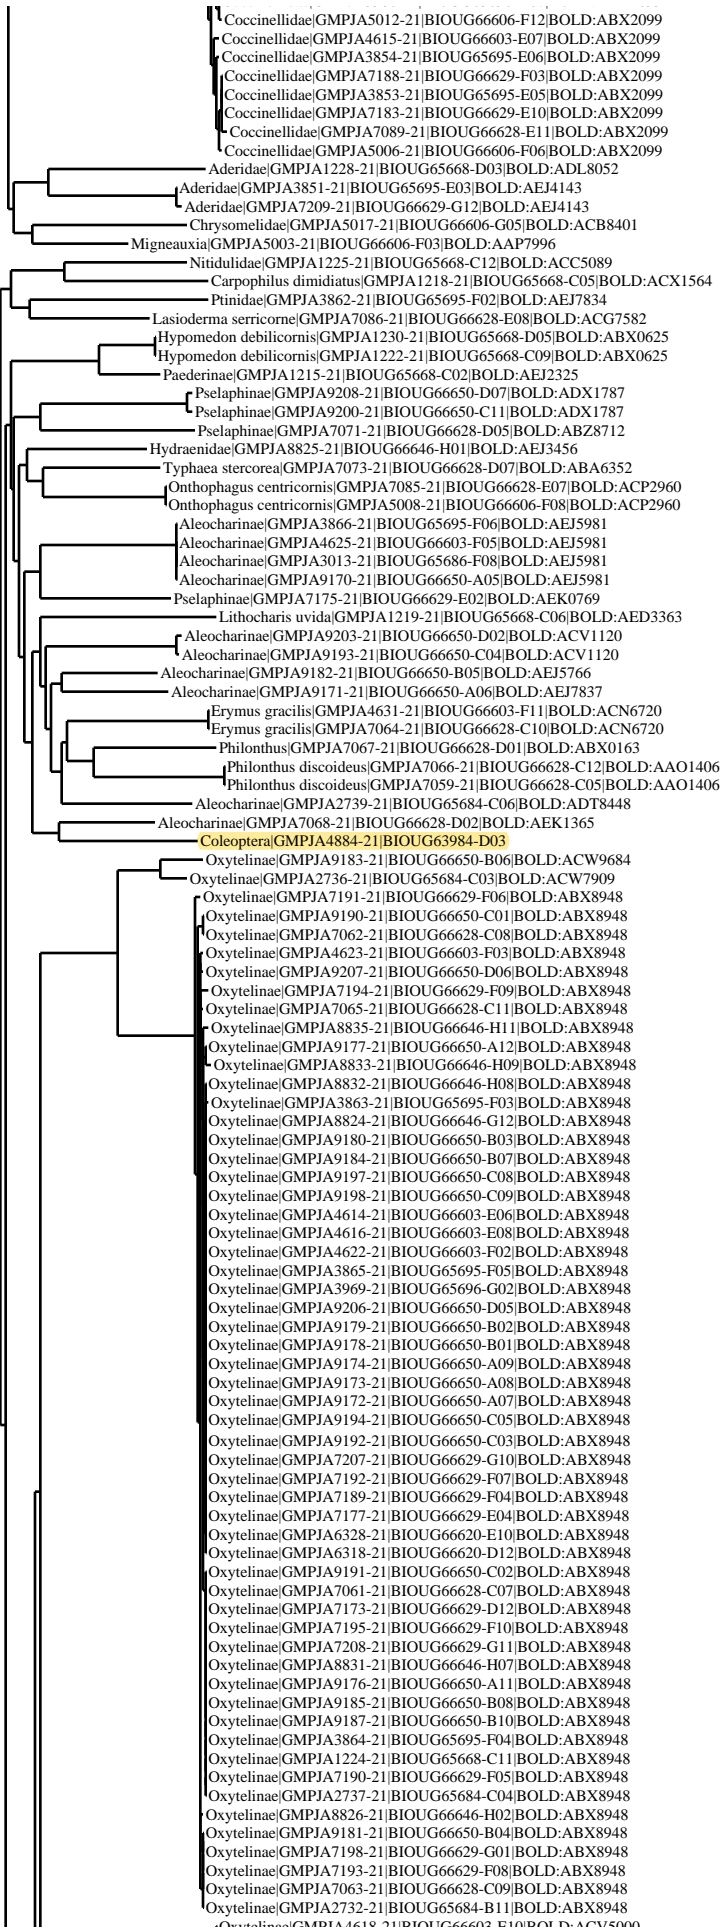

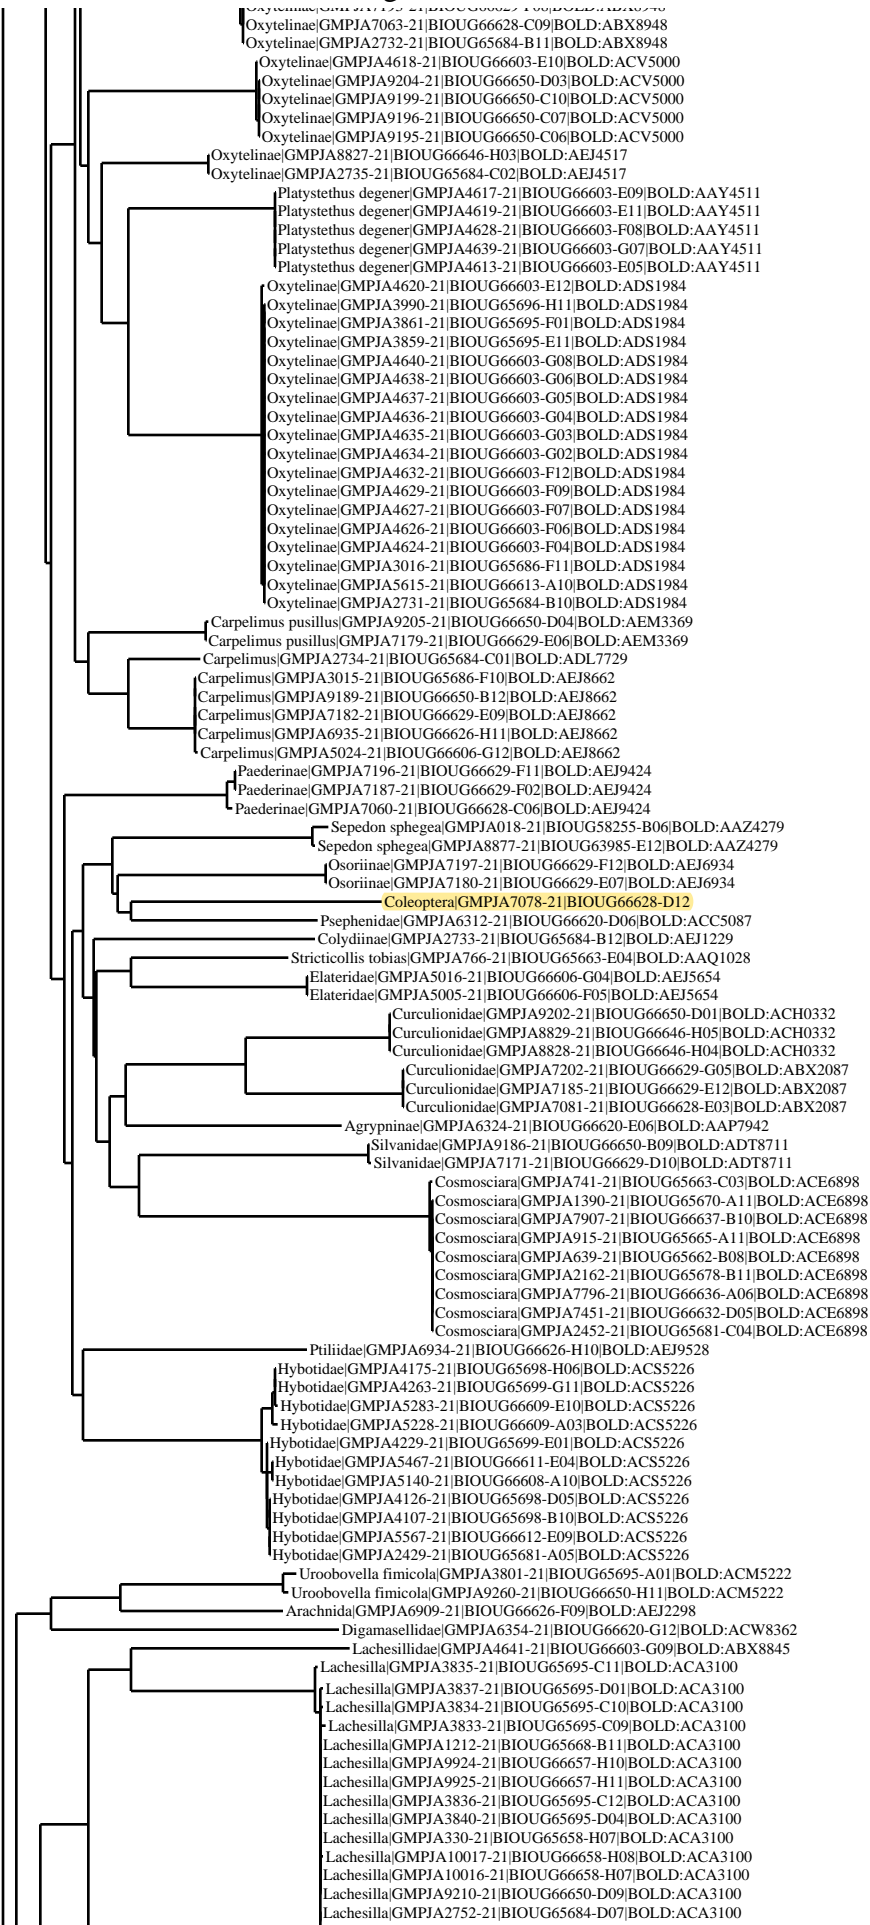

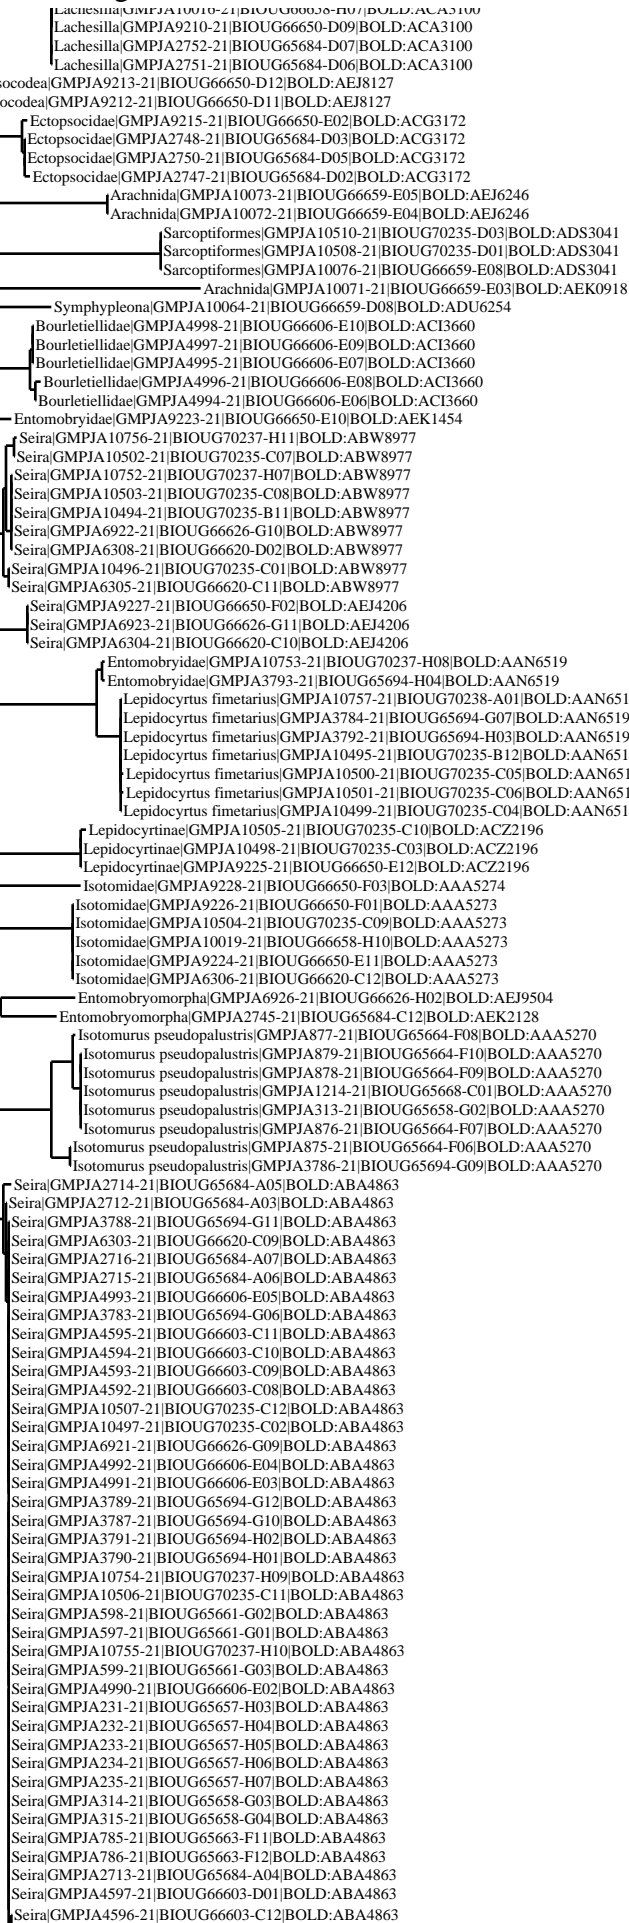

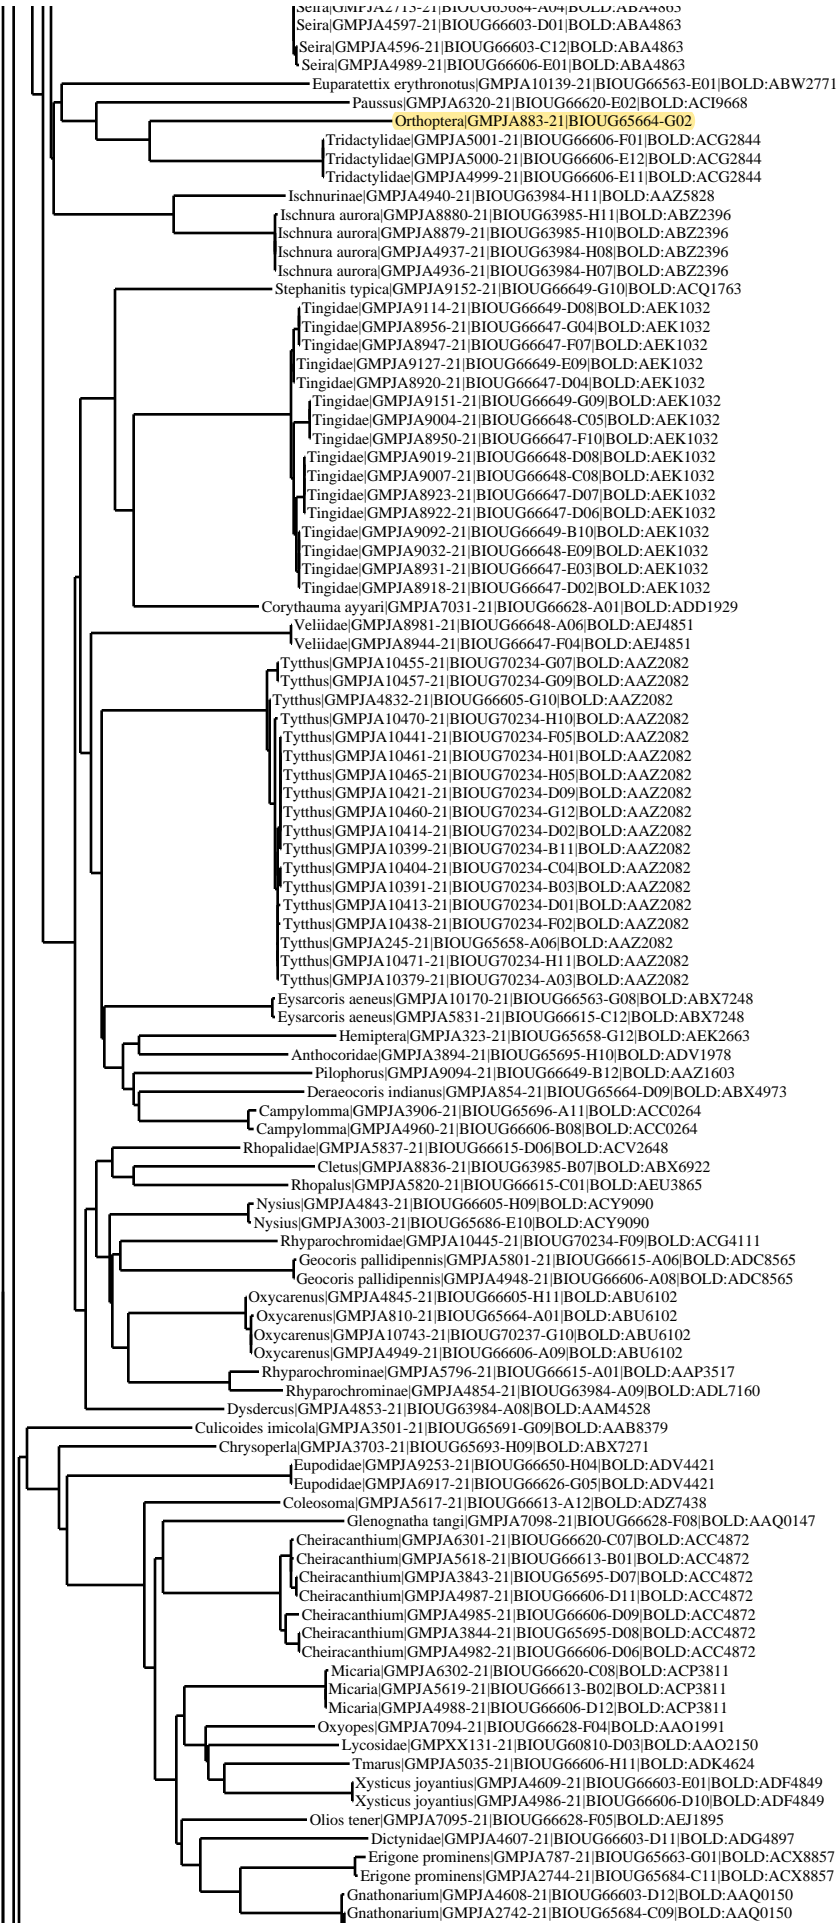



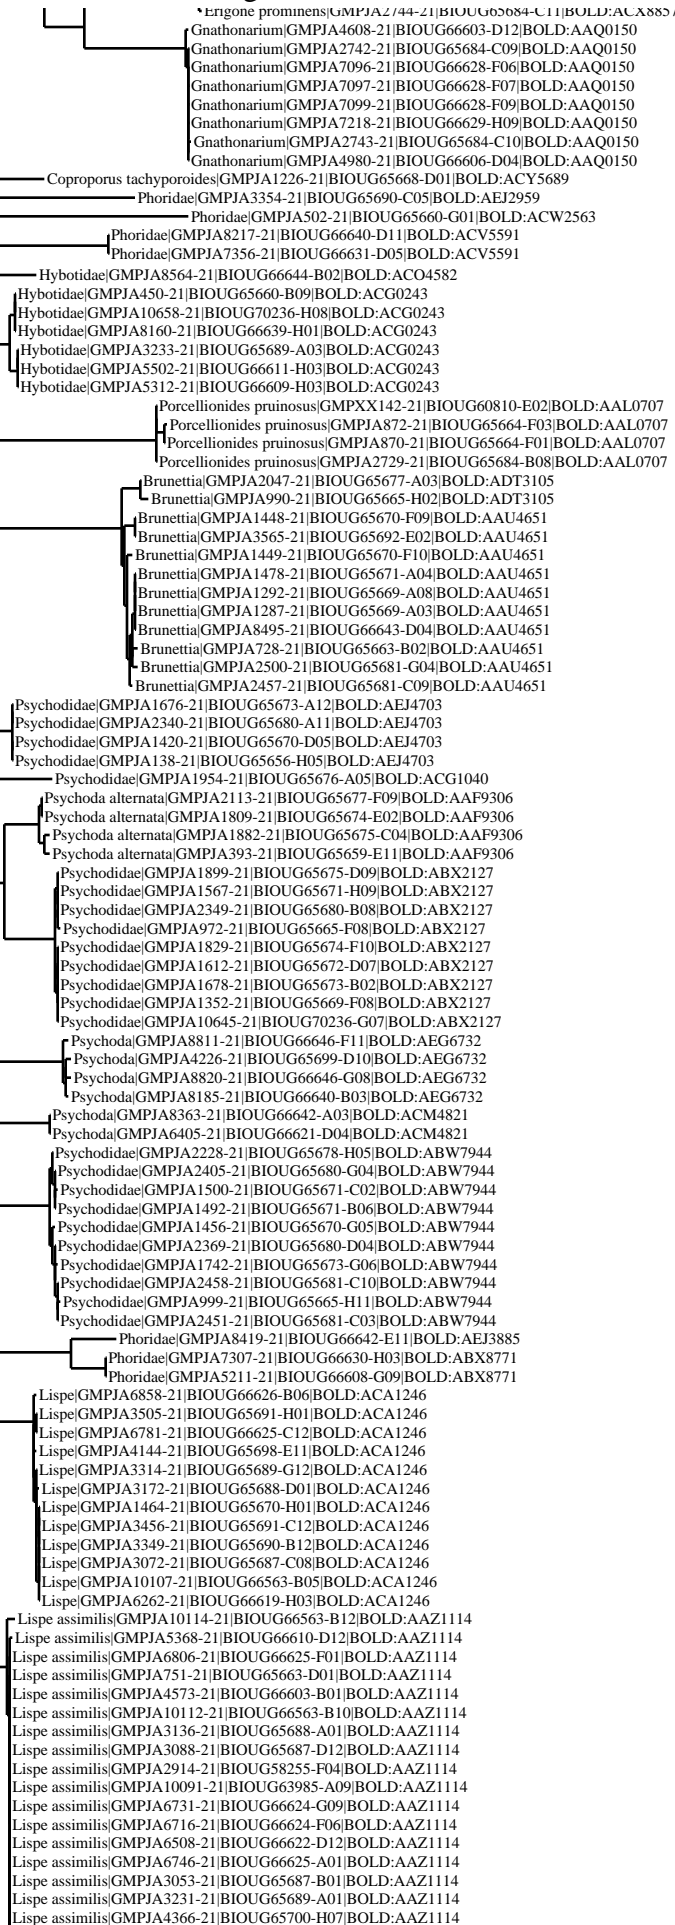

Lispe assimilis|GMPJA3053-21|BIOUG65687-B01|BOLD:AAZ1114  
 Lispe assimilis|GMPJA3231-21|BIOUG65689-A01|BOLD:AAZ1114  
 Lispe assimilis|GMPJA4366-21|BIOUG65700-H07|BOLD:AAZ1114  
 Lispe assimilis|GMPJA3611-21|BIOUG65693-A01|BOLD:AAZ1114  
 Lispe assimilis|GMPJA3622-21|BIOUG65693-A12|BOLD:AAZ1114  
 Lispe assimilis|GMPJA4097-21|BIOUG65698-A12|BOLD:AAZ1114  
 Lispe assimilis|GMPJA040-21|BIOUG58255-D04|BOLD:AAZ1114  
 Lispe assimilis|GMPJA230-21|BIOUG65657-H02|BOLD:AAZ1114  
 Lispe assimilis|GMPJA928-21|BIOUG65665-B12|BOLD:AAZ1114  
 Lispe assimilis|GMPJA2045-21|BIOUG65677-A01|BOLD:AAZ1114  
 Lispe assimilis|GMPJA2163-21|BIOUG65678-B12|BOLD:AAZ1114  
 Lispe assimilis|GMPJA3516-21|BIOUG65692-A01|BOLD:AAZ1114  
 Lispe assimilis|GMPJA3493-21|BIOUG65691-G01|BOLD:AAZ1114  
 Lispe assimilis|GMPJA4513-21|BIOUG66602-D12|BOLD:AAZ1114  
 Lispe assimilis|GMPJA6661-21|BIOUG66624-A11|BOLD:AAZ1114  
 Lispe assimilis|GMPJA4436-21|BIOUG66601-F06|BOLD:AAZ1114  
 Lispe assimilis|GMPJA182-21|BIOUG65657-D02|BOLD:AAZ1114  
 Lispe assimilis|GMPJA3450-21|BIOUG65691-C06|BOLD:AAZ1114  
 Lispe assimilis|GMPJA6840-21|BIOUG66625-H11|BOLD:AAZ1114  
 Lispe assimilis|GMPJA6189-21|BIOUG66619-B02|BOLD:AAZ1114  
 Lispe assimilis|GMPJA5582-21|BIOUG66612-F12|BOLD:AAZ1114  
 Lispe assimilis|GMPJA5576-21|BIOUG66612-F06|BOLD:AAZ1114  
 Lispe assimilis|GMPJA2756-21|BIOUG65684-D11|BOLD:AAZ1114  
 Lispe assimilis|GMPJA2496-21|BIOUG65681-F12|BOLD:AAZ1114  
 Lispe|GMPJA1155-21|BIOUG65667-F01|BOLD:ABW5571  
 Lispe|GMPJA1084-21|BIOUG65666-H01|BOLD:ABW5571  
 Lispe|GMPJA5594-21|BIOUG66612-G12|BOLD:ABW5492  
 Lispe|GMPJA4086-21|BIOUG65698-A01|BOLD:ABW5492  
 Lispe|GMPJA6687-21|BIOUG66624-D01|BOLD:ABW5492  
 Lispe|GMPJA6814-21|BIOUG66625-F09|BOLD:ABW5492  
 Lispe|GMPJA6744-21|BIOUG66624-H10|BOLD:ABW5492  
 Lispe|GMPJA6810-21|BIOUG66625-F05|BOLD:ABW5492  
 Lispe|GMPJA5344-21|BIOUG66610-B12|BOLD:ABW5492  
 Lispe|GMPJA4413-21|BIOUG66601-D07|BOLD:ABW5492  
 Lispe|GMPJA6563-21|BIOUG66623-A08|BOLD:ABW5492  
 Lispe|GMPJA3230-21|BIOUG65688-H11|BOLD:ABW5492  
 Lispe|GMPJA688-21|BIOUG65662-F09|BOLD:ABW5492  
 Lispe|GMPJA4355-21|BIOUG65700-G08|BOLD:ABW5492  
 Lispe|GMPJA6497-21|BIOUG66622-D01|BOLD:ABW5492  
 Lispe|GMPJA6638-21|BIOUG66623-G11|BOLD:ABW5492  
 Lispe|GMPJA6538-21|BIOUG66622-G06|BOLD:ABW5492  
 Lispe|GMPJA6389-21|BIOUG66621-B12|BOLD:ABW5492  
 Lispe|GMPJA5273-21|BIOUG66609-D12|BOLD:ABW5492  
 Lispe|GMPJA6822-21|BIOUG66625-G05|BOLD:ABW5492  
 Lispe|GMPJA6723-21|BIOUG66624-G01|BOLD:ABW5492  
 Lispe|GMPJA6468-21|BIOUG66622-A08|BOLD:ABW5492  
 Lispe|GMPJA6244-21|BIOUG66619-F09|BOLD:ABW5492  
 Lispe|GMPJA6627-21|BIOUG66623-F12|BOLD:ABW5492  
 Lispe|GMPJA5556-21|BIOUG66612-D10|BOLD:ABW5492  
 Lispe|GMPJA4281-21|BIOUG65700-A06|BOLD:ABW5492  
 Lispe|GMPJA6284-21|BIOUG66620-B02|BOLD:ABW5492  
 Lispe|GMPJA5510-21|BIOUG66611-H11|BOLD:ABW5492  
 Lispe|GMPJA5179-21|BIOUG66608-E01|BOLD:ABW5492  
 Lispe|GMPJA6562-21|BIOUG66623-A07|BOLD:ABW5492  
 Lispe|GMPJA10558-21|BIOUG70235-H03|BOLD:ABW5492  
 Lispe|GMPJA6877-21|BIOUG66626-D01|BOLD:ABW5492  
 Lispe|GMPJA5231-21|BIOUG66609-A06|BOLD:ABW5492  
 Lispe|GMPJA7969-21|BIOUG66637-G12|BOLD:ABW5492  
 Lispe|GMPJA1593-21|BIOUG65672-B12|BOLD:ABW5492  
 Lispe|GMPJA6460-21|BIOUG66621-H11|BOLD:ABW5492  
 Lispe|GMPJA656-21|BIOUG65662-D01|BOLD:ABW5492  
 Lispe|GMPJA10264-21|BIOUG70232-G06|BOLD:ABW5492  
 Lispe|GMPJA5225-21|BIOUG66608-H11|BOLD:ABW5492  
 Lispe|GMPJA5203-21|BIOUG66608-G01|BOLD:ABW5492  
 Lispe|GMPJA3426-21|BIOUG65691-A06|BOLD:ABW5492  
 Lispe|GMPJA4299-21|BIOUG65700-B12|BOLD:ABW5492  
 Lispe|GMPJA8277-21|BIOUG66641-A12|BOLD:ABW5492  
 Lispe|GMPJA6532-21|BIOUG66622-F12|BOLD:ABW5492  
 Lispe|GMPJA1118-21|BIOUG65667-B12|BOLD:ABW5492  
 Lispe|GMPJA5243-21|BIOUG66609-B06|BOLD:ABW5492  
 Lispe|GMPJA2234-21|BIOUG65678-H11|BOLD:ABW5492  
 Lispe|GMPJA2181-21|BIOUG65678-D06|BOLD:ABW5492  
 Lispe|GMPJA6834-21|BIOUG66625-H05|BOLD:ABW5492  
 Lispe|GMPJA3338-21|BIOUG65690-B01|BOLD:ABW5492  
 Lispe|GMPJA8093-21|BIOUG66639-B06|BOLD:ABW5492  
 Lispe|GMPJA5522-21|BIOUG66612-A12|BOLD:ABW5492  
 Lispe|GMPJA10192-21|BIOUG70232-A06|BOLD:ABW5492  
 Lispe|GMPJA5523-21|BIOUG66612-B01|BOLD:ABW5492  
 Lispe|GMPJA5196-21|BIOUG66608-F06|BOLD:ABW5492  
 Lispe|GMPJA5107-21|BIOUG66607-F12|BOLD:ABW5492  
 Lispe|GMPJA5380-21|BIOUG66610-E12|BOLD:ABW5492  
 Lispe|GMPJA6407-21|BIOUG66621-D06|BOLD:ABW5492  
 Lispe|GMPJA6707-21|BIOUG66624-E09|BOLD:ABW5492  
 Lispe|GMPJA6823-21|BIOUG66625-G06|BOLD:ABW5492  
 Lispe|GMPJA8640-21|BIOUG66644-H06|BOLD:ABW5492  
 Lispe|GMPJA10368-21|BIOUG70233-H03|BOLD:ABW5492  
 Lispe|GMPJA10116-21|BIOUG65653-C02|BOLD:ABW5492  
 Lispe|GMPJA10200-21|BIOUG70232-B02|BOLD:ABW5492  
 Lispe|GMPJA4460-21|BIOUG66601-H06|BOLD:ABW5492  
 Lispe|GMPJA1106-21|BIOUG65667-A12|BOLD:ABW5492  
 Lispe|GMPJA1949-21|BIOUG65675-H11|BOLD:ABW5492  
 Lispe|GMPJA205-21|BIOUG65657-F01|BOLD:ABW5492  
 Lispe|GMPJA4540-21|BIOUG66602-G03|BOLD:ABW5492  
 Lispe|GMPJA5095-21|BIOUG66607-E12|BOLD:ABW5492  
 Lispe|GMPJA5321-21|BIOUG66610-A01|BOLD:ABW5492  
 Lispe|GMPJA1758-21|BIOUG65673-H10|BOLD:ABW5492  
 Lispe|GMPJA6496-21|BIOUG66622-C12|BOLD:ABW5492  
 Lispe|GMPJA6509-21|BIOUG66622-E01|BOLD:ABW5492  
 Lispe|GMPJA6450-21|BIOUG66621-H01|BOLD:ABW5492  
 Lispe|GMPJA631-21|BIOUG65662-A12|BOLD:ABW5492  
 Lispe|GMPJA085-21|BIOUG65656-C12|BOLD:ABW5492  
 Lispe|GMPJA7826-21|BIOUG66636-C12|BOLD:ABW5492  
 Lispe|GMPJA6604-21|BIOUG66623-E01|BOLD:ABW5492

Lispe|GMPJA085-21|BIOUG65656-C12|BOLD:ABW5492  
Lispe|GMPJA7826-21|BIOUG66636-C12|BOLD:ABW5492  
Lispe|GMPJA6604-21|BIOUG66623-E01|BOLD:ABW5492  
Lispe|GMPJA6598-21|BIOUG66623-D07|BOLD:ABW5492  
Lispe|GMPJA6555-21|BIOUG66622-H11|BOLD:ABW5492  
Lispe|GMPJA6495-21|BIOUG66622-C11|BOLD:ABW5492  
Lispe|GMPJA3515-21|BIOUG65691-H11|BOLD:ABW5492  
Lispe|GMPJA5178-21|BIOUG66608-D12|BOLD:ABW5492  
Lispe|GMPJA10599-21|BIOUG70236-C09|BOLD:ABW5492  
Lispe|GMPJA4015-21|BIOUG65697-C01|BOLD:ABW5492  
Lispe|GMPJA905-21|BIOUG65665-A01|BOLD:ABW5492  
Lispe|GMPJA3399-21|BIOUG65690-G02|BOLD:ABW5492  
Lispe|GMPJA10532-21|BIOUG70235-F01|BOLD:ABW5492  
Lispe|GMPJA10229-21|BIOUG70232-D07|BOLD:ABW5492  
Lispe|GMPJA6784-21|BIOUG66625-D03|BOLD:ABW5492  
Lispe|GMPJA4062-21|BIOUG65697-F12|BOLD:ABW5492  
Lispe|GMPJA10169-21|BIOUG66563-G07|BOLD:ABW5492  
Lispe|GMPJA6639-21|BIOUG66623-G12|BOLD:ABW5492  
Lispe|GMPJA5374-21|BIOUG66610-E06|BOLD:ABW5492  
Lispe|GMPJA2419-21|BIOUG65680-H06|BOLD:ABW5492  
Lispe|GMPJA4312-21|BIOUG65700-D01|BOLD:ABW5492  
Lispe|GMPJA6799-21|BIOUG66625-E06|BOLD:ABW5492  
Lispe|GMPJA5558-21|BIOUG66612-D12|BOLD:ABW5492  
Lispe|GMPJA6787-21|BIOUG66625-D06|BOLD:ABW5492  
Lispe|GMPJA4264-21|BIOUG65699-G12|BOLD:ABW5492  
Lispe|GMPJA3074-21|BIOUG65687-C10|BOLD:ABW5492  
Lispe|GMPJA5106-21|BIOUG66607-F11|BOLD:ABW5492  
Lispe|GMPJA4430-21|BIOUG66601-E12|BOLD:ABW5492  
Lispe|GMPJA3048-21|BIOUG65687-A08|BOLD:ABW5492  
Lispe|GMPJA5101-21|BIOUG66607-F06|BOLD:ABW5492  
Lispe|GMPJA10566-21|BIOUG70235-H11|BOLD:ABW5492  
Lispe|GMPJA10553-21|BIOUG70235-G10|BOLD:ABW5492  
Lispe|GMPJA537-21|BIOUG65661-B01|BOLD:ABW5492  
Lispe|GMPJA10603-21|BIOUG70236-D01|BOLD:ABW5492  
Lispe|GMPJA5403-21|BIOUG66610-G11|BOLD:ABW5492  
Lispe|GMPJA10644-21|BIOUG70236-G06|BOLD:ABW5492  
Lispe|GMPJA6865-21|BIOUG66626-C01|BOLD:ABW5492  
Lispe|GMPJA4341-21|BIOUG65700-F06|BOLD:ABW5492  
Lispe|GMPJA6886-21|BIOUG66626-D10|BOLD:ABW5492  
Lispe|GMPJA6870-21|BIOUG66626-C06|BOLD:ABW5492  
Lispe|GMPJA6830-21|BIOUG66625-H01|BOLD:ABW5492  
Lispe|GMPJA6800-21|BIOUG66625-E07|BOLD:ABW5492  
Lispe|GMPJA4437-21|BIOUG66601-F07|BOLD:ABW5492  
Lispe|GMPJA4359-21|BIOUG65700-G12|BOLD:ABW5492  
Lispe|GMPJA6675-21|BIOUG66624-C01|BOLD:ABW5492  
Lispe|GMPJA6558-21|BIOUG66623-A03|BOLD:ABW5492  
Lispe|GMPJA10268-21|BIOUG70232-G10|BOLD:ABW5492  
Lispe|GMPJA4571-21|BIOUG66603-A11|BOLD:ABW5492  
Lispe|GMPJA6544-21|BIOUG66622-G12|BOLD:ABW5492  
Lispe|GMPJA6500-21|BIOUG66622-D04|BOLD:ABW5492  
Lispe|GMPJA6285-21|BIOUG66620-B03|BOLD:ABW5492  
Lispe|GMPJA6721-21|BIOUG66624-F11|BOLD:ABW5492  
Lispe|GMPJA6184-21|BIOUG66619-A09|BOLD:ABW5492  
Lispe|GMPJA6461-21|BIOUG66622-A01|BOLD:ABW5492  
Lispe|GMPJA3373-21|BIOUG65690-D12|BOLD:ABW5492  
Lispe|GMPJA3361-21|BIOUG65690-C12|BOLD:ABW5492  
Lispe|GMPJA3160-21|BIOUG65688-C01|BOLD:ABW5492  
Lispe|GMPJA8099-21|BIOUG66639-B12|BOLD:ABW5492  
Lispe|GMPJA6426-21|BIOUG66621-F01|BOLD:ABW5492  
Lispe|GMPJA5601-21|BIOUG66612-H07|BOLD:ABW5492  
Lispe|GMPJA5587-21|BIOUG66612-G05|BOLD:ABW5492  
Lispe|GMPJA5143-21|BIOUG66608-B01|BOLD:ABW5492  
Lispe|GMPJA5130-21|BIOUG66607-H11|BOLD:ABW5492  
Lispe|GMPJA5108-21|BIOUG66607-G01|BOLD:ABW5492  
Lispe|GMPJA6493-21|BIOUG66622-C09|BOLD:ABW5492  
Lispe|GMPJA6413-21|BIOUG66621-D12|BOLD:ABW5492  
Lispe|GMPJA4102-21|BIOUG65698-B05|BOLD:ABW5492  
Lispe|GMPJA4444-21|BIOUG66601-G02|BOLD:ABW5492  
Lispe|GMPJA6751-21|BIOUG66625-A06|BOLD:ABW5492  
Lispe|GMPJA6694-21|BIOUG66624-D08|BOLD:ABW5492  
Lispe|GMPJA4122-21|BIOUG65698-D01|BOLD:ABW5492  
Lispe|GMPJA4192-21|BIOUG65699-A12|BOLD:ABW5492  
Lispe|GMPJA150-21|BIOUG65657-A06|BOLD:ABW5492  
Lispe|GMPJA370-21|BIOUG65659-C12|BOLD:ABW5492  
Lispe|GMPJA1083-21|BIOUG65666-G12|BOLD:ABW5492  
Lispe|GMPJA1131-21|BIOUG65667-D01|BOLD:ABW5492  
Lispe|GMPJA1172-21|BIOUG65667-G06|BOLD:ABW5492  
Lispe|GMPJA1344-21|BIOUG65669-E12|BOLD:ABW5492  
Lispe|GMPJA4516-21|BIOUG66602-E03|BOLD:ABW5492  
Lispe|GMPJA10616-21|BIOUG70236-E02|BOLD:ABW5492  
Lispe|GMPJA3421-21|BIOUG65691-A01|BOLD:ABW5492  
Lispe|GMPJA7327-21|BIOUG66631-A12|BOLD:ABW5492  
Lispe|GMPJA6818-21|BIOUG66625-G01|BOLD:ABW5492  
Lispe|GMPJA6237-21|BIOUG66619-F02|BOLD:ABW5492  
Lispe|GMPJA6699-21|BIOUG66624-E01|BOLD:ABW5492  
Lispe|GMPJA6704-21|BIOUG66624-E06|BOLD:ABW5492  
Lispe|GMPJA3049-21|BIOUG65687-A09|BOLD:ABW5492  
Lispe|GMPJA4358-21|BIOUG65700-G11|BOLD:ABW5492  
Lispe|GMPJA5600-21|BIOUG66612-H06|BOLD:ABW5492  
Lispe|GMPJA5416-21|BIOUG66611-A01|BOLD:ABW5492  
Lispe|GMPJA3469-21|BIOUG65691-E01|BOLD:ABW5492  
Lispe|GMPJA5216-21|BIOUG66608-H02|BOLD:ABW5492  
Lispe|GMPJA5041-21|BIOUG66607-A06|BOLD:ABW5492  
Lispe|GMPJA6645-21|BIOUG66623-H06|BOLD:ABW5492  
Lispe|GMPJA5413-21|BIOUG66610-H09|BOLD:ABW5492  
Lispe|GMPJA5338-21|BIOUG66610-B06|BOLD:ABW5492  
Lispe|GMPJA2433-21|BIOUG65681-A09|BOLD:ABW5492  
Lispe|GMPJA6816-21|BIOUG66625-F11|BOLD:ABW5492  
Lispe|GMPJA6889-21|BIOUG66626-E01|BOLD:ABW5492  
Lispe|GMPJA6603-21|BIOUG66623-D12|BOLD:ABW5492  
Lispe|GMPJA6595-21|BIOUG66623-D04|BOLD:ABW5492  
Lispe|GMPJA394-21|BIOUG65659-E12|BOLD:ABW5492  
Lispe|GMPJA10187-21|BIOUG70232-A01|BOLD:ABW5492

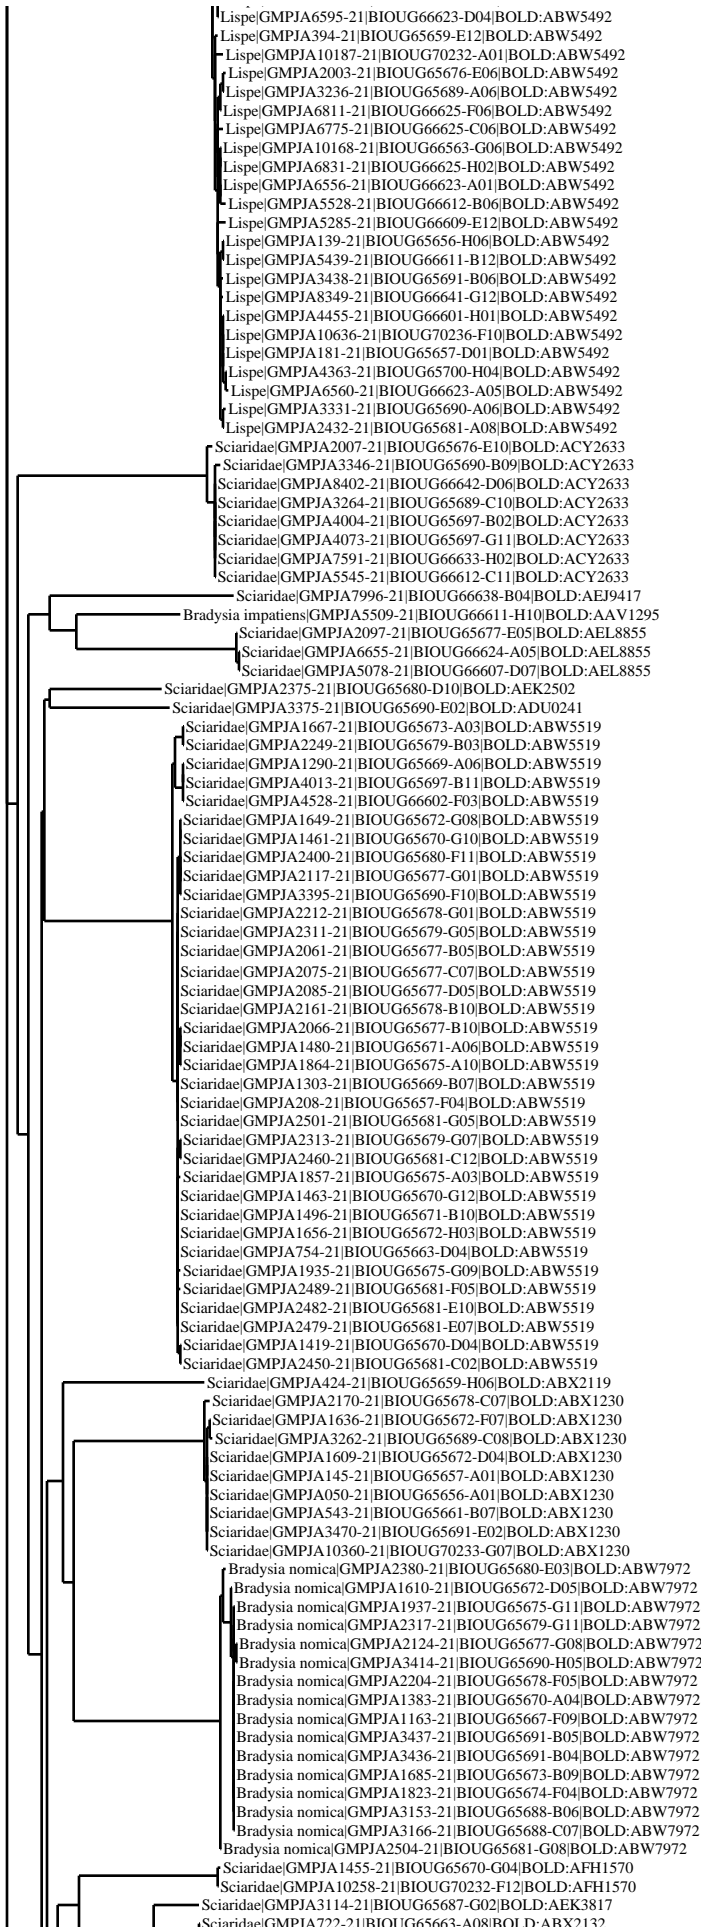

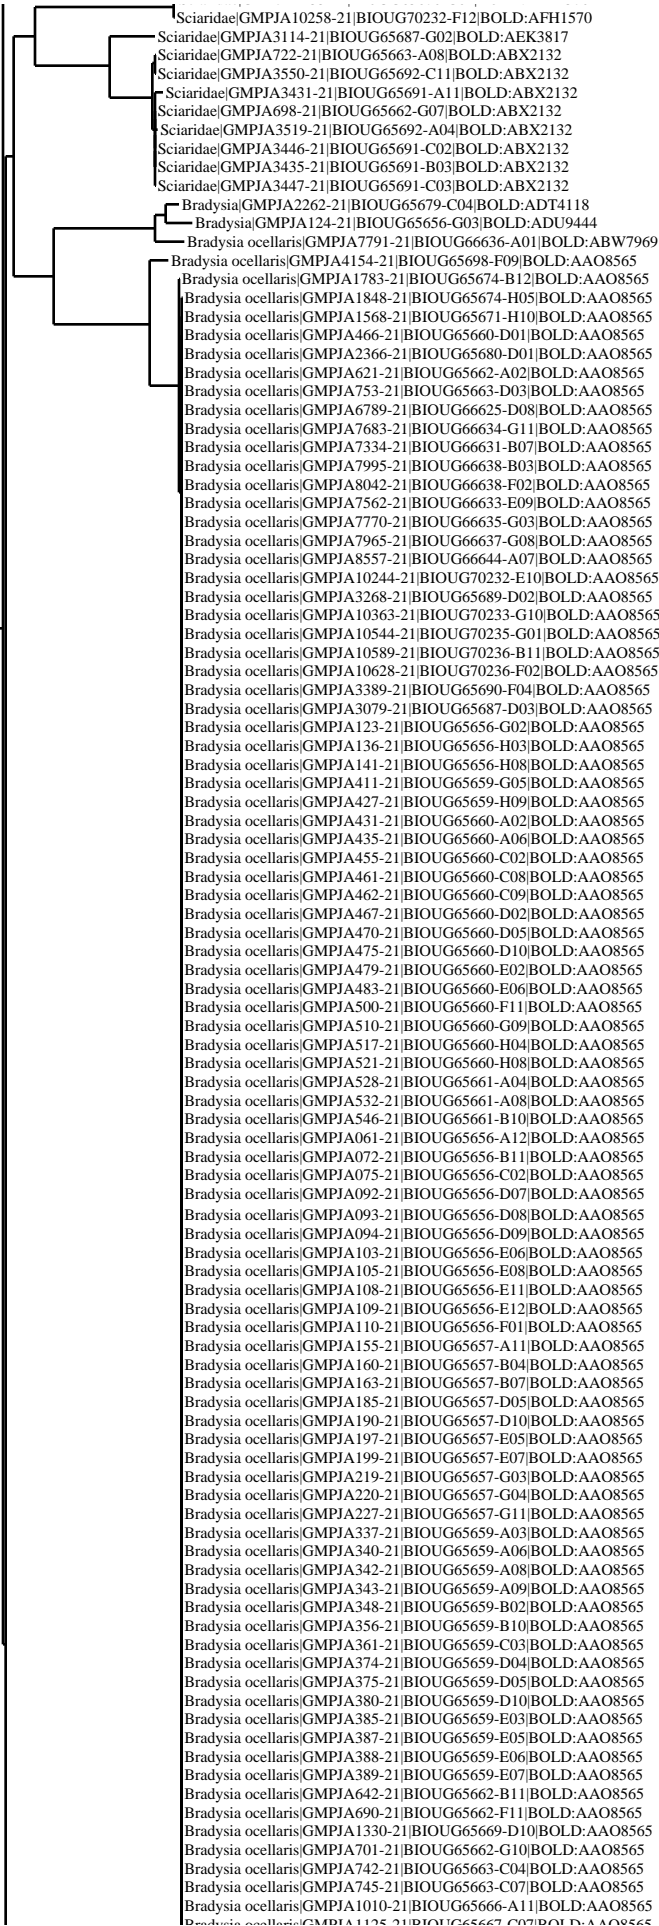

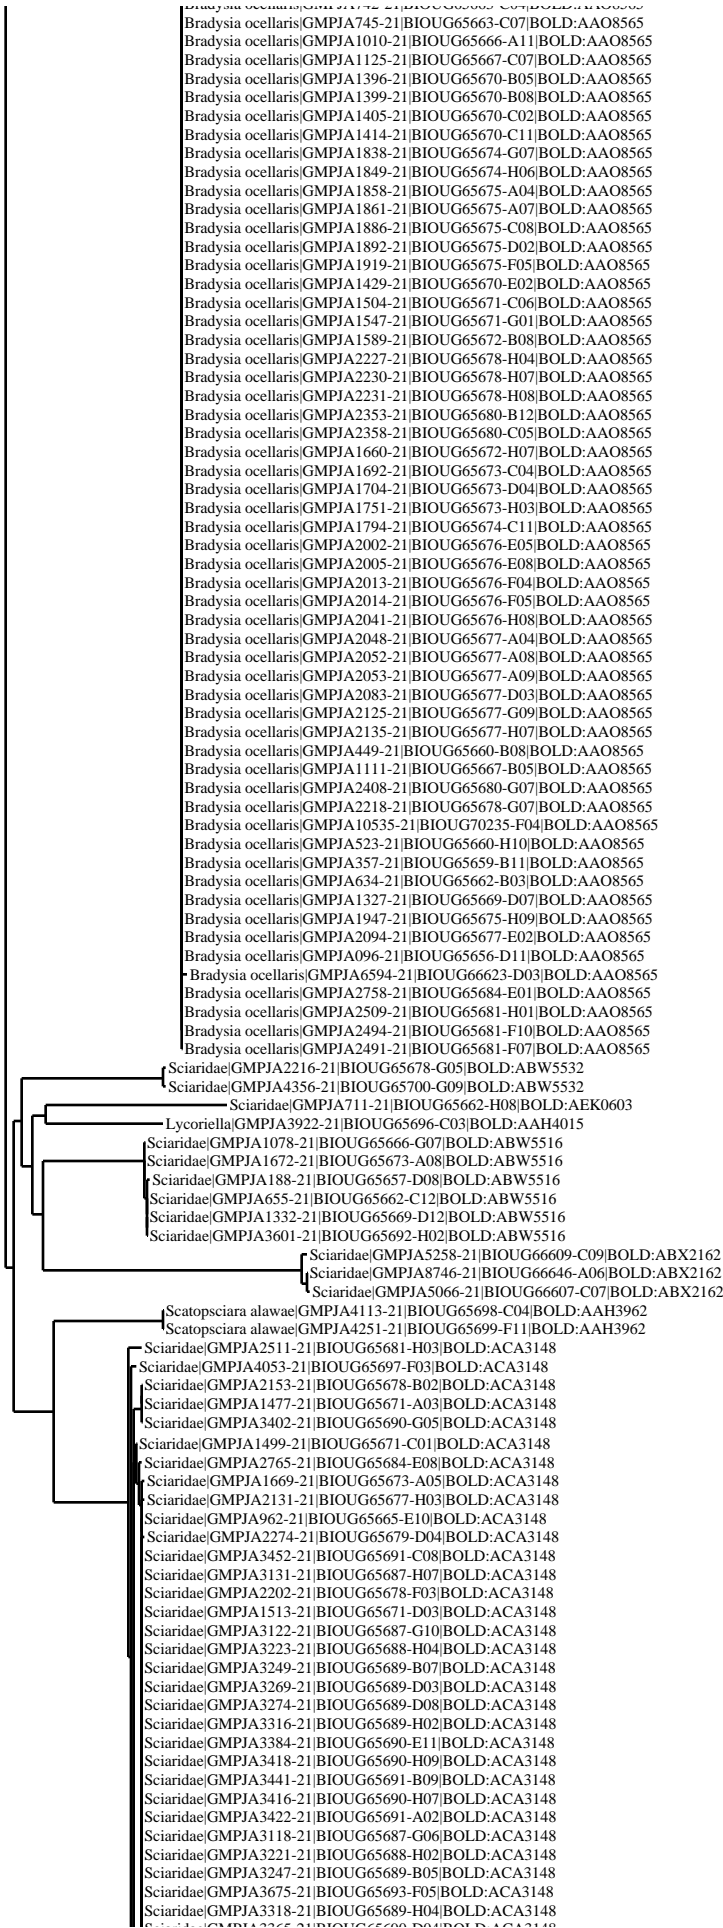

Sciaridae|GMPJA324-21|BIOUG65691-B03|BOLD:ACA3148  
 Sciaridae|GMPJA3675-21|BIOUG65693-F05|BOLD:ACA3148  
 Sciaridae|GMPJA3318-21|BIOUG65689-H04|BOLD:ACA3148  
 Sciaridae|GMPJA3365-21|BIOUG65690-D04|BOLD:ACA3148  
 Sciaridae|GMPJA3471-21|BIOUG65691-E03|BOLD:ACA3148  
 Sciaridae|GMPJA3482-21|BIOUG65691-F02|BOLD:ACA3148  
 Sciaridae|GMPJA3500-21|BIOUG65691-G08|BOLD:ACA3148  
 Sciaridae|GMPJA3509-21|BIOUG65691-H05|BOLD:ACA3148  
 Sciaridae|GMPJA3512-21|BIOUG65691-H08|BOLD:ACA3148  
 Sciaridae|GMPJA4233-21|BIOUG65699-E05|BOLD:ACA3148  
 Sciaridae|GMPJA3532-21|BIOUG65692-B05|BOLD:ACA3148  
 Sciaridae|GMPJA3558-21|BIOUG65692-D07|BOLD:ACA3148  
 Sciaridae|GMPJA3577-21|BIOUG65692-F02|BOLD:ACA3148  
 Sciaridae|GMPJA3587-21|BIOUG65692-F12|BOLD:ACA3148  
 Sciaridae|GMPJA3595-21|BIOUG65692-G08|BOLD:ACA3148  
 Sciaridae|GMPJA3596-21|BIOUG65692-G09|BOLD:ACA3148  
 Sciaridae|GMPJA3597-21|BIOUG65692-G10|BOLD:ACA3148  
 Sciaridae|GMPJA3613-21|BIOUG65693-A03|BOLD:ACA3148  
 Sciaridae|GMPJA3629-21|BIOUG65693-B07|BOLD:ACA3148  
 Sciaridae|GMPJA3642-21|BIOUG65693-C08|BOLD:ACA3148  
 Sciaridae|GMPJA3649-21|BIOUG65693-D03|BOLD:ACA3148  
 Sciaridae|GMPJA3656-21|BIOUG65693-D10|BOLD:ACA3148  
 Sciaridae|GMPJA3660-21|BIOUG65693-E02|BOLD:ACA3148  
 Sciaridae|GMPJA3928-21|BIOUG65696-C09|BOLD:ACA3148  
 Sciaridae|GMPJA4174-21|BIOUG65698-H05|BOLD:ACA3148  
 Sciaridae|GMPJA1293-21|BIOUG65669-A09|BOLD:ACA3148  
 Sciaridae|GMPJA1319-21|BIOUG65669-C11|BOLD:ACA3148  
 Sciaridae|GMPJA1348-21|BIOUG65669-F04|BOLD:ACA3148  
 Sciaridae|GMPJA1382-21|BIOUG65670-A03|BOLD:ACA3148  
 Sciaridae|GMPJA1415-21|BIOUG65670-C12|BOLD:ACA3148  
 Sciaridae|GMPJA1804-21|BIOUG65674-D09|BOLD:ACA3148  
 Sciaridae|GMPJA1812-21|BIOUG65674-E05|BOLD:ACA3148  
 Sciaridae|GMPJA1824-21|BIOUG65674-F05|BOLD:ACA3148  
 Sciaridae|GMPJA1833-21|BIOUG65674-G02|BOLD:ACA3148  
 Sciaridae|GMPJA1874-21|BIOUG65675-B08|BOLD:ACA3148  
 Sciaridae|GMPJA1903-21|BIOUG65675-E01|BOLD:ACA3148  
 Sciaridae|GMPJA1928-21|BIOUG65675-G02|BOLD:ACA3148  
 Sciaridae|GMPJA1929-21|BIOUG65675-G03|BOLD:ACA3148  
 Sciaridae|GMPJA1936-21|BIOUG65675-G10|BOLD:ACA3148  
 Sciaridae|GMPJA1422-21|BIOUG65670-D07|BOLD:ACA3148  
 Sciaridae|GMPJA1490-21|BIOUG65671-B04|BOLD:ACA3148  
 Sciaridae|GMPJA1517-21|BIOUG65671-D07|BOLD:ACA3148  
 Sciaridae|GMPJA1522-21|BIOUG65671-D12|BOLD:ACA3148  
 Sciaridae|GMPJA1584-21|BIOUG65672-B03|BOLD:ACA3148  
 Sciaridae|GMPJA1631-21|BIOUG65672-F02|BOLD:ACA3148  
 Sciaridae|GMPJA1632-21|BIOUG65672-F03|BOLD:ACA3148  
 Sciaridae|GMPJA1633-21|BIOUG65672-F04|BOLD:ACA3148  
 Sciaridae|GMPJA2182-21|BIOUG65678-D07|BOLD:ACA3148  
 Sciaridae|GMPJA2195-21|BIOUG65678-E08|BOLD:ACA3148  
 Sciaridae|GMPJA2199-21|BIOUG65678-E12|BOLD:ACA3148  
 Sciaridae|GMPJA2209-21|BIOUG65678-F10|BOLD:ACA3148  
 Sciaridae|GMPJA2265-21|BIOUG65679-C07|BOLD:ACA3148  
 Sciaridae|GMPJA2324-21|BIOUG65679-H06|BOLD:ACA3148  
 Sciaridae|GMPJA2339-21|BIOUG65680-A10|BOLD:ACA3148  
 Sciaridae|GMPJA2345-21|BIOUG65680-B04|BOLD:ACA3148  
 Sciaridae|GMPJA2359-21|BIOUG65680-C06|BOLD:ACA3148  
 Sciaridae|GMPJA1668-21|BIOUG65673-A04|BOLD:ACA3148  
 Sciaridae|GMPJA1680-21|BIOUG65673-B04|BOLD:ACA3148  
 Sciaridae|GMPJA1963-21|BIOUG65676-B02|BOLD:ACA3148  
 Sciaridae|GMPJA1993-21|BIOUG65676-D08|BOLD:ACA3148  
 Sciaridae|GMPJA2050-21|BIOUG65677-A06|BOLD:ACA3148  
 Sciaridae|GMPJA1756-21|BIOUG65673-H08|BOLD:ACA3148  
 Sciaridae|GMPJA1739-21|BIOUG65673-G03|BOLD:ACA3148  
 Sciaridae|GMPJA2207-21|BIOUG65678-F08|BOLD:ACA3148  
 Sciaridae|GMPJA1548-21|BIOUG65671-G02|BOLD:ACA3148  
 Sciaridae|GMPJA1970-21|BIOUG65676-B09|BOLD:ACA3148  
 Sciaridae|GMPJA2029-21|BIOUG65676-G08|BOLD:ACA3148  
 Sciaridae|GMPJA2073-21|BIOUG65677-C05|BOLD:ACA3148  
 Sciaridae|GMPJA2087-21|BIOUG65677-D07|BOLD:ACA3148  
 Sciaridae|GMPJA2100-21|BIOUG65677-E08|BOLD:ACA3148  
 Sciaridae|GMPJA2119-21|BIOUG65677-G03|BOLD:ACA3148  
 Sciaridae|GMPJA2154-21|BIOUG65678-B03|BOLD:ACA3148  
 Sciaridae|GMPJA1862-21|BIOUG65675-A08|BOLD:ACA3148  
 Sciaridae|GMPJA1601-21|BIOUG65672-C08|BOLD:ACA3148  
 Sciaridae|GMPJA3057-21|BIOUG65687-B05|BOLD:ACA3148  
 Sciaridae|GMPJA2088-21|BIOUG65677-D08|BOLD:ACA3148  
 Sciaridae|GMPJA1341-21|BIOUG65669-E09|BOLD:ACA3148  
 Sciaridae|GMPJA3116-21|BIOUG65687-G04|BOLD:ACA3148  
 Sciaridae|GMPJA3538-21|BIOUG65692-B11|BOLD:ACA3148  
 Sciaridae|GMPJA3187-21|BIOUG65688-E04|BOLD:ACA3148  
 Sciaridae|GMPJA2519-21|BIOUG65681-H11|BOLD:ACA3148  
 Sciaridae|GMPJA2514-21|BIOUG65681-H06|BOLD:ACA3148  
 Sciaridae|GMPJA2467-21|BIOUG65681-D07|BOLD:ACA3148  
 Sciaridae|GMPJA2466-21|BIOUG65681-D06|BOLD:ACA3148  
 Sciaridae|GMPJA2464-21|BIOUG65681-D04|BOLD:ACA3148  
 Sciaridae|GMPJA2441-21|BIOUG65681-B05|BOLD:ACA3148  
 Sciaridae|GMPJA3104-21|BIOUG65687-F04|BOLD:ACA3148  
 Sciaridae|GMPJA2165-21|BIOUG65678-C02|BOLD:ACA3148  
 Sciaridae|GMPJA3489-21|BIOUG65691-F09|BOLD:ACA3148  
 Sciaridae|GMPJA1379-21|BIOUG65669-H11|BOLD:ACA3148  
 Sciaridae|GMPJA2498-21|BIOUG65681-G02|BOLD:ACA3148  
 Sciaridae|GMPJA2492-21|BIOUG65681-F08|BOLD:ACA3148  
 Sciaridae|GMPJA1343-21|BIOUG65669-E11|BOLD:ACA3148  
 Sciaridae|GMPJA3240-21|BIOUG65689-A10|BOLD:ACA3148  
 Sciaridae|GMPJA1317-21|BIOUG65669-C09|BOLD:ACA3148  
 Sciaridae|GMPJA3448-21|BIOUG65691-C04|BOLD:ACA3148  
 Sciaridae|GMPJA1768-21|BIOUG65674-A09|BOLD:ACA3148  
 Sciaridae|GMPJA3484-21|BIOUG65691-F04|BOLD:ACA3148  
 Sciaridae|GMPJA2462-21|BIOUG65681-D02|BOLD:ACA3148  
 Sciaridae|GMPJA3478-21|BIOUG65691-E10|BOLD:ACA3148  
 Sciaridae|GMPJA3055-21|BIOUG65687-B03|BOLD:ACA3148  
 Sciaridae|GMPJA3234-21|BIOUG65689-A04|BOLD:ACA3148  
 Sciaridae|GMPJA3554-21|BIOUG65692-D03|BOLD:ACA3148

Sciaridae|GMPJA3052-21|BIOUG65687-B03|BOLD:ACA3148  
Sciaridae|GMPJA3234-21|BIOUG65689-A04|BOLD:ACA3148  
Sciaridae|GMPJA3554-21|BIOUG65692-D03|BOLD:ACA3148  
Sciaridae|GMPJA2189-21|BIOUG65678-E02|BOLD:ACA3148  
Sciaridae|GMPJA3458-21|BIOUG65691-D02|BOLD:ACA3148  
Sciaridae|GMPJA3483-21|BIOUG65691-F03|BOLD:ACA3148  
Sciaridae|GMPJA1923-21|BIOUG65675-F09|BOLD:ACA3148  
Sciaridae|GMPJA2067-21|BIOUG65677-B11|BOLD:ACA3148  
Sciaridae|GMPJA3339-21|BIOUG65690-B02|BOLD:ACA3148  
Sciaridae|GMPJA3506-21|BIOUG65691-H02|BOLD:ACA3148  
Sciaridae|GMPJA3578-21|BIOUG65692-F03|BOLD:ACA3148  
Sciaridae|GMPJA2178-21|BIOUG65678-D03|BOLD:ACA3148  
Sciaridae|GMPJA1363-21|BIOUG65669-G07|BOLD:ACA3148  
Sciaridae|GMPJA1640-21|BIOUG65672-F11|BOLD:ACA3148  
Sciaridae|GMPJA1978-21|BIOUG65676-C05|BOLD:ACA3148  
Sciaridae|GMPJA2480-21|BIOUG65681-E08|BOLD:ACA3148  
Sciaridae|GMPJA3261-21|BIOUG65689-C07|BOLD:ACA3148  
Sciaridae|GMPJA3637-21|BIOUG65693-C03|BOLD:ACA3148  
Sciaridae|GMPJA1321-21|BIOUG65669-D01|BOLD:ACA3148  
Sciaridae|GMPJA1431-21|BIOUG65670-E04|BOLD:ACA3148  
Sciaridae|GMPJA2474-21|BIOUG65681-E02|BOLD:ACA3148  
Sciaridae|GMPJA2487-21|BIOUG65681-F03|BOLD:ACA3148  
Sciaridae|GMPJA2490-21|BIOUG65681-F06|BOLD:ACA3148  
Sciaridae|GMPJA2508-21|BIOUG65681-G12|BOLD:ACA3148  
Sciaridae|GMPJA2516-21|BIOUG65681-H08|BOLD:ACA3148  
Sciaridae|GMPJA2759-21|BIOUG65684-E02|BOLD:ACA3148  
Sciaridae|GMPJA2761-21|BIOUG65684-E04|BOLD:ACA3148  
Sciaridae|GMPJA2762-21|BIOUG65684-E05|BOLD:ACA3148  
Sciaridae|GMPJA2768-21|BIOUG65684-E11|BOLD:ACA3148  
Sciaridae|GMPJA5275-21|BIOUG66609-E02|BOLD:ACA3148  
Sciaridae|GMPJA3197-21|BIOUG65688-F02|BOLD:ACA3148  
Sciaridae|GMPJA3027-21|BIOUG65686-G10|BOLD:ACA3148  
Sciaridae|GMPJA3502-21|BIOUG65691-G10|BOLD:ACA3148  
Sciaridae|GMPJA3286-21|BIOUG65689-E08|BOLD:ACA3148  
Sciaridae|GMPJA3312-21|BIOUG65689-G10|BOLD:ACA3148  
Sciaridae|GMPJA3141-21|BIOUG65688-A06|BOLD:ACA3148  
Sciaridae|GMPJA3321-21|BIOUG65689-H07|BOLD:ACA3148  
Sciaridae|GMPJA3427-21|BIOUG65691-A07|BOLD:ACA3148  
Sciaridae|GMPJA3394-21|BIOUG65690-F09|BOLD:ACA3148  
Sciaridae|GMPJA3419-21|BIOUG65690-H10|BOLD:ACA3148  
Sciaridae|GMPJA3430-21|BIOUG65691-A10|BOLD:ACA3148  
Sciaridae|GMPJA3019-21|BIOUG65686-G02|BOLD:ACA3148  
Sciaridae|GMPJA3024-21|BIOUG65686-G07|BOLD:ACA3148  
Sciaridae|GMPJA3026-21|BIOUG65686-G09|BOLD:ACA3148  
Sciaridae|GMPJA3028-21|BIOUG65686-G11|BOLD:ACA3148  
Sciaridae|GMPJA3050-21|BIOUG65687-A10|BOLD:ACA3148  
Sciaridae|GMPJA3056-21|BIOUG65687-B04|BOLD:ACA3148  
Sciaridae|GMPJA3064-21|BIOUG65687-B12|BOLD:ACA3148  
Sciaridae|GMPJA3130-21|BIOUG65687-H06|BOLD:ACA3148  
Sciaridae|GMPJA3241-21|BIOUG65689-A11|BOLD:ACA3148  
Sciaridae|GMPJA3245-21|BIOUG65689-B03|BOLD:ACA3148  
Sciaridae|GMPJA3253-21|BIOUG65689-B11|BOLD:ACA3148  
Sciaridae|GMPJA3332-21|BIOUG65690-A07|BOLD:ACA3148  
Sciaridae|GMPJA3351-21|BIOUG65690-C02|BOLD:ACA3148  
Sciaridae|GMPJA3475-21|BIOUG65691-E07|BOLD:ACA3148  
Sciaridae|GMPJA3488-21|BIOUG65691-F08|BOLD:ACA3148  
Sciaridae|GMPJA3496-21|BIOUG65691-G04|BOLD:ACA3148  
Sciaridae|GMPJA3511-21|BIOUG65691-H07|BOLD:ACA3148  
Sciaridae|GMPJA4302-21|BIOUG65700-C03|BOLD:ACA3148  
Sciaridae|GMPJA3518-21|BIOUG65692-A03|BOLD:ACA3148  
Sciaridae|GMPJA3534-21|BIOUG65692-B07|BOLD:ACA3148  
Sciaridae|GMPJA3536-21|BIOUG65692-B09|BOLD:ACA3148  
Sciaridae|GMPJA3537-21|BIOUG65692-B10|BOLD:ACA3148  
Sciaridae|GMPJA3542-21|BIOUG65692-C03|BOLD:ACA3148  
Sciaridae|GMPJA3580-21|BIOUG65692-F05|BOLD:ACA3148  
Sciaridae|GMPJA3583-21|BIOUG65692-F08|BOLD:ACA3148  
Sciaridae|GMPJA3592-21|BIOUG65692-G05|BOLD:ACA3148  
Sciaridae|GMPJA3604-21|BIOUG65692-H05|BOLD:ACA3148  
Sciaridae|GMPJA3612-21|BIOUG65693-A02|BOLD:ACA3148  
Sciaridae|GMPJA3618-21|BIOUG65693-A08|BOLD:ACA3148  
Sciaridae|GMPJA3630-21|BIOUG65693-B08|BOLD:ACA3148  
Sciaridae|GMPJA3631-21|BIOUG65693-B09|BOLD:ACA3148  
Sciaridae|GMPJA3929-21|BIOUG65696-C10|BOLD:ACA3148  
Sciaridae|GMPJA4024-21|BIOUG65697-C10|BOLD:ACA3148  
Sciaridae|GMPJA4033-21|BIOUG65697-D07|BOLD:ACA3148  
Sciaridae|GMPJA4176-21|BIOUG65698-H07|BOLD:ACA3148  
Sciaridae|GMPJA942-21|BIOUG65665-D02|BOLD:ACA3148  
Sciaridae|GMPJA1288-21|BIOUG65669-A04|BOLD:ACA3148  
Sciaridae|GMPJA1289-21|BIOUG65669-A05|BOLD:ACA3148  
Sciaridae|GMPJA1294-21|BIOUG65669-A10|BOLD:ACA3148  
Sciaridae|GMPJA1322-21|BIOUG65669-D02|BOLD:ACA3148  
Sciaridae|GMPJA1326-21|BIOUG65669-D06|BOLD:ACA3148  
Sciaridae|GMPJA1331-21|BIOUG65669-D11|BOLD:ACA3148  
Sciaridae|GMPJA1063-21|BIOUG65666-F04|BOLD:ACA3148  
Sciaridae|GMPJA1090-21|BIOUG65666-H07|BOLD:ACA3148  
Sciaridae|GMPJA1102-21|BIOUG65667-A08|BOLD:ACA3148  
Sciaridae|GMPJA1174-21|BIOUG65667-G08|BOLD:ACA3148  
Sciaridae|GMPJA1334-21|BIOUG65669-E02|BOLD:ACA3148  
Sciaridae|GMPJA1340-21|BIOUG65669-E08|BOLD:ACA3148  
Sciaridae|GMPJA1342-21|BIOUG65669-E10|BOLD:ACA3148  
Sciaridae|GMPJA1354-21|BIOUG65669-F10|BOLD:ACA3148  
Sciaridae|GMPJA1389-21|BIOUG65670-A10|BOLD:ACA3148  
Sciaridae|GMPJA1400-21|BIOUG65670-B09|BOLD:ACA3148  
Sciaridae|GMPJA1412-21|BIOUG65670-C09|BOLD:ACA3148  
Sciaridae|GMPJA1797-21|BIOUG65674-D02|BOLD:ACA3148  
Sciaridae|GMPJA1806-21|BIOUG65674-D11|BOLD:ACA3148  
Sciaridae|GMPJA1810-21|BIOUG65674-E03|BOLD:ACA3148  
Sciaridae|GMPJA1830-21|BIOUG65674-F11|BOLD:ACA3148  
Sciaridae|GMPJA1837-21|BIOUG65674-G06|BOLD:ACA3148  
Sciaridae|GMPJA1844-21|BIOUG65674-H01|BOLD:ACA3148  
Sciaridae|GMPJA1845-21|BIOUG65674-H02|BOLD:ACA3148  
Sciaridae|GMPJA1852-21|BIOUG65674-H09|BOLD:ACA3148  
Sciaridae|GMPJA1860-21|BIOUG65675-A06|BOLD:ACA3148



Sciaridae|GMPJA1845-21|BIOUG65674-H02|BOLD:ACA3148  
 Sciaridae|GMPJA1852-21|BIOUG65674-H09|BOLD:ACA3148  
 Sciaridae|GMPJA1860-21|BIOUG65675-A06|BOLD:ACA3148  
 Sciaridae|GMPJA1894-21|BIOUG65675-D04|BOLD:ACA3148  
 Sciaridae|GMPJA1905-21|BIOUG65675-E03|BOLD:ACA3148  
 Sciaridae|GMPJA1906-21|BIOUG65675-E04|BOLD:ACA3148  
 Sciaridae|GMPJA1930-21|BIOUG65675-G04|BOLD:ACA3148  
 Sciaridae|GMPJA1430-21|BIOUG65670-E03|BOLD:ACA3148  
 Sciaridae|GMPJA1466-21|BIOUG65670-H03|BOLD:ACA3148  
 Sciaridae|GMPJA1473-21|BIOUG65670-H10|BOLD:ACA3148  
 Sciaridae|GMPJA1479-21|BIOUG65671-A05|BOLD:ACA3148  
 Sciaridae|GMPJA1497-21|BIOUG65671-B11|BOLD:ACA3148  
 Sciaridae|GMPJA1503-21|BIOUG65671-C05|BOLD:ACA3148  
 Sciaridae|GMPJA1534-21|BIOUG65671-E12|BOLD:ACA3148  
 Sciaridae|GMPJA1545-21|BIOUG65671-F11|BOLD:ACA3148  
 Sciaridae|GMPJA1554-21|BIOUG65671-G08|BOLD:ACA3148  
 Sciaridae|GMPJA1571-21|BIOUG65672-A02|BOLD:ACA3148  
 Sciaridae|GMPJA1586-21|BIOUG65672-B05|BOLD:ACA3148  
 Sciaridae|GMPJA1588-21|BIOUG65672-B07|BOLD:ACA3148  
 Sciaridae|GMPJA1598-21|BIOUG65672-C05|BOLD:ACA3148  
 Sciaridae|GMPJA1607-21|BIOUG65672-D02|BOLD:ACA3148  
 Sciaridae|GMPJA1615-21|BIOUG65672-D10|BOLD:ACA3148  
 Sciaridae|GMPJA1637-21|BIOUG65672-F08|BOLD:ACA3148  
 Sciaridae|GMPJA1638-21|BIOUG65672-F09|BOLD:ACA3148  
 Sciaridae|GMPJA1650-21|BIOUG65672-G09|BOLD:ACA3148  
 Sciaridae|GMPJA2168-21|BIOUG65678-C05|BOLD:ACA3148  
 Sciaridae|GMPJA2177-21|BIOUG65678-D02|BOLD:ACA3148  
 Sciaridae|GMPJA2188-21|BIOUG65678-E01|BOLD:ACA3148  
 Sciaridae|GMPJA2191-21|BIOUG65678-E04|BOLD:ACA3148  
 Sciaridae|GMPJA2208-21|BIOUG65678-F09|BOLD:ACA3148  
 Sciaridae|GMPJA2215-21|BIOUG65678-G04|BOLD:ACA3148  
 Sciaridae|GMPJA2242-21|BIOUG65679-A08|BOLD:ACA3148  
 Sciaridae|GMPJA2243-21|BIOUG65679-A09|BOLD:ACA3148  
 Sciaridae|GMPJA2245-21|BIOUG65679-A11|BOLD:ACA3148  
 Sciaridae|GMPJA2254-21|BIOUG65679-B08|BOLD:ACA3148  
 Sciaridae|GMPJA2273-21|BIOUG65679-D03|BOLD:ACA3148  
 Sciaridae|GMPJA2293-21|BIOUG65679-E11|BOLD:ACA3148  
 Sciaridae|GMPJA2315-21|BIOUG65679-G09|BOLD:ACA3148  
 Sciaridae|GMPJA2322-21|BIOUG65679-H04|BOLD:ACA3148  
 Sciaridae|GMPJA2351-21|BIOUG65680-B10|BOLD:ACA3148  
 Sciaridae|GMPJA2361-21|BIOUG65680-C08|BOLD:ACA3148  
 Sciaridae|GMPJA1666-21|BIOUG65673-A02|BOLD:ACA3148  
 Sciaridae|GMPJA1683-21|BIOUG65673-B07|BOLD:ACA3148  
 Sciaridae|GMPJA1684-21|BIOUG65673-B08|BOLD:ACA3148  
 Sciaridae|GMPJA1687-21|BIOUG65673-B11|BOLD:ACA3148  
 Sciaridae|GMPJA1705-21|BIOUG65673-D05|BOLD:ACA3148  
 Sciaridae|GMPJA1715-21|BIOUG65673-E03|BOLD:ACA3148  
 Sciaridae|GMPJA1716-21|BIOUG65673-E04|BOLD:ACA3148  
 Sciaridae|GMPJA1717-21|BIOUG65673-E05|BOLD:ACA3148  
 Sciaridae|GMPJA1729-21|BIOUG65673-F05|BOLD:ACA3148  
 Sciaridae|GMPJA1743-21|BIOUG65673-G07|BOLD:ACA3148  
 Sciaridae|GMPJA1745-21|BIOUG65673-G09|BOLD:ACA3148  
 Sciaridae|GMPJA1750-21|BIOUG65673-H02|BOLD:ACA3148  
 Sciaridae|GMPJA1752-21|BIOUG65673-H04|BOLD:ACA3148  
 Sciaridae|GMPJA1764-21|BIOUG65674-A05|BOLD:ACA3148  
 Sciaridae|GMPJA1941-21|BIOUG65675-H03|BOLD:ACA3148  
 Sciaridae|GMPJA1964-21|BIOUG65676-B03|BOLD:ACA3148  
 Sciaridae|GMPJA1981-21|BIOUG65676-C08|BOLD:ACA3148  
 Sciaridae|GMPJA1982-21|BIOUG65676-C09|BOLD:ACA3148  
 Sciaridae|GMPJA1988-21|BIOUG65676-D03|BOLD:ACA3148  
 Sciaridae|GMPJA1989-21|BIOUG65676-D04|BOLD:ACA3148  
 Sciaridae|GMPJA1992-21|BIOUG65676-D07|BOLD:ACA3148  
 Sciaridae|GMPJA1994-21|BIOUG65676-D09|BOLD:ACA3148  
 Sciaridae|GMPJA2000-21|BIOUG65676-E03|BOLD:ACA3148  
 Sciaridae|GMPJA2033-21|BIOUG65676-G12|BOLD:ACA3148  
 Sciaridae|GMPJA2035-21|BIOUG65676-H02|BOLD:ACA3148  
 Sciaridae|GMPJA2036-21|BIOUG65676-H03|BOLD:ACA3148  
 Sciaridae|GMPJA2046-21|BIOUG65677-A02|BOLD:ACA3148  
 Sciaridae|GMPJA2070-21|BIOUG65677-C02|BOLD:ACA3148  
 Sciaridae|GMPJA2071-21|BIOUG65677-C03|BOLD:ACA3148  
 Sciaridae|GMPJA2099-21|BIOUG65677-E07|BOLD:ACA3148  
 Sciaridae|GMPJA2107-21|BIOUG65677-F03|BOLD:ACA3148  
 Sciaridae|GMPJA2112-21|BIOUG65677-F08|BOLD:ACA3148  
 Sciaridae|GMPJA2134-21|BIOUG65677-H06|BOLD:ACA3148  
 Sciaridae|GMPJA2141-21|BIOUG65678-A02|BOLD:ACA3148  
 Sciaridae|GMPJA2147-21|BIOUG65678-A08|BOLD:ACA3148  
 Sciaridae|GMPJA2148-21|BIOUG65678-A09|BOLD:ACA3148  
 Sciaridae|GMPJA2152-21|BIOUG65678-B01|BOLD:ACA3148  
 Sciaridae|GMPJA2160-21|BIOUG65678-B09|BOLD:ACA3148  
 Sciaridae|GMPJA2411-21|BIOUG65680-G10|BOLD:ACA3148  
 Sciaridae|GMPJA2418-21|BIOUG65680-H05|BOLD:ACA3148  
 Sciaridae|GMPJA3275-21|BIOUG65689-D09|BOLD:ACA3148  
 Sciaridae|GMPJA1361-21|BIOUG65669-G05|BOLD:ACA3148  
 Sciaridae|GMPJA1900-21|BIOUG65675-D10|BOLD:ACA3148  
 Sciaridae|GMPJA2332-21|BIOUG65680-A03|BOLD:ACA3148  
 Sciaridae|GMPJA1940-21|BIOUG65675-H02|BOLD:ACA3148  
 Sciaridae|GMPJA2084-21|BIOUG65677-D04|BOLD:ACA3148  
 Sciaridae|GMPJA3555-21|BIOUG65692-D04|BOLD:ACA3148  
 Sciaridae|GMPJA2384-21|BIOUG65680-E07|BOLD:ACA3148  
 Sciaridae|GMPJA4191-21|BIOUG65699-A11|BOLD:ACA3148  
 Sciaridae|GMPJA4414-21|BIOUG66601-D08|BOLD:ACA3148  
 Sciaridae|GMPJA3087-21|BIOUG65687-D11|BOLD:ACA3148  
 Sciaridae|GMPJA2447-21|BIOUG65681-B11|BOLD:ACA3148  
 Sciaridae|GMPJA2443-21|BIOUG65681-B07|BOLD:ACA3148  
 Sciaridae|GMPJA2426-21|BIOUG65681-A02|BOLD:ACA3148  
 Cecidomyiidae|GMPJA723-21|BIOUG65663-A09|BOLD:ABW5482  
 Cecidomyiidae|GMPJA682-21|BIOUG65662-F03|BOLD:ABW5482  
 Cecidomyiidae|GMPJA503-21|BIOUG65660-G02|BOLD:AEJ1491  
 Oligota parva|GMPJA8834-21|BIOUG66646-H10|BOLD:AAP9955  
 Cecidomyiidae|GMPJA10082-21|BIOUG66659-F02|BOLD:AEJ8146  
 Cecidomyiidae|GMPJA8436-21|BIOUG66642-G04|BOLD:AEJ8146  
 Cecidomyiidae|GMPJA7899-21|BIOUG66637-B02|BOLD:AEJ8146  
 Cecidomyiidae|GMPJA7616-21|BIOUG66634-B04|BOLD:AEJ8146

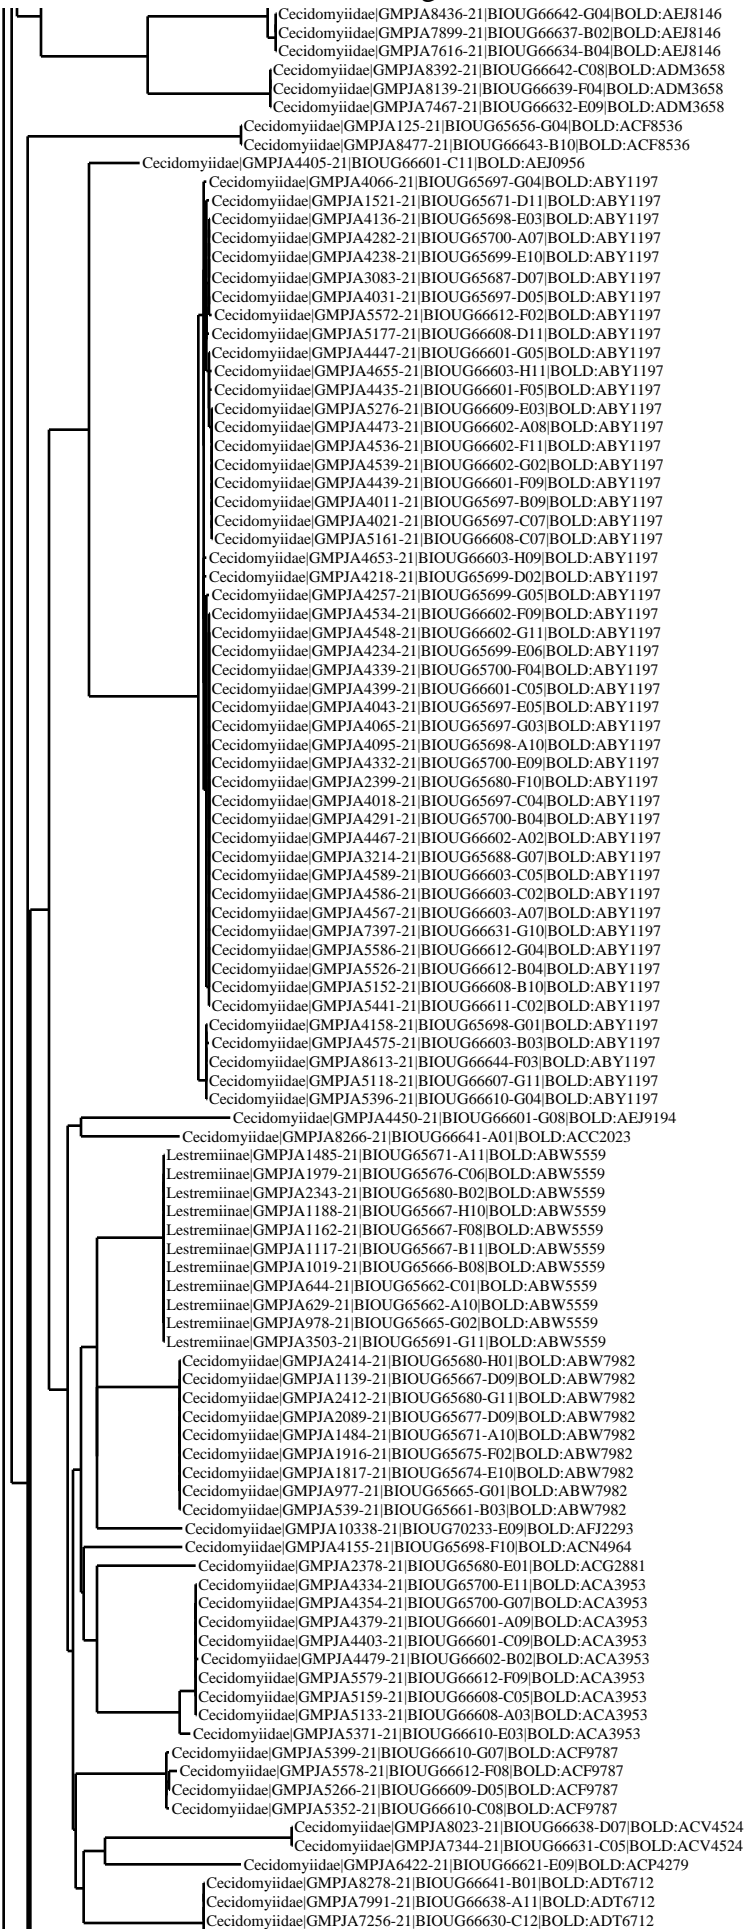

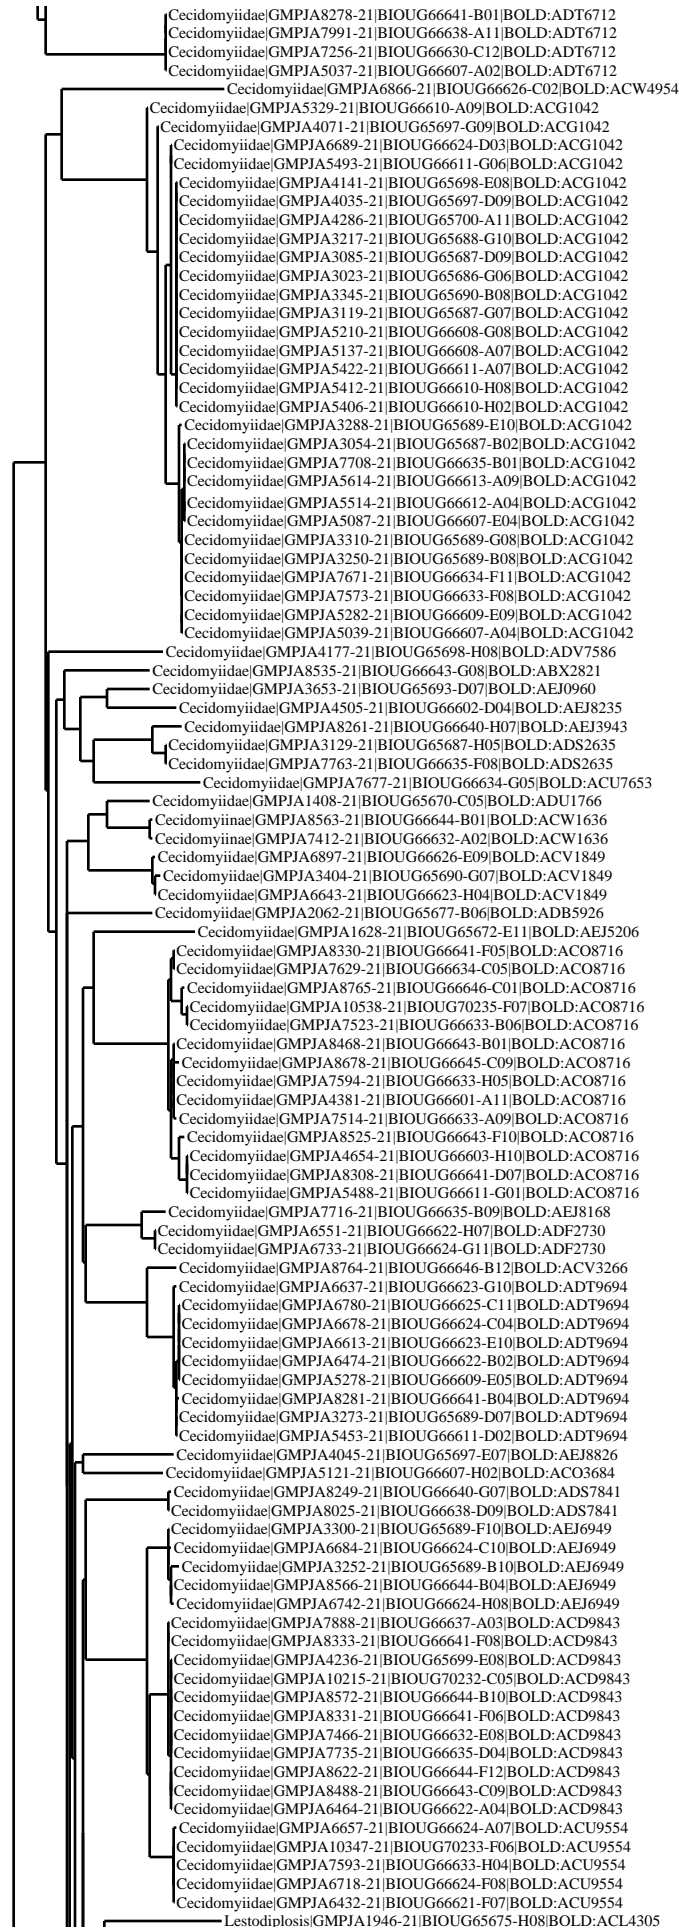

Cecidomyiidae|GMPJA6718-21|BIOUG66624-F08|BOLD:ACU9554  
 Cecidomyiidae|GMPJA6432-21|BIOUG66621-F07|BOLD:ACU9554  
 Lestodiplosis|GMPJA1946-21|BIOUG65675-H08|BOLD:ACL4305  
 Cecidomyiidae|GMPJA7955-21|BIOUG66637-F10|BOLD:ADT6838  
 Cecidomyiidae|GMPJA3413-21|BIOUG65690-H04|BOLD:ADT6838  
 Cecidomyiidae|GMPJA7956-21|BIOUG66637-F11|BOLD:ADT6838  
 Cecidomyiidae|GMPJA7773-21|BIOUG66635-G06|BOLD:ADT6838  
 Cecidomyiidae|GMPJA6899-21|BIOUG66626-E11|BOLD:ADT6838  
 Cecidomyiidae|GMPJA7394-21|BIOUG66631-G07|BOLD:ADT6838  
 Cecidomyiidae|GMPJA4132-21|BIOUG65698-D11|BOLD:ACV1486  
 Cecidomyiidae|GMPJA7748-21|BIOUG66635-E05|BOLD:ACV1486  
 Cecidomyiidae|GMPJA7982-21|BIOUG66638-A02|BOLD:ACV1486  
 Cecidomyiidae|GMPJA6573-21|BIOUG66623-B06|BOLD:ACV1486  
 Cecidomyiidae|GMPJA7236-21|BIOUG66630-B04|BOLD:ACV0899  
 Cecidomyiidae|GMPJA8014-21|BIOUG66638-C10|BOLD:ADD3712  
 Cecidomyiidae|GMPJA6631-21|BIOUG66623-G04|BOLD:ADD3712  
 Cecidomyiidae|GMPJA3202-21|BIOUG65688-F07|BOLD:AEJ2376  
 Cecidomyiidae|GMPJA7377-21|BIOUG66631-F02|BOLD:AEJ2376  
 Cecidomyiidae|GMPJA5257-21|BIOUG66609-C08|BOLD:AEJ2376  
 Cecidomyiidae|GMPJA8727-21|BIOUG66645-G10|BOLD:ABY0773  
 Cecidomyiidae|GMPJA8571-21|BIOUG66644-B09|BOLD:ABY0773  
 Cecidomyiidae|GMPJA8590-21|BIOUG66644-D04|BOLD:ABY0773  
 Cecidomyiidae|GMPJA8090-21|BIOUG66639-B03|BOLD:ABY0773  
 Cecidomyiidae|GMPJA7493-21|BIOUG66632-G11|BOLD:ABY0773  
 Cecidomyiidae|GMPJA5373-21|BIOUG66610-E05|BOLD:ABY0773  
 Cecidomyiidae|GMPJA8644-21|BIOUG66644-H10|BOLD:AEJ8588  
 Cecidomyiidae|GMPJA7572-21|BIOUG66633-F07|BOLD:AEJ4655  
 Contarinia|GMPJA7544-21|BIOUG66633-D03|BOLD:ADV5906  
 Cecidomyiidae|GMPJA7472-21|BIOUG66632-F02|BOLD:ACO3556  
 Cecidomyiidae|GMPJA1437-21|BIOUG65670-E10|BOLD:AEJ1982  
 Cecidomyiidae|GMPJA8768-21|BIOUG66646-C04|BOLD:AEJ1982  
 Cecidomyiidae|GMPJA8533-21|BIOUG66643-G06|BOLD:AEJ1982  
 Cecidomyiidae|GMPJA8360-21|BIOUG66641-H11|BOLD:AEJ1982  
 Cecidomyiidae|GMPJA8343-21|BIOUG66641-G06|BOLD:AEJ1982  
 Cecidomyiidae|GMPJA8311-21|BIOUG66641-D10|BOLD:AEJ1982  
 Cecidomyiidae|GMPJA7821-21|BIOUG66636-C07|BOLD:AEJ1982  
 Cecidomyiidae|GMPJA7531-21|BIOUG66633-C02|BOLD:AEJ1982  
 Cecidomyiidae|GMPJA7009-21|BIOUG66627-G02|BOLD:AEK9995  
 Cecidomyiidae|GMPJA8161-21|BIOUG66639-H02|BOLD:AEJ8693  
 Cecidomyiidae|GMPJA6629-21|BIOUG66623-G02|BOLD:AEJ8693  
 Cecidomyiidae|GMPJA7915-21|BIOUG66637-C06|BOLD:AEK0624  
 Cecidomyiidae|GMPJA7943-21|BIOUG66637-E10|BOLD:ACW8058  
 Cecidomyiidae|GMPJA7976-21|BIOUG66637-H07|BOLD:AFI9978  
 Asteromyia|GMPJA7569-21|BIOUG66633-F04|BOLD:AEJ3762  
 Asteromyia|GMPJA7715-21|BIOUG66635-B08|BOLD:AEJ3762  
 Asteromyia|GMPJA7366-21|BIOUG66631-E03|BOLD:AEJ3762  
 Asteromyia|GMPJA7712-21|BIOUG66635-B05|BOLD:AEJ3762  
 Asteromyia|GMPJA8357-21|BIOUG66641-H08|BOLD:AEJ3762  
 Asteromyia|GMPJA8305-21|BIOUG66641-D04|BOLD:AEJ3762  
 Asteromyia|GMPJA8247-21|BIOUG66640-G05|BOLD:AEJ3762  
 Asteromyia|GMPJA8352-21|BIOUG66641-H03|BOLD:AEJ3762  
 Asteromyia|GMPJA7658-21|BIOUG66634-E10|BOLD:AEJ3762  
 Asteromyia|GMPJA7560-21|BIOUG66633-E07|BOLD:AEJ3762  
 Asteromyia|GMPJA7700-21|BIOUG66635-A05|BOLD:AEJ3762  
 Asteromyia|GMPJA6819-21|BIOUG66625-G02|BOLD:AEJ3762  
 Asteromyia|GMPJA8304-21|BIOUG66641-D03|BOLD:AEJ3762  
 Asteromyia|GMPJA7923-21|BIOUG66637-D02|BOLD:AEJ3762  
 Asteromyia|GMPJA8716-21|BIOUG66645-F11|BOLD:AEJ3762  
 Asteromyia|GMPJA8686-21|BIOUG66645-D05|BOLD:AEJ3762  
 Asteromyia|GMPJA8335-21|BIOUG66641-F10|BOLD:AEJ3762  
 Asteromyia|GMPJA7622-21|BIOUG66634-B10|BOLD:AEJ3762  
 Asteromyia|GMPJA7468-21|BIOUG66632-E10|BOLD:AEJ3762  
 Asteromyia|GMPJA7728-21|BIOUG66635-C09|BOLD:AEJ3762  
 Asteromyia|GMPJA7726-21|BIOUG66635-C07|BOLD:AEJ3762  
 Asteromyia|GMPJA6393-21|BIOUG66621-C04|BOLD:AEJ3762  
 Asteromyia|GMPJA8810-21|BIOUG66646-F10|BOLD:AEJ3762  
 Asteromyia|GMPJA8786-21|BIOUG66646-D10|BOLD:AEJ3762  
 Asteromyia|GMPJA6727-21|BIOUG66624-G05|BOLD:AEJ3762  
 Cecidomyiidae|GMPJA8368-21|BIOUG66642-A08|BOLD:ADU6974  
 Cecidomyiidae|GMPJA7687-21|BIOUG66634-H03|BOLD:ACV1118  
 Cecidomyiidae|GMPJA8272-21|BIOUG66641-A07|BOLD:ACV1118  
 Cecidomyiidae|GMPJA7439-21|BIOUG66632-C05|BOLD:ACV1118  
 Cecidomyiidae|GMPJA5295-21|BIOUG66609-F10|BOLD:ADV4458  
 Cecidomyiidae|GMPJA4206-21|BIOUG65699-C02|BOLD:AEI9970  
 Cecidomyiidae|GMPJA8279-21|BIOUG66641-B02|BOLD:AEJ9465  
 Cecidomyiidae|GMPJA7961-21|BIOUG66637-G04|BOLD:AEJ0381  
 Cecidomyiidae|GMPJA8534-21|BIOUG66643-G07|BOLD:ABX9039  
 Cecidomyiidae|GMPJA7488-21|BIOUG66632-G06|BOLD:ABX9039  
 Cecidomyiidae|GMPJA7695-21|BIOUG66634-H11|BOLD:ABX9039  
 Feltiella acarissuga|GMPJA10012-21|BIOUG66658-H03|BOLD:ACD4170  
 Cecidomyiidae|GMPJA8747-21|BIOUG66646-A07|BOLD:ACV4328  
 Cecidomyiidae|GMPJA8556-21|BIOUG66644-A06|BOLD:ACW2344  
 Cecidomyiidae|GMPJA7513-21|BIOUG66633-A08|BOLD:ACW2344  
 Cecidomyiidae|GMPJA7710-21|BIOUG66635-B03|BOLD:ACW2344  
 Cecidomyiidae|GMPJA8387-21|BIOUG66642-C03|BOLD:ADC0779  
 Cecidomyiidae|GMPJA4088-21|BIOUG65698-A03|BOLD:AEA2972  
 Cecidomyiidae|GMPJA2229-21|BIOUG65678-H06|BOLD:AEA2972  
 Cecidomyiidae|GMPJA5571-21|BIOUG66612-F01|BOLD:AEA2972  
 Cecidomyiidae|GMPJA8700-21|BIOUG66645-E07|BOLD:ACX8580  
 Cecidomyiidae|GMPJA4249-21|BIOUG65699-F09|BOLD:AEJ5806  
 Cecidomyiidae|GMPJA8623-21|BIOUG66644-G01|BOLD:AEJ5806  
 Cecidomyiidae|GMPJA5294-21|BIOUG66609-F09|BOLD:AEJ5806  
 Cecidomyiidae|GMPJA7478-21|BIOUG66632-F08|BOLD:ACW1443  
 Cecidomyiidae|GMPJA8340-21|BIOUG66641-G03|BOLD:AEK0588  
 Cecidomyiidae|GMPJA7557-21|BIOUG66633-E04|BOLD:ADU1953  
 Cecidomyiidae|GMPJA8561-21|BIOUG66644-A11|BOLD:ADU1953  
 Cecidomyiidae|GMPJA8341-21|BIOUG66641-G04|BOLD:ADU1953  
 Cecidomyiidae|GMPJA7271-21|BIOUG66630-E03|BOLD:ADU1953  
 Cecidomyiidae|GMPJA6878-21|BIOUG66626-D02|BOLD:ADU1953  
 Cecidomyiidae|GMPJA6667-21|BIOUG66624-B05|BOLD:ADS9543  
 Cecidomyiidae|GMPJA8554-21|BIOUG66644-A04|BOLD:ACW8980  
 Cecidomyiidae|GMPJA8329-21|BIOUG66641-F04|BOLD:ACW8980  
 Cecidomyiidae|GMPJA6879-21|BIOUG66626-D03|BOLD:ACW8980

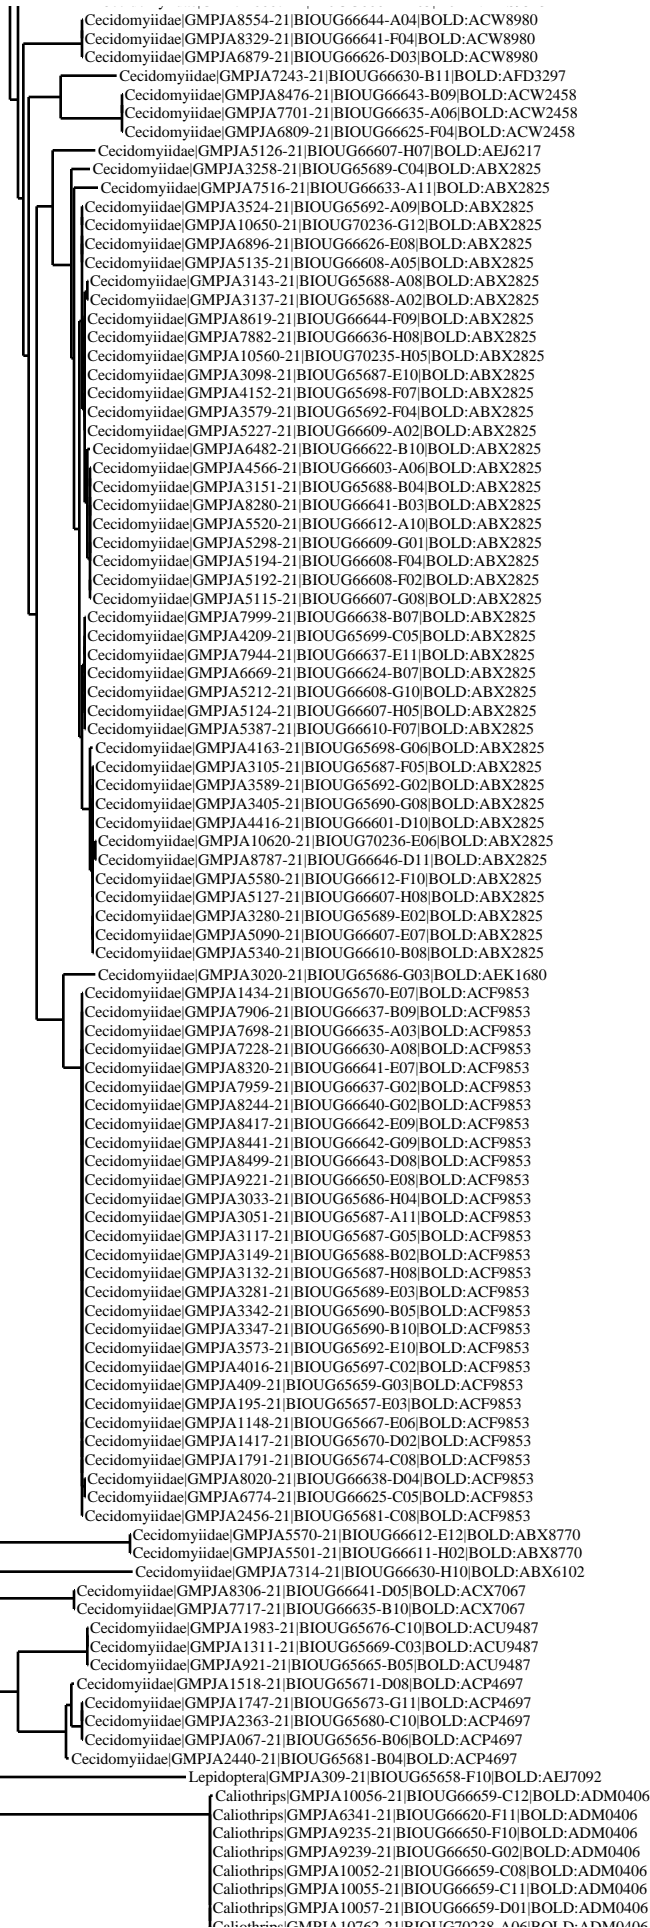

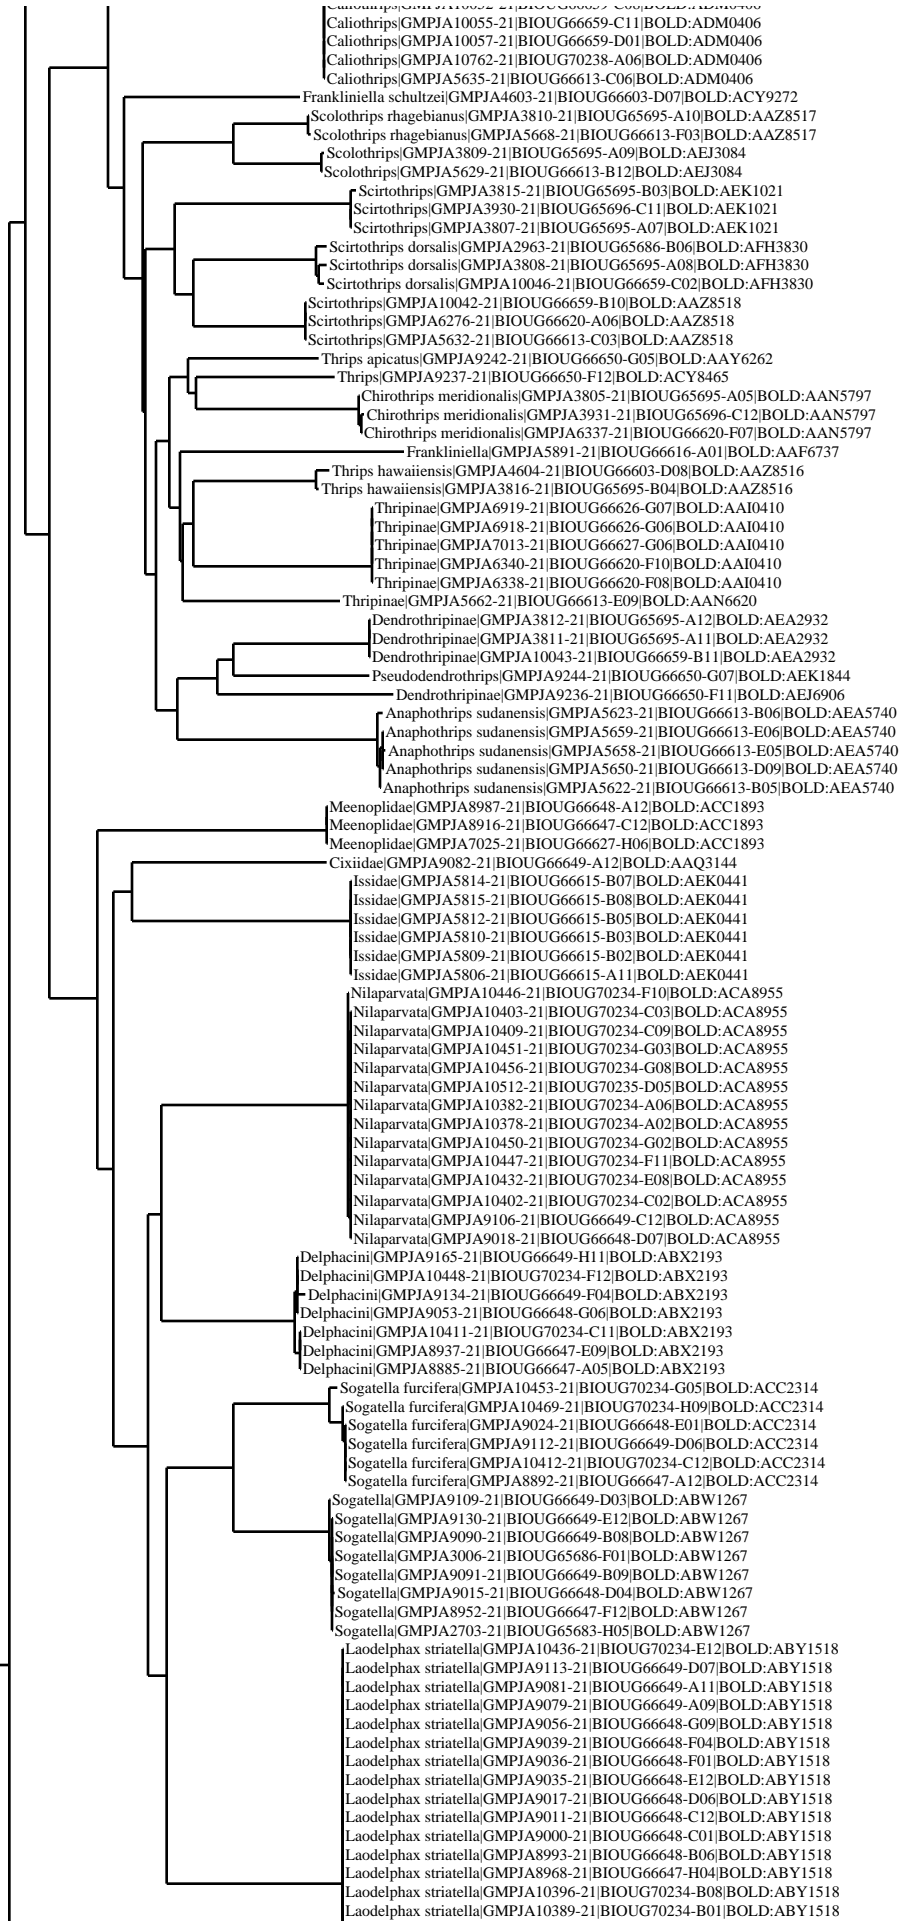

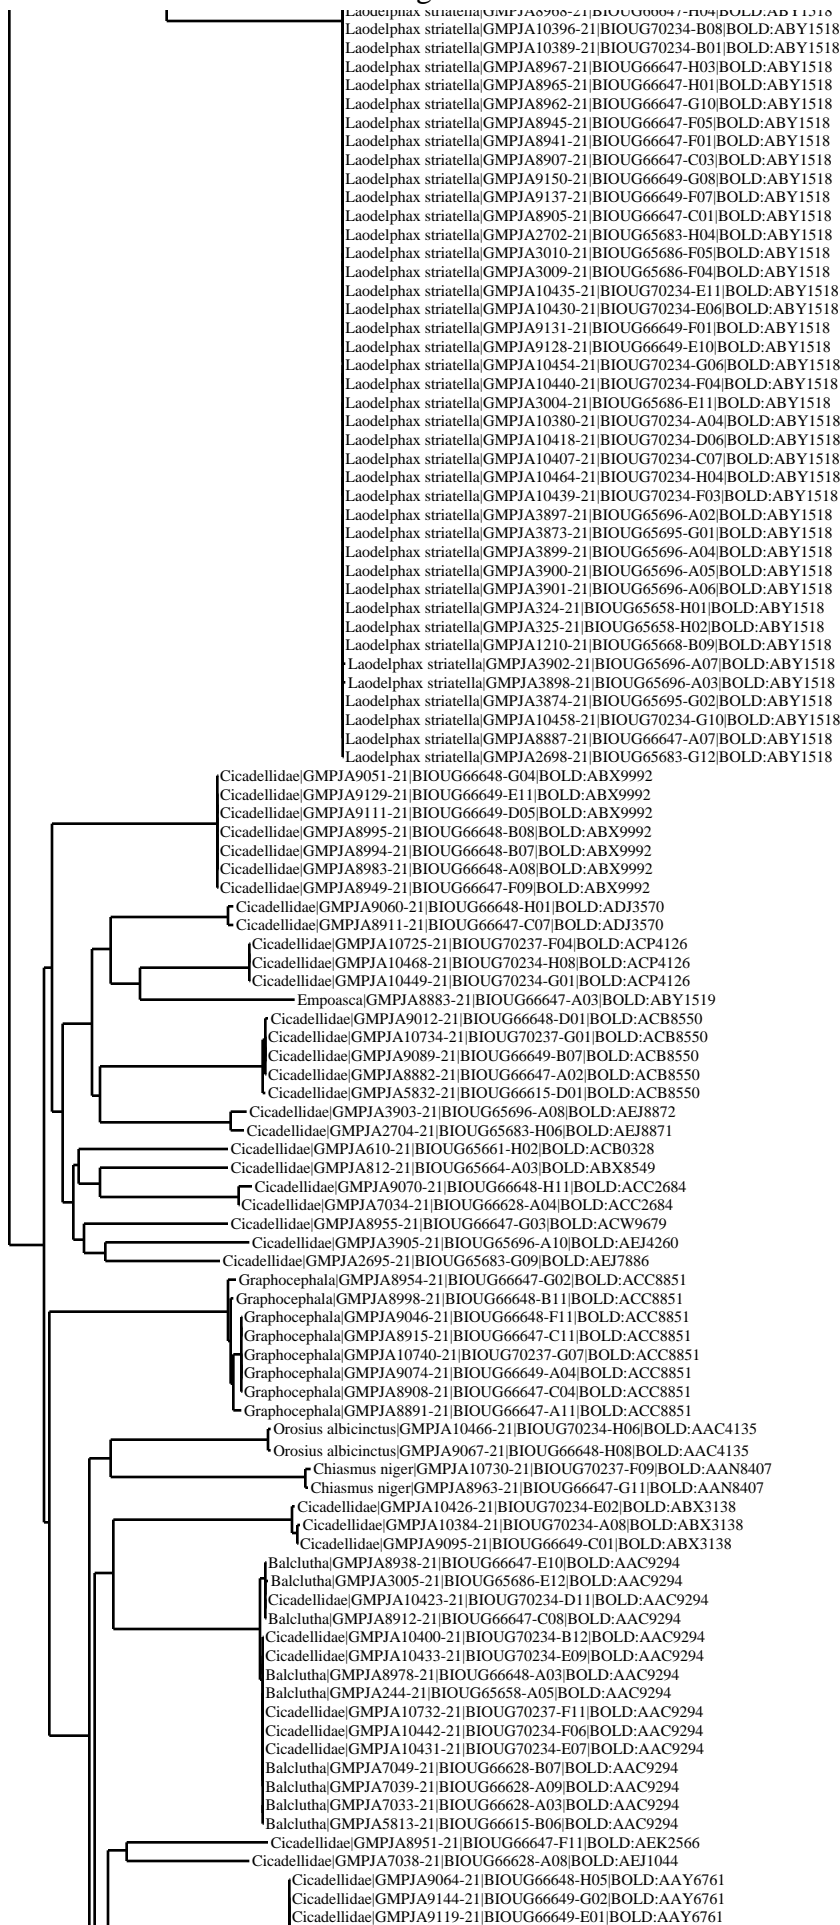

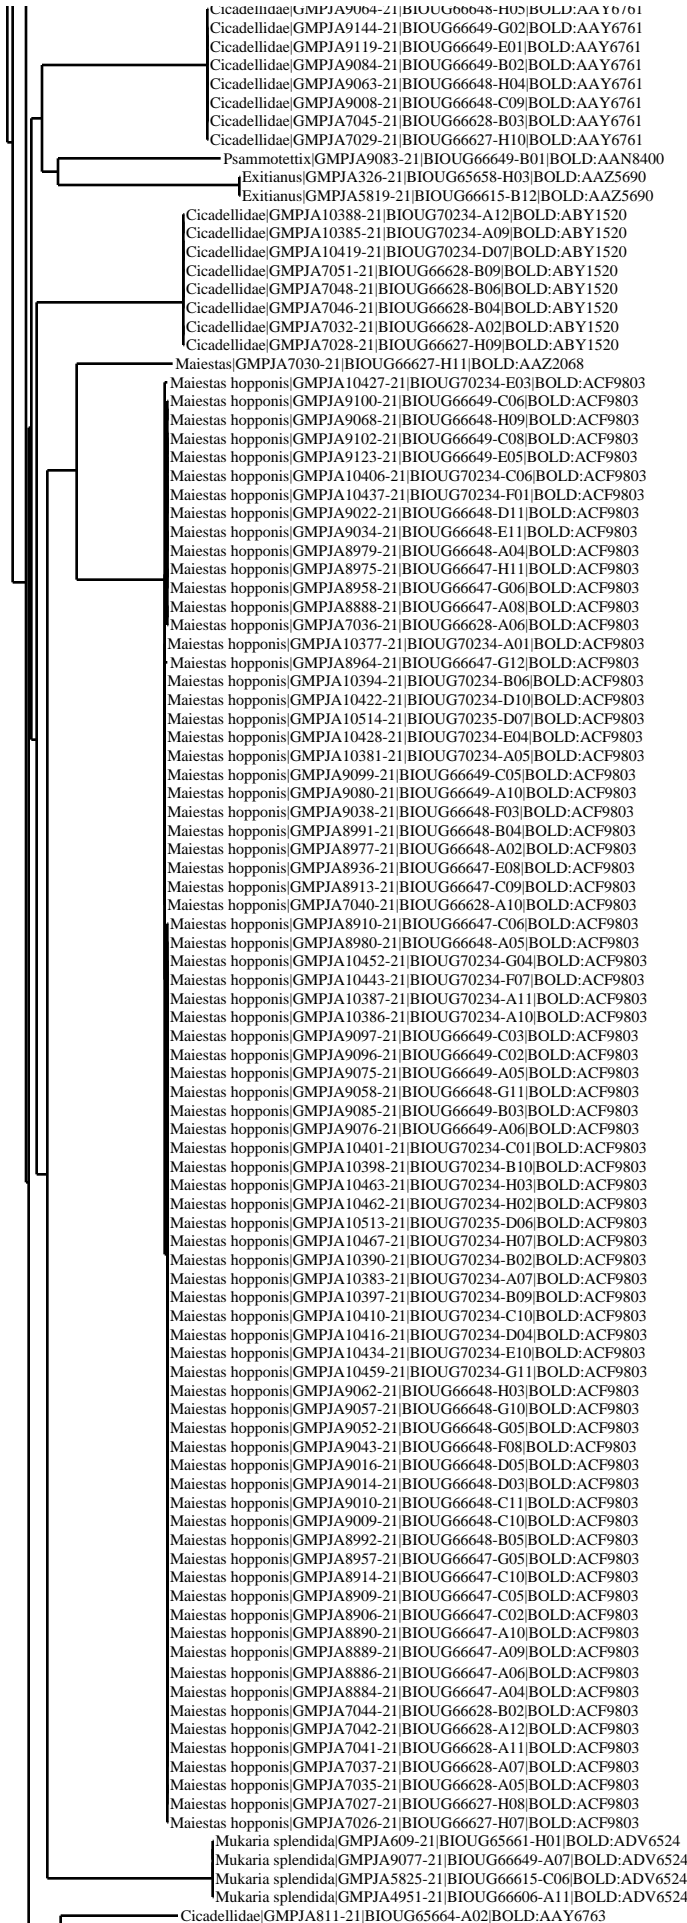



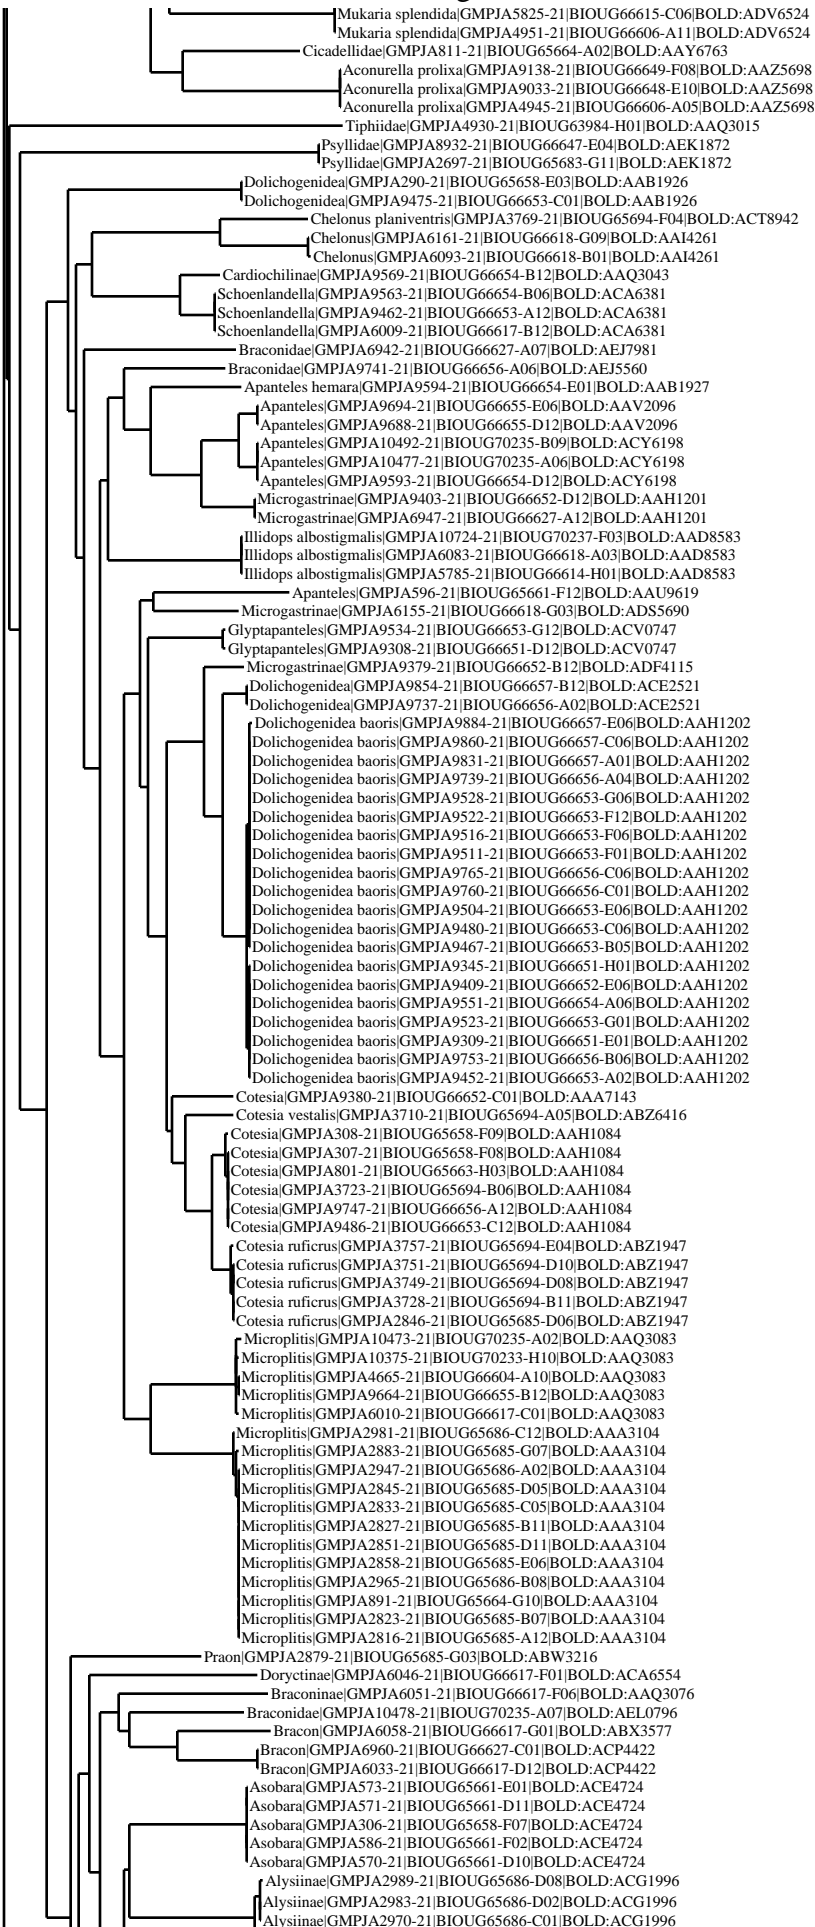

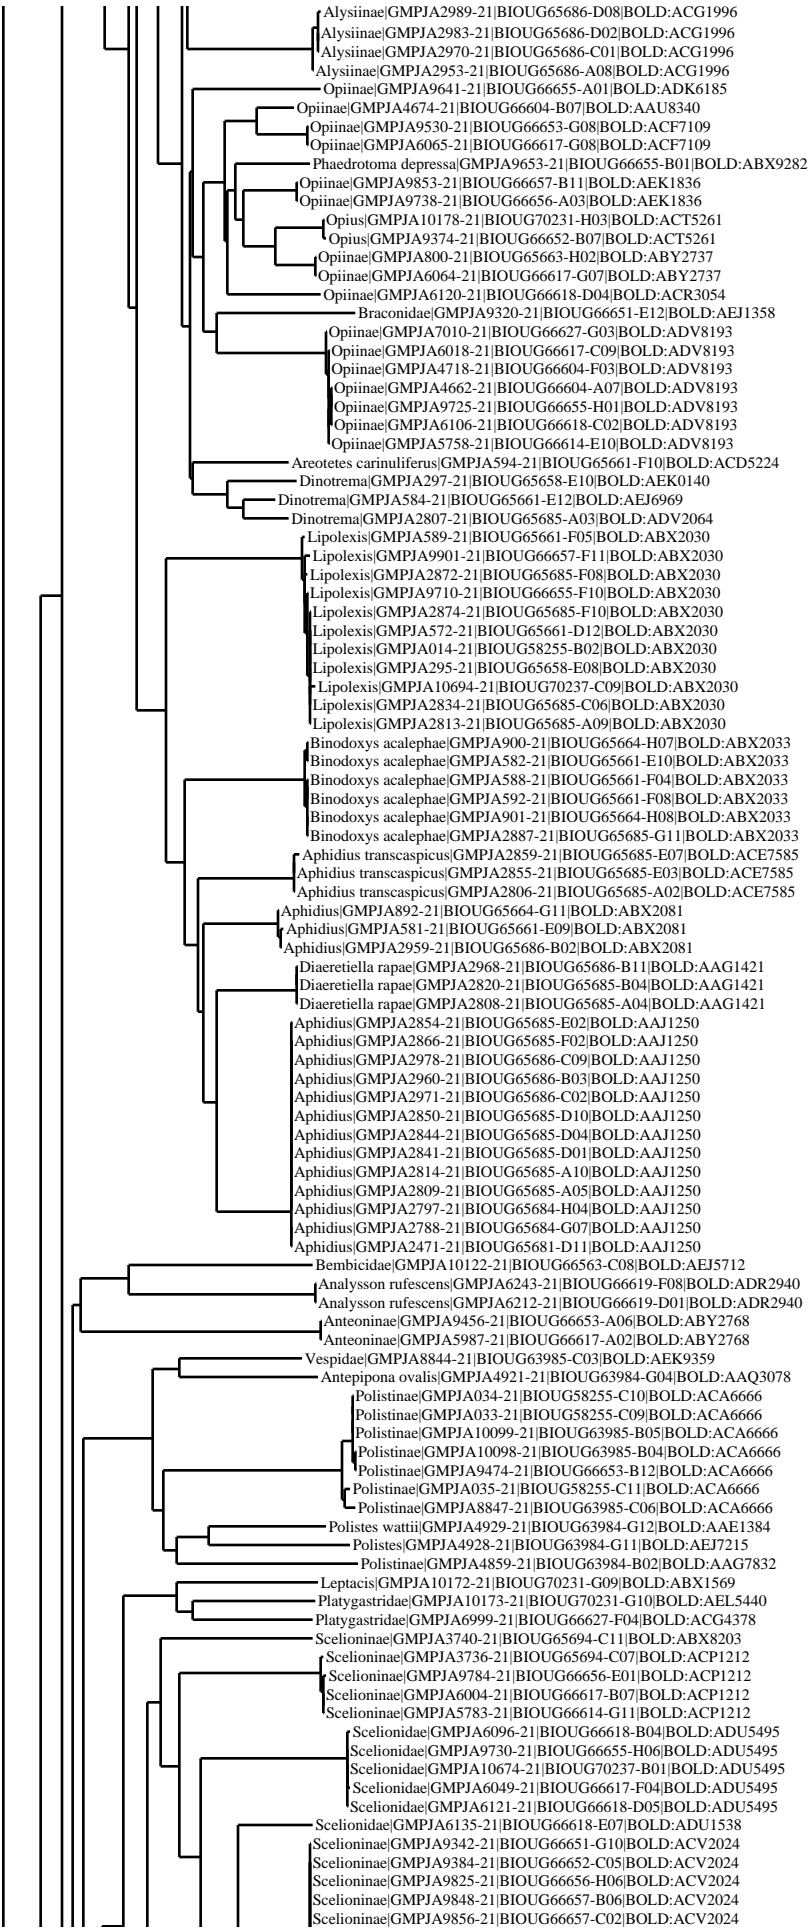

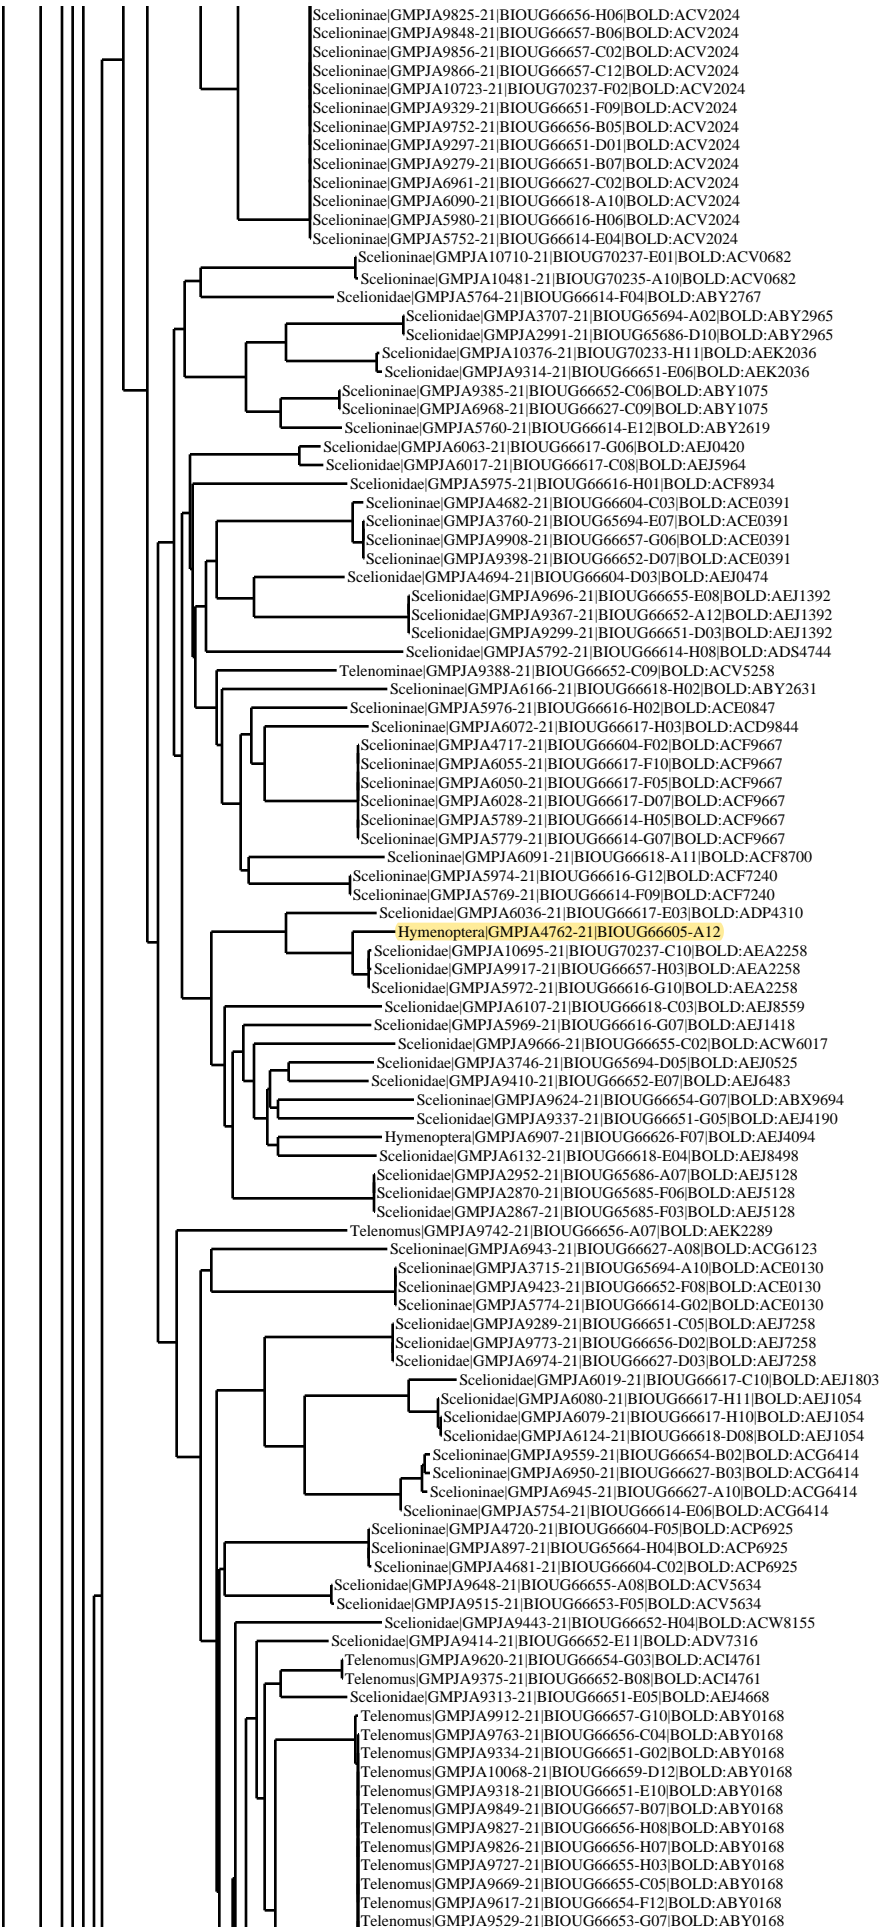

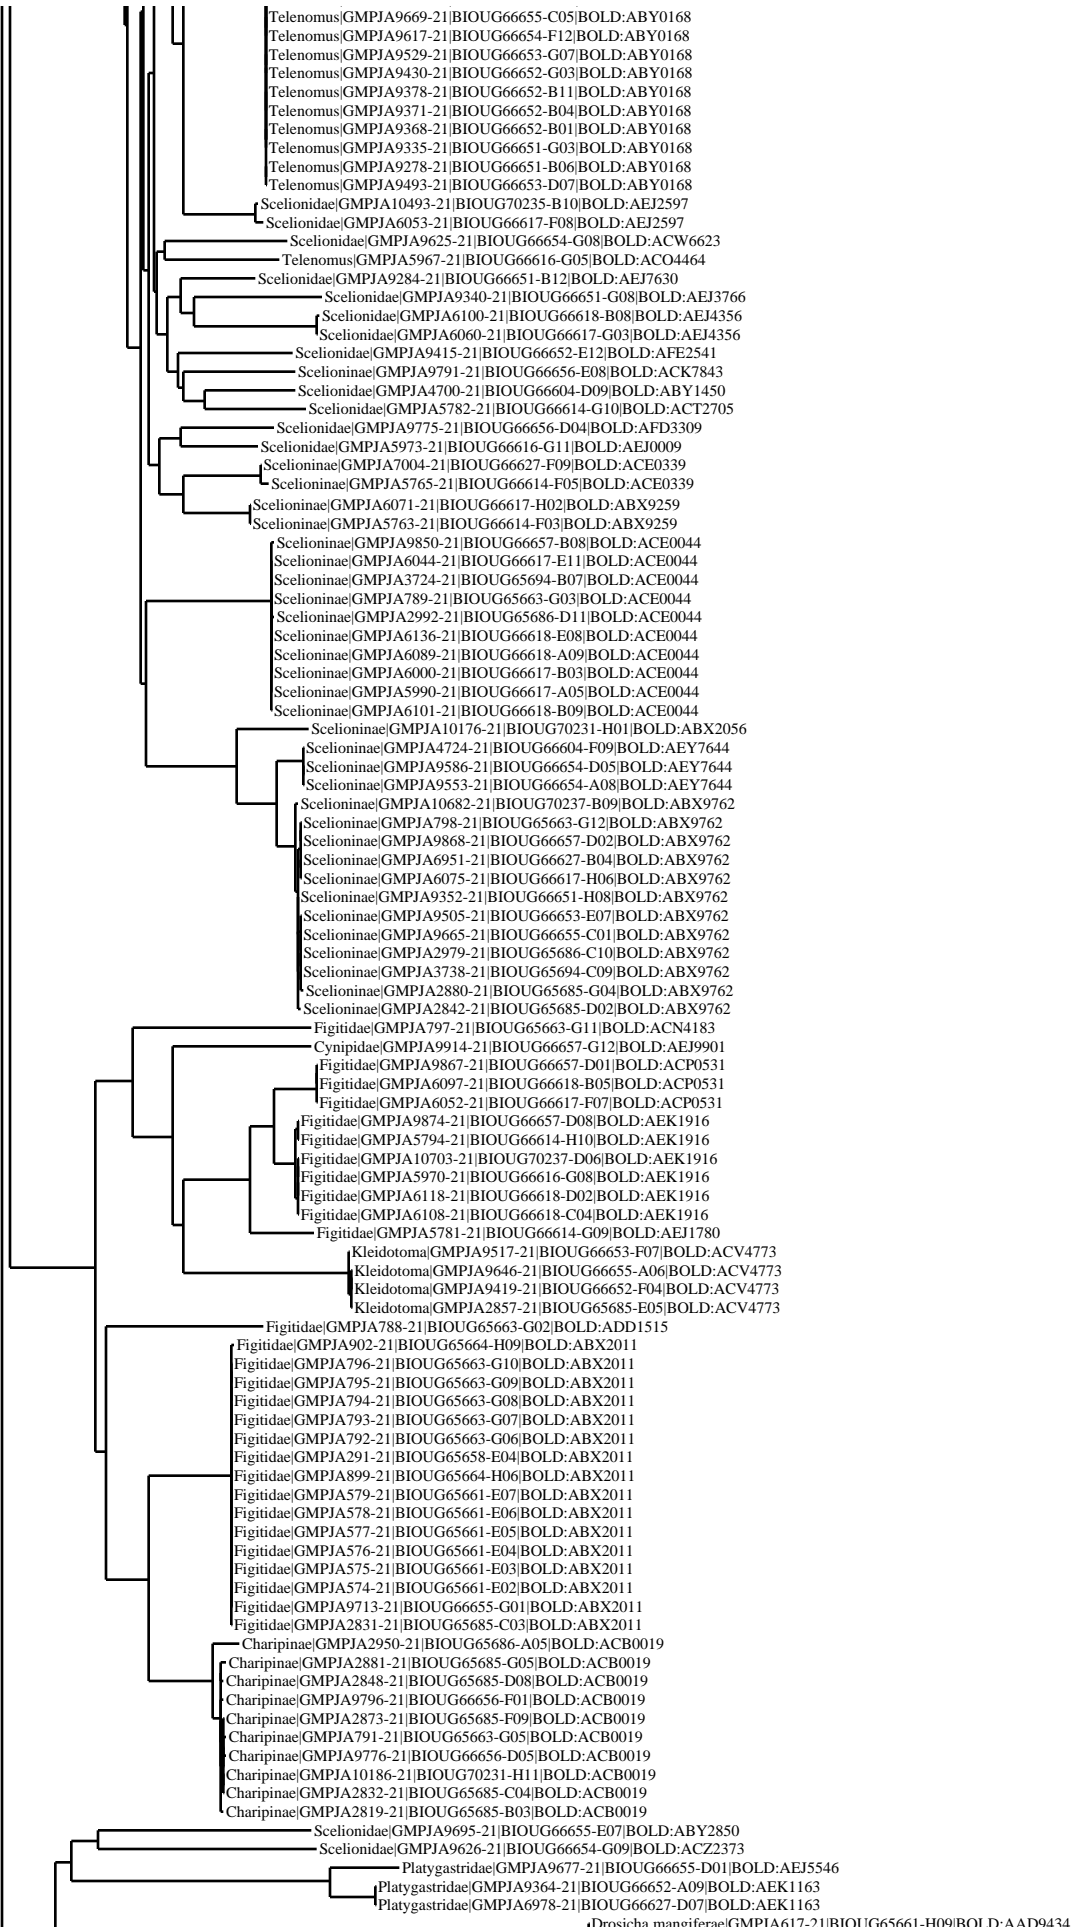

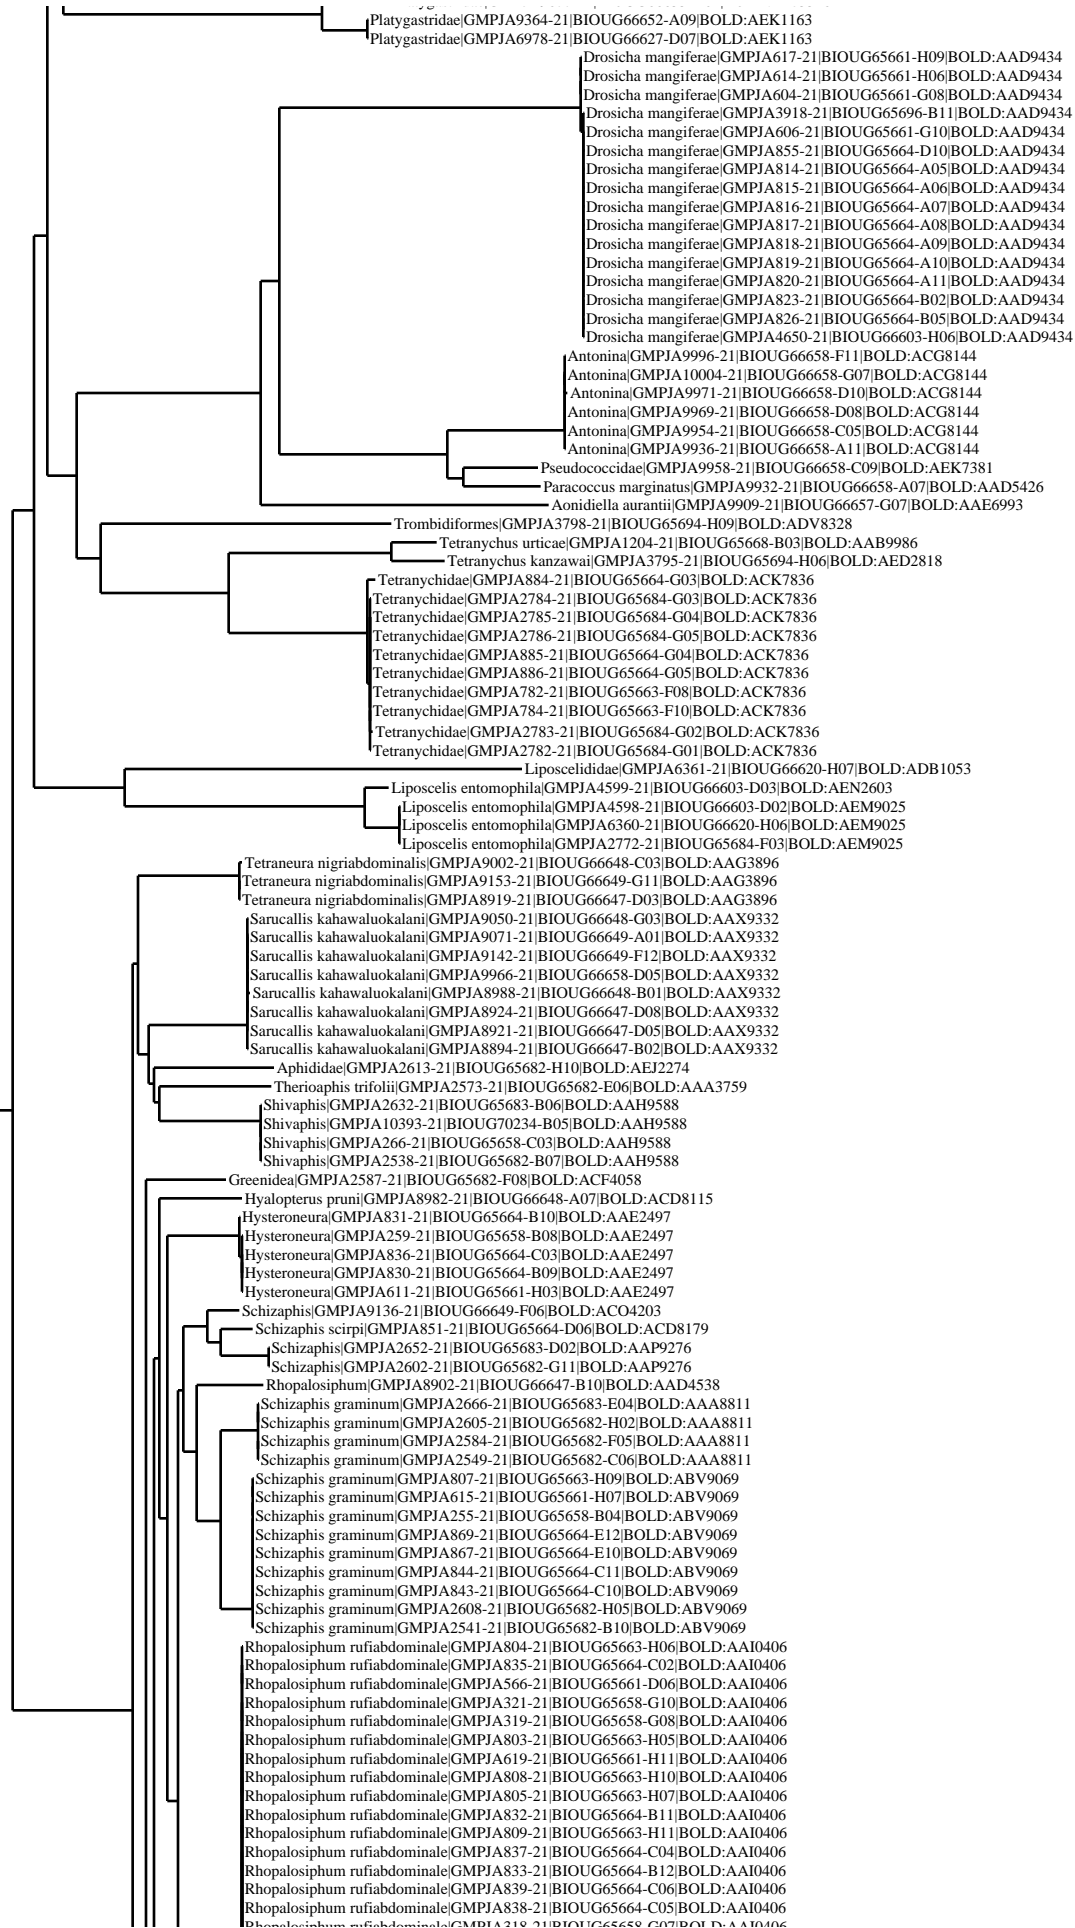

Rhopalosiphum rufiabdominale|GMPJA839-21|BIOUG65664-C06|BOLD:AAI0406  
Rhopalosiphum rufiabdominale|GMPJA838-21|BIOUG65664-C05|BOLD:AAI0406  
Rhopalosiphum rufiabdominale|GMPJA318-21|BIOUG65658-G07|BOLD:AAI0406  
Rhopalosiphum rufiabdominale|GMPJA316-21|BIOUG65658-G05|BOLD:AAI0406  
Rhopalosiphum rufiabdominale|GMPJA265-21|BIOUG65658-C02|BOLD:AAI0406  
Rhopalosiphum rufiabdominale|GMPJA842-21|BIOUG65664-C09|BOLD:AAI0406  
Rhopalosiphum rufiabdominale|GMPJA569-21|BIOUG65661-D09|BOLD:AAI0406  
Rhopalosiphum rufiabdominale|GMPJA608-21|BIOUG65661-G12|BOLD:AAI0406  
Rhopalosiphum rufiabdominale|GMPJA605-21|BIOUG65661-G09|BOLD:AAI0406  
Rhopalosiphum rufiabdominale|GMPJA602-21|BIOUG65661-G06|BOLD:AAI0406  
Rhopalosiphum rufiabdominale|GMPJA9162-21|BIOUG66649-H08|BOLD:AAI0406  
Rhopalosiphum rufiabdominale|GMPJA9159-21|BIOUG66649-H05|BOLD:AAI0406  
Rhopalosiphum rufiabdominale|GMPJA9121-21|BIOUG66649-E03|BOLD:AAI0406  
Rhopalosiphum rufiabdominale|GMPJA9020-21|BIOUG66648-D09|BOLD:AAI0406  
Rhopalosiphum rufiabdominale|GMPJA616-21|BIOUG65661-H08|BOLD:AAI0406  
Rhopalosiphum rufiabdominale|GMPJA329-21|BIOUG65658-H06|BOLD:AAI0406  
Rhopalosiphum rufiabdominale|GMPJA8942-21|BIOUG66647-F02|BOLD:AAI0406  
Rhopalosiphum rufiabdominale|GMPJA9069-21|BIOUG66648-H10|BOLD:AAI0406  
Rhopalosiphum rufiabdominale|GMPJA9148-21|BIOUG66649-G06|BOLD:AAI0406  
Rhopalosiphum rufiabdominale|GMPJA9045-21|BIOUG66648-F10|BOLD:AAI0406  
Rhopalosiphum rufiabdominale|GMPJA9005-21|BIOUG66648-C06|BOLD:AAI0406  
Rhopalosiphum rufiabdominale|GMPJA8985-21|BIOUG66648-A10|BOLD:AAI0406  
Rhopalosiphum rufiabdominale|GMPJA8971-21|BIOUG66647-H07|BOLD:AAI0406  
Rhopalosiphum rufiabdominale|GMPJA8904-21|BIOUG66647-B12|BOLD:AAI0406  
Rhopalosiphum padi|GMPJA2631-21|BIOUG65683-B05|BOLD:ACF2924  
Rhopalosiphum padi|GMPJA864-21|BIOUG65664-E07|BOLD:ACF2924  
Rhopalosiphum padi|GMPJA2634-21|BIOUG65683-B08|BOLD:ACF2924  
Rhopalosiphum padi|GMPJA2589-21|BIOUG65682-F10|BOLD:ACF2924  
Rhopalosiphum padi|GMPJA2578-21|BIOUG65682-E11|BOLD:ACF2924  
Rhopalosiphum padi|GMPJA841-21|BIOUG65664-C08|BOLD:ACF2924  
Rhopalosiphum padi|GMPJA2648-21|BIOUG65683-C10|BOLD:ACF2924  
Rhopalosiphum padi|GMPJA2653-21|BIOUG65683-D03|BOLD:ACF2924  
Rhopalosiphum padi|GMPJA2663-21|BIOUG65683-E01|BOLD:ACF2924  
Rhopalosiphum padi|GMPJA2667-21|BIOUG65683-E05|BOLD:ACF2924  
Rhopalosiphum padi|GMPJA2690-21|BIOUG65683-G04|BOLD:ACF2924  
Rhopalosiphum padi|GMPJA2692-21|BIOUG65683-G06|BOLD:ACF2924  
Rhopalosiphum padi|GMPJA848-21|BIOUG65664-D03|BOLD:ACF2924  
Rhopalosiphum padi|GMPJA834-21|BIOUG65664-C01|BOLD:ACF2924  
Rhopalosiphum padi|GMPJA3001-21|BIOUG65686-E08|BOLD:ACF2924  
Rhopalosiphum padi|GMPJA2639-21|BIOUG65683-C01|BOLD:ACF2924  
Rhopalosiphum padi|GMPJA2626-21|BIOUG65683-A12|BOLD:ACF2924  
Rhopalosiphum padi|GMPJA2623-21|BIOUG65683-A09|BOLD:ACF2924  
Rhopalosiphum padi|GMPJA2622-21|BIOUG65683-A08|BOLD:ACF2924  
Rhopalosiphum padi|GMPJA2619-21|BIOUG65683-A05|BOLD:ACF2924  
Rhopalosiphum padi|GMPJA2618-21|BIOUG65683-A04|BOLD:ACF2924  
Rhopalosiphum padi|GMPJA2617-21|BIOUG65683-A03|BOLD:ACF2924  
Rhopalosiphum padi|GMPJA2610-21|BIOUG65682-H07|BOLD:ACF2924  
Rhopalosiphum padi|GMPJA2609-21|BIOUG65682-H06|BOLD:ACF2924  
Rhopalosiphum padi|GMPJA2607-21|BIOUG65682-H04|BOLD:ACF2924  
Rhopalosiphum padi|GMPJA2579-21|BIOUG65682-E12|BOLD:ACF2924  
Rhopalosiphum padi|GMPJA2572-21|BIOUG65682-E05|BOLD:ACF2924  
Rhopalosiphum padi|GMPJA2565-21|BIOUG65682-D10|BOLD:ACF2924  
Rhopalosiphum padi|GMPJA2554-21|BIOUG65682-C11|BOLD:ACF2924  
Rhopalosiphum padi|GMPJA2606-21|BIOUG65682-H03|BOLD:AAA9899  
Rhopalosiphum padi|GMPJA2551-21|BIOUG65682-C08|BOLD:AAA9899  
Rhopalosiphum padi|GMPJA852-21|BIOUG65664-D07|BOLD:AAA9899  
Rhopalosiphum padi|GMPJA2528-21|BIOUG65682-A09|BOLD:AAA9899  
Rhopalosiphum padi|GMPJA2526-21|BIOUG65682-A07|BOLD:AAA9899  
Rhopalosiphum padi|GMPJA2527-21|BIOUG65682-A08|BOLD:AAA9899  
Rhopalosiphum padi|GMPJA2530-21|BIOUG65682-A11|BOLD:AAA9899  
Rhopalosiphum padi|GMPJA2531-21|BIOUG65682-A12|BOLD:AAA9899  
Rhopalosiphum padi|GMPJA2535-21|BIOUG65682-B04|BOLD:AAA9899  
Rhopalosiphum padi|GMPJA2536-21|BIOUG65682-B05|BOLD:AAA9899  
Rhopalosiphum padi|GMPJA2537-21|BIOUG65682-B06|BOLD:AAA9899  
Rhopalosiphum padi|GMPJA2539-21|BIOUG65682-B08|BOLD:AAA9899  
Rhopalosiphum padi|GMPJA2547-21|BIOUG65682-C04|BOLD:AAA9899  
Rhopalosiphum padi|GMPJA2550-21|BIOUG65682-C07|BOLD:AAA9899  
Rhopalosiphum padi|GMPJA2553-21|BIOUG65682-C10|BOLD:AAA9899  
Rhopalosiphum padi|GMPJA2555-21|BIOUG65682-C12|BOLD:AAA9899  
Rhopalosiphum padi|GMPJA2556-21|BIOUG65682-D01|BOLD:AAA9899  
Rhopalosiphum padi|GMPJA2557-21|BIOUG65682-D02|BOLD:AAA9899  
Rhopalosiphum padi|GMPJA2558-21|BIOUG65682-D03|BOLD:AAA9899  
Rhopalosiphum padi|GMPJA2560-21|BIOUG65682-D05|BOLD:AAA9899  
Rhopalosiphum padi|GMPJA2562-21|BIOUG65682-D07|BOLD:AAA9899  
Rhopalosiphum padi|GMPJA2563-21|BIOUG65682-D08|BOLD:AAA9899  
Rhopalosiphum padi|GMPJA2564-21|BIOUG65682-D09|BOLD:AAA9899  
Rhopalosiphum padi|GMPJA2567-21|BIOUG65682-D12|BOLD:AAA9899  
Rhopalosiphum padi|GMPJA2574-21|BIOUG65682-E07|BOLD:AAA9899  
Rhopalosiphum padi|GMPJA2575-21|BIOUG65682-E08|BOLD:AAA9899  
Rhopalosiphum padi|GMPJA2577-21|BIOUG65682-E10|BOLD:AAA9899  
Rhopalosiphum padi|GMPJA2580-21|BIOUG65682-F01|BOLD:AAA9899  
Rhopalosiphum padi|GMPJA2581-21|BIOUG65682-F02|BOLD:AAA9899  
Rhopalosiphum padi|GMPJA2583-21|BIOUG65682-F04|BOLD:AAA9899  
Rhopalosiphum padi|GMPJA2590-21|BIOUG65682-F11|BOLD:AAA9899  
Rhopalosiphum padi|GMPJA2591-21|BIOUG65682-F12|BOLD:AAA9899  
Rhopalosiphum padi|GMPJA2594-21|BIOUG65682-G03|BOLD:AAA9899  
Rhopalosiphum padi|GMPJA2595-21|BIOUG65682-G04|BOLD:AAA9899  
Rhopalosiphum padi|GMPJA2620-21|BIOUG65683-A06|BOLD:AAA9899  
Rhopalosiphum padi|GMPJA2621-21|BIOUG65683-A07|BOLD:AAA9899  
Rhopalosiphum padi|GMPJA2624-21|BIOUG65683-A10|BOLD:AAA9899  
Rhopalosiphum padi|GMPJA2625-21|BIOUG65683-A11|BOLD:AAA9899  
Rhopalosiphum padi|GMPJA2628-21|BIOUG65683-B02|BOLD:AAA9899  
Rhopalosiphum padi|GMPJA2633-21|BIOUG65683-B07|BOLD:AAA9899  
Rhopalosiphum padi|GMPJA2635-21|BIOUG65683-B09|BOLD:AAA9899  
Rhopalosiphum padi|GMPJA2641-21|BIOUG65683-C03|BOLD:AAA9899  
Rhopalosiphum padi|GMPJA2642-21|BIOUG65683-C04|BOLD:AAA9899  
Rhopalosiphum padi|GMPJA2643-21|BIOUG65683-C05|BOLD:AAA9899  
Rhopalosiphum padi|GMPJA2644-21|BIOUG65683-C06|BOLD:AAA9899  
Rhopalosiphum padi|GMPJA2645-21|BIOUG65683-C07|BOLD:AAA9899  
Rhopalosiphum padi|GMPJA2649-21|BIOUG65683-C11|BOLD:AAA9899  
Rhopalosiphum padi|GMPJA2651-21|BIOUG65683-D01|BOLD:AAA9899  
Rhopalosiphum padi|GMPJA2654-21|BIOUG65683-D04|BOLD:AAA9899

Rhopalosiphum padi|GMPJA2049-21|BIOUG65683-C11|BOLD:AAA9899  
Rhopalosiphum padi|GMPJA2651-21|BIOUG65683-D01|BOLD:AAA9899  
Rhopalosiphum padi|GMPJA2654-21|BIOUG65683-D04|BOLD:AAA9899  
Rhopalosiphum padi|GMPJA2655-21|BIOUG65683-D05|BOLD:AAA9899  
Rhopalosiphum padi|GMPJA2659-21|BIOUG65683-D09|BOLD:AAA9899  
Rhopalosiphum padi|GMPJA2664-21|BIOUG65683-E02|BOLD:AAA9899  
Rhopalosiphum padi|GMPJA2668-21|BIOUG65683-E06|BOLD:AAA9899  
Rhopalosiphum padi|GMPJA2685-21|BIOUG65683-F11|BOLD:AAA9899  
Rhopalosiphum padi|GMPJA3872-21|BIOUG65695-F12|BOLD:AAA9899  
Rhopalosiphum padi|GMPJA856-21|BIOUG65664-D11|BOLD:AAA9899  
Rhopalosiphum padi|GMPJA858-21|BIOUG65664-E01|BOLD:AAA9899  
Rhopalosiphum padi|GMPJA2548-21|BIOUG65682-C05|BOLD:AAA9899  
Rhopalosiphum padi|GMPJA2660-21|BIOUG65683-D10|BOLD:AAA9899  
Rhopalosiphum padi|GMPJA2673-21|BIOUG65683-E11|BOLD:AAA9899  
Rhopalosiphum padi|GMPJA2586-21|BIOUG65682-F07|BOLD:AAA9899  
Rhopalosiphum padi|GMPJA2525-21|BIOUG65682-A06|BOLD:AAA9899  
Rhopalosiphum padi|GMPJA2524-21|BIOUG65682-A05|BOLD:AAA9899  
Rhopalosiphum padi|GMPJA2521-21|BIOUG65682-A02|BOLD:AAA9899  
Melanaphis|GMPJA8972-21|BIOUG66647-H08|BOLD:AAK7235  
Melanaphis|GMPJA8933-21|BIOUG66647-E05|BOLD:AAK7235  
Melanaphis|GMPJA8970-21|BIOUG66647-H06|BOLD:AAK7235  
Melanaphis|GMPJA9987-21|BIOUG66658-F02|BOLD:AAK7235  
Melanaphis|GMPJA8917-21|BIOUG66647-D01|BOLD:AAK7235  
Melanaphis|GMPJA9078-21|BIOUG66649-A08|BOLD:AAK7235  
Melanaphis|GMPJA9139-21|BIOUG66649-F09|BOLD:AAK7235  
Melanaphis|GMPJA9160-21|BIOUG66649-H06|BOLD:AAK7235  
Melanaphis|GMPJA9044-21|BIOUG66648-F09|BOLD:AAK7235  
Melanaphis|GMPJA7052-21|BIOUG66628-B10|BOLD:AAK7235  
Melanaphis|GMPJA8903-21|BIOUG66647-B11|BOLD:AAK7235  
Melanaphis|GMPJA8901-21|BIOUG66647-B09|BOLD:AAK7235  
Melanaphis|GMPJA8900-21|BIOUG66647-B08|BOLD:AAK7235  
Melanaphis|GMPJA8899-21|BIOUG66647-B07|BOLD:AAK7235  
Melanaphis|GMPJA8896-21|BIOUG66647-B04|BOLD:AAK7235  
Melanaphis|GMPJA8895-21|BIOUG66647-B03|BOLD:AAK7235  
Melanaphis|GMPJA8881-21|BIOUG66647-A01|BOLD:AAK7235  
Melanaphis|GMPJA7053-21|BIOUG66628-B11|BOLD:AAK7235  
Melanaphis|GMPJA9103-21|BIOUG66649-C09|BOLD:AAK7235  
Melanaphis|GMPJA9093-21|BIOUG66649-B11|BOLD:AAK7235  
Melanaphis|GMPJA9147-21|BIOUG66649-G05|BOLD:AAK7235  
Melanaphis|GMPJA9146-21|BIOUG66649-G04|BOLD:AAK7235  
Melanaphis|GMPJA9145-21|BIOUG66649-G03|BOLD:AAK7235  
Melanaphis|GMPJA9140-21|BIOUG66649-F10|BOLD:AAK7235  
Melanaphis|GMPJA9108-21|BIOUG66649-D02|BOLD:AAK7235  
Melanaphis|GMPJA9105-21|BIOUG66649-C11|BOLD:AAK7235  
Melanaphis|GMPJA9088-21|BIOUG66649-B06|BOLD:AAK7235  
Melanaphis|GMPJA9087-21|BIOUG66649-B05|BOLD:AAK7235  
Melanaphis|GMPJA9073-21|BIOUG66649-A03|BOLD:AAK7235  
Melanaphis|GMPJA9065-21|BIOUG66648-H06|BOLD:AAK7235  
Melanaphis|GMPJA9061-21|BIOUG66648-H02|BOLD:AAK7235  
Melanaphis|GMPJA9059-21|BIOUG66648-G12|BOLD:AAK7235  
Melanaphis|GMPJA9055-21|BIOUG66648-G08|BOLD:AAK7235  
Melanaphis|GMPJA9048-21|BIOUG66648-G01|BOLD:AAK7235  
Melanaphis|GMPJA9042-21|BIOUG66648-F07|BOLD:AAK7235  
Melanaphis|GMPJA9041-21|BIOUG66648-F06|BOLD:AAK7235  
Melanaphis|GMPJA9031-21|BIOUG66648-E08|BOLD:AAK7235  
Melanaphis|GMPJA9030-21|BIOUG66648-E07|BOLD:AAK7235  
Melanaphis|GMPJA9027-21|BIOUG66648-E04|BOLD:AAK7235  
Melanaphis|GMPJA9025-21|BIOUG66648-E02|BOLD:AAK7235  
Melanaphis|GMPJA9021-21|BIOUG66648-D10|BOLD:AAK7235  
Melanaphis|GMPJA9003-21|BIOUG66648-C04|BOLD:AAK7235  
Melanaphis|GMPJA9001-21|BIOUG66648-C02|BOLD:AAK7235  
Melanaphis|GMPJA8999-21|BIOUG66648-B12|BOLD:AAK7235  
Melanaphis|GMPJA8986-21|BIOUG66648-A11|BOLD:AAK7235  
Melanaphis|GMPJA8969-21|BIOUG66647-H05|BOLD:AAK7235  
Melanaphis|GMPJA8966-21|BIOUG66647-H02|BOLD:AAK7235  
Melanaphis|GMPJA8960-21|BIOUG66647-G08|BOLD:AAK7235  
Melanaphis|GMPJA8959-21|BIOUG66647-G07|BOLD:AAK7235  
Melanaphis|GMPJA8953-21|BIOUG66647-G01|BOLD:AAK7235  
Melanaphis|GMPJA8948-21|BIOUG66647-F08|BOLD:AAK7235  
Melanaphis|GMPJA8943-21|BIOUG66647-F03|BOLD:AAK7235  
Melanaphis|GMPJA9126-21|BIOUG66649-E08|BOLD:AAK7235  
Melanaphis|GMPJA9117-21|BIOUG66649-D11|BOLD:AAK7235  
Melanaphis|GMPJA9156-21|BIOUG66649-H02|BOLD:AAK7235  
Melanaphis|GMPJA9155-21|BIOUG66649-H01|BOLD:AAK7235  
Melanaphis|GMPJA9161-21|BIOUG66649-H07|BOLD:AAK7235  
Melanaphis|GMPJA9158-21|BIOUG66649-H04|BOLD:AAK7235  
Melanaphis|GMPJA9164-21|BIOUG66649-H10|BOLD:AAK7235  
Melanaphis|GMPJA9163-21|BIOUG66649-H09|BOLD:AAK7235  
Melanaphis|GMPJA9222-21|BIOUG66650-E09|BOLD:AAK7235  
Melanaphis|GMPJA9166-21|BIOUG66650-A01|BOLD:AAK7235  
Melanaphis|GMPJA10015-21|BIOUG66658-H06|BOLD:AAK7235  
Melanaphis|GMPJA9927-21|BIOUG66658-A02|BOLD:AAK7235  
Melanaphis|GMPJA9935-21|BIOUG66658-A10|BOLD:AAK7235  
Melanaphis|GMPJA9939-21|BIOUG66658-B02|BOLD:AAK7235  
Melanaphis|GMPJA9953-21|BIOUG66658-C04|BOLD:AAK7235  
Melanaphis|GMPJA9961-21|BIOUG66658-C12|BOLD:AAK7235  
Melanaphis|GMPJA9977-21|BIOUG66658-E04|BOLD:AAK7235  
Melanaphis|GMPJA10000-21|BIOUG66658-G03|BOLD:AAK7235  
Melanaphis|GMPJA9135-21|BIOUG66649-F05|BOLD:AAK7235  
Melanaphis|GMPJA10069-21|BIOUG66659-E01|BOLD:AAK7235  
Melanaphis|GMPJA9951-21|BIOUG66658-C02|BOLD:AAK7235  
Melanaphis|GMPJA7054-21|BIOUG66628-B12|BOLD:AAK7235  
Melanaphis|GMPJA2637-21|BIOUG65683-B11|BOLD:AAK7235  
Aphis|GMPJA2656-21|BIOUG65683-D06|BOLD:AAK7937  
Aphis|GMPJA840-21|BIOUG65664-C07|BOLD:AAA4183  
Aphis|GMPJA866-21|BIOUG65664-E09|BOLD:AAA4183  
Aphis|GMPJA2570-21|BIOUG65682-E03|BOLD:AAA4183  
Aphis|GMPJA806-21|BIOUG65663-H08|BOLD:AAA4183  
Aphis|GMPJA618-21|BIOUG65661-H10|BOLD:AAA4183  
Aphis|GMPJA2552-21|BIOUG65682-C09|BOLD:AAA4183  
Aphis|GMPJA2603-21|BIOUG65682-G12|BOLD:AAA3070  
Aphis|GMPJA2706-21|BIOUG65683-H08|BOLD:AAA3070  
Aphis|GMPJA565-21|BIOUG65661-D05|BOLD:AAA3070

- Aphis|GMPJA2005-21|BIOUG65682-G12|BOLD:AAA3070
- Aphis|GMPJA2706-21|BIOUG65683-H08|BOLD:AAA3070
- Aphis|GMPJA565-21|BIOUG65661-D05|BOLD:AAA3070
- Aphis|GMPJA568-21|BIOUG65661-D08|BOLD:AAA3070
- Aphis|GMPJA8974-21|BIOUG66647-H10|BOLD:AAA3070
- Aphis|GMPJA2688-21|BIOUG65683-G02|BOLD:AAA3070
- Aphis|GMPJA9141-21|BIOUG66649-F11|BOLD:AAA3070
- Aphis|GMPJA8940-21|BIOUG66647-E12|BOLD:AAA3070
- Aphis|GMPJA9086-21|BIOUG66649-B04|BOLD:AAA3070
- Aphis|GMPJA2657-21|BIOUG65683-D07|BOLD:AAA3070
- Aphis|GMPJA567-21|BIOUG65661-D07|BOLD:AAA3070
- Aphis|GMPJA2545-21|BIOUG65682-C02|BOLD:AAA3070
- Aphis|GMPJA2646-21|BIOUG65683-C08|BOLD:AAA3070
- Aphis|GMPJA2647-21|BIOUG65683-C09|BOLD:AAA3070
- Aphis|GMPJA2662-21|BIOUG65683-D12|BOLD:AAA3070
- Aphis|GMPJA2708-21|BIOUG65683-H10|BOLD:AAA3070
- Aphis|GMPJA5843-21|BIOUG66615-D12|BOLD:AAA3070
- Aphis|GMPJA8893-21|BIOUG66647-B01|BOLD:AAA3070
- Aphis|GMPJA8897-21|BIOUG66647-B05|BOLD:AAA3070
- Aphis|GMPJA8925-21|BIOUG66647-D09|BOLD:AAA3070
- Aphis|GMPJA8927-21|BIOUG66647-D11|BOLD:AAA3070
- Aphis|GMPJA8928-21|BIOUG66647-D12|BOLD:AAA3070
- Aphis|GMPJA8935-21|BIOUG66647-E07|BOLD:AAA3070
- Aphis|GMPJA8939-21|BIOUG66647-E11|BOLD:AAA3070
- Aphis|GMPJA8973-21|BIOUG66647-H09|BOLD:AAA3070
- Aphis|GMPJA8984-21|BIOUG66648-A09|BOLD:AAA3070
- Aphis|GMPJA8989-21|BIOUG66648-B02|BOLD:AAA3070
- Aphis|GMPJA8990-21|BIOUG66648-B03|BOLD:AAA3070
- Aphis|GMPJA8996-21|BIOUG66648-B09|BOLD:AAA3070
- Aphis|GMPJA9006-21|BIOUG66648-C07|BOLD:AAA3070
- Aphis|GMPJA9013-21|BIOUG66648-D02|BOLD:AAA3070
- Aphis|GMPJA9026-21|BIOUG66648-E03|BOLD:AAA3070
- Aphis|GMPJA9028-21|BIOUG66648-E05|BOLD:AAA3070
- Aphis|GMPJA9037-21|BIOUG66648-F02|BOLD:AAA3070
- Aphis|GMPJA9047-21|BIOUG66648-F12|BOLD:AAA3070
- Aphis|GMPJA9049-21|BIOUG66648-G02|BOLD:AAA3070
- Aphis|GMPJA9098-21|BIOUG66649-C04|BOLD:AAA3070
- Aphis|GMPJA9104-21|BIOUG66649-C10|BOLD:AAA3070
- Aphis|GMPJA9115-21|BIOUG66649-D09|BOLD:AAA3070
- Aphis|GMPJA9116-21|BIOUG66649-D10|BOLD:AAA3070
- Aphis|GMPJA9120-21|BIOUG66649-E02|BOLD:AAA3070
- Aphis|GMPJA9122-21|BIOUG66649-E04|BOLD:AAA3070
- Aphis|GMPJA9125-21|BIOUG66649-E07|BOLD:AAA3070
- Aphis|GMPJA9133-21|BIOUG66649-F03|BOLD:AAA3070
- Aphis|GMPJA9149-21|BIOUG66649-G07|BOLD:AAA3070
- Aphis|GMPJA9154-21|BIOUG66649-G12|BOLD:AAA3070
- Aphis|GMPJA9944-21|BIOUG66658-B07|BOLD:AAA3070
- Aphis|GMPJA9997-21|BIOUG66658-F12|BOLD:AAA3070
- Aphis|GMPJA10415-21|BIOUG70234-D03|BOLD:AAA3070
- Aphis|GMPJA10425-21|BIOUG70234-E01|BOLD:AAA3070
- Aphis|GMPJA10525-21|BIOUG70235-E06|BOLD:AAA3070
- Aphis|GMPJA10733-21|BIOUG70237-F12|BOLD:AAA3070
- Aphis|GMPJA249-21|BIOUG65658-A10|BOLD:AAA3070
- Aphis|GMPJA256-21|BIOUG65658-B05|BOLD:AAA3070
- Aphis|GMPJA257-21|BIOUG65658-B06|BOLD:AAA3070
- Aphis|GMPJA258-21|BIOUG65658-B07|BOLD:AAA3070
- Aphis|GMPJA260-21|BIOUG65658-B09|BOLD:AAA3070
- Aphis|GMPJA261-21|BIOUG65658-B10|BOLD:AAA3070
- Aphis|GMPJA317-21|BIOUG65658-G06|BOLD:AAA3070
- Aphis|GMPJA263-21|BIOUG65658-B12|BOLD:AAA3070
- Aphis|GMPJA322-21|BIOUG65658-G11|BOLD:AAA3070
- Aphis|GMPJA2566-21|BIOUG65682-D11|BOLD:AAA3070
- Aphis|GMPJA8961-21|BIOUG66647-G09|BOLD:AAA3070
- Aphis|GMPJA8926-21|BIOUG66647-D10|BOLD:AAA3070
- Aphis|GMPJA8898-21|BIOUG66647-B06|BOLD:AAA3070
- Aphis|GMPJA2544-21|BIOUG65682-C01|BOLD:AAA3070
- Aphis|GMPJA2543-21|BIOUG65682-B12|BOLD:AAA3070
- Rhopalosiphum|GMPJA262-21|BIOUG65658-B11|BOLD:AAE3554
- Aphis nerii|GMPJA320-21|BIOUG65658-G09|BOLD:AAC1372
- Aphis nerii|GMPJA248-21|BIOUG65658-A09|BOLD:AAC1372
- Aphis nerii|GMPJA2615-21|BIOUG65683-A01|BOLD:AAC1372
- Aphis nerii|GMPJA2592-21|BIOUG65682-G01|BOLD:AAC1372
- Aphis nerii|GMPJA2561-21|BIOUG65682-D06|BOLD:AAC1372
- Aphis nerii|GMPJA2542-21|BIOUG65682-B11|BOLD:AAC1372
- Myzus persicae|GMPJA827-21|BIOUG65664-B06|BOLD:AAA7683
- Myzus persicae|GMPJA868-21|BIOUG65664-E11|BOLD:AAA7683
- Myzus persicae|GMPJA2675-21|BIOUG65683-F01|BOLD:AAA7683
- Aphididae|GMPJA9143-21|BIOUG66649-G01|BOLD:ADZ9938
- Brevicoryne brassicae|GMPJA2640-21|BIOUG65683-C02|BOLD:AAD0145
- Brevicoryne brassicae|GMPJA2629-21|BIOUG65683-B03|BOLD:AAD0145
- Hyperomyzus carduellinus|GMPJA2585-21|BIOUG65682-F06|BOLD:ABZ3432
- Hyperomyzus|GMPJA2600-21|BIOUG65682-G09|BOLD:AAB8566
- Hyperomyzus|GMPJA2522-21|BIOUG65682-A03|BOLD:AAB8566
- Sitobion avenae|GMPJA2533-21|BIOUG65682-B02|BOLD:AAB4894
- Sitobion avenae|GMPJA2532-21|BIOUG65682-B01|BOLD:AAB4894
- Sitobion avenae|GMPJA2601-21|BIOUG65682-G10|BOLD:AAB4894
- Sitobion avenae|GMPJA2582-21|BIOUG65682-F03|BOLD:AAB4894
- Sitobion avenae|GMPJA2665-21|BIOUG65683-E03|BOLD:AAB4894
- Sitobion avenae|GMPJA2588-21|BIOUG65682-F09|BOLD:AAB4894
- Sitobion avenae|GMPJA2650-21|BIOUG65683-C12|BOLD:AAB4894
- Sitobion avenae|GMPJA2599-21|BIOUG65682-G08|BOLD:AAB4894
- Sitobion avenae|GMPJA2576-21|BIOUG65682-E09|BOLD:AAB4894
- Sitobion avenae|GMPJA2540-21|BIOUG65682-B09|BOLD:AAB4894
- Sitobion avenae|GMPJA2614-21|BIOUG65682-H11|BOLD:AAB4894
- Sitobion avenae|GMPJA2598-21|BIOUG65682-G07|BOLD:AAB4894
- Sitobion avenae|GMPJA2597-21|BIOUG65682-G06|BOLD:AAB4894
- Sitobion avenae|GMPJA2568-21|BIOUG65682-E01|BOLD:AAB4894
- Sitobion avenae|GMPJA2534-21|BIOUG65682-B03|BOLD:AAB4894
- Sitobion avenae|GMPJA2529-21|BIOUG65682-A10|BOLD:AAB4894
- Sitobion avenae|GMPJA2616-21|BIOUG65683-A02|BOLD:AAB4894
- Sitobion avenae|GMPJA2638-21|BIOUG65683-B12|BOLD:AAB4894
- Sitobion avenae|GMPJA2596-21|BIOUG65682-G05|BOLD:AAB4894
- Sitobion avenae|GMPJA2630-21|BIOUG65683-B04|BOLD:AAB4894



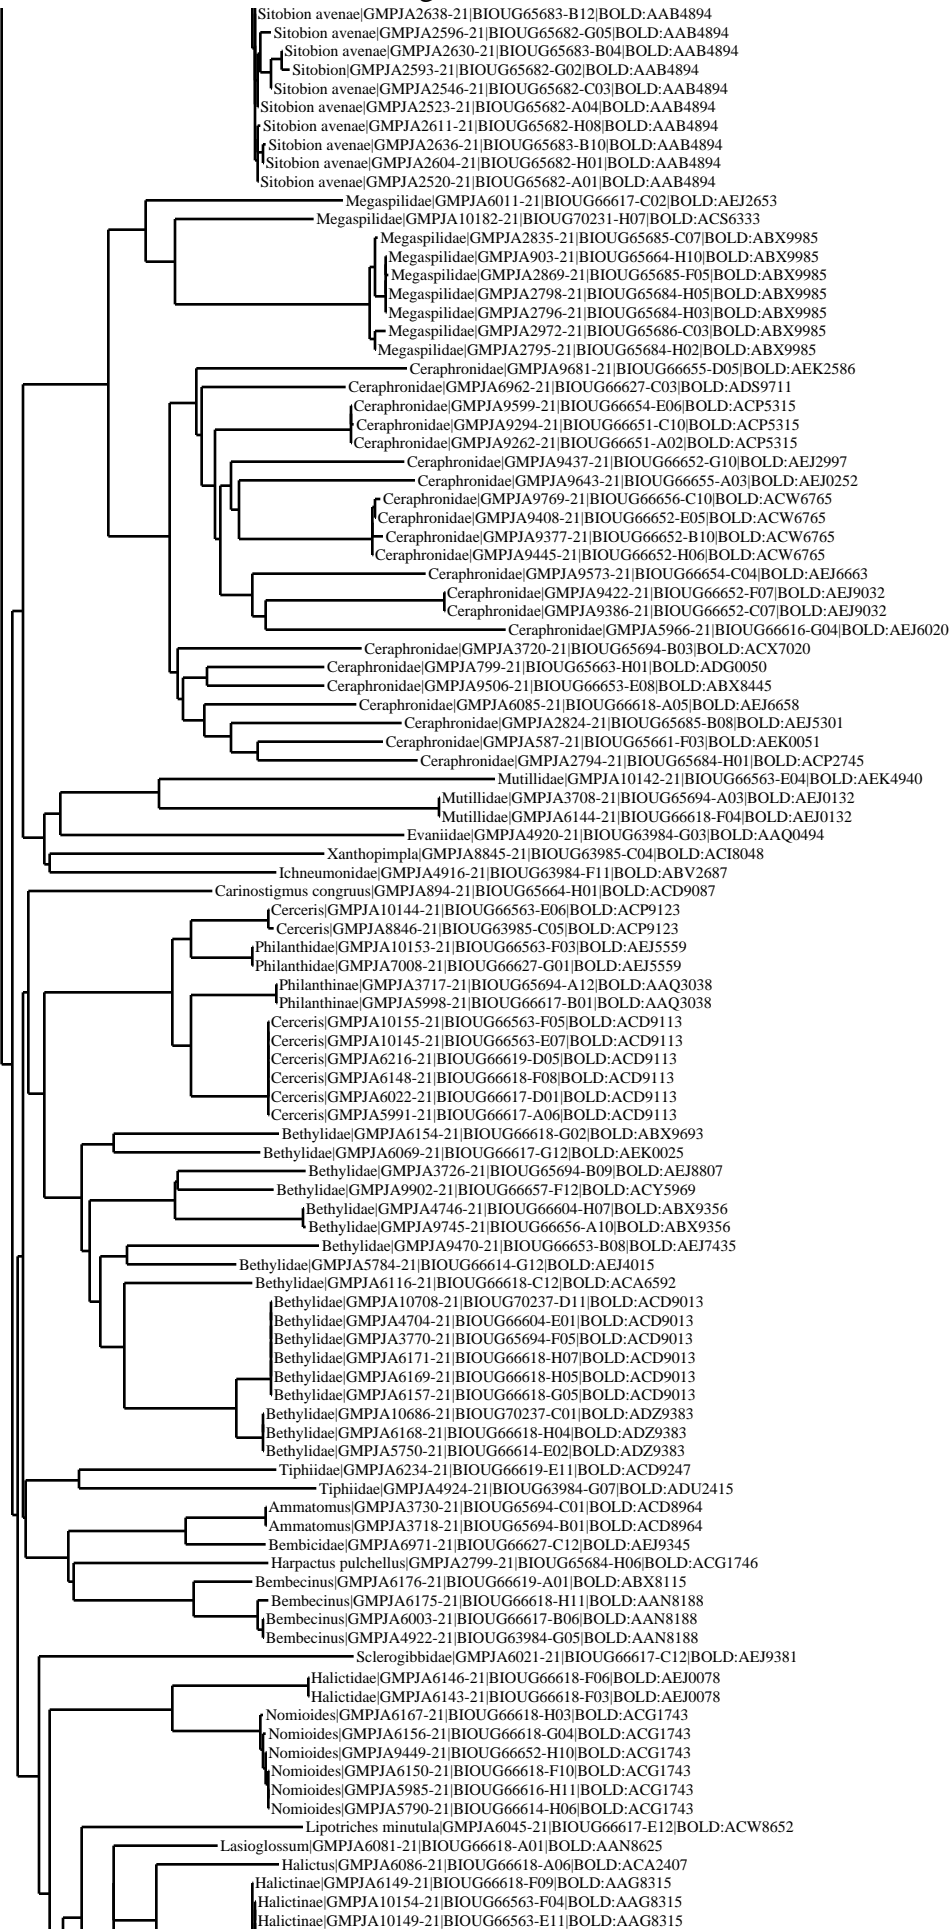

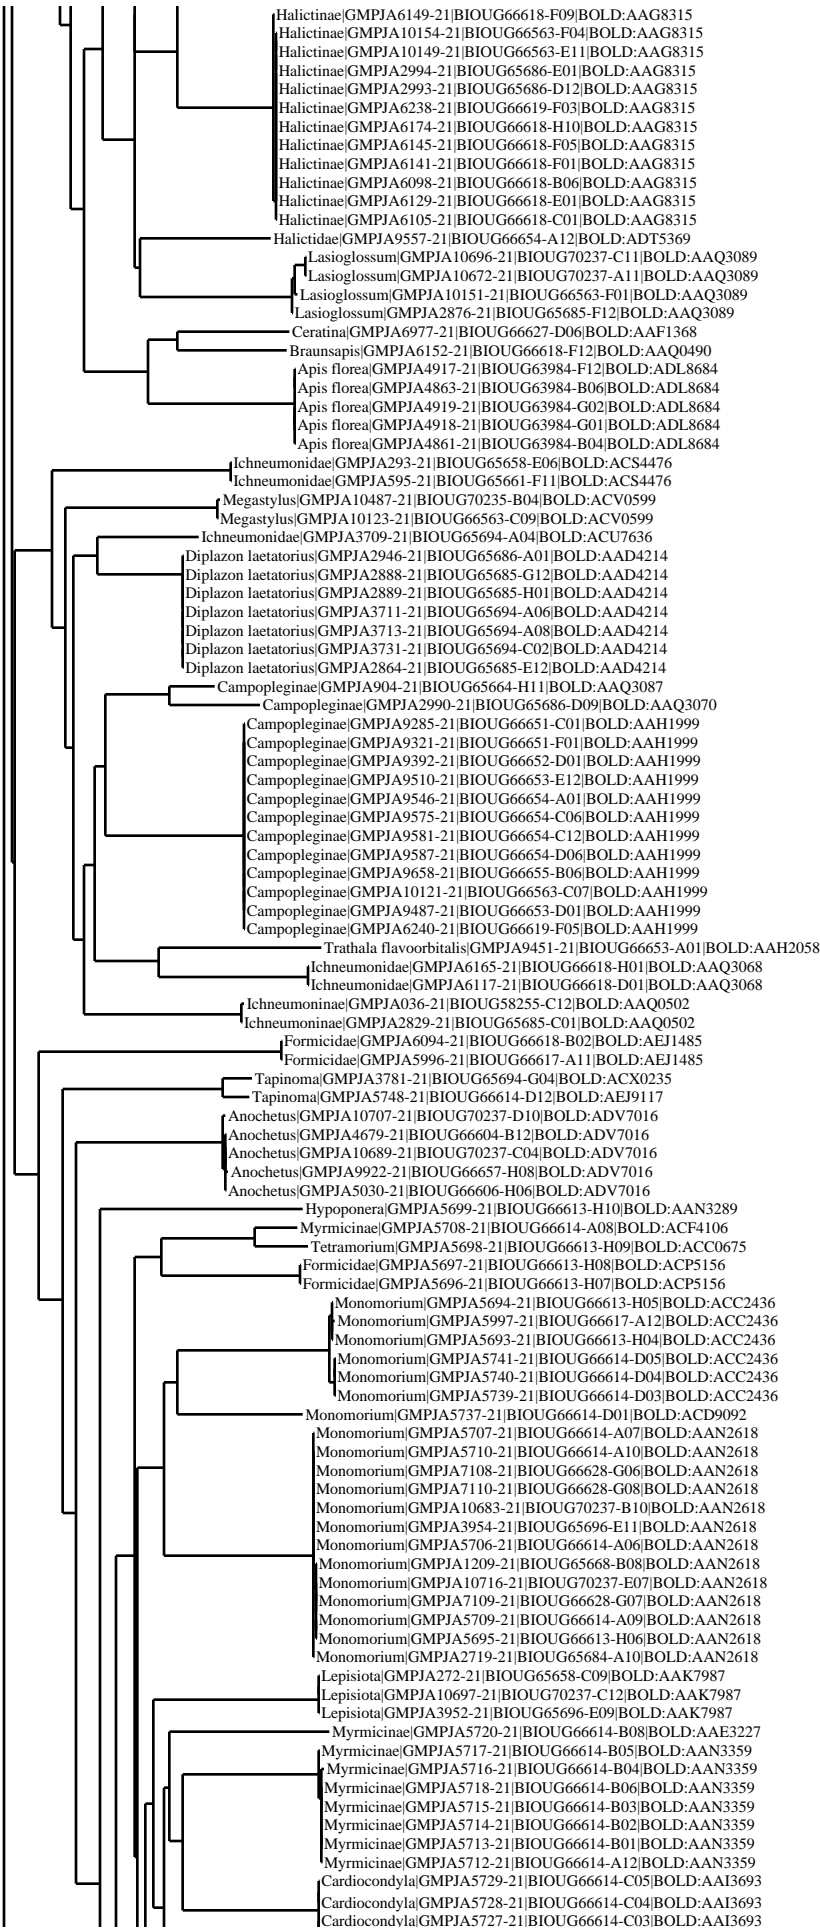

Cardiocondyla[GMPJA5729-21|BIOUG66614-C05|BOLD:AAI3693  
 Cardiocondyla[GMPJA5728-21|BIOUG66614-C04|BOLD:AAI3693  
 Cardiocondyla[GMPJA5727-21|BIOUG66614-C03|BOLD:AAI3693  
 Cardiocondyla[GMPJA5726-21|BIOUG66614-C02|BOLD:AAI3693  
 Myrmicinae[GMPJA3780-21|BIOUG65694-G03|BOLD:AAA8461  
 Formicidae[GMPJA551-21|BIOUG65661-C03|BOLD:AEA2062  
 Formicidae[GMPJA3779-21|BIOUG65694-G02|BOLD:AEA2062  
 Monomorium[GMPJA10671-21|BIOUG70237-A10|BOLD:ACE3527  
 Monomorium[GMPJA10712-21|BIOUG70237-E03|BOLD:ACE3527  
 Monomorium[GMPJA10711-21|BIOUG70237-E02|BOLD:ACE3527  
 Monomorium[GMPJA10705-21|BIOUG70237-D08|BOLD:ACE3527  
 Monomorium[GMPJA10721-21|BIOUG70237-E12|BOLD:ACE3527  
 Monomorium[GMPJA10720-21|BIOUG70237-E11|BOLD:ACE3527  
 Monomorium[GMPJA10701-21|BIOUG70237-D04|BOLD:ACE3527  
 Monomorium[GMPJA10699-21|BIOUG70237-D02|BOLD:ACE3527  
 Monomorium[GMPJA10690-21|BIOUG70237-C05|BOLD:ACE3527  
 Monomorium[GMPJA10684-21|BIOUG70237-B11|BOLD:ACE3527  
 Monomorium[GMPJA10680-21|BIOUG70237-B07|BOLD:ACE3527  
 Monomorium[GMPJA10676-21|BIOUG70237-B03|BOLD:ACE3527  
 Monomorium[GMPJA10692-21|BIOUG70237-C07|BOLD:ACE3527  
 Monomorium[GMPJA5722-21|BIOUG66614-B10|BOLD:ACE3527  
 Monomorium[GMPJA5721-21|BIOUG66614-B09|BOLD:ACE3527  
 Monomorium[GMPJA5724-21|BIOUG66614-B12|BOLD:ACE3527  
 Formicidae[GMPJA772-21|BIOUG65663-E10|BOLD:AEJ7449  
 Pheidole[GMPJA269-21|BIOUG65658-C06|BOLD:AEN3454  
 Pheidole[GMPJA881-21|BIOUG65664-F12|BOLD:AEN3454  
 Pheidole[GMPJA3950-21|BIOUG65696-E07|BOLD:AEN3454  
 Pheidole[GMPJA3963-21|BIOUG65696-F08|BOLD:AEN3454  
 Pheidole[GMPJA5723-21|BIOUG66614-B11|BOLD:AEN3454  
 Pheidole[GMPJA5733-21|BIOUG66614-C09|BOLD:AEN3454  
 Pheidole[GMPJA5734-21|BIOUG66614-C10|BOLD:AEN3454  
 Pheidole[GMPJA6343-21|BIOUG66620-G01|BOLD:AEN3454  
 Pheidole[GMPJA6344-21|BIOUG66620-G02|BOLD:AEN3454  
 Pheidole[GMPJA6346-21|BIOUG66620-G04|BOLD:AEN3454  
 Pheidole[GMPJA10685-21|BIOUG70237-B12|BOLD:AEN3454  
 Pheidole[GMPJA10691-21|BIOUG70237-C06|BOLD:AEN3454  
 Pheidole[GMPJA6345-21|BIOUG66620-G03|BOLD:AEN3454  
 Pheidole[GMPJA5732-21|BIOUG66614-C08|BOLD:AEN3454  
 Pheidole[GMPJA5725-21|BIOUG66614-C01|BOLD:AEN3454  
 Pheidole[GMPJA880-21|BIOUG65664-F11|BOLD:AEN3454  
 Pheidole[GMPJA5749-21|BIOUG66614-E01|BOLD:AEN3454  
 Pheidole[GMPJA5731-21|BIOUG66614-C07|BOLD:AEN3454  
 Pheidole[GMPJA7101-21|BIOUG66628-F11|BOLD:AEN3454  
 Pheidole[GMPJA7100-21|BIOUG66628-F10|BOLD:AEN3454  
 Pheidole[GMPJA3953-21|BIOUG65696-E10|BOLD:AEN3454  
 Pheidole[GMPJA3964-21|BIOUG65696-F09|BOLD:AEN3454  
 Pheidole[GMPJA3967-21|BIOUG65696-F12|BOLD:AEN3454  
 Pheidole[GMPJA10693-21|BIOUG70237-C08|BOLD:AEN3454  
 Pheidole[GMPJA10709-21|BIOUG70237-D12|BOLD:AEN3454  
 Pheidole[GMPJA10715-21|BIOUG70237-E06|BOLD:AEN3454  
 Pheidole[GMPJA267-21|BIOUG65658-C04|BOLD:AEN3454  
 Pheidole[GMPJA3951-21|BIOUG65696-E08|BOLD:AEN3454  
 Pheidole[GMPJA268-21|BIOUG65658-C05|BOLD:AEN3454  
 Pheidole[GMPJA7105-21|BIOUG66628-G03|BOLD:AEN3454  
 Pheidole[GMPJA7102-21|BIOUG66628-F12|BOLD:AEN3454  
 Pheidole[GMPJA2720-21|BIOUG65684-A11|BOLD:AEN3454  
 Pheidole[GMPJA5738-21|BIOUG66614-D02|BOLD:AAC3359  
 Pheidole[GMPJA5736-21|BIOUG66614-C12|BOLD:AAC3359  
 Pheidole[GMPJA5735-21|BIOUG66614-C11|BOLD:AAC3359  
 Pheidole[GMPJA5743-21|BIOUG66614-D07|BOLD:AAQ3108  
 Pheidole[GMPJA7106-21|BIOUG66628-G04|BOLD:AAQ3108  
 Pheidole[GMPJA7107-21|BIOUG66628-G05|BOLD:AAQ3108  
 Pheidole[GMPJA10475-21|BIOUG70235-A04|BOLD:AAQ3108  
 Pheidole[GMPJA3965-21|BIOUG65696-F10|BOLD:AAQ3108  
 Pheidole[GMPJA10722-21|BIOUG70237-F01|BOLD:AAQ3108  
 Pheidole[GMPJA7104-21|BIOUG66628-G02|BOLD:AAQ3108  
 Pheidole[GMPJA5745-21|BIOUG66614-D09|BOLD:AAQ3108  
 Pheidole[GMPJA5744-21|BIOUG66614-D08|BOLD:AAQ3108  
 Pheidole[GMPJA7103-21|BIOUG66628-G01|BOLD:AAQ3108  
 Pheidole[GMPJA5742-21|BIOUG66614-D06|BOLD:AAQ3108  
 Pheidole[GMPJA2718-21|BIOUG65684-A09|BOLD:AAQ3108  
 Pheidole[GMPJA2717-21|BIOUG65684-A08|BOLD:AAQ3108  
 Formicidae[GMPJA2900-21|BIOUG58255-E02|BOLD:AAQ0513  
 Paratrechina longicornis[GMPJA550-21|BIOUG65661-C02|BOLD:AAA1675  
 Paratrechina longicornis[GMPJA331-21|BIOUG65658-H08|BOLD:AAA1675  
 Paratrechina longicornis[GMPJA332-21|BIOUG65658-H09|BOLD:AAA1675  
 Paratrechina longicornis[GMPJA334-21|BIOUG65658-H11|BOLD:AAA1675  
 Paratrechina longicornis[GMPJA1208-21|BIOUG65668-B07|BOLD:AAA1675  
 Paratrechina longicornis[GMPJA549-21|BIOUG65661-C01|BOLD:AAA1675  
 Paratrechina longicornis[GMPJA7116-21|BIOUG66628-H02|BOLD:AAA1675  
 Paratrechina longicornis[GMPJA5704-21|BIOUG66614-A04|BOLD:AAA1675  
 Paratrechina longicornis[GMPJA5702-21|BIOUG66614-A02|BOLD:AAA1675  
 Paratrechina longicornis[GMPJA273-21|BIOUG65658-C10|BOLD:EEE9082  
 Formicinae[GMPJA333-21|BIOUG65658-H10|BOLD:AAA1676  
 Formicinae[GMPJA5705-21|BIOUG66614-A05|BOLD:AAA1676  
 Formicinae[GMPJA6347-21|BIOUG66620-G05|BOLD:AAA1676  
 Formicinae[GMPJA6348-21|BIOUG66620-G06|BOLD:AAA1676  
 Formicinae[GMPJA7111-21|BIOUG66628-G09|BOLD:AAA1676  
 Formicinae[GMPJA7112-21|BIOUG66628-G10|BOLD:AAA1676  
 Formicinae[GMPJA7114-21|BIOUG66628-G12|BOLD:AAA1676  
 Formicinae[GMPJA7115-21|BIOUG66628-H01|BOLD:AAA1676  
 Formicinae[GMPJA9923-21|BIOUG66657-H09|BOLD:AAA1676  
 Formicinae[GMPJA10183-21|BIOUG70231-H08|BOLD:AAA1676  
 Formicinae[GMPJA10177-21|BIOUG70231-H02|BOLD:AAA1676  
 Formicinae[GMPJA10673-21|BIOUG70237-A12|BOLD:AAA1676  
 Formicinae[GMPJA10687-21|BIOUG70237-C02|BOLD:AAA1676  
 Formicinae[GMPJA10677-21|BIOUG70237-B04|BOLD:AAA1676  
 Formicinae[GMPJA7113-21|BIOUG66628-G11|BOLD:AAA1676  
 Formicinae[GMPJA5703-21|BIOUG66614-A03|BOLD:AAA1676  
 Formicinae[GMPJA5701-21|BIOUG66614-A01|BOLD:AAA1676  
 Formicinae[GMPJA2955-21|BIOUG65686-A10|BOLD:AAA9461  
 Formicidae[GMPJA280-21|BIOUG65658-D05|BOLD:AEJ4811  
 Camponotus[GMPJA022-21|BIOUG58255-B10|BOLD:AAO0512

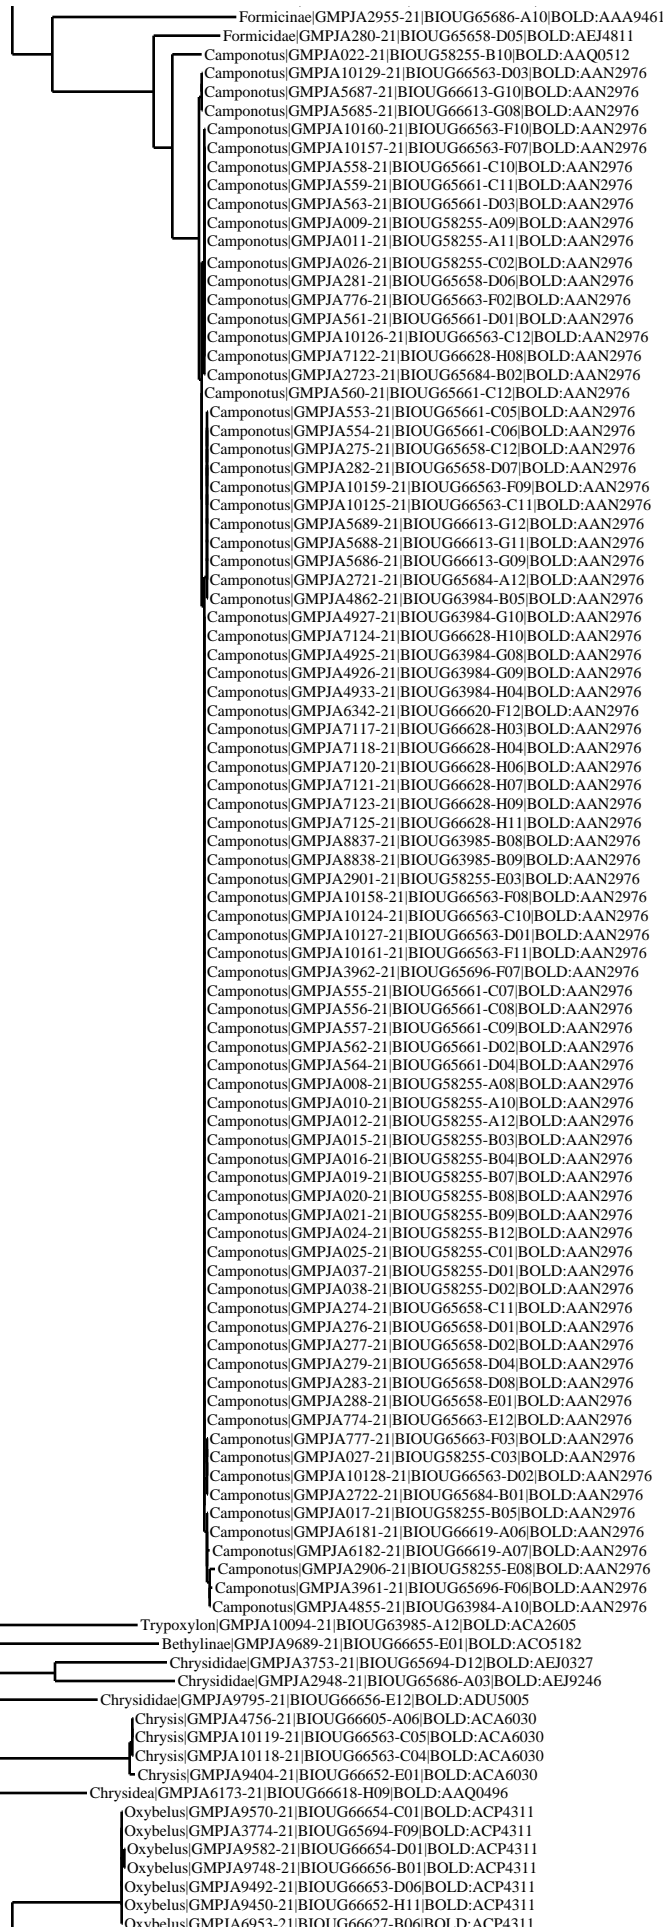

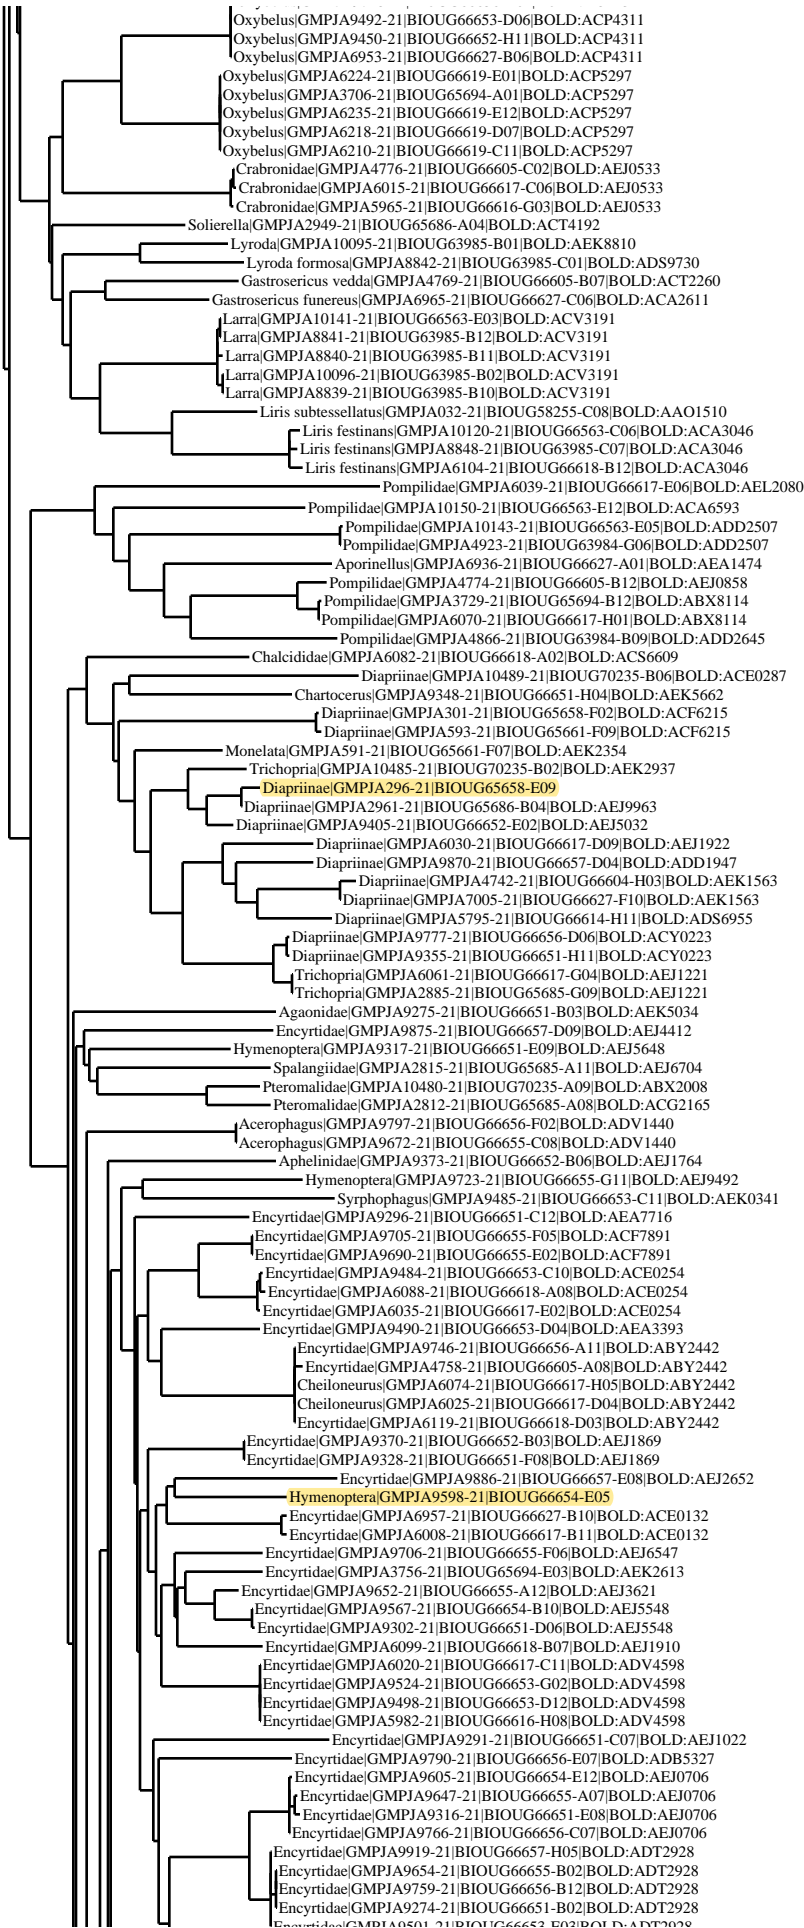

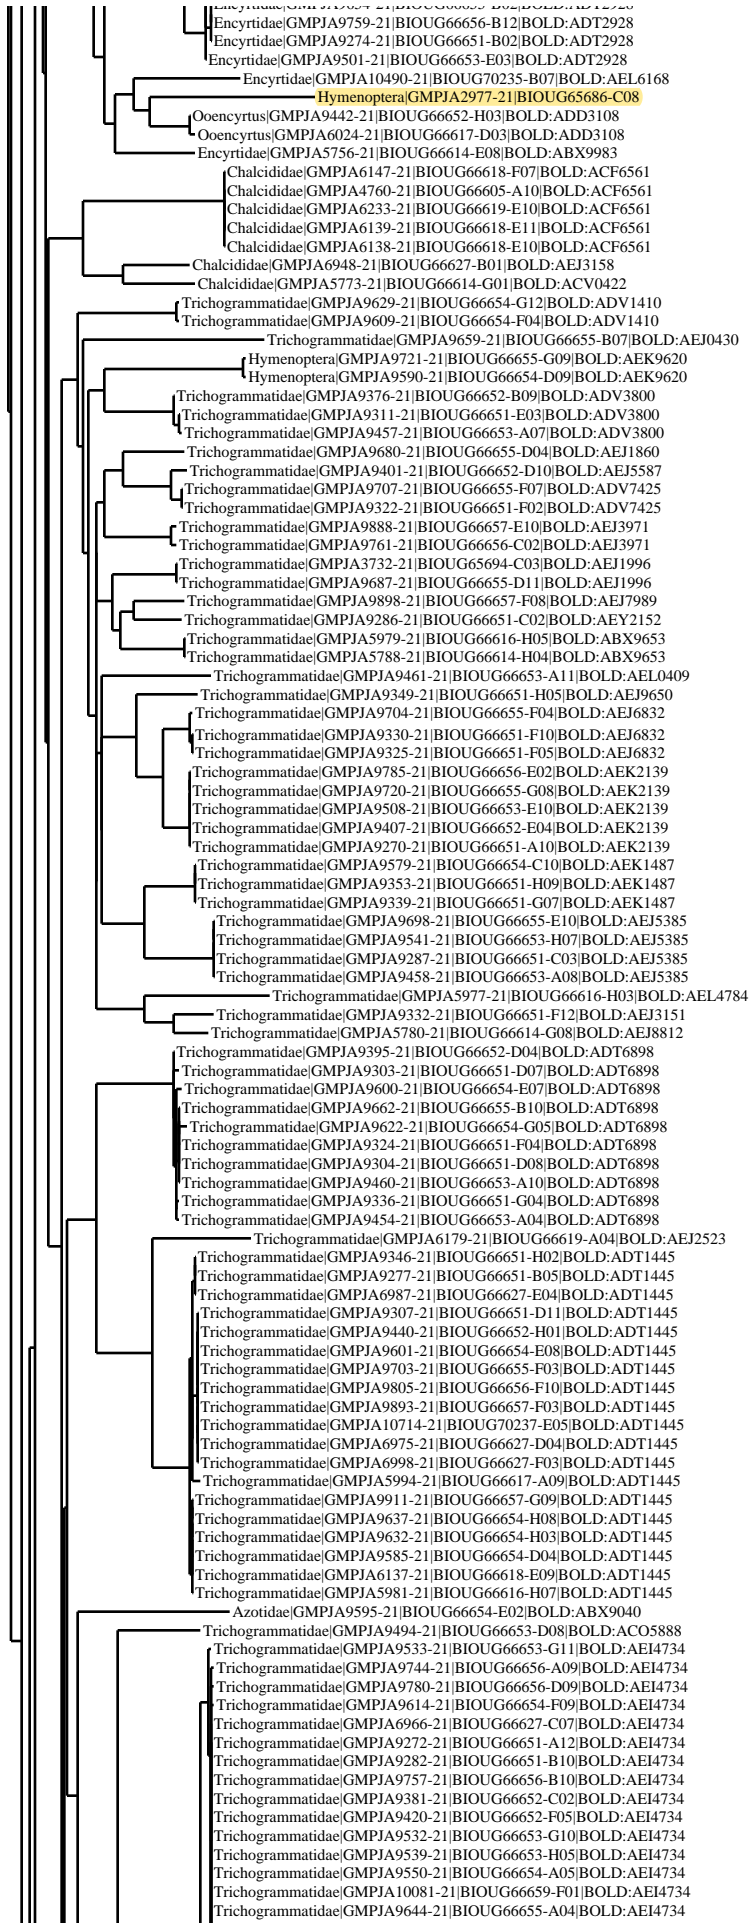

Trichogrammatidae|GMPJA9330-21|BIOUG66659-A03|BOLD:AEI4734  
 Trichogrammatidae|GMPJA10081-21|BIOUG66659-F01|BOLD:AEI4734  
 Trichogrammatidae|GMPJA9644-21|BIOUG66655-A04|BOLD:AEI4734  
 Trichogrammatidae|GMPJA9661-21|BIOUG66655-B09|BOLD:AEI4734  
 Trichogrammatidae|GMPJA9667-21|BIOUG66655-C03|BOLD:AEI4734  
 Trichogrammatidae|GMPJA9678-21|BIOUG66655-D02|BOLD:AEI4734  
 Trichogrammatidae|GMPJA9715-21|BIOUG66655-G03|BOLD:AEI4734  
 Trichogrammatidae|GMPJA9719-21|BIOUG66655-G07|BOLD:AEI4734  
 Trichogrammatidae|GMPJA9782-21|BIOUG66656-D11|BOLD:AEI4734  
 Trichogrammatidae|GMPJA9799-21|BIOUG66656-F04|BOLD:AEI4734  
 Trichogrammatidae|GMPJA9803-21|BIOUG66656-F08|BOLD:AEI4734  
 Trichogrammatidae|GMPJA9823-21|BIOUG66656-H04|BOLD:AEI4734  
 Trichogrammatidae|GMPJA9838-21|BIOUG66657-A08|BOLD:AEI4734  
 Trichogrammatidae|GMPJA9851-21|BIOUG66657-B09|BOLD:AEI4734  
 Trichogrammatidae|GMPJA10486-21|BIOUG70235-B03|BOLD:AEI4734  
 Trichogrammatidae|GMPJA10678-21|BIOUG70237-B05|BOLD:AEI4734  
 Trichogrammatidae|GMPJA9488-21|BIOUG66653-D02|BOLD:AEI4734  
 Trichogrammatidae|GMPJA9295-21|BIOUG66651-C11|BOLD:AEI4734  
 Trichogrammatidae|GMPJA9668-21|BIOUG66655-C04|BOLD:AEI4734  
 Trichogrammatidae|GMPJA9357-21|BIOUG66652-A02|BOLD:AEI4734  
 Trichogrammatidae|GMPJA9273-21|BIOUG66651-B01|BOLD:AEI4734  
 Trichogrammatidae|GMPJA7002-21|BIOUG66627-F07|BOLD:AEI4734  
 Trichogrammatidae|GMPJA6042-21|BIOUG66617-E09|BOLD:AEI4734  
 Trichogrammatidae|GMPJA6032-21|BIOUG66617-D11|BOLD:AEI4734  
 Trichogrammatidae|GMPJA6133-21|BIOUG66618-E05|BOLD:AEI4734  
 Trichogrammatidae|GMPJA6126-21|BIOUG66618-D10|BOLD:AEI4734  
 Trichogrammatidae|GMPJA9663-21|BIOUG66655-B11|BOLD:AEI4734  
 Trichogrammatidae|GMPJA9615-21|BIOUG66654-F10|BOLD:AEI4734  
 Trichogrammatidae|GMPJA9310-21|BIOUG66651-E02|BOLD:AEI4734  
 Trichogrammatidae|GMPJA9472-21|BIOUG66653-B10|BOLD:AEI4734  
 Trichogrammatidae|GMPJA6979-21|BIOUG66627-D08|BOLD:AEI4734  
 Trichogrammatidae|GMPJA9794-21|BIOUG66656-E11|BOLD:AEI4734  
 Trichogrammatidae|GMPJA9670-21|BIOUG66655-C06|BOLD:AEI4734  
 Trichogrammatidae|GMPJA5787-21|BIOUG66614-H03|BOLD:AEI4734  
 Trichogrammatidae|GMPJA9798-21|BIOUG66656-F03|BOLD:AEK15214  
 Trichogrammatidae|GMPJA9358-21|BIOUG66652-A03|BOLD:AEK15214  
 Trichogrammatidae|GMPJA6954-21|BIOUG66627-B07|BOLD:ACV2530  
 Trichogrammatidae|GMPJA9503-21|BIOUG66653-E05|BOLD:ACV2530  
 Trichogrammatidae|GMPJA9393-21|BIOUG66652-D02|BOLD:ACV2530  
 Trichogrammatidae|GMPJA9685-21|BIOUG66655-D09|BOLD:ACV2530  
 Trichogrammatidae|GMPJA9892-21|BIOUG66657-F02|BOLD:ACV2530  
 Trichogrammatidae|GMPJA9562-21|BIOUG66654-B05|BOLD:ACV2530  
 Trichogrammatidae|GMPJA6001-21|BIOUG66617-B04|BOLD:ACV2530  
 Trichogrammatidae|GMPJA9459-21|BIOUG66653-A09|BOLD:AEL6710  
 Trichogrammatidae|GMPJA5762-21|BIOUG66614-F02|BOLD:AEL6710  
 Trichogrammatidae|GMPJA9564-21|BIOUG66654-B07|BOLD:AEK1090  
 Trichogrammatidae|GMPJA2838-21|BIOUG65685-C10|BOLD:AEK1090  
 Hymenoptera|GMPJA9444-21|BIOUG66652-H05|BOLD:AEK1452  
 Aphelinidae|GMPJA6944-21|BIOUG66627-A09|BOLD:AEJ3177  
 Aphelinidae|GMPJA3721-21|BIOUG65694-B04|BOLD:ADT9167  
 Encarsia|GMPJA10181-21|BIOUG70231-H06|BOLD:AEL0236  
 Aphelinidae|GMPJA9845-21|BIOUG66657-B03|BOLD:AEK0199  
 Aphelinidae|GMPJA3761-21|BIOUG65694-E08|BOLD:AEJ1545  
 Aphelinidae|GMPJA10008-21|BIOUG66658-G11|BOLD:AEJ1545  
 Encarsia|GMPJA9916-21|BIOUG66657-H02|BOLD:AEJ1871  
 Aphelinidae|GMPJA9288-21|BIOUG66651-C04|BOLD:AEJ7099  
 Encarsia|GMPJA9829-21|BIOUG66656-H10|BOLD:AEJ2192  
 Encarsia|GMPJA9770-21|BIOUG66656-C11|BOLD:AEJ2192  
 Aphelinidae|GMPJA9276-21|BIOUG66651-B04|BOLD:AEJ9728  
 Aphelinidae|GMPJA9786-21|BIOUG66656-E03|BOLD:AEJ9728  
 Aphelinidae|GMPJA9640-21|BIOUG66654-H11|BOLD:AEJ9728  
 Aphelinidae|GMPJA9301-21|BIOUG66651-D05|BOLD:AEJ9728  
 Aphelinidae|GMPJA9271-21|BIOUG66651-A11|BOLD:AEJ9728  
 Aphelinidae|GMPJA6982-21|BIOUG66627-D11|BOLD:AEJ9728  
 Hymenoptera|GMPJA2980-21|BIOUG65686-C11  
 Encarsia sophia|GMPJA9344-21|BIOUG66651-G12|BOLD:ACV5388  
 Encarsia sophia|GMPJA9642-21|BIOUG66655-A02|BOLD:ACV5388  
 Encarsia sophia|GMPJA9495-21|BIOUG66653-D09|BOLD:ACV5388  
 Encarsia sophia|GMPJA9453-21|BIOUG66653-A03|BOLD:ACV5388  
 Encarsia sophia|GMPJA6980-21|BIOUG66627-D09|BOLD:ACV5388  
 Encarsia sophia|GMPJA6232-21|BIOUG66619-E09|BOLD:ACV5388  
 Aphelinidae|GMPJA6103-21|BIOUG66618-B11|BOLD:ACZ3739  
 Aphelinidae|GMPJA9804-21|BIOUG66656-F09|BOLD:ACZ3739  
 Aphelinidae|GMPJA6007-21|BIOUG66617-B10|BOLD:ACZ3739  
 Aphelinidae|GMPJA5771-21|BIOUG66614-F11|BOLD:ACZ3739  
 Aphelinidae|GMPJA9837-21|BIOUG66657-A07|BOLD:AEK0508  
 Aphelinidae|GMPJA9657-21|BIOUG66655-B05|BOLD:AEK0508  
 Aphelinidae|GMPJA9351-21|BIOUG66651-H07|BOLD:AEK0508  
 Aphelinidae|GMPJA9754-21|BIOUG66656-B07|BOLD:AEK0508  
 Aphelinidae|GMPJA5755-21|BIOUG66614-E07|BOLD:AEK0508  
 Pteromalus|GMPJA2995-21|BIOUG65686-E02|BOLD:AEB8499  
 Pteromalidae|GMPJA10719-21|BIOUG70237-E10|BOLD:AEK1181  
 Anisopteromalus calandrae|GMPJA2871-21|BIOUG65685-F07|BOLD:ACH9993  
 Hymenoptera|GMPJA9433-21|BIOUG66652-G06|BOLD:AEJ0250  
 Pachyneuron aphidis|GMPJA2892-21|BIOUG65685-H04|BOLD:ABX8442  
 Pachyneuron aphidis|GMPJA2860-21|BIOUG65685-E08|BOLD:ABX8442  
 Hymenoptera|GMPJA9735-21|BIOUG66655-H11  
 Encyrtidae|GMPJA10482-21|BIOUG70235-A11|BOLD:AEN4257  
 Hymenoptera|GMPJA9281-21|BIOUG66651-B09|BOLD:ACQ0763  
 Eurytomidae|GMPJA9548-21|BIOUG66654-A03|BOLD:ACV5813  
 Eurytomidae|GMPJA9820-21|BIOUG66656-H01|BOLD:ACO6604  
 Eurytomidae|GMPJA9572-21|BIOUG66654-C03|BOLD:ACO6604  
 Eurytomidae|GMPJA9518-21|BIOUG66653-F08|BOLD:ACO6604  
 Eulophidae|GMPJA9887-21|BIOUG66657-E09|BOLD:AEJ9050  
 Eulophidae|GMPJA9819-21|BIOUG66656-G12|BOLD:ABY1563  
 Eulophidae|GMPJA9434-21|BIOUG66652-G07|BOLD:AEK0506  
 Eulophidae|GMPJA9762-21|BIOUG66656-C03|BOLD:AEK0506  
 Eulophidae|GMPJA9821-21|BIOUG66656-H02|BOLD:AEJ0926  
 Eulophidae|GMPJA9447-21|BIOUG66652-H08|BOLD:AEK1485  
 Hymenoptera|GMPJA10704-21|BIOUG70237-D07|BOLD:AEK1110  
 Hymenoptera|GMPJA6142-21|BIOUG66618-F02|BOLD:AEK1110  
 Pteromalidae|GMPJA3748-21|BIOUG65694-D07|BOLD:ABX9358  
 Pteromalidae|GMPJA3733-21|BIOUG65694-C04|BOLD:ABX9358

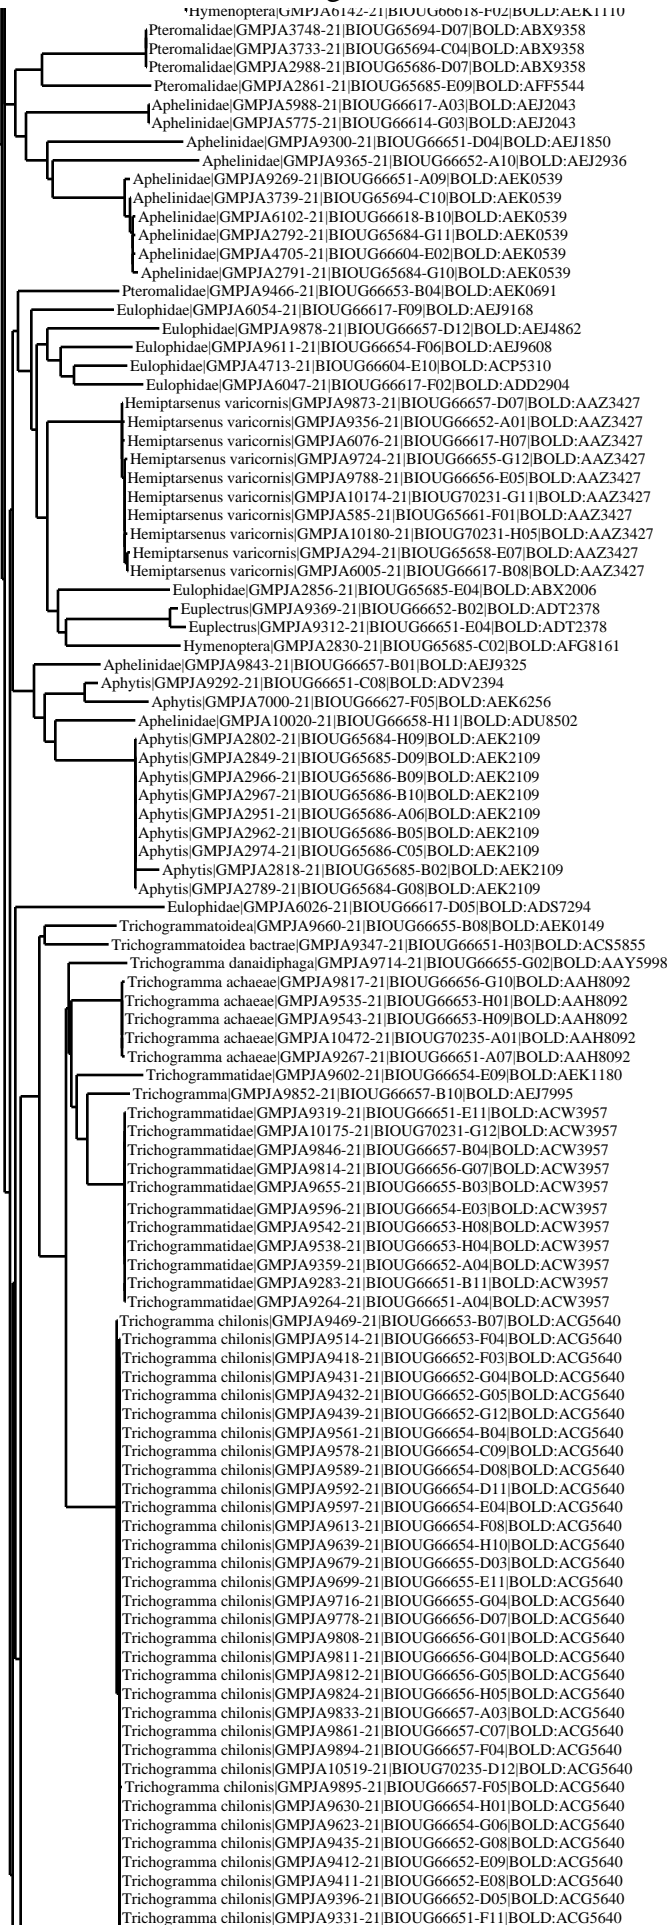



Trichogramma chilonis|GMPJA9411-21|BIOUG66652-E08|BOLD:ACG5640  
 Trichogramma chilonis|GMPJA9396-21|BIOUG66652-D05|BOLD:ACG5640  
 Trichogramma chilonis|GMPJA9331-21|BIOUG66651-F11|BOLD:ACG5640  
 Trichogramma chilonis|GMPJA9326-21|BIOUG66651-F06|BOLD:ACG5640  
 Trichogramma chilonis|GMPJA9750-21|BIOUG66656-B03|BOLD:ACG5640  
 Trichogramma chilonis|GMPJA9280-21|BIOUG66651-B08|BOLD:ACG5640  
 Trichogramma chilonis|GMPJA9502-21|BIOUG66653-E04|BOLD:ACG5640  
 Trichogramma chilonis|GMPJA9446-21|BIOUG66652-H07|BOLD:ACG5640  
 Trichogramma chilonis|GMPJA7003-21|BIOUG66627-F08|BOLD:ACG5640  
 Trichogramma chilonis|GMPJA7001-21|BIOUG66627-F06|BOLD:ACG5640  
 Trichogramma chilonis|GMPJA6068-21|BIOUG66617-G11|BOLD:ACG5640  
 Trichogrammatidae|GMPJA9835-21|BIOUG66657-A05|BOLD:ACX7100  
 Trichogrammatidae|GMPJA9792-21|BIOUG66656-E09|BOLD:ACX7100  
 Trichogrammatidae|GMPJA9612-21|BIOUG66654-F07|BOLD:ACX7100  
 Cleonymidae|GMPJA9568-21|BIOUG66654-B11|BOLD:AEJ9926  
 Coccophagus|GMPJA2839-21|BIOUG65685-C11|BOLD:AEJ8209  
 Aphelinus|GMPJA3737-21|BIOUG65694-C08|BOLD:ABW3282  
 Aphelinus|GMPJA2882-21|BIOUG65685-G06|BOLD:ABW3282  
 Hymenoptera|GMPJA1728-21|BIOUG65673-F04|BOLD:ABX9031  
 Hymenoptera|GMPJA3744-21|BIOUG65694-D03|BOLD:ABX9031  
 Aphelinidae|GMPJA2868-21|BIOUG65685-F04|BOLD:AEL1657  
 Aphelinidae|GMPJA9580-21|BIOUG66654-C11|BOLD:AEJ2819  
 Aphelinidae|GMPJA2837-21|BIOUG65685-C09|BOLD:ABY0866  
 Aphelinidae|GMPJA9650-21|BIOUG66655-A10|BOLD:AEK0838  
 Aphelinidae|GMPJA9387-21|BIOUG66652-C08|BOLD:AEJ4498  
 Aphelinidae|GMPJA6956-21|BIOUG66627-B09|BOLD:AEJ4498  
 Aphelinidae|GMPJA9800-21|BIOUG66656-F05|BOLD:AEJ6016  
 Aphelinidae|GMPJA2973-21|BIOUG65686-C04|BOLD:AEJ6016  
 Aphelinidae|GMPJA9686-21|BIOUG66655-D10|BOLD:AEJ6016  
 Aphelinidae|GMPJA2836-21|BIOUG65685-C08|BOLD:ADD1020  
 Aphelinidae|GMPJA2826-21|BIOUG65685-B10|BOLD:ADV8878  
 Hymenoptera|GMPJA5993-21|BIOUG66617-A08|BOLD:AEK1111  
 Eupelmus|GMPJA2896-21|BIOUG65685-H08|BOLD:AEK2135  
 Mymaridae|GMPJA9556-21|BIOUG66654-A11|BOLD:ADZ8568  
 Mymaridae|GMPJA9366-21|BIOUG66652-A11|BOLD:ADZ8568  
 Mymaridae|GMPJA9756-21|BIOUG66656-B09|BOLD:ADZ8568  
 Mymaridae|GMPJA6985-21|BIOUG66627-E02|BOLD:ADZ8568  
 Tetracneminae|GMPJA9545-21|BIOUG66653-H11|BOLD:ACG6093  
 Tetracneminae|GMPJA302-21|BIOUG65658-F03|BOLD:ACP0359  
 Tetracneminae|GMPJA9830-21|BIOUG66656-H11|BOLD:ACP0359  
 Tetracneminae|GMPJA2828-21|BIOUG65685-B12|BOLD:ACP0359  
 Eulophidae|GMPJA4670-21|BIOUG66604-B03|BOLD:ACY6369  
 Eulophidae|GMPJA802-21|BIOUG65663-H04|BOLD:AEJ4747  
 Eulophidae|GMPJA10479-21|BIOUG70235-A08|BOLD:AEJ4747  
 Eulophidae|GMPJA10476-21|BIOUG70235-A05|BOLD:AEJ4747  
 Eulophidae|GMPJA9810-21|BIOUG66656-G03|BOLD:AEJ4677  
 Eulophidae|GMPJA3725-21|BIOUG65694-B08|BOLD:ADD3506  
 Eulophidae|GMPJA6996-21|BIOUG66627-F01|BOLD:AEJ3111  
 Eulophidae|GMPJA6067-21|BIOUG66617-G10|BOLD:AFB5689  
 Eulophidae|GMPJA9540-21|BIOUG66653-H06|BOLD:AEK0541  
 Eulophidae|GMPJA6031-21|BIOUG66617-D10|BOLD:AEL6569  
 Eulophidae|GMPJA3755-21|BIOUG65694-E02|BOLD:AEJ8695  
 Eulophidae|GMPJA9789-21|BIOUG66656-E06|BOLD:AEJ8695  
 Eulophidae|GMPJA9726-21|BIOUG66655-H02|BOLD:AEJ8695  
 Eulophidae|GMPJA9361-21|BIOUG66652-A06|BOLD:AEJ2508  
 Eulophidae|GMPJA9772-21|BIOUG66656-D01|BOLD:AFB8015  
 Eulophidae|GMPJA9618-21|BIOUG66654-G01|BOLD:AFB8015  
 Eulophidae|GMPJA9692-21|BIOUG66655-E04|BOLD:AFB8015  
 Eulophidae|GMPJA9684-21|BIOUG66655-D08|BOLD:AFB8015  
 Eulophidae|GMPJA6077-21|BIOUG66617-H08|BOLD:AFB8015  
 Eulophidae|GMPJA9755-21|BIOUG66656-B08|BOLD:AEJ8942  
 Eulophidae|GMPJA9751-21|BIOUG66656-B04|BOLD:AEK0816  
 Eulophidae|GMPJA9740-21|BIOUG66656-A05|BOLD:ADV1260  
 Eulophidae|GMPJA9473-21|BIOUG66653-B11|BOLD:ADV1260  
 Eulophidae|GMPJA9905-21|BIOUG66657-G03|BOLD:AEJ4292  
 Tetrastichus|GMPJA9844-21|BIOUG66657-B02|BOLD:AEJ0133  
 Tetrastichus|GMPJA9783-21|BIOUG66656-D12|BOLD:AEJ0133  
 Tetrastichus|GMPJA9333-21|BIOUG66651-G01|BOLD:AEJ0133  
 Eulophidae|GMPJA9855-21|BIOUG66657-C01|BOLD:ACY6228  
 Tetrastichus negundus|GMPJA4744-21|BIOUG66604-H05|BOLD:ADD3736  
 Tetrastichus negundus|GMPJA300-21|BIOUG65658-F01|BOLD:ADD3736  
 Tetrastichus negundus|GMPJA9728-21|BIOUG66655-H04|BOLD:ADD3736  
 Eulophidae|GMPJA9400-21|BIOUG66652-D09|BOLD:ACV1711  
 Tetrastichus|GMPJA9547-21|BIOUG66654-A02|BOLD:AEK0061  
 Tetrastichus|GMPJA9263-21|BIOUG66651-A03|BOLD:AEK0061  
 Eulophidae|GMPJA6946-21|BIOUG66627-A11|BOLD:AEJ4997  
 Tetrastichinae|GMPJA2891-21|BIOUG65685-H03|BOLD:ABX9553  
 Aphelinidae|GMPJA9306-21|BIOUG66651-D10|BOLD:ADS3132  
 Aphelinidae|GMPJA5989-21|BIOUG66617-A04|BOLD:ADS3132  
 Hymenoptera|GMPJA9645-21|BIOUG66655-A05|BOLD:AEJ2960  
 Hymenoptera|GMPJA9552-21|BIOUG66654-A07|BOLD:AEJ2960  
 Mymaridae|GMPJA9604-21|BIOUG66654-E11|BOLD:AEJ1204  
 Mymaridae|GMPJA9864-21|BIOUG66657-C10|BOLD:AEJ1204  
 Mymaridae|GMPJA5768-21|BIOUG66614-F08|BOLD:AEJ1204  
 Mymaridae|GMPJA9638-21|BIOUG66654-H09|BOLD:AEJ1839  
 Camptoptera|GMPJA9268-21|BIOUG66651-A08|BOLD:ADT1847  
 Camptoptera papaveris|GMPJA9899-21|BIOUG66657-F09|BOLD:ACT3998  
 Camptoptera papaveris|GMPJA9323-21|BIOUG66651-F03|BOLD:ACT3998  
 Camptoptera papaveris|GMPJA9482-21|BIOUG66653-C08|BOLD:ACT3998  
 Camptoptera papaveris|GMPJA9341-21|BIOUG66651-G09|BOLD:ACT3998  
 Camptoptera papaveris|GMPJA7058-21|BIOUG66628-C04|BOLD:ACT3998  
 Camptoptera papaveris|GMPJA5776-21|BIOUG66614-G04|BOLD:ACT3998  
 Mymaridae|GMPJA9882-21|BIOUG66657-E04|BOLD:AEL5350  
 Camptoptera|GMPJA9697-21|BIOUG66655-E09|BOLD:ADY7861  
 Camptoptera|GMPJA9526-21|BIOUG66653-G04|BOLD:ADY7861  
 Camptoptera|GMPJA9471-21|BIOUG66653-B09|BOLD:ADY7861  
 Camptoptera|GMPJA9712-21|BIOUG66655-F12|BOLD:ADY7861  
 Camptoptera|GMPJA9525-21|BIOUG66653-G03|BOLD:ADY7861  
 Camptoptera|GMPJA5753-21|BIOUG66614-E05|BOLD:ADY7861  
 Gonatocerus|GMPJA9822-21|BIOUG66656-H03|BOLD:ABX8725  
 Gonatocerus|GMPJA9497-21|BIOUG66653-D11|BOLD:AEK2699  
 Mymaridae|GMPJA6162-21|BIOUG66618-G10|BOLD:AEJ1148  
 Mymaridae|GMPJA9729-21|BIOUG66655-H05|BOLD:AEJ8865

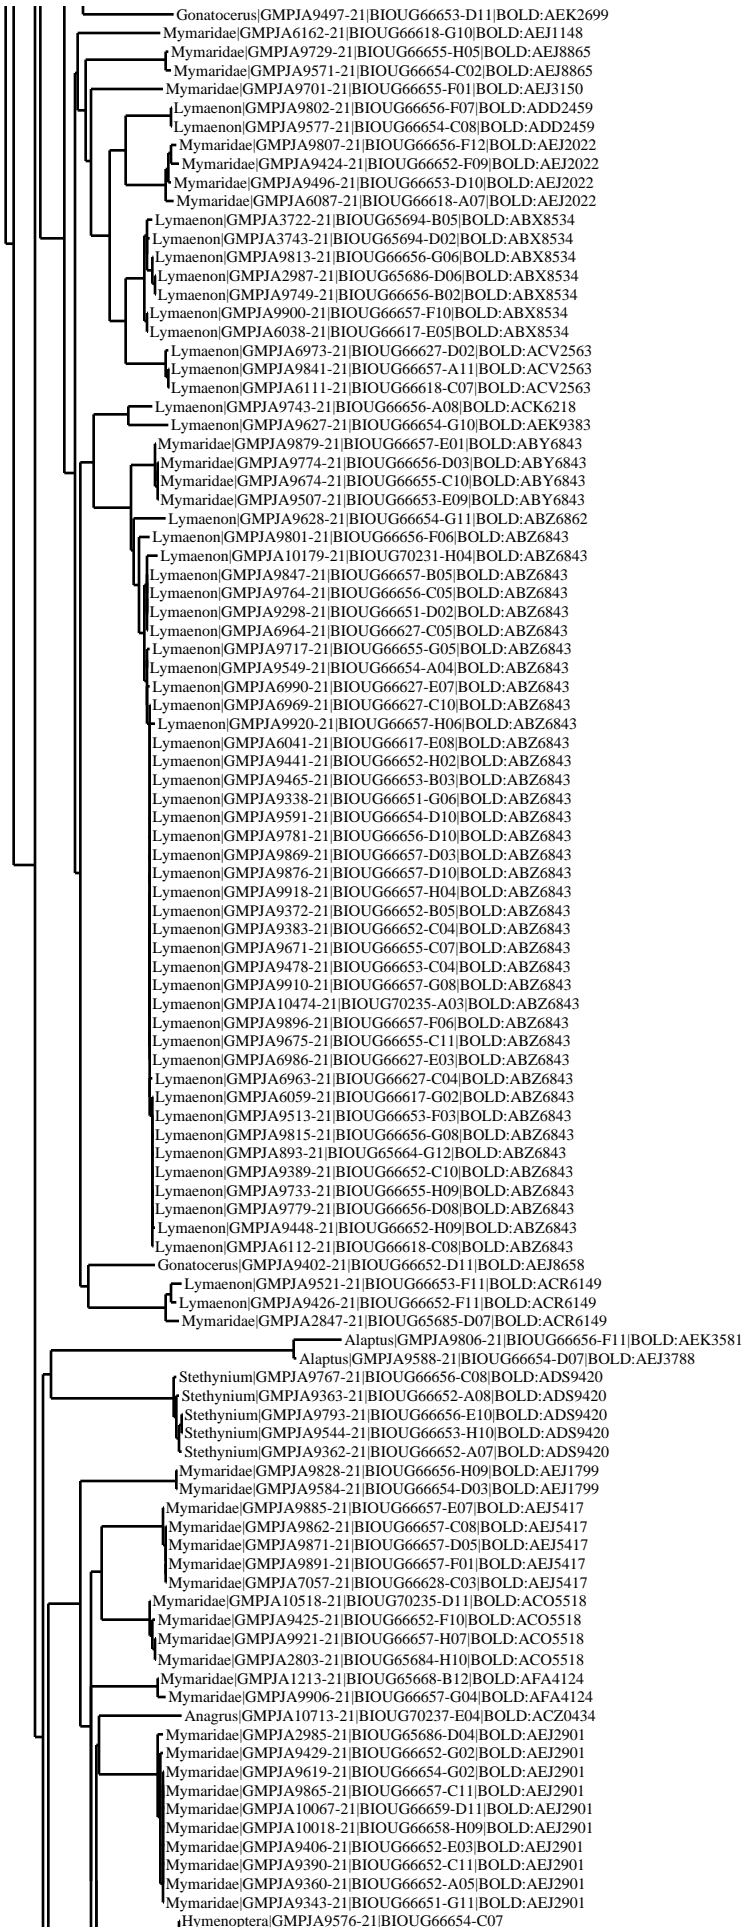

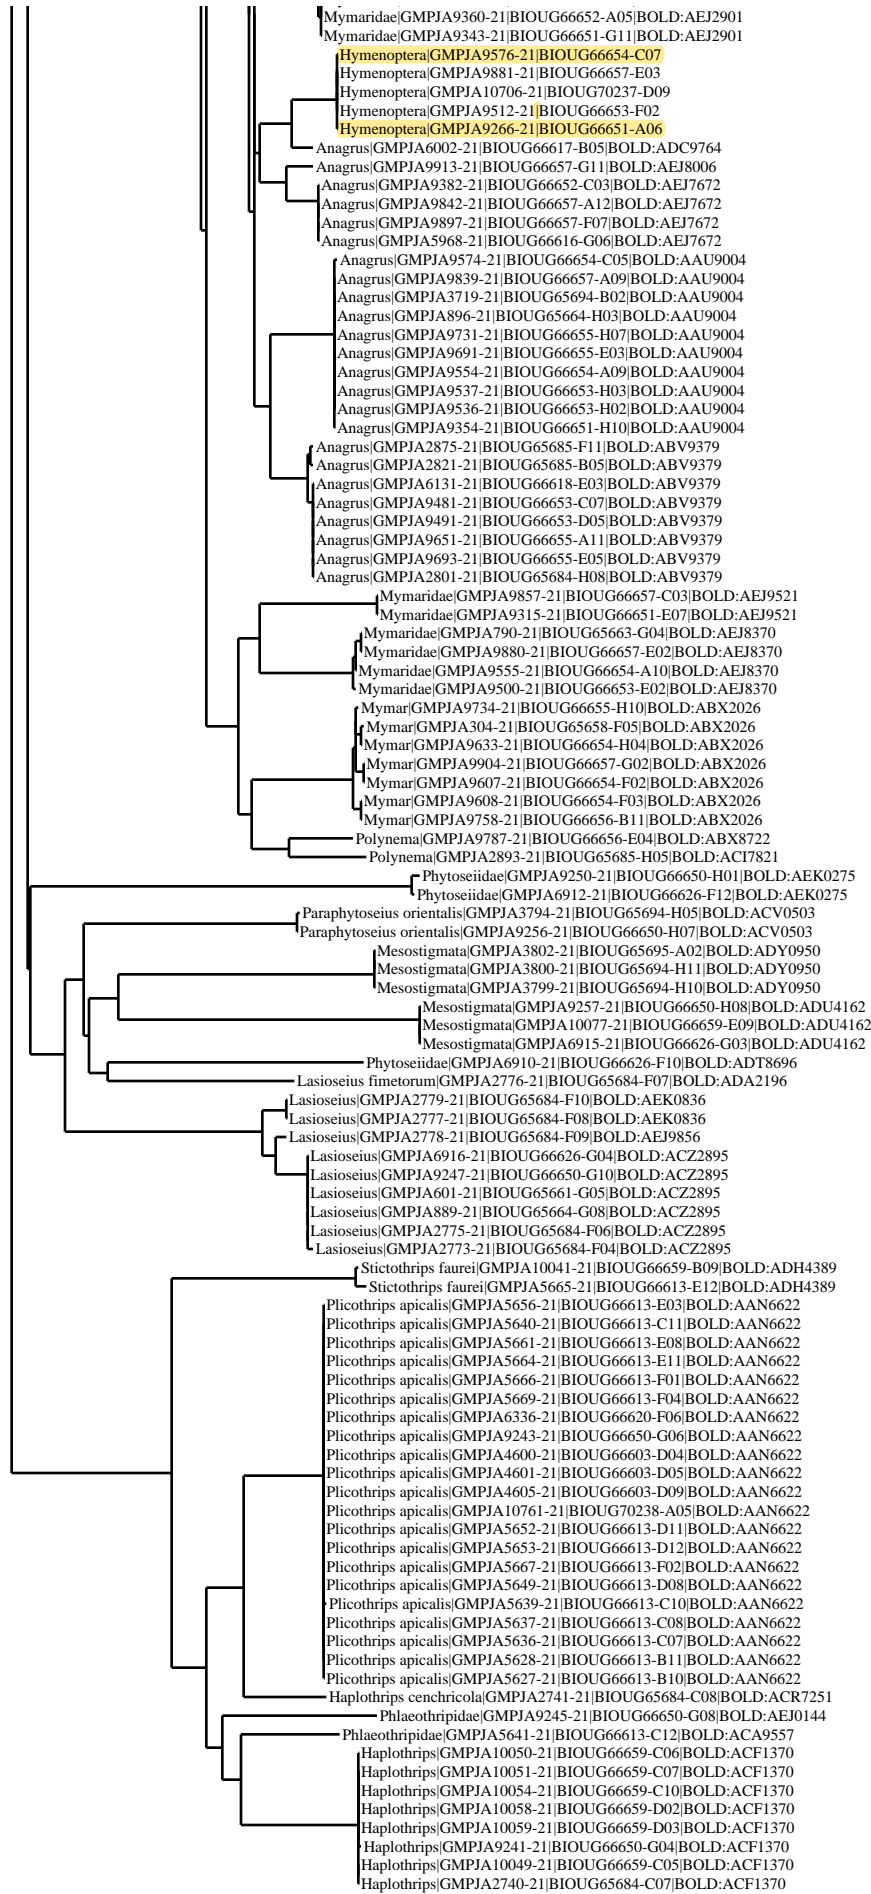

Supplement: FileS4.pdf [file FileS4.pdf]
