# Supplementary material for: Assessing arthropod biodiversity with DNA barcoding in Jinnah Garden, Lahore, Pakistan
Source: PeerJ journal article supplement (doi:10.7717/peerj.17420), 2024-05-31
Supplement: FileS5.pdf [file FileS5.pdf]

# Diversity Measures Result - DS-GMPJA

## Alpha Diversity for All Data (1361 Observed Units - Barcode Cluster (BIN))

### Preston

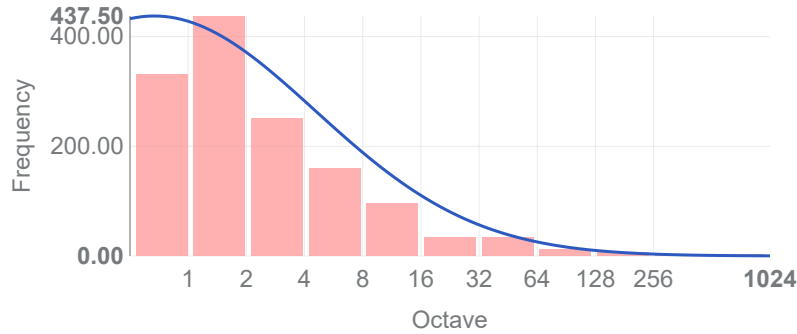

Est. Species: 2785 (Log Normal - Mode: -0.58, Stdev: 2.79, Veiled: 1424).

### Alpha Indices

|   |                                  |         |
|---|----------------------------------|---------|
| ● | Fisher's Alpha Index             | 446.28  |
| ● | Chao-1 Index                     | 2389.74 |
| ● | Simpson Index of Diversity (1-D) | 0.989   |
| ● | Shannon Index                    | 5.77    |

|                          |              |      |
|--------------------------|--------------|------|
| Alpha Diversity per Site | Site Summary | Data |
|--------------------------|--------------|------|

### Map of Sites or Clusters

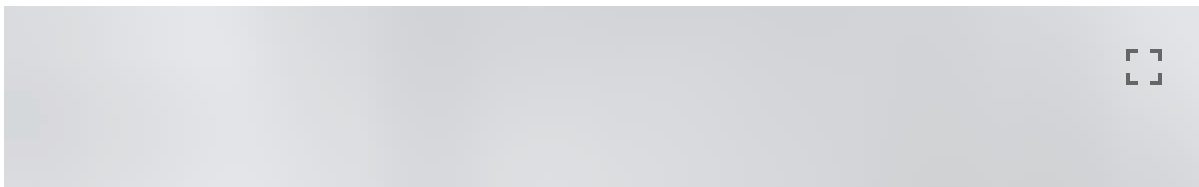

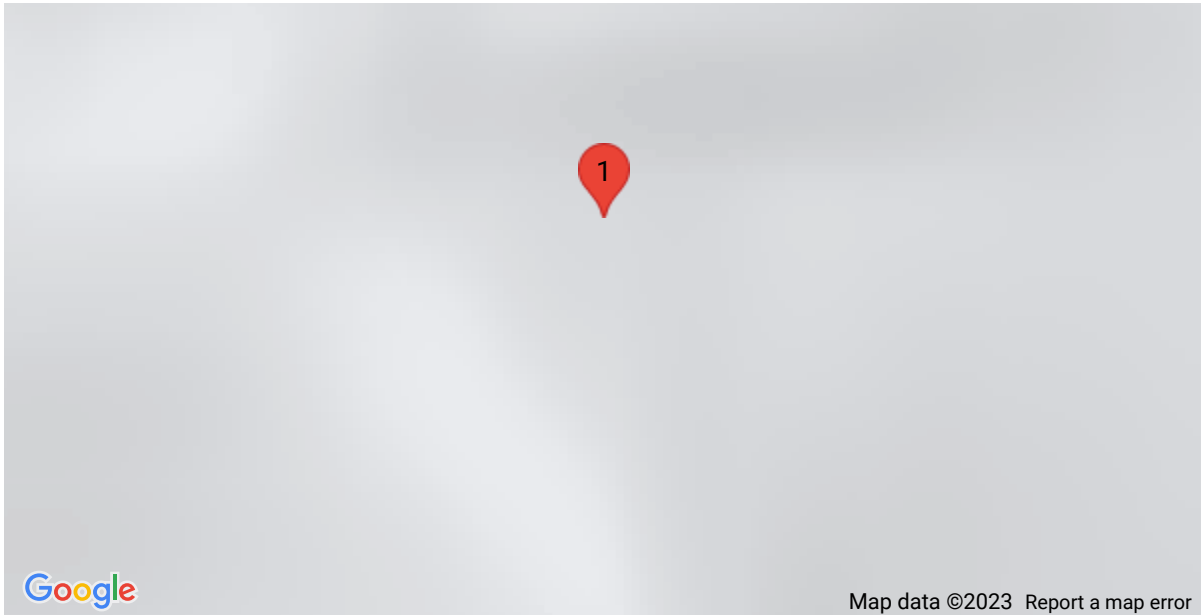

1: null

### Analysis description

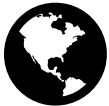

Alpha Diversity and Beta Diversity are used to (1) characterize the numbers of species based on their observed counts, and (2) estimate the total number of species as a function of unique observations and sample size. Alpha Diversity describes the *intrasite* diversity, and Beta Diversity describes the *intersite* diversity.

**Diversity Quantities Computed:** Alpha diversity  
**Number of Sites:** 1

**Features:** Barcode Cluster (BIN), Site Code (2)

**Group By:** Geography: GPS

**Minimum Group Size:** 100

**Filters Applied:** Records with BINs

Filter Summary

Data Summary ➤

Copyright BOLD © 2014-2023
