# Supplementary material for: Assessing arthropod biodiversity with DNA barcoding in Jinnah Garden, Lahore, Pakistan
Source: PeerJ. 2024 May 31;12:e17420. doi: 10.7717/peerj.17420 (PMC11146329; doi:10.7717/peerj.17420)
Supplement: Supplemental Information 1 — For every order, the number of families, genera, species, and BINs is given. [file peerj-12-17420-s001.xlsx]

## Sheet: Sheet1
		Table S1: Count of specimens having DNA barcode records from 17 orders. For every order, the number of families, genera, species, and BINs is given.
		Barcodes assigned BIN	Barcodes without BIN*	Specimens with barcodes	Specimens assigned to BINs (%)	BINs recovered	OTUs without BIN	Records in OTUs	Singleton Bins	Singleton BINs (%)	BINs assigned to family	BINs assigned to family (%)	Families recovered	BINs assigned to genus	BINs assigned to genus (%)	Genera recovered	BINs assigned to species	BINs assigned to species (%)	Species recovered
Class Arachnida	Araneae	33	24	57	57.8947	15	1	1	9	60	12	85.7143	11	10	71.4286	10	4	28.5714	4
	Mesostigmata	24	0	24	100	11	0	0	4	36.3636	9	81.8182	4	6	54.5455	3	3	27.2727	3
	sarcoptiformes	3	0	3	100	1	0	0	0	0	0	0	0	0	0	0	0	0	0
	Trombidiformes	15	0	15	100	5	0	0	3	60	4	80	2	2	40	1	2	40	2
Class Collembola	Entomobryomorpha	87	2	89	97.7528	12	0	0	4	33.3333	10	83.3333	3	5	41.6667	3	2	16.6667	2
	Symphypleona	1	1	2	50	1	0	0	1	100	0	0	0	0	0	0	0	0	0
Class Malacostraca	Isopoda	4	1	5	80	1	0	0	0	0	1	100	1	1	100	1	1	100	1
Class Insecta	Coleoptera	245	32	277	88.4477	86	2	2	47	54.6512	86	100	24	26	30.2326	21	16	18.6047	16
	Diptera	6004	138	6142	97.7532	530	6	6	216	40.7547	529	99.8113	38	172	32.3308	103	65	12.218	64
	Hemiptera	887	109	996	89.0562	122	0	0	52	42.623	121	99.1803	23	72	59.0164	51	38	31.1475	33
	Hymenoptera	1420	127	1547	91.7906	490	8	14	283	57.7551	478	97.551	39	153	31.2245	89	37	7.55102	37
	Lepidoptera	129	26	155	83.2258	48	0	0	25	52.0833	42	87.5	14	28	58.3333	25	15	31.25	15
	Neuroptera	1	0	1	100	1	0	0	1	100	1	100	1	1	100	1	0	0	0
	Odonata	5	0	5	100	2	0	0	1	50	2	100	1	1	50	1	1	0	1
	Orthoptera	5	1	6	83.3333	3	1	1	2	66.6667	3	100	3	2	66.6667	2	2	66.6667	2
	Psocodea	30	4	34	88.2353	9	0	0	4	44.4444	7	77.7778	4	3	33.3333	2	2	22.2222	1
	Thysanoptera	81	11	92	88.0435	24	0	0	10	41.6667	24	100	2	17	70.8333	11	10	41.6667	10
	Total	8974	476	9450	94.963	1361	18		662	48.6407	1329	97.6488	170	499	36.6642	324	198	14.5481	191
			one barcode to class gastropoda of Phylum Mollusca
